# Supplementary material for: A ratio-based framework using Quartet reference materials for integrating long- and short-read RNA-seq
Source: Research Square preprint supplement (doi:10.21203/rs.3.rs-8024543/v1), 2025-12-03
Supplement: Supplementary file 1 [file 34bf4cc540b29139a8be2405.xlsx]

## Sheet: Supplementary Table 1
Table S1. Metadata of the Quartet lrRNA-seq datasets
library_id	library_code	library_protocol	platform	lab	batch	sample	rep	batch_id	lab_code	kit	sequencer	date
D_ONT_LG_B1_D5_1	D	Direct-RNA	ONT	LG	B1	D5	1	D_ONT_LG_B1	GRM	SQK-DCS109	PromethION-48	20240731
D_ONT_LG_B1_D5_2	D	Direct-RNA	ONT	LG	B1	D5	2	D_ONT_LG_B1	GRM	SQK-DCS109	PromethION-48	20240731
D_ONT_LG_B1_D5_3	D	Direct-RNA	ONT	LG	B1	D5	3	D_ONT_LG_B1	GRM	SQK-DCS109	PromethION-48	20240731
D_ONT_LG_B1_D6_1	D	Direct-RNA	ONT	LG	B1	D6	1	D_ONT_LG_B1	GRM	SQK-DCS109	PromethION-48	20240731
D_ONT_LG_B1_D6_2	D	Direct-RNA	ONT	LG	B1	D6	2	D_ONT_LG_B1	GRM	SQK-DCS109	PromethION-48	20240731
D_ONT_LG_B1_D6_3	D	Direct-RNA	ONT	LG	B1	D6	3	D_ONT_LG_B1	GRM	SQK-DCS109	PromethION-48	20240731
D_ONT_LG_B1_F7_1	D	Direct-RNA	ONT	LG	B1	F7	1	D_ONT_LG_B1	GRM	SQK-DCS109	PromethION-48	20240731
D_ONT_LG_B1_F7_2	D	Direct-RNA	ONT	LG	B1	F7	2	D_ONT_LG_B1	GRM	SQK-DCS109	PromethION-48	20240731
D_ONT_LG_B1_F7_3	D	Direct-RNA	ONT	LG	B1	F7	3	D_ONT_LG_B1	GRM	SQK-DCS109	PromethION-48	20240731
D_ONT_LG_B1_M8_1	D	Direct-RNA	ONT	LG	B1	M8	1	D_ONT_LG_B1	GRM	SQK-DCS109	PromethION-48	20240731
D_ONT_LG_B1_M8_2	D	Direct-RNA	ONT	LG	B1	M8	2	D_ONT_LG_B1	GRM	SQK-DCS109	PromethION-48	20240731
D_ONT_LG_B1_M8_3	D	Direct-RNA	ONT	LG	B1	M8	3	D_ONT_LG_B1	GRM	SQK-DCS109	PromethION-48	20240731
D_ONT_LW_B1_D5_1	D	Direct-RNA	ONT	LW	B1	D5	1	D_ONT_LW_B1	BNG	SQK-DCS109	PromethION-48	20250304
D_ONT_LW_B1_D5_2	D	Direct-RNA	ONT	LW	B1	D5	2	D_ONT_LW_B1	BNG	SQK-DCS109	PromethION-48	20250304
D_ONT_LW_B1_D5_3	D	Direct-RNA	ONT	LW	B1	D5	3	D_ONT_LW_B1	BNG	SQK-DCS109	PromethION-48	20250304
D_ONT_LW_B1_D6_1	D	Direct-RNA	ONT	LW	B1	D6	1	D_ONT_LW_B1	BNG	SQK-DCS109	PromethION-48	20250304
D_ONT_LW_B1_D6_2	D	Direct-RNA	ONT	LW	B1	D6	2	D_ONT_LW_B1	BNG	SQK-DCS109	PromethION-48	20250304
D_ONT_LW_B1_D6_3	D	Direct-RNA	ONT	LW	B1	D6	3	D_ONT_LW_B1	BNG	SQK-DCS109	PromethION-48	20250304
D_ONT_LW_B1_F7_1	D	Direct-RNA	ONT	LW	B1	F7	1	D_ONT_LW_B1	BNG	SQK-DCS109	PromethION-48	20250304
D_ONT_LW_B1_F7_2	D	Direct-RNA	ONT	LW	B1	F7	2	D_ONT_LW_B1	BNG	SQK-DCS109	PromethION-48	20250304
D_ONT_LW_B1_F7_3	D	Direct-RNA	ONT	LW	B1	F7	3	D_ONT_LW_B1	BNG	SQK-DCS109	PromethION-48	20250304
D_ONT_LW_B1_M8_1	D	Direct-RNA	ONT	LW	B1	M8	1	D_ONT_LW_B1	BNG	SQK-DCS109	PromethION-48	20250304
D_ONT_LW_B1_M8_2	D	Direct-RNA	ONT	LW	B1	M8	2	D_ONT_LW_B1	BNG	SQK-DCS109	PromethION-48	20250304
D_ONT_LW_B1_M8_3	D	Direct-RNA	ONT	LW	B1	M8	3	D_ONT_LW_B1	BNG	SQK-DCS109	PromethION-48	20250304
I_PAB_LN_B1_D5_1	I	ISO-Seq	PAB	LN	B1	D5	1	I_PAB_LN_B1	NVG	SMRTbell_prep_kit_3.0	Sequel-IIe	20231120
I_PAB_LN_B1_D5_2	I	ISO-Seq	PAB	LN	B1	D5	2	I_PAB_LN_B1	NVG	SMRTbell_prep_kit_3.0	Sequel-IIe	20231120
I_PAB_LN_B1_D5_3	I	ISO-Seq	PAB	LN	B1	D5	3	I_PAB_LN_B1	NVG	SMRTbell_prep_kit_3.0	Sequel-IIe	20231120
I_PAB_LN_B1_D6_1	I	ISO-Seq	PAB	LN	B1	D6	1	I_PAB_LN_B1	NVG	SMRTbell_prep_kit_3.0	Sequel-IIe	20231120
I_PAB_LN_B1_D6_2	I	ISO-Seq	PAB	LN	B1	D6	2	I_PAB_LN_B1	NVG	SMRTbell_prep_kit_3.0	Sequel-IIe	20231120
I_PAB_LN_B1_D6_3	I	ISO-Seq	PAB	LN	B1	D6	3	I_PAB_LN_B1	NVG	SMRTbell_prep_kit_3.0	Sequel-IIe	20231120
I_PAB_LN_B1_F7_1	I	ISO-Seq	PAB	LN	B1	F7	1	I_PAB_LN_B1	NVG	SMRTbell_prep_kit_3.0	Sequel-IIe	20231120
I_PAB_LN_B1_F7_2	I	ISO-Seq	PAB	LN	B1	F7	2	I_PAB_LN_B1	NVG	SMRTbell_prep_kit_3.0	Sequel-IIe	20231120
I_PAB_LN_B1_F7_3	I	ISO-Seq	PAB	LN	B1	F7	3	I_PAB_LN_B1	NVG	SMRTbell_prep_kit_3.0	Sequel-IIe	20231120
I_PAB_LN_B1_M8_1	I	ISO-Seq	PAB	LN	B1	M8	1	I_PAB_LN_B1	NVG	SMRTbell_prep_kit_3.0	Sequel-IIe	20231120
I_PAB_LN_B1_M8_2	I	ISO-Seq	PAB	LN	B1	M8	2	I_PAB_LN_B1	NVG	SMRTbell_prep_kit_3.0	Sequel-IIe	20231120
I_PAB_LN_B1_M8_3	I	ISO-Seq	PAB	LN	B1	M8	3	I_PAB_LN_B1	NVG	SMRTbell_prep_kit_3.0	Sequel-IIe	20231120
I_PAB_LN_B2_D5_1	I	ISO-Seq	PAB	LN	B2	D5	1	I_PAB_LN_B2	NVG	SMRTbell_prep_kit_3.0	Sequel-IIe	20240411
I_PAB_LN_B2_D5_2	I	ISO-Seq	PAB	LN	B2	D5	2	I_PAB_LN_B2	NVG	SMRTbell_prep_kit_3.0	Sequel-IIe	20240411
I_PAB_LN_B2_D5_3	I	ISO-Seq	PAB	LN	B2	D5	3	I_PAB_LN_B2	NVG	SMRTbell_prep_kit_3.0	Sequel-IIe	20240411
I_PAB_LN_B2_D6_1	I	ISO-Seq	PAB	LN	B2	D6	1	I_PAB_LN_B2	NVG	SMRTbell_prep_kit_3.0	Sequel-IIe	20240411
I_PAB_LN_B2_D6_2	I	ISO-Seq	PAB	LN	B2	D6	2	I_PAB_LN_B2	NVG	SMRTbell_prep_kit_3.0	Sequel-IIe	20240411
I_PAB_LN_B2_D6_3	I	ISO-Seq	PAB	LN	B2	D6	3	I_PAB_LN_B2	NVG	SMRTbell_prep_kit_3.0	Sequel-IIe	20240411
I_PAB_LN_B2_F7_1	I	ISO-Seq	PAB	LN	B2	F7	1	I_PAB_LN_B2	NVG	SMRTbell_prep_kit_3.0	Sequel-IIe	20240411
I_PAB_LN_B2_F7_2	I	ISO-Seq	PAB	LN	B2	F7	2	I_PAB_LN_B2	NVG	SMRTbell_prep_kit_3.0	Sequel-IIe	20240411
I_PAB_LN_B2_F7_3	I	ISO-Seq	PAB	LN	B2	F7	3	I_PAB_LN_B2	NVG	SMRTbell_prep_kit_3.0	Sequel-IIe	20240411
I_PAB_LN_B2_M8_1	I	ISO-Seq	PAB	LN	B2	M8	1	I_PAB_LN_B2	NVG	SMRTbell_prep_kit_3.0	Sequel-IIe	20240411
I_PAB_LN_B2_M8_2	I	ISO-Seq	PAB	LN	B2	M8	2	I_PAB_LN_B2	NVG	SMRTbell_prep_kit_3.0	Sequel-IIe	20240411
I_PAB_LN_B2_M8_3	I	ISO-Seq	PAB	LN	B2	M8	3	I_PAB_LN_B2	NVG	SMRTbell_prep_kit_3.0	Sequel-IIe	20240411
M_PAB_LG_B1_D5_1	M	MAS-ISO-Seq	PAB	LG	B1	D5	1	M_PAB_LG_B1	GRM	Kinnex	Revio	20240723
M_PAB_LG_B1_D5_2	M	MAS-ISO-Seq	PAB	LG	B1	D5	2	M_PAB_LG_B1	GRM	Kinnex	Revio	20240723
M_PAB_LG_B1_D5_3	M	MAS-ISO-Seq	PAB	LG	B1	D5	3	M_PAB_LG_B1	GRM	Kinnex	Revio	20240723
M_PAB_LG_B1_D6_1	M	MAS-ISO-Seq	PAB	LG	B1	D6	1	M_PAB_LG_B1	GRM	Kinnex	Revio	20240723
M_PAB_LG_B1_D6_2	M	MAS-ISO-Seq	PAB	LG	B1	D6	2	M_PAB_LG_B1	GRM	Kinnex	Revio	20240723
M_PAB_LG_B1_D6_3	M	MAS-ISO-Seq	PAB	LG	B1	D6	3	M_PAB_LG_B1	GRM	Kinnex	Revio	20240723
M_PAB_LG_B1_F7_1	M	MAS-ISO-Seq	PAB	LG	B1	F7	1	M_PAB_LG_B1	GRM	Kinnex	Revio	20240723
M_PAB_LG_B1_F7_2	M	MAS-ISO-Seq	PAB	LG	B1	F7	2	M_PAB_LG_B1	GRM	Kinnex	Revio	20240723
M_PAB_LG_B1_F7_3	M	MAS-ISO-Seq	PAB	LG	B1	F7	3	M_PAB_LG_B1	GRM	Kinnex	Revio	20240723
M_PAB_LG_B1_M8_1	M	MAS-ISO-Seq	PAB	LG	B1	M8	1	M_PAB_LG_B1	GRM	Kinnex	Revio	20240723
M_PAB_LG_B1_M8_2	M	MAS-ISO-Seq	PAB	LG	B1	M8	2	M_PAB_LG_B1	GRM	Kinnex	Revio	20240723
M_PAB_LG_B1_M8_3	M	MAS-ISO-Seq	PAB	LG	B1	M8	3	M_PAB_LG_B1	GRM	Kinnex	Revio	20240723
M_PAB_LG_B2_D5_1	M	MAS-ISO-Seq	PAB	LG	B2	D5	1	M_PAB_LG_B2	GRM	Kinnex	Revio	20241212
M_PAB_LG_B2_D5_2	M	MAS-ISO-Seq	PAB	LG	B2	D5	2	M_PAB_LG_B2	GRM	Kinnex	Revio	20241212
M_PAB_LG_B2_D5_3	M	MAS-ISO-Seq	PAB	LG	B2	D5	3	M_PAB_LG_B2	GRM	Kinnex	Revio	20241212
M_PAB_LG_B2_D6_1	M	MAS-ISO-Seq	PAB	LG	B2	D6	1	M_PAB_LG_B2	GRM	Kinnex	Revio	20241212
M_PAB_LG_B2_D6_2	M	MAS-ISO-Seq	PAB	LG	B2	D6	2	M_PAB_LG_B2	GRM	Kinnex	Revio	20241212
M_PAB_LG_B2_D6_3	M	MAS-ISO-Seq	PAB	LG	B2	D6	3	M_PAB_LG_B2	GRM	Kinnex	Revio	20241212
M_PAB_LG_B2_F7_1	M	MAS-ISO-Seq	PAB	LG	B2	F7	1	M_PAB_LG_B2	GRM	Kinnex	Revio	20241212
M_PAB_LG_B2_F7_2	M	MAS-ISO-Seq	PAB	LG	B2	F7	2	M_PAB_LG_B2	GRM	Kinnex	Revio	20241212
M_PAB_LG_B2_F7_3	M	MAS-ISO-Seq	PAB	LG	B2	F7	3	M_PAB_LG_B2	GRM	Kinnex	Revio	20241212
M_PAB_LG_B2_M8_1	M	MAS-ISO-Seq	PAB	LG	B2	M8	1	M_PAB_LG_B2	GRM	Kinnex	Revio	20241212
M_PAB_LG_B2_M8_2	M	MAS-ISO-Seq	PAB	LG	B2	M8	2	M_PAB_LG_B2	GRM	Kinnex	Revio	20241212
M_PAB_LG_B2_M8_3	M	MAS-ISO-Seq	PAB	LG	B2	M8	3	M_PAB_LG_B2	GRM	Kinnex	Revio	20241212
M_PAB_LN_B1_D5_1	M	MAS-ISO-Seq	PAB	LN	B1	D5	1	M_PAB_LN_B1	NVG	Kinnex	Revio	20240823
M_PAB_LN_B1_D5_2	M	MAS-ISO-Seq	PAB	LN	B1	D5	2	M_PAB_LN_B1	NVG	Kinnex	Revio	20240823
M_PAB_LN_B1_D5_3	M	MAS-ISO-Seq	PAB	LN	B1	D5	3	M_PAB_LN_B1	NVG	Kinnex	Revio	20240823
M_PAB_LN_B1_D6_1	M	MAS-ISO-Seq	PAB	LN	B1	D6	1	M_PAB_LN_B1	NVG	Kinnex	Revio	20240823
M_PAB_LN_B1_D6_2	M	MAS-ISO-Seq	PAB	LN	B1	D6	2	M_PAB_LN_B1	NVG	Kinnex	Revio	20240823
M_PAB_LN_B1_D6_3	M	MAS-ISO-Seq	PAB	LN	B1	D6	3	M_PAB_LN_B1	NVG	Kinnex	Revio	20240823
M_PAB_LN_B1_F7_1	M	MAS-ISO-Seq	PAB	LN	B1	F7	1	M_PAB_LN_B1	NVG	Kinnex	Revio	20240823
M_PAB_LN_B1_F7_2	M	MAS-ISO-Seq	PAB	LN	B1	F7	2	M_PAB_LN_B1	NVG	Kinnex	Revio	20240823
M_PAB_LN_B1_F7_3	M	MAS-ISO-Seq	PAB	LN	B1	F7	3	M_PAB_LN_B1	NVG	Kinnex	Revio	20240823
M_PAB_LN_B1_M8_1	M	MAS-ISO-Seq	PAB	LN	B1	M8	1	M_PAB_LN_B1	NVG	Kinnex	Revio	20240823
M_PAB_LN_B1_M8_2	M	MAS-ISO-Seq	PAB	LN	B1	M8	2	M_PAB_LN_B1	NVG	Kinnex	Revio	20240823
M_PAB_LN_B1_M8_3	M	MAS-ISO-Seq	PAB	LN	B1	M8	3	M_PAB_LN_B1	NVG	Kinnex	Revio	20240823
P_ONT_LB_B1_D5_1	P	PCR-cDNA	ONT	LB	B1	D5	1	P_ONT_LB_B1	BMK	SQK-LSK110	PromethION-48	20230902
P_ONT_LB_B1_D5_2	P	PCR-cDNA	ONT	LB	B1	D5	2	P_ONT_LB_B1	BMK	SQK-LSK110	PromethION-48	20230902
P_ONT_LB_B1_D5_3	P	PCR-cDNA	ONT	LB	B1	D5	3	P_ONT_LB_B1	BMK	SQK-LSK110	PromethION-48	20230902
P_ONT_LB_B1_D6_1	P	PCR-cDNA	ONT	LB	B1	D6	1	P_ONT_LB_B1	BMK	SQK-LSK110	PromethION-48	20230902
P_ONT_LB_B1_D6_2	P	PCR-cDNA	ONT	LB	B1	D6	2	P_ONT_LB_B1	BMK	SQK-LSK110	PromethION-48	20230902
P_ONT_LB_B1_D6_3	P	PCR-cDNA	ONT	LB	B1	D6	3	P_ONT_LB_B1	BMK	SQK-LSK110	PromethION-48	20230902
P_ONT_LB_B1_F7_1	P	PCR-cDNA	ONT	LB	B1	F7	1	P_ONT_LB_B1	BMK	SQK-LSK110	PromethION-48	20230902
P_ONT_LB_B1_F7_2	P	PCR-cDNA	ONT	LB	B1	F7	2	P_ONT_LB_B1	BMK	SQK-LSK110	PromethION-48	20230902
P_ONT_LB_B1_F7_3	P	PCR-cDNA	ONT	LB	B1	F7	3	P_ONT_LB_B1	BMK	SQK-LSK110	PromethION-48	20230902
P_ONT_LB_B1_M8_1	P	PCR-cDNA	ONT	LB	B1	M8	1	P_ONT_LB_B1	BMK	SQK-LSK110	PromethION-48	20230902
P_ONT_LB_B1_M8_2	P	PCR-cDNA	ONT	LB	B1	M8	2	P_ONT_LB_B1	BMK	SQK-LSK110	PromethION-48	20230902
P_ONT_LB_B1_M8_3	P	PCR-cDNA	ONT	LB	B1	M8	3	P_ONT_LB_B1	BMK	SQK-LSK110	PromethION-48	20230902
P_ONT_LG_B1_D5_1	P	PCR-cDNA	ONT	LG	B1	D5	1	P_ONT_LG_B1	GRM	SQK-LSK114	PromethION-48	20230929
P_ONT_LG_B1_D5_2	P	PCR-cDNA	ONT	LG	B1	D5	2	P_ONT_LG_B1	GRM	SQK-LSK114	PromethION-48	20230929
P_ONT_LG_B1_D5_3	P	PCR-cDNA	ONT	LG	B1	D5	3	P_ONT_LG_B1	GRM	SQK-LSK114	PromethION-48	20230929
P_ONT_LG_B1_D6_1	P	PCR-cDNA	ONT	LG	B1	D6	1	P_ONT_LG_B1	GRM	SQK-LSK114	PromethION-48	20230929
P_ONT_LG_B1_D6_2	P	PCR-cDNA	ONT	LG	B1	D6	2	P_ONT_LG_B1	GRM	SQK-LSK114	PromethION-48	20230929
P_ONT_LG_B1_D6_3	P	PCR-cDNA	ONT	LG	B1	D6	3	P_ONT_LG_B1	GRM	SQK-LSK114	PromethION-48	20230929
P_ONT_LG_B1_F7_1	P	PCR-cDNA	ONT	LG	B1	F7	1	P_ONT_LG_B1	GRM	SQK-LSK114	PromethION-48	20230929
P_ONT_LG_B1_F7_2	P	PCR-cDNA	ONT	LG	B1	F7	2	P_ONT_LG_B1	GRM	SQK-LSK114	PromethION-48	20230929
P_ONT_LG_B1_F7_3	P	PCR-cDNA	ONT	LG	B1	F7	3	P_ONT_LG_B1	GRM	SQK-LSK114	PromethION-48	20230929
P_ONT_LG_B1_M8_1	P	PCR-cDNA	ONT	LG	B1	M8	1	P_ONT_LG_B1	GRM	SQK-LSK114	PromethION-48	20230929
P_ONT_LG_B1_M8_2	P	PCR-cDNA	ONT	LG	B1	M8	2	P_ONT_LG_B1	GRM	SQK-LSK114	PromethION-48	20230929
P_ONT_LG_B1_M8_3	P	PCR-cDNA	ONT	LG	B1	M8	3	P_ONT_LG_B1	GRM	SQK-LSK114	PromethION-48	20230929
P_ONT_LG_B2_D5_1	P	PCR-cDNA	ONT	LG	B2	D5	1	P_ONT_LG_B2	GRM	SQK-LSK114	PromethION-48	20250204
P_ONT_LG_B2_D5_2	P	PCR-cDNA	ONT	LG	B2	D5	2	P_ONT_LG_B2	GRM	SQK-LSK114	PromethION-48	20250204
P_ONT_LG_B2_D5_3	P	PCR-cDNA	ONT	LG	B2	D5	3	P_ONT_LG_B2	GRM	SQK-LSK114	PromethION-48	20250204
P_ONT_LG_B2_D6_1	P	PCR-cDNA	ONT	LG	B2	D6	1	P_ONT_LG_B2	GRM	SQK-LSK114	PromethION-48	20250204
P_ONT_LG_B2_D6_2	P	PCR-cDNA	ONT	LG	B2	D6	2	P_ONT_LG_B2	GRM	SQK-LSK114	PromethION-48	20250204
P_ONT_LG_B2_D6_3	P	PCR-cDNA	ONT	LG	B2	D6	3	P_ONT_LG_B2	GRM	SQK-LSK114	PromethION-48	20250204
P_ONT_LG_B2_F7_1	P	PCR-cDNA	ONT	LG	B2	F7	1	P_ONT_LG_B2	GRM	SQK-LSK114	PromethION-48	20250204
P_ONT_LG_B2_F7_2	P	PCR-cDNA	ONT	LG	B2	F7	2	P_ONT_LG_B2	GRM	SQK-LSK114	PromethION-48	20250204
P_ONT_LG_B2_F7_3	P	PCR-cDNA	ONT	LG	B2	F7	3	P_ONT_LG_B2	GRM	SQK-LSK114	PromethION-48	20250204
P_ONT_LG_B2_M8_1	P	PCR-cDNA	ONT	LG	B2	M8	1	P_ONT_LG_B2	GRM	SQK-LSK114	PromethION-48	20250204
P_ONT_LG_B2_M8_2	P	PCR-cDNA	ONT	LG	B2	M8	2	P_ONT_LG_B2	GRM	SQK-LSK114	PromethION-48	20250204
P_ONT_LG_B2_M8_3	P	PCR-cDNA	ONT	LG	B2	M8	3	P_ONT_LG_B2	GRM	SQK-LSK114	PromethION-48	20250204
P_ONT_LN_B1_D5_1	P	PCR-cDNA	ONT	LN	B1	D5	1	P_ONT_LN_B1	NVG	SQK-LSK114	PromethION-48	20231012
P_ONT_LN_B1_D5_2	P	PCR-cDNA	ONT	LN	B1	D5	2	P_ONT_LN_B1	NVG	SQK-LSK114	PromethION-48	20231012
P_ONT_LN_B1_D5_3	P	PCR-cDNA	ONT	LN	B1	D5	3	P_ONT_LN_B1	NVG	SQK-LSK114	PromethION-48	20231012
P_ONT_LN_B1_D6_1	P	PCR-cDNA	ONT	LN	B1	D6	1	P_ONT_LN_B1	NVG	SQK-LSK114	PromethION-48	20231012
P_ONT_LN_B1_D6_2	P	PCR-cDNA	ONT	LN	B1	D6	2	P_ONT_LN_B1	NVG	SQK-LSK114	PromethION-48	20231012
P_ONT_LN_B1_D6_3	P	PCR-cDNA	ONT	LN	B1	D6	3	P_ONT_LN_B1	NVG	SQK-LSK114	PromethION-48	20231012
P_ONT_LN_B1_F7_1	P	PCR-cDNA	ONT	LN	B1	F7	1	P_ONT_LN_B1	NVG	SQK-LSK114	PromethION-48	20231012
P_ONT_LN_B1_F7_2	P	PCR-cDNA	ONT	LN	B1	F7	2	P_ONT_LN_B1	NVG	SQK-LSK114	PromethION-48	20231012
P_ONT_LN_B1_F7_3	P	PCR-cDNA	ONT	LN	B1	F7	3	P_ONT_LN_B1	NVG	SQK-LSK114	PromethION-48	20231012
P_ONT_LN_B1_M8_1	P	PCR-cDNA	ONT	LN	B1	M8	1	P_ONT_LN_B1	NVG	SQK-LSK114	PromethION-48	20231012
P_ONT_LN_B1_M8_2	P	PCR-cDNA	ONT	LN	B1	M8	2	P_ONT_LN_B1	NVG	SQK-LSK114	PromethION-48	20231012
P_ONT_LN_B1_M8_3	P	PCR-cDNA	ONT	LN	B1	M8	3	P_ONT_LN_B1	NVG	SQK-LSK114	PromethION-48	20231012
P_ONT_LN_B2_D5_1	P	PCR-cDNA	ONT	LN	B2	D5	1	P_ONT_LN_B2	NVG	SQK-LSK114	PromethION-48	20240317
P_ONT_LN_B2_D5_2	P	PCR-cDNA	ONT	LN	B2	D5	2	P_ONT_LN_B2	NVG	SQK-LSK114	PromethION-48	20240317
P_ONT_LN_B2_D5_3	P	PCR-cDNA	ONT	LN	B2	D5	3	P_ONT_LN_B2	NVG	SQK-LSK114	PromethION-48	20240317
P_ONT_LN_B2_D6_1	P	PCR-cDNA	ONT	LN	B2	D6	1	P_ONT_LN_B2	NVG	SQK-LSK114	PromethION-48	20240317
P_ONT_LN_B2_D6_2	P	PCR-cDNA	ONT	LN	B2	D6	2	P_ONT_LN_B2	NVG	SQK-LSK114	PromethION-48	20240317
P_ONT_LN_B2_D6_3	P	PCR-cDNA	ONT	LN	B2	D6	3	P_ONT_LN_B2	NVG	SQK-LSK114	PromethION-48	20240317
P_ONT_LN_B2_F7_1	P	PCR-cDNA	ONT	LN	B2	F7	1	P_ONT_LN_B2	NVG	SQK-LSK114	PromethION-48	20240317
P_ONT_LN_B2_F7_2	P	PCR-cDNA	ONT	LN	B2	F7	2	P_ONT_LN_B2	NVG	SQK-LSK114	PromethION-48	20240317
P_ONT_LN_B2_F7_3	P	PCR-cDNA	ONT	LN	B2	F7	3	P_ONT_LN_B2	NVG	SQK-LSK114	PromethION-48	20240317
P_ONT_LN_B2_M8_1	P	PCR-cDNA	ONT	LN	B2	M8	1	P_ONT_LN_B2	NVG	SQK-LSK114	PromethION-48	20240317
P_ONT_LN_B2_M8_2	P	PCR-cDNA	ONT	LN	B2	M8	2	P_ONT_LN_B2	NVG	SQK-LSK114	PromethION-48	20240317
P_ONT_LN_B2_M8_3	P	PCR-cDNA	ONT	LN	B2	M8	3	P_ONT_LN_B2	NVG	SQK-LSK114	PromethION-48	20240317

## Sheet: Supplementary Table 2
Table S2. Benchmark source comparison
data set	species	Mean number of protocols/sample	#spike in	Median number of replicates per sample	short read	m6A data	#reads	#reads (Long read only)	#direct RNA-Seq reads	#cell lines(tissues)
Quartet	human	6	1	48	yes	yes	20453152241#	1060271165	401668664	4
Kinnex	human	2	1	3	yes	no	1331000000$	603000000	0	1
SG-NEx	human	5	6	3	yes	yes	1403011795	764570868	65288964	14
LRGASP	human	4	3	3	yes	no	116844337	116844337	7452735	4
LRGASP	mouse	4	3	3	yes	yes	64072018	64072018	4325200	1
LRGASP	manatee	3	3	1	yes	no	40948571	40948571	0	1
GSE172421	human	3	2	3	yes	no	556810914	268042441	0	2
ENA-PRJEB27590	mouse	3	1	2	yes	no	540385868	19074452	1145793	2
EBI-E-MTAB-7778	human	3	0	5	yes	no	12274271*	12274271	7946130	2
GTEx_ONT	human	3	0	3	yes	no	619607380	619607380	0	15
SRA-SRR14326969-14326973	human	3	0	3	no	no	74202223	74202223	3357648	2
ENA-PRJNA408327	yeast	2	2	29	yes	no	732314763	10924332	35022993	1
Nanopore Consortium	human	2	2	7	yes	no	37270822	37270822	12989383	1
dbGAP: phs001959.v1.p1	human	2	1	3	no	no	257449641	257449641	0	3
Gruenburger et al.	e. coli	2	0	1	no	no	15557708	15557708	1941324	2
GSE141641	a. thaliana	2	0	3	yes	no	23516197	23516197	0	1
PRJNA497103	yeast	1	3	3	no	no	10100000	10100000	4900000	2
ENA-PRJEB31791	c. elegans	1	2	2	no	no	7971618	7971618	7971618	7
ENA-PRJEB39347	human	1	1	2	no	no	4072667	4072667	4072667	2
ESPRESSO	human	1	1	3	no	no	1082560000	1082560000	4710000	33
GEO-GSE151841	mouse	1	1	4	yes for sequin only	no	81000000^	81000000	0	2
PRJEB32782	a. thaliana	1	1	1	yes	yes	23546554	23546554	23546554	3
PRJEB46978	zebrafish	1	1	2	no	no	3832581	3832581	0	3
PRJEB46978	mouse	1	1	2	no	no	770213	770213	0	1
PRJEB46978	yeast	1	0	1	no	no	257307	257307	0	1
PRJNA634693	yeast	1	1	2	no	no	3044018	3044018	3044018	1
PRJNA634693	e. coli	1	0	2	no	no	2933413	2933413	2933413	1
E-MTAB-10452	human	1	0	1	yes	no	9600000	9600000	0	6
GEO-GSE132971	human	1	0	1	no	yes	6410000	6410000	6410000	4
Massaiu et al.	human	1	0	3	no	no	48495343	48495343	0	1
		Highest	Highest	Highest	yes	yes	Highest	Highest	Highest	Highest
		Second/Third (>=4)	Second/Third (>=3)	>=3	no	No	Second/Third highest	Second/Third highest	Second/Third highest	Second/Third highest
#include short and long reads
^approxmately based on supplementary figure, long read only . In the case short read is used, the numbers for short read are not reported
$approxmately based on main figure. In the case short read is used, the numbers for short read are reported.
*short read not reported
This table was modified from SG-NEx.

## Sheet: Supplementary Table 3
Table S3. Metadata of the Quartet srRNA-seq datasets
library_id	library_code	library_protocol	platform	lab	batch	sample	rep	batch_id	group
P_BGI_L3_B1_D5_1	P	PolyA	BGI	L3	B1	D5	1	P_BGI_L3_B1	Quartet
P_BGI_L3_B1_D5_2	P	PolyA	BGI	L3	B1	D5	2	P_BGI_L3_B1	Quartet
P_BGI_L3_B1_D5_3	P	PolyA	BGI	L3	B1	D5	3	P_BGI_L3_B1	Quartet
P_BGI_L3_B1_D6_1	P	PolyA	BGI	L3	B1	D6	1	P_BGI_L3_B1	Quartet
P_BGI_L3_B1_D6_2	P	PolyA	BGI	L3	B1	D6	2	P_BGI_L3_B1	Quartet
P_BGI_L3_B1_D6_3	P	PolyA	BGI	L3	B1	D6	3	P_BGI_L3_B1	Quartet
P_BGI_L3_B1_F7_1	P	PolyA	BGI	L3	B1	F7	1	P_BGI_L3_B1	Quartet
P_BGI_L3_B1_F7_2	P	PolyA	BGI	L3	B1	F7	2	P_BGI_L3_B1	Quartet
P_BGI_L3_B1_F7_3	P	PolyA	BGI	L3	B1	F7	3	P_BGI_L3_B1	Quartet
P_BGI_L3_B1_M8_1	P	PolyA	BGI	L3	B1	M8	1	P_BGI_L3_B1	Quartet
P_BGI_L3_B1_M8_2	P	PolyA	BGI	L3	B1	M8	2	P_BGI_L3_B1	Quartet
P_BGI_L3_B1_M8_3	P	PolyA	BGI	L3	B1	M8	3	P_BGI_L3_B1	Quartet
P_BGI_L6_B1_D5_1	P	PolyA	BGI	L6	B1	D5	1	P_BGI_L6_B1	Quartet
P_BGI_L6_B1_D5_2	P	PolyA	BGI	L6	B1	D5	2	P_BGI_L6_B1	Quartet
P_BGI_L6_B1_D5_3	P	PolyA	BGI	L6	B1	D5	3	P_BGI_L6_B1	Quartet
P_BGI_L6_B1_D6_1	P	PolyA	BGI	L6	B1	D6	1	P_BGI_L6_B1	Quartet
P_BGI_L6_B1_D6_2	P	PolyA	BGI	L6	B1	D6	2	P_BGI_L6_B1	Quartet
P_BGI_L6_B1_D6_3	P	PolyA	BGI	L6	B1	D6	3	P_BGI_L6_B1	Quartet
P_BGI_L6_B1_F7_1	P	PolyA	BGI	L6	B1	F7	1	P_BGI_L6_B1	Quartet
P_BGI_L6_B1_F7_2	P	PolyA	BGI	L6	B1	F7	2	P_BGI_L6_B1	Quartet
P_BGI_L6_B1_F7_3	P	PolyA	BGI	L6	B1	F7	3	P_BGI_L6_B1	Quartet
P_BGI_L6_B1_M8_1	P	PolyA	BGI	L6	B1	M8	1	P_BGI_L6_B1	Quartet
P_BGI_L6_B1_M8_2	P	PolyA	BGI	L6	B1	M8	2	P_BGI_L6_B1	Quartet
P_BGI_L6_B1_M8_3	P	PolyA	BGI	L6	B1	M8	3	P_BGI_L6_B1	Quartet
P_ILM_L1_B1_D5_1	P	PolyA	ILM	L1	B1	D5	1	P_ILM_L1_B1	Quartet
P_ILM_L1_B1_D5_2	P	PolyA	ILM	L1	B1	D5	2	P_ILM_L1_B1	Quartet
P_ILM_L1_B1_D5_3	P	PolyA	ILM	L1	B1	D5	3	P_ILM_L1_B1	Quartet
P_ILM_L1_B1_D6_1	P	PolyA	ILM	L1	B1	D6	1	P_ILM_L1_B1	Quartet
P_ILM_L1_B1_D6_2	P	PolyA	ILM	L1	B1	D6	2	P_ILM_L1_B1	Quartet
P_ILM_L1_B1_D6_3	P	PolyA	ILM	L1	B1	D6	3	P_ILM_L1_B1	Quartet
P_ILM_L1_B1_F7_1	P	PolyA	ILM	L1	B1	F7	1	P_ILM_L1_B1	Quartet
P_ILM_L1_B1_F7_2	P	PolyA	ILM	L1	B1	F7	2	P_ILM_L1_B1	Quartet
P_ILM_L1_B1_F7_3	P	PolyA	ILM	L1	B1	F7	3	P_ILM_L1_B1	Quartet
P_ILM_L1_B1_M8_1	P	PolyA	ILM	L1	B1	M8	1	P_ILM_L1_B1	Quartet
P_ILM_L1_B1_M8_2	P	PolyA	ILM	L1	B1	M8	2	P_ILM_L1_B1	Quartet
P_ILM_L1_B1_M8_3	P	PolyA	ILM	L1	B1	M8	3	P_ILM_L1_B1	Quartet
P_ILM_L2_B1_D5_1	P	PolyA	ILM	L2	B1	D5	1	P_ILM_L2_B1	Quartet
P_ILM_L2_B1_D5_2	P	PolyA	ILM	L2	B1	D5	2	P_ILM_L2_B1	Quartet
P_ILM_L2_B1_D5_3	P	PolyA	ILM	L2	B1	D5	3	P_ILM_L2_B1	Quartet
P_ILM_L2_B1_D6_1	P	PolyA	ILM	L2	B1	D6	1	P_ILM_L2_B1	Quartet
P_ILM_L2_B1_D6_2	P	PolyA	ILM	L2	B1	D6	2	P_ILM_L2_B1	Quartet
P_ILM_L2_B1_D6_3	P	PolyA	ILM	L2	B1	D6	3	P_ILM_L2_B1	Quartet
P_ILM_L2_B1_F7_1	P	PolyA	ILM	L2	B1	F7	1	P_ILM_L2_B1	Quartet
P_ILM_L2_B1_F7_2	P	PolyA	ILM	L2	B1	F7	2	P_ILM_L2_B1	Quartet
P_ILM_L2_B1_F7_3	P	PolyA	ILM	L2	B1	F7	3	P_ILM_L2_B1	Quartet
P_ILM_L2_B1_M8_1	P	PolyA	ILM	L2	B1	M8	1	P_ILM_L2_B1	Quartet
P_ILM_L2_B1_M8_2	P	PolyA	ILM	L2	B1	M8	2	P_ILM_L2_B1	Quartet
P_ILM_L2_B1_M8_3	P	PolyA	ILM	L2	B1	M8	3	P_ILM_L2_B1	Quartet
P_ILM_L5_B1_D5_1	P	PolyA	ILM	L5	B1	D5	1	P_ILM_L5_B1	Quartet
P_ILM_L5_B1_D5_2	P	PolyA	ILM	L5	B1	D5	2	P_ILM_L5_B1	Quartet
P_ILM_L5_B1_D5_3	P	PolyA	ILM	L5	B1	D5	3	P_ILM_L5_B1	Quartet
P_ILM_L5_B1_D6_1	P	PolyA	ILM	L5	B1	D6	1	P_ILM_L5_B1	Quartet
P_ILM_L5_B1_D6_2	P	PolyA	ILM	L5	B1	D6	2	P_ILM_L5_B1	Quartet
P_ILM_L5_B1_D6_3	P	PolyA	ILM	L5	B1	D6	3	P_ILM_L5_B1	Quartet
P_ILM_L5_B1_F7_1	P	PolyA	ILM	L5	B1	F7	1	P_ILM_L5_B1	Quartet
P_ILM_L5_B1_F7_2	P	PolyA	ILM	L5	B1	F7	2	P_ILM_L5_B1	Quartet
P_ILM_L5_B1_F7_3	P	PolyA	ILM	L5	B1	F7	3	P_ILM_L5_B1	Quartet
P_ILM_L5_B1_M8_1	P	PolyA	ILM	L5	B1	M8	1	P_ILM_L5_B1	Quartet
P_ILM_L5_B1_M8_2	P	PolyA	ILM	L5	B1	M8	2	P_ILM_L5_B1	Quartet
P_ILM_L5_B1_M8_3	P	PolyA	ILM	L5	B1	M8	3	P_ILM_L5_B1	Quartet
P_ILM_L6_B1_D5_1	P	PolyA	ILM	L6	B1	D5	1	P_ILM_L6_B1	Quartet
P_ILM_L6_B1_D5_2	P	PolyA	ILM	L6	B1	D5	2	P_ILM_L6_B1	Quartet
P_ILM_L6_B1_D5_3	P	PolyA	ILM	L6	B1	D5	3	P_ILM_L6_B1	Quartet
P_ILM_L6_B1_D6_1	P	PolyA	ILM	L6	B1	D6	1	P_ILM_L6_B1	Quartet
P_ILM_L6_B1_D6_2	P	PolyA	ILM	L6	B1	D6	2	P_ILM_L6_B1	Quartet
P_ILM_L6_B1_D6_3	P	PolyA	ILM	L6	B1	D6	3	P_ILM_L6_B1	Quartet
P_ILM_L6_B1_F7_1	P	PolyA	ILM	L6	B1	F7	1	P_ILM_L6_B1	Quartet
P_ILM_L6_B1_F7_2	P	PolyA	ILM	L6	B1	F7	2	P_ILM_L6_B1	Quartet
P_ILM_L6_B1_F7_3	P	PolyA	ILM	L6	B1	F7	3	P_ILM_L6_B1	Quartet
P_ILM_L6_B1_M8_1	P	PolyA	ILM	L6	B1	M8	1	P_ILM_L6_B1	Quartet
P_ILM_L6_B1_M8_2	P	PolyA	ILM	L6	B1	M8	2	P_ILM_L6_B1	Quartet
P_ILM_L6_B1_M8_3	P	PolyA	ILM	L6	B1	M8	3	P_ILM_L6_B1	Quartet
P_ILM_L8_B1_D5_1	P	PolyA	ILM	L8	B1	D5	1	P_ILM_L8_B1	Quartet
P_ILM_L8_B1_D5_2	P	PolyA	ILM	L8	B1	D5	2	P_ILM_L8_B1	Quartet
P_ILM_L8_B1_D5_3	P	PolyA	ILM	L8	B1	D5	3	P_ILM_L8_B1	Quartet
P_ILM_L8_B1_D6_1	P	PolyA	ILM	L8	B1	D6	1	P_ILM_L8_B1	Quartet
P_ILM_L8_B1_D6_2	P	PolyA	ILM	L8	B1	D6	2	P_ILM_L8_B1	Quartet
P_ILM_L8_B1_D6_3	P	PolyA	ILM	L8	B1	D6	3	P_ILM_L8_B1	Quartet
P_ILM_L8_B1_F7_1	P	PolyA	ILM	L8	B1	F7	1	P_ILM_L8_B1	Quartet
P_ILM_L8_B1_F7_2	P	PolyA	ILM	L8	B1	F7	2	P_ILM_L8_B1	Quartet
P_ILM_L8_B1_F7_3	P	PolyA	ILM	L8	B1	F7	3	P_ILM_L8_B1	Quartet
P_ILM_L8_B1_M8_1	P	PolyA	ILM	L8	B1	M8	1	P_ILM_L8_B1	Quartet
P_ILM_L8_B1_M8_2	P	PolyA	ILM	L8	B1	M8	2	P_ILM_L8_B1	Quartet
P_ILM_L8_B1_M8_3	P	PolyA	ILM	L8	B1	M8	3	P_ILM_L8_B1	Quartet
R_BGI_L3_B1_D5_1	R	RiboZ	BGI	L3	B1	D5	1	R_BGI_L3_B1	Quartet
R_BGI_L3_B1_D5_2	R	RiboZ	BGI	L3	B1	D5	2	R_BGI_L3_B1	Quartet
R_BGI_L3_B1_D5_3	R	RiboZ	BGI	L3	B1	D5	3	R_BGI_L3_B1	Quartet
R_BGI_L3_B1_D6_1	R	RiboZ	BGI	L3	B1	D6	1	R_BGI_L3_B1	Quartet
R_BGI_L3_B1_D6_2	R	RiboZ	BGI	L3	B1	D6	2	R_BGI_L3_B1	Quartet
R_BGI_L3_B1_D6_3	R	RiboZ	BGI	L3	B1	D6	3	R_BGI_L3_B1	Quartet
R_BGI_L3_B1_F7_1	R	RiboZ	BGI	L3	B1	F7	1	R_BGI_L3_B1	Quartet
R_BGI_L3_B1_F7_2	R	RiboZ	BGI	L3	B1	F7	2	R_BGI_L3_B1	Quartet
R_BGI_L3_B1_F7_3	R	RiboZ	BGI	L3	B1	F7	3	R_BGI_L3_B1	Quartet
R_BGI_L3_B1_M8_1	R	RiboZ	BGI	L3	B1	M8	1	R_BGI_L3_B1	Quartet
R_BGI_L3_B1_M8_2	R	RiboZ	BGI	L3	B1	M8	2	R_BGI_L3_B1	Quartet
R_BGI_L3_B1_M8_3	R	RiboZ	BGI	L3	B1	M8	3	R_BGI_L3_B1	Quartet
R_BGI_L6_B1_D5_1	R	RiboZ	BGI	L6	B1	D5	1	R_BGI_L6_B1	Quartet
R_BGI_L6_B1_D5_2	R	RiboZ	BGI	L6	B1	D5	2	R_BGI_L6_B1	Quartet
R_BGI_L6_B1_D5_3	R	RiboZ	BGI	L6	B1	D5	3	R_BGI_L6_B1	Quartet
R_BGI_L6_B1_D6_1	R	RiboZ	BGI	L6	B1	D6	1	R_BGI_L6_B1	Quartet
R_BGI_L6_B1_D6_2	R	RiboZ	BGI	L6	B1	D6	2	R_BGI_L6_B1	Quartet
R_BGI_L6_B1_D6_3	R	RiboZ	BGI	L6	B1	D6	3	R_BGI_L6_B1	Quartet
R_BGI_L6_B1_F7_1	R	RiboZ	BGI	L6	B1	F7	1	R_BGI_L6_B1	Quartet
R_BGI_L6_B1_F7_2	R	RiboZ	BGI	L6	B1	F7	2	R_BGI_L6_B1	Quartet
R_BGI_L6_B1_F7_3	R	RiboZ	BGI	L6	B1	F7	3	R_BGI_L6_B1	Quartet
R_BGI_L6_B1_M8_1	R	RiboZ	BGI	L6	B1	M8	1	R_BGI_L6_B1	Quartet
R_BGI_L6_B1_M8_2	R	RiboZ	BGI	L6	B1	M8	2	R_BGI_L6_B1	Quartet
R_BGI_L6_B1_M8_3	R	RiboZ	BGI	L6	B1	M8	3	R_BGI_L6_B1	Quartet
R_BGI_L7_B1_D5_1	R	RiboZ	BGI	L7	B1	D5	1	R_BGI_L7_B1	Quartet
R_BGI_L7_B1_D5_2	R	RiboZ	BGI	L7	B1	D5	2	R_BGI_L7_B1	Quartet
R_BGI_L7_B1_D5_3	R	RiboZ	BGI	L7	B1	D5	3	R_BGI_L7_B1	Quartet
R_BGI_L7_B1_D6_1	R	RiboZ	BGI	L7	B1	D6	1	R_BGI_L7_B1	Quartet
R_BGI_L7_B1_D6_2	R	RiboZ	BGI	L7	B1	D6	2	R_BGI_L7_B1	Quartet
R_BGI_L7_B1_D6_3	R	RiboZ	BGI	L7	B1	D6	3	R_BGI_L7_B1	Quartet
R_BGI_L7_B1_F7_1	R	RiboZ	BGI	L7	B1	F7	1	R_BGI_L7_B1	Quartet
R_BGI_L7_B1_F7_2	R	RiboZ	BGI	L7	B1	F7	2	R_BGI_L7_B1	Quartet
R_BGI_L7_B1_F7_3	R	RiboZ	BGI	L7	B1	F7	3	R_BGI_L7_B1	Quartet
R_BGI_L7_B1_M8_1	R	RiboZ	BGI	L7	B1	M8	1	R_BGI_L7_B1	Quartet
R_BGI_L7_B1_M8_2	R	RiboZ	BGI	L7	B1	M8	2	R_BGI_L7_B1	Quartet
R_BGI_L7_B1_M8_3	R	RiboZ	BGI	L7	B1	M8	3	R_BGI_L7_B1	Quartet
R_ELE_LH_B1_D5_1	R	RiboZ	ELE	LH	B1	D5	1	R_ELE_LH_B1	Quartet
R_ELE_LH_B1_D5_2	R	RiboZ	ELE	LH	B1	D5	2	R_ELE_LH_B1	Quartet
R_ELE_LH_B1_D5_3	R	RiboZ	ELE	LH	B1	D5	3	R_ELE_LH_B1	Quartet
R_ELE_LH_B1_D6_1	R	RiboZ	ELE	LH	B1	D6	1	R_ELE_LH_B1	Quartet
R_ELE_LH_B1_D6_2	R	RiboZ	ELE	LH	B1	D6	2	R_ELE_LH_B1	Quartet
R_ELE_LH_B1_D6_3	R	RiboZ	ELE	LH	B1	D6	3	R_ELE_LH_B1	Quartet
R_ELE_LH_B1_F7_1	R	RiboZ	ELE	LH	B1	F7	1	R_ELE_LH_B1	Quartet
R_ELE_LH_B1_F7_2	R	RiboZ	ELE	LH	B1	F7	2	R_ELE_LH_B1	Quartet
R_ELE_LH_B1_F7_3	R	RiboZ	ELE	LH	B1	F7	3	R_ELE_LH_B1	Quartet
R_ELE_LH_B1_M8_1	R	RiboZ	ELE	LH	B1	M8	1	R_ELE_LH_B1	Quartet
R_ELE_LH_B1_M8_2	R	RiboZ	ELE	LH	B1	M8	2	R_ELE_LH_B1	Quartet
R_ELE_LH_B1_M8_3	R	RiboZ	ELE	LH	B1	M8	3	R_ELE_LH_B1	Quartet
R_ILM_L1_B1_D5_1	R	RiboZ	ILM	L1	B1	D5	1	R_ILM_L1_B1	Quartet
R_ILM_L1_B1_D5_2	R	RiboZ	ILM	L1	B1	D5	2	R_ILM_L1_B1	Quartet
R_ILM_L1_B1_D5_3	R	RiboZ	ILM	L1	B1	D5	3	R_ILM_L1_B1	Quartet
R_ILM_L1_B1_D6_1	R	RiboZ	ILM	L1	B1	D6	1	R_ILM_L1_B1	Quartet
R_ILM_L1_B1_D6_2	R	RiboZ	ILM	L1	B1	D6	2	R_ILM_L1_B1	Quartet
R_ILM_L1_B1_D6_3	R	RiboZ	ILM	L1	B1	D6	3	R_ILM_L1_B1	Quartet
R_ILM_L1_B1_F7_1	R	RiboZ	ILM	L1	B1	F7	1	R_ILM_L1_B1	Quartet
R_ILM_L1_B1_F7_2	R	RiboZ	ILM	L1	B1	F7	2	R_ILM_L1_B1	Quartet
R_ILM_L1_B1_F7_3	R	RiboZ	ILM	L1	B1	F7	3	R_ILM_L1_B1	Quartet
R_ILM_L1_B1_M8_1	R	RiboZ	ILM	L1	B1	M8	1	R_ILM_L1_B1	Quartet
R_ILM_L1_B1_M8_2	R	RiboZ	ILM	L1	B1	M8	2	R_ILM_L1_B1	Quartet
R_ILM_L1_B1_M8_3	R	RiboZ	ILM	L1	B1	M8	3	R_ILM_L1_B1	Quartet
R_ILM_L2_B1_D5_1	R	RiboZ	ILM	L2	B1	D5	1	R_ILM_L2_B1	Quartet
R_ILM_L2_B1_D5_2	R	RiboZ	ILM	L2	B1	D5	2	R_ILM_L2_B1	Quartet
R_ILM_L2_B1_D5_3	R	RiboZ	ILM	L2	B1	D5	3	R_ILM_L2_B1	Quartet
R_ILM_L2_B1_D6_1	R	RiboZ	ILM	L2	B1	D6	1	R_ILM_L2_B1	Quartet
R_ILM_L2_B1_D6_2	R	RiboZ	ILM	L2	B1	D6	2	R_ILM_L2_B1	Quartet
R_ILM_L2_B1_D6_3	R	RiboZ	ILM	L2	B1	D6	3	R_ILM_L2_B1	Quartet
R_ILM_L2_B1_F7_1	R	RiboZ	ILM	L2	B1	F7	1	R_ILM_L2_B1	Quartet
R_ILM_L2_B1_F7_2	R	RiboZ	ILM	L2	B1	F7	2	R_ILM_L2_B1	Quartet
R_ILM_L2_B1_F7_3	R	RiboZ	ILM	L2	B1	F7	3	R_ILM_L2_B1	Quartet
R_ILM_L2_B1_M8_1	R	RiboZ	ILM	L2	B1	M8	1	R_ILM_L2_B1	Quartet
R_ILM_L2_B1_M8_2	R	RiboZ	ILM	L2	B1	M8	2	R_ILM_L2_B1	Quartet
R_ILM_L2_B1_M8_3	R	RiboZ	ILM	L2	B1	M8	3	R_ILM_L2_B1	Quartet
R_ILM_L2_B2_D5_1	R	RiboZ	ILM	L2	B2	D5	1	R_ILM_L2_B2	Quartet
R_ILM_L2_B2_D5_2	R	RiboZ	ILM	L2	B2	D5	2	R_ILM_L2_B2	Quartet
R_ILM_L2_B2_D5_3	R	RiboZ	ILM	L2	B2	D5	3	R_ILM_L2_B2	Quartet
R_ILM_L2_B2_D6_1	R	RiboZ	ILM	L2	B2	D6	1	R_ILM_L2_B2	Quartet
R_ILM_L2_B2_D6_2	R	RiboZ	ILM	L2	B2	D6	2	R_ILM_L2_B2	Quartet
R_ILM_L2_B2_D6_3	R	RiboZ	ILM	L2	B2	D6	3	R_ILM_L2_B2	Quartet
R_ILM_L2_B2_F7_1	R	RiboZ	ILM	L2	B2	F7	1	R_ILM_L2_B2	Quartet
R_ILM_L2_B2_F7_2	R	RiboZ	ILM	L2	B2	F7	2	R_ILM_L2_B2	Quartet
R_ILM_L2_B2_F7_3	R	RiboZ	ILM	L2	B2	F7	3	R_ILM_L2_B2	Quartet
R_ILM_L2_B2_M8_1	R	RiboZ	ILM	L2	B2	M8	1	R_ILM_L2_B2	Quartet
R_ILM_L2_B2_M8_2	R	RiboZ	ILM	L2	B2	M8	2	R_ILM_L2_B2	Quartet
R_ILM_L2_B2_M8_3	R	RiboZ	ILM	L2	B2	M8	3	R_ILM_L2_B2	Quartet
R_ILM_L4_B1_D5_1	R	RiboZ	ILM	L4	B1	D5	1	R_ILM_L4_B1	Quartet
R_ILM_L4_B1_D5_2	R	RiboZ	ILM	L4	B1	D5	2	R_ILM_L4_B1	Quartet
R_ILM_L4_B1_D5_3	R	RiboZ	ILM	L4	B1	D5	3	R_ILM_L4_B1	Quartet
R_ILM_L4_B1_D6_1	R	RiboZ	ILM	L4	B1	D6	1	R_ILM_L4_B1	Quartet
R_ILM_L4_B1_D6_2	R	RiboZ	ILM	L4	B1	D6	2	R_ILM_L4_B1	Quartet
R_ILM_L4_B1_D6_3	R	RiboZ	ILM	L4	B1	D6	3	R_ILM_L4_B1	Quartet
R_ILM_L4_B1_F7_1	R	RiboZ	ILM	L4	B1	F7	1	R_ILM_L4_B1	Quartet
R_ILM_L4_B1_F7_2	R	RiboZ	ILM	L4	B1	F7	2	R_ILM_L4_B1	Quartet
R_ILM_L4_B1_F7_3	R	RiboZ	ILM	L4	B1	F7	3	R_ILM_L4_B1	Quartet
R_ILM_L4_B1_M8_1	R	RiboZ	ILM	L4	B1	M8	1	R_ILM_L4_B1	Quartet
R_ILM_L4_B1_M8_2	R	RiboZ	ILM	L4	B1	M8	2	R_ILM_L4_B1	Quartet
R_ILM_L4_B1_M8_3	R	RiboZ	ILM	L4	B1	M8	3	R_ILM_L4_B1	Quartet
R_ILM_L4_B2_D5_1	R	RiboZ	ILM	L4	B2	D5	1	R_ILM_L4_B2	Quartet
R_ILM_L4_B2_D5_2	R	RiboZ	ILM	L4	B2	D5	2	R_ILM_L4_B2	Quartet
R_ILM_L4_B2_D5_3	R	RiboZ	ILM	L4	B2	D5	3	R_ILM_L4_B2	Quartet
R_ILM_L4_B2_D6_1	R	RiboZ	ILM	L4	B2	D6	1	R_ILM_L4_B2	Quartet
R_ILM_L4_B2_D6_2	R	RiboZ	ILM	L4	B2	D6	2	R_ILM_L4_B2	Quartet
R_ILM_L4_B2_D6_3	R	RiboZ	ILM	L4	B2	D6	3	R_ILM_L4_B2	Quartet
R_ILM_L4_B2_F7_1	R	RiboZ	ILM	L4	B2	F7	1	R_ILM_L4_B2	Quartet
R_ILM_L4_B2_F7_2	R	RiboZ	ILM	L4	B2	F7	2	R_ILM_L4_B2	Quartet
R_ILM_L4_B2_F7_3	R	RiboZ	ILM	L4	B2	F7	3	R_ILM_L4_B2	Quartet
R_ILM_L4_B2_M8_1	R	RiboZ	ILM	L4	B2	M8	1	R_ILM_L4_B2	Quartet
R_ILM_L4_B2_M8_2	R	RiboZ	ILM	L4	B2	M8	2	R_ILM_L4_B2	Quartet
R_ILM_L4_B2_M8_3	R	RiboZ	ILM	L4	B2	M8	3	R_ILM_L4_B2	Quartet
R_ILM_L4_B3_D5_1	R	RiboZ	ILM	L4	B3	D5	1	R_ILM_L4_B3	Quartet
R_ILM_L4_B3_D5_2	R	RiboZ	ILM	L4	B3	D5	2	R_ILM_L4_B3	Quartet
R_ILM_L4_B3_D5_3	R	RiboZ	ILM	L4	B3	D5	3	R_ILM_L4_B3	Quartet
R_ILM_L4_B3_D6_1	R	RiboZ	ILM	L4	B3	D6	1	R_ILM_L4_B3	Quartet
R_ILM_L4_B3_D6_2	R	RiboZ	ILM	L4	B3	D6	2	R_ILM_L4_B3	Quartet
R_ILM_L4_B3_D6_3	R	RiboZ	ILM	L4	B3	D6	3	R_ILM_L4_B3	Quartet
R_ILM_L4_B3_F7_1	R	RiboZ	ILM	L4	B3	F7	1	R_ILM_L4_B3	Quartet
R_ILM_L4_B3_F7_2	R	RiboZ	ILM	L4	B3	F7	2	R_ILM_L4_B3	Quartet
R_ILM_L4_B3_F7_3	R	RiboZ	ILM	L4	B3	F7	3	R_ILM_L4_B3	Quartet
R_ILM_L4_B3_M8_1	R	RiboZ	ILM	L4	B3	M8	1	R_ILM_L4_B3	Quartet
R_ILM_L4_B3_M8_2	R	RiboZ	ILM	L4	B3	M8	2	R_ILM_L4_B3	Quartet
R_ILM_L4_B3_M8_3	R	RiboZ	ILM	L4	B3	M8	3	R_ILM_L4_B3	Quartet
R_ILM_L5_B1_D5_1	R	RiboZ	ILM	L5	B1	D5	1	R_ILM_L5_B1	Quartet
R_ILM_L5_B1_D5_2	R	RiboZ	ILM	L5	B1	D5	2	R_ILM_L5_B1	Quartet
R_ILM_L5_B1_D5_3	R	RiboZ	ILM	L5	B1	D5	3	R_ILM_L5_B1	Quartet
R_ILM_L5_B1_D6_1	R	RiboZ	ILM	L5	B1	D6	1	R_ILM_L5_B1	Quartet
R_ILM_L5_B1_D6_2	R	RiboZ	ILM	L5	B1	D6	2	R_ILM_L5_B1	Quartet
R_ILM_L5_B1_D6_3	R	RiboZ	ILM	L5	B1	D6	3	R_ILM_L5_B1	Quartet
R_ILM_L5_B1_F7_1	R	RiboZ	ILM	L5	B1	F7	1	R_ILM_L5_B1	Quartet
R_ILM_L5_B1_F7_2	R	RiboZ	ILM	L5	B1	F7	2	R_ILM_L5_B1	Quartet
R_ILM_L5_B1_F7_3	R	RiboZ	ILM	L5	B1	F7	3	R_ILM_L5_B1	Quartet
R_ILM_L5_B1_M8_1	R	RiboZ	ILM	L5	B1	M8	1	R_ILM_L5_B1	Quartet
R_ILM_L5_B1_M8_2	R	RiboZ	ILM	L5	B1	M8	2	R_ILM_L5_B1	Quartet
R_ILM_L5_B1_M8_3	R	RiboZ	ILM	L5	B1	M8	3	R_ILM_L5_B1	Quartet
R_ILM_L5_B2_D5_1	R	RiboZ	ILM	L5	B2	D5	1	R_ILM_L5_B2	Quartet
R_ILM_L5_B2_D5_2	R	RiboZ	ILM	L5	B2	D5	2	R_ILM_L5_B2	Quartet
R_ILM_L5_B2_D5_3	R	RiboZ	ILM	L5	B2	D5	3	R_ILM_L5_B2	Quartet
R_ILM_L5_B2_D6_1	R	RiboZ	ILM	L5	B2	D6	1	R_ILM_L5_B2	Quartet
R_ILM_L5_B2_D6_2	R	RiboZ	ILM	L5	B2	D6	2	R_ILM_L5_B2	Quartet
R_ILM_L5_B2_D6_3	R	RiboZ	ILM	L5	B2	D6	3	R_ILM_L5_B2	Quartet
R_ILM_L5_B2_F7_1	R	RiboZ	ILM	L5	B2	F7	1	R_ILM_L5_B2	Quartet
R_ILM_L5_B2_F7_2	R	RiboZ	ILM	L5	B2	F7	2	R_ILM_L5_B2	Quartet
R_ILM_L5_B2_F7_3	R	RiboZ	ILM	L5	B2	F7	3	R_ILM_L5_B2	Quartet
R_ILM_L5_B2_M8_1	R	RiboZ	ILM	L5	B2	M8	1	R_ILM_L5_B2	Quartet
R_ILM_L5_B2_M8_2	R	RiboZ	ILM	L5	B2	M8	2	R_ILM_L5_B2	Quartet
R_ILM_L5_B2_M8_3	R	RiboZ	ILM	L5	B2	M8	3	R_ILM_L5_B2	Quartet
R_ILM_L5_B3_D5_1	R	RiboZ	ILM	L5	B3	D5	1	R_ILM_L5_B3	Quartet
R_ILM_L5_B3_D5_2	R	RiboZ	ILM	L5	B3	D5	2	R_ILM_L5_B3	Quartet
R_ILM_L5_B3_D5_3	R	RiboZ	ILM	L5	B3	D5	3	R_ILM_L5_B3	Quartet
R_ILM_L5_B3_D6_1	R	RiboZ	ILM	L5	B3	D6	1	R_ILM_L5_B3	Quartet
R_ILM_L5_B3_D6_2	R	RiboZ	ILM	L5	B3	D6	2	R_ILM_L5_B3	Quartet
R_ILM_L5_B3_D6_3	R	RiboZ	ILM	L5	B3	D6	3	R_ILM_L5_B3	Quartet
R_ILM_L5_B3_F7_1	R	RiboZ	ILM	L5	B3	F7	1	R_ILM_L5_B3	Quartet
R_ILM_L5_B3_F7_2	R	RiboZ	ILM	L5	B3	F7	2	R_ILM_L5_B3	Quartet
R_ILM_L5_B3_F7_3	R	RiboZ	ILM	L5	B3	F7	3	R_ILM_L5_B3	Quartet
R_ILM_L5_B3_M8_1	R	RiboZ	ILM	L5	B3	M8	1	R_ILM_L5_B3	Quartet
R_ILM_L5_B3_M8_2	R	RiboZ	ILM	L5	B3	M8	2	R_ILM_L5_B3	Quartet
R_ILM_L5_B3_M8_3	R	RiboZ	ILM	L5	B3	M8	3	R_ILM_L5_B3	Quartet
R_ILM_L6_B1_D5_1	R	RiboZ	ILM	L6	B1	D5	1	R_ILM_L6_B1	Quartet
R_ILM_L6_B1_D5_2	R	RiboZ	ILM	L6	B1	D5	2	R_ILM_L6_B1	Quartet
R_ILM_L6_B1_D5_3	R	RiboZ	ILM	L6	B1	D5	3	R_ILM_L6_B1	Quartet
R_ILM_L6_B1_D6_1	R	RiboZ	ILM	L6	B1	D6	1	R_ILM_L6_B1	Quartet
R_ILM_L6_B1_D6_2	R	RiboZ	ILM	L6	B1	D6	2	R_ILM_L6_B1	Quartet
R_ILM_L6_B1_D6_3	R	RiboZ	ILM	L6	B1	D6	3	R_ILM_L6_B1	Quartet
R_ILM_L6_B1_F7_1	R	RiboZ	ILM	L6	B1	F7	1	R_ILM_L6_B1	Quartet
R_ILM_L6_B1_F7_2	R	RiboZ	ILM	L6	B1	F7	2	R_ILM_L6_B1	Quartet
R_ILM_L6_B1_F7_3	R	RiboZ	ILM	L6	B1	F7	3	R_ILM_L6_B1	Quartet
R_ILM_L6_B1_M8_1	R	RiboZ	ILM	L6	B1	M8	1	R_ILM_L6_B1	Quartet
R_ILM_L6_B1_M8_2	R	RiboZ	ILM	L6	B1	M8	2	R_ILM_L6_B1	Quartet
R_ILM_L6_B1_M8_3	R	RiboZ	ILM	L6	B1	M8	3	R_ILM_L6_B1	Quartet
R_ILM_L8_B1_D5_1	R	RiboZ	ILM	L8	B1	D5	1	R_ILM_L8_B1	Quartet
R_ILM_L8_B1_D5_2	R	RiboZ	ILM	L8	B1	D5	2	R_ILM_L8_B1	Quartet
R_ILM_L8_B1_D5_3	R	RiboZ	ILM	L8	B1	D5	3	R_ILM_L8_B1	Quartet
R_ILM_L8_B1_D6_1	R	RiboZ	ILM	L8	B1	D6	1	R_ILM_L8_B1	Quartet
R_ILM_L8_B1_D6_2	R	RiboZ	ILM	L8	B1	D6	2	R_ILM_L8_B1	Quartet
R_ILM_L8_B1_D6_3	R	RiboZ	ILM	L8	B1	D6	3	R_ILM_L8_B1	Quartet
R_ILM_L8_B1_F7_1	R	RiboZ	ILM	L8	B1	F7	1	R_ILM_L8_B1	Quartet
R_ILM_L8_B1_F7_2	R	RiboZ	ILM	L8	B1	F7	2	R_ILM_L8_B1	Quartet
R_ILM_L8_B1_F7_3	R	RiboZ	ILM	L8	B1	F7	3	R_ILM_L8_B1	Quartet
R_ILM_L8_B1_M8_1	R	RiboZ	ILM	L8	B1	M8	1	R_ILM_L8_B1	Quartet
R_ILM_L8_B1_M8_2	R	RiboZ	ILM	L8	B1	M8	2	R_ILM_L8_B1	Quartet
R_ILM_L8_B1_M8_3	R	RiboZ	ILM	L8	B1	M8	3	R_ILM_L8_B1	Quartet

## Sheet: Supplementary Table 4
Table S4. Performance metrics overview.
Metrics	D_ONT_LG_B1	D_ONT_LW_B1	I_PAB_LN_B1	I_PAB_LN_B2	M_PAB_LG_B1	M_PAB_LG_B2	M_PAB_LN_B1	P_ONT_LB_B1	P_ONT_LG_B1	P_ONT_LG_B2	P_ONT_LN_B1	P_ONT_LN_B2
Total bases (G)	17.43 ± 3.81	23.16 ± 2.33	2.22 ± 0.42	1.09 ± 0.32	12.96 ± 1.18	13.41 ± 0.42	14.30 ± 1.06	6.96 ± 0.39	8.54 ± 0.60	6.69 ± 0.55	7.55 ± 0.76	6.45 ± 0.44
Total reads (M)	15.04 ± 3.02	18.44 ± 1.67	0.65 ± 0.10	0.42 ± 0.12	7.36 ± 0.76	8.35 ± 0.58	7.20 ± 0.64	5.76 ± 0.45	7.54 ± 0.70	6.04 ± 0.39	6.93 ± 0.79	4.63 ± 0.23
Read length (nt)	1155.0 ± 33.4	1257.8 ± 82.8	3419.2 ± 218.5	2565.4 ± 67.4	1764.9 ± 100.4	1611.8 ± 99.4	1987.9 ± 59.8	1210.5 ± 56.9	1136.8 ± 58.6	1108.0 ± 52.4	1095.2 ± 100.1	1392.2 ± 49.9
Read quality (Q-score)	16.76 ± 0.34	16.73 ± 0.34	31.44 ± 0.30	32.30 ± 0.29	25.67 ± 0.40	23.65 ± 0.16	24.44 ± 1.09	12.86 ± 0.05	10.59 ± 0.08	10.33 ± 0.09	12.11 ± 0.33	12.47 ± 0.12
Primary mapping ratio%	98.39 ± 0.50	96.73 ± 1.70	99.97 ± 0.01	99.96 ± 0.03	99.18 ± 0.60	98.64 ± 0.63	98.11 ± 0.29	99.79 ± 0.02	98.43 ± 0.70	99.09 ± 0.49	95.63 ± 1.29	97.46 ± 0.33
Primary mapped reads (M)	14.80 ± 2.98	17.85 ± 1.78	0.65 ± 0.10	0.42 ± 0.12	7.30 ± 0.72	8.24 ± 0.60	7.07 ± 0.62	5.05 ± 0.41	6.39 ± 0.58	4.80 ± 0.31	4.64 ± 0.56	3.66 ± 0.23
5'-3' coverage bias	0.77 ± 0.01	0.81 ± 0.02	0.70 ± 0.06	0.69 ± 0.05	0.57 ± 0.06	0.65 ± 0.02	0.41 ± 0.03	0.96 ± 0.01	0.98 ± 0.01	0.97 ± 0.01	0.86 ± 0.04	0.85 ± 0.01
Duplication rate%	28.52 ± 0.79	27.90 ± 0.99	27.68 ± 0.57	27.46 ± 0.38	26.86 ± 1.21	26.69 ± 0.40	25.53 ± 1.41	25.48 ± 0.73	24.77 ± 1.16	24.45 ± 0.67	26.11 ± 7.70	23.14 ± 1.04
TSS ratio%	1.33 ± 0.10	1.39 ± 0.06	0.49 ± 0.07	0.54 ± 0.07	0.72 ± 0.05	0.58 ± 0.06	0.68 ± 0.03	0.39 ± 0.03	0.70 ± 0.05	0.56 ± 0.08	0.64 ± 0.08	0.54 ± 0.08
Exonic ratio%	73.48 ± 1.01	73.28 ± 0.86	88.83 ± 1.37	92.35 ± 0.62	72.65 ± 0.59	80.27 ± 1.74	80.58 ± 0.97	93.48 ± 0.28	82.94 ± 0.40	83.40 ± 1.44	78.57 ± 3.62	78.76 ± 2.58
Intronic ratio	24.66 ± 0.91	24.75 ± 0.84	9.92 ± 1.29	6.55 ± 0.54	26.03 ± 0.57	18.09 ± 1.68	18.31 ± 0.94	5.54 ± 0.27	16.03 ± 0.39	15.07 ± 1.35	19.61 ± 3.48	19.56 ± 2.45
TES ratio%	0.53 ± 0.05	0.57 ± 0.04	0.76 ± 0.04	0.56 ± 0.04	0.59 ± 0.05	1.05 ± 0.04	0.42 ± 0.06	0.59 ± 0.03	0.33 ± 0.03	0.97 ± 0.06	1.18 ± 0.10	1.13 ± 0.11
Junctioin consistency annotated	0.776 ± 0.005	0.787 ± 0.005	0.783 ± 0.004	0.768 ± 0.010	0.771 ± 0.003	0.773 ± 0.004	0.787 ± 0.007	0.756 ± 0.004	0.763 ± 0.006	0.756 ± 0.004	0.758 ± 0.007	0.767 ± 0.006
Junctioin consistency complete novel	0.133 ± 0.013	0.153 ± 0.008	0.318 ± 0.013	0.439 ± 0.022	0.162 ± 0.019	0.150 ± 0.011	0.227 ± 0.007	0.100 ± 0.003	0.101 ± 0.003	0.087 ± 0.008	0.074 ± 0.004	0.071 ± 0.002
Junctioin consistency partial novel	0.270 ± 0.006	0.294 ± 0.006	0.241 ± 0.005	0.189 ± 0.011	0.237 ± 0.017	0.237 ± 0.012	0.322 ± 0.003	0.210 ± 0.003	0.226 ± 0.003	0.219 ± 0.005	0.172 ± 0.006	0.188 ± 0.004
Jaccard gene	0.911 ± 0.007	0.915 ± 0.004	0.844 ± 0.013	0.806 ± 0.035	0.899 ± 0.013	0.910 ± 0.003	0.910 ± 0.004	0.868 ± 0.008	0.878 ± 0.006	0.881 ± 0.004	0.851 ± 0.029	0.883 ± 0.003
Jaccard isoform	0.731 ± 0.011	0.740 ± 0.005	0.651 ± 0.012	0.596 ± 0.022	0.710 ± 0.018	0.727 ± 0.003	0.737 ± 0.005	0.632 ± 0.008	0.653 ± 0.007	0.635 ± 0.007	0.605 ± 0.041	0.643 ± 0.003
Jaccard AS	0.568 ± 0.015	0.581 ± 0.007	0.472 ± 0.013	0.397 ± 0.024	0.527 ± 0.024	0.554 ± 0.004	0.568 ± 0.006	0.448 ± 0.009	0.474 ± 0.007	0.447 ± 0.007	0.416 ± 0.046	0.456 ± 0.004
PCC gene	0.998 ± 0.002	0.997 ± 0.003	0.935 ± 0.041	0.982 ± 0.014	0.953 ± 0.039	0.985 ± 0.014	0.990 ± 0.007	0.976 ± 0.019	0.989 ± 0.007	0.995 ± 0.004	0.855 ± 0.180	0.998 ± 0.001
PCC isoform	0.997 ± 0.002	0.996 ± 0.003	0.933 ± 0.041	0.982 ± 0.014	0.954 ± 0.038	0.985 ± 0.014	0.990 ± 0.007	0.972 ± 0.022	0.986 ± 0.010	0.995 ± 0.004	0.840 ± 0.193	0.998 ± 0.001
PCC AS	0.823 ± 0.021	0.835 ± 0.013	0.791 ± 0.021	0.766 ± 0.030	0.788 ± 0.040	0.819 ± 0.006	0.823 ± 0.006	0.755 ± 0.015	0.771 ± 0.012	0.766 ± 0.015	0.734 ± 0.048	0.778 ± 0.008
SNR gene	34.16	34.27	2.72	2.13	0.53	15.89	15.96	6.08	21.6	21.3	1.15	31.14
SNR isoform	14.39	19.2	2.11	1.64	0.16	15.07	12.78	2.08	13.36	19.38	0.09	26.53
SNR AS	9.2	11.43	1.36	1.87	0.64	15.49	12.47	1.78	6.8	10.97	-0.02	18.39

## Sheet: Supplementary Table 5
Table S5. Ratio-based isoform reference datasets.
isoform	compare	Freq	fc	log2FC	uncertainty	isoform_compare	medianp	gene_id	gene_name	gene_type	transcript_name	transcript_type	transcript_length	exon_count	junction_count	classification
ENST00000000412.8	D5/D6	3	1.08482	0.117127	1.50735	ENST00000000412.8 D5/D6	0.0277508	ENSG00000003056.8	M6PR	protein_coding	M6PR-201	protein_coding	2450	7	6	High Confidence
ENST00000000412.8	F7/D6	3	0.839804	-0.253989	3.86152	ENST00000000412.8 F7/D6	0.00194799	ENSG00000003056.8	M6PR	protein_coding	M6PR-201	protein_coding	2450	7	6	Low Confidence
ENST00000001008.6	M8/D6	2	0.855567	-0.225049	0.151626	ENST00000001008.6 M8/D6	0.0163064	ENSG00000004478.8	FKBP4	protein_coding	FKBP4-201	protein_coding	3715	10	9	Low Confidence
ENST00000002165.11	D5/D6	4	0.727293	-0.459469	0.600953	ENST00000002165.11 D5/D6	0.0114198	ENSG00000001036.14	FUCA2	protein_coding	FUCA2-201	protein_coding	2385	7	6	High Confidence
ENST00000002165.11	M8/D6	2	0.856085	-0.224278	1.20028	ENST00000002165.11 M8/D6	0.0396799	ENSG00000001036.14	FUCA2	protein_coding	FUCA2-201	protein_coding	2385	7	6	Low Confidence
ENST00000002596.6	M8/D6	2	2.44597	1.28883	4.67578	ENST00000002596.6 M8/D6	0.0143865	ENSG00000002587.10	HS3ST1	protein_coding	HS3ST1-201	protein_coding	7160	2	1	Low Confidence
ENST00000003100.13	M8/D6	4	1.39081	0.46861	5.88788	ENST00000003100.13 M8/D6	0.0295281	ENSG00000001630.18	CYP51A1	protein_coding	CYP51A1-201	protein_coding	3155	10	9	Low Confidence
ENST00000005257.7	D5/D6	2	0.844148	-0.244528	1.15608	ENST00000005257.7 D5/D6	0.037433	ENSG00000006451.8	RALA	protein_coding	RALA-201	protein_coding	2787	5	4	Low Confidence
ENST00000005257.7	F7/D6	2	1.16197	0.216572	0.0184191	ENST00000005257.7 F7/D6	0.0842261	ENSG00000006451.8	RALA	protein_coding	RALA-201	protein_coding	2787	5	4	Low Confidence
ENST00000005259.9	M8/D6	2	1.31376	0.393047	3	ENST00000005259.9 M8/D6	0.0341753	ENSG00000075790.12	BCAP29	protein_coding	BCAP29-201	protein_coding	2911	8	7	Medium Confidence
ENST00000005260.9	D5/D6	3	1.52155	0.592737	9.22835	ENST00000005260.9 D5/D6	0.00370092	ENSG00000006453.14	BAIAP2L1	protein_coding	BAIAP2L1-201	protein_coding	3645	14	13	Low Confidence
ENST00000005260.9	F7/D6	3	2.23632	1.15207	7.71821	ENST00000005260.9 F7/D6	0.000330259	ENSG00000006453.14	BAIAP2L1	protein_coding	BAIAP2L1-201	protein_coding	3645	14	13	Low Confidence
ENST00000006750.8	D5/D6	2	0.776657	-0.36471	0.898285	ENST00000006750.8 D5/D6	0.00679166	ENSG00000007312.14	CD79B	protein_coding	CD79B-201	protein_coding	1246	6	5	Low Confidence
ENST00000006750.8	M8/D6	2	1.34728	0.429477	2.80956	ENST00000006750.8 M8/D6	0.0094599	ENSG00000007312.14	CD79B	protein_coding	CD79B-201	protein_coding	1246	6	5	Medium Confidence
ENST00000006777.11	D5/D6	3	0.528709	-0.919688	1.27053	ENST00000006777.11 D5/D6	0.000951731	ENSG00000005486.17	RHBDD2	protein_coding	RHBDD2-201	protein_coding	1721	4	3	High Confidence
ENST00000007390.3	M8/D6	2	0.789886	-0.34047	1.60835	ENST00000007390.3 M8/D6	0.13702	ENSG00000007520.4	TSR3	protein_coding	TSR3-201	protein_coding	1210	6	5	Low Confidence
ENST00000007516.8	M8/D6	3	0.832938	-0.263784	0.66528	ENST00000007516.8 M8/D6	0.0456485	ENSG00000004779.10	NDUFAB1	protein_coding	NDUFAB1-201	protein_coding	665	5	4	High Confidence
ENST00000008527.10	D5/D6	4	5.30361	2.40613	1.98353	ENST00000008527.10 D5/D6	2.55962e-06	ENSG00000008405.12	CRY1	protein_coding	CRY1-201	protein_coding	2987	13	12	Medium Confidence
ENST00000008527.10	F7/D6	4	2.81083	1.48927	2.8384	ENST00000008527.10 F7/D6	0.000102529	ENSG00000008405.12	CRY1	protein_coding	CRY1-201	protein_coding	2987	13	12	Medium Confidence
ENST00000008527.10	M8/D6	2	1.38179	0.46634	1.6619	ENST00000008527.10 M8/D6	0.0605176	ENSG00000008405.12	CRY1	protein_coding	CRY1-201	protein_coding	2987	13	12	Low Confidence
ENST00000009530.13	D5/D6	3	0.488797	-1.03597	4.70707	ENST00000009530.13 D5/D6	3.5203e-07	ENSG00000019582.17	CD74	protein_coding	CD74-201	protein_coding	1653	9	8	Low Confidence
ENST00000009530.13	F7/D6	3	0.72614	-0.461684	0.18205	ENST00000009530.13 F7/D6	0.000130991	ENSG00000019582.17	CD74	protein_coding	CD74-201	protein_coding	1653	9	8	High Confidence
ENST00000009530.13	M8/D6	2	0.849151	-0.236727	3.36983	ENST00000009530.13 M8/D6	0.0311925	ENSG00000019582.17	CD74	protein_coding	CD74-201	protein_coding	1653	9	8	Medium Confidence
ENST00000009589.8	D5/D6	2	1.09748	0.133769	2.43609	ENST00000009589.8 D5/D6	0.0473979	ENSG00000008988.11	RPS20	protein_coding	RPS20-201	protein_coding	519	4	3	Medium Confidence
ENST00000009589.8	F7/D6	3	1.14583	0.196349	0.51058	ENST00000009589.8 F7/D6	0.0590598	ENSG00000008988.11	RPS20	protein_coding	RPS20-201	protein_coding	519	4	3	High Confidence
ENST00000011619.6	D5/D6	2	0.91361	-0.13093	2.8352	ENST00000011619.6 D5/D6	0.336387	ENSG00000010017.13	RANBP9	protein_coding	RANBP9-201	protein_coding	3384	14	13	Medium Confidence
ENST00000012443.9	M8/D6	2	0.89859	-0.154281	0.469982	ENST00000012443.9 M8/D6	0.357051	ENSG00000011485.15	PPP5C	protein_coding	PPP5C-201	protein_coding	2139	13	12	Low Confidence
ENST00000013070.11	D5/D6	3	0.843628	-0.245416	0.808247	ENST00000013070.11 D5/D6	0.035927	ENSG00000012963.15	UBR7	protein_coding	UBR7-201	protein_coding	3494	11	10	High Confidence
ENST00000013070.11	M8/D6	4	1.47638	0.561895	0.882216	ENST00000013070.11 M8/D6	0.00770547	ENSG00000012963.15	UBR7	protein_coding	UBR7-201	protein_coding	3494	11	10	High Confidence
ENST00000014914.6	D5/D6	2	0.600698	-0.735555	1.92069	ENST00000014914.6 D5/D6	0.051051	ENSG00000013588.9	GPRC5A	protein_coding	GPRC5A-201	protein_coding	6582	4	3	Medium Confidence
ENST00000014914.6	M8/D6	2	0.550332	-0.861892	1.92368	ENST00000014914.6 M8/D6	0.0544927	ENSG00000013588.9	GPRC5A	protein_coding	GPRC5A-201	protein_coding	6582	4	3	Medium Confidence
ENST00000014930.9	D5/D6	4	2.25242	1.1714	0.605729	ENST00000014930.9 D5/D6	0.00944635	ENSG00000013583.10	HEBP1	protein_coding	HEBP1-201	protein_coding	1159	4	3	High Confidence
ENST00000014930.9	M8/D6	4	2.24321	1.16511	1.43075	ENST00000014930.9 M8/D6	0.0145739	ENSG00000013583.10	HEBP1	protein_coding	HEBP1-201	protein_coding	1159	4	3	High Confidence
ENST00000028008.9	F7/D6	2	0.657989	-0.617254	13.5607	ENST00000028008.9 F7/D6	0.0270441	ENSG00000026297.17	RNASET2	protein_coding	RNASET2-201	nonsense_mediated_decay	1220	9	8	Low Confidence
ENST00000033079.7	F7/D6	2	0.836624	-0.278856	17.1394	ENST00000033079.7 F7/D6	0.2243	ENSG00000031003.11	FAM13B	protein_coding	FAM13B-201	protein_coding	5465	23	22	Low Confidence
ENST00000037869.8	D5/D6	3	1.25117	0.323163	0.895113	ENST00000037869.8 D5/D6	0.0121247	ENSG00000035141.9	FAM136A	protein_coding	FAM136A-201	protein_coding	1786	3	2	High Confidence
ENST00000038176.8	D5/D6	3	1.23859	0.308606	0.793656	ENST00000038176.8 D5/D6	0.0201241	ENSG00000035681.9	NSMAF	protein_coding	NSMAF-201	protein_coding	3574	31	30	High Confidence
ENST00000040738.10	D5/D6	2	1.23706	0.306898	0.553723	ENST00000040738.10 D5/D6	0.129693	ENSG00000038219.13	BOD1L1	protein_coding	BOD1L1-201	protein_coding	10567	26	25	Low Confidence
ENST00000040877.2	D5/D6	3	1.41571	0.501341	1.14144	ENST00000040877.2 D5/D6	0.0172637	ENSG00000059588.10	TARBP1	protein_coding	TARBP1-201	protein_coding	5206	30	29	High Confidence
ENST00000044462.12	F7/D6	2	0.745739	-0.423384	1.32283	ENST00000044462.12 F7/D6	0.000480426	ENSG00000041357.16	PSMA4	protein_coding	PSMA4-201	protein_coding	4378	9	8	Low Confidence
ENST00000046794.10	D5/D6	3	1.23662	0.306388	0.335929	ENST00000046794.10 D5/D6	0.0681933	ENSG00000043462.13	LCP2	protein_coding	LCP2-201	protein_coding	4232	21	20	High Confidence
ENST00000046794.10	F7/D6	3	1.5633	0.640686	5.11349	ENST00000046794.10 F7/D6	0.000891356	ENSG00000043462.13	LCP2	protein_coding	LCP2-201	protein_coding	4232	21	20	Low Confidence
ENST00000046794.10	M8/D6	3	1.77689	0.828786	1.97559	ENST00000046794.10 M8/D6	0.000755407	ENSG00000043462.13	LCP2	protein_coding	LCP2-201	protein_coding	4232	21	20	Medium Confidence
ENST00000053243.6	D5/D6	4	0.706671	-0.500934	0.455594	ENST00000053243.6 D5/D6	0.000411703	ENSG00000048462.11	TNFRSF17	protein_coding	TNFRSF17-201	protein_coding	891	3	2	High Confidence
ENST00000053243.6	F7/D6	3	0.775098	-0.367661	0.880739	ENST00000053243.6 F7/D6	0.00175313	ENSG00000048462.11	TNFRSF17	protein_coding	TNFRSF17-201	protein_coding	891	3	2	High Confidence
ENST00000053243.6	M8/D6	3	0.751866	-0.411511	0.635883	ENST00000053243.6 M8/D6	0.00117043	ENSG00000048462.11	TNFRSF17	protein_coding	TNFRSF17-201	protein_coding	891	3	2	High Confidence
ENST00000053468.4	F7/D6	3	0.767818	-0.381359	1.16408	ENST00000053468.4 F7/D6	0.00695668	ENSG00000048544.6	MRPS10	protein_coding	MRPS10-201	protein_coding	2100	7	6	High Confidence
ENST00000053468.4	M8/D6	3	1.12931	0.174906	1.90928	ENST00000053468.4 M8/D6	0.101775	ENSG00000048544.6	MRPS10	protein_coding	MRPS10-201	protein_coding	2100	7	6	Medium Confidence
ENST00000053867.8	F7/D6	3	0.855767	-0.224764	0.607644	ENST00000053867.8 F7/D6	0.0102456	ENSG00000030582.18	GRN	protein_coding	GRN-201	protein_coding	2130	13	12	High Confidence
ENST00000053867.8	M8/D6	2	0.929971	-0.104753	0.384802	ENST00000053867.8 M8/D6	0.0463894	ENSG00000030582.18	GRN	protein_coding	GRN-201	protein_coding	2130	13	12	Low Confidence
ENST00000054666.11	D5/D6	2	0.855668	-0.224997	1.28828	ENST00000054666.11 D5/D6	0.395956	ENSG00000049245.13	VAMP3	protein_coding	VAMP3-201	protein_coding	2178	5	4	Low Confidence
ENST00000054950.4	M8/D6	2	0.855701	-0.224844	0.558926	ENST00000054950.4 M8/D6	0.00994865	ENSG00000049449.10	RCN1	protein_coding	RCN1-201	protein_coding	2369	6	5	Low Confidence
ENST00000060969.6	D5/D6	2	1.13719	0.185387	1.05586	ENST00000060969.6 D5/D6	0.185559	ENSG00000052723.12	SIKE1	protein_coding	SIKE1-201	protein_coding	5494	5	4	Low Confidence
ENST00000072644.7	D5/D6	3	0.659058	-0.605593	5.23769	ENST00000072644.7 D5/D6	0.0156054	ENSG00000058799.15	YIPF1	protein_coding	YIPF1-201	protein_coding	1821	11	10	Low Confidence
ENST00000072869.9	D5/D6	2	1.36423	0.447947	1.4047	ENST00000072869.9 D5/D6	0.048008	ENSG00000133597.11	ADCK2	protein_coding	ADCK2-201	protein_coding	2574	8	7	Low Confidence
ENST00000075120.12	F7/D6	3	0.761008	-0.394095	0.740834	ENST00000075120.12 F7/D6	0.0220429	ENSG00000059804.16	SLC2A3	protein_coding	SLC2A3-201	protein_coding	3827	10	9	High Confidence
ENST00000075120.12	M8/D6	4	1.44428	0.52871	2.70738	ENST00000075120.12 M8/D6	0.00305927	ENSG00000059804.16	SLC2A3	protein_coding	SLC2A3-201	protein_coding	3827	10	9	Medium Confidence
ENST00000075322.11	D5/D6	4	0.582923	-0.779605	2.10523	ENST00000075322.11 D5/D6	0.00301561	ENSG00000136960.13	ENPP2	protein_coding	ENPP2-201	protein_coding	3086	25	24	Medium Confidence
ENST00000075322.11	F7/D6	4	0.358986	-1.47819	0.93733	ENST00000075322.11 F7/D6	0.00031278	ENSG00000136960.13	ENPP2	protein_coding	ENPP2-201	protein_coding	3086	25	24	High Confidence
ENST00000075322.11	M8/D6	4	0.545496	-0.874456	0.670428	ENST00000075322.11 M8/D6	0.00298549	ENSG00000136960.13	ENPP2	protein_coding	ENPP2-201	protein_coding	3086	25	24	High Confidence
ENST00000081029.8	D5/D6	3	1.15877	0.212481	0.876041	ENST00000081029.8 D5/D6	0.0322918	ENSG00000061794.13	MRPS35	protein_coding	MRPS35-201	protein_coding	1829	8	7	High Confidence
ENST00000081029.8	M8/D6	3	0.864965	-0.209287	0.0358261	ENST00000081029.8 M8/D6	0.0300054	ENSG00000061794.13	MRPS35	protein_coding	MRPS35-201	protein_coding	1829	8	7	High Confidence
ENST00000085219.10	D5/D6	3	1.66334	0.733895	1.13945	ENST00000085219.10 D5/D6	3.40479e-06	ENSG00000012124.17	CD22	protein_coding	CD22-201	protein_coding	3274	14	13	High Confidence
ENST00000085219.10	F7/D6	3	1.1675	0.222899	1.91393	ENST00000085219.10 F7/D6	0.0191307	ENSG00000012124.17	CD22	protein_coding	CD22-201	protein_coding	3274	14	13	Medium Confidence
ENST00000085219.10	M8/D6	3	1.53257	0.615812	0.992995	ENST00000085219.10 M8/D6	4.8606e-05	ENSG00000012124.17	CD22	protein_coding	CD22-201	protein_coding	3274	14	13	High Confidence
ENST00000156471.10	D5/D6	2	1.25742	0.330447	0.458195	ENST00000156471.10 D5/D6	0.0446417	ENSG00000021776.11	AQR	protein_coding	AQR-201	protein_coding	9597	35	34	Low Confidence
ENST00000157600.8	M8/D6	2	1.51846	0.602309	2.04053	ENST00000157600.8 M8/D6	0.0817598	ENSG00000071282.12	LMCD1	protein_coding	LMCD1-201	protein_coding	8284	6	5	Medium Confidence
ENST00000158762.8	D5/D6	2	1.11758	0.160362	0.438826	ENST00000158762.8 D5/D6	0.0885793	ENSG00000072818.12	ACAP1	protein_coding	ACAP1-201	protein_coding	2511	22	21	Low Confidence
ENST00000158771.9	D5/D6	3	0.796	-0.329306	1.01408	ENST00000158771.9 D5/D6	0.010401	ENSG00000072849.11	DERL2	protein_coding	DERL2-201	protein_coding	4167	7	6	High Confidence
ENST00000158771.9	M8/D6	2	0.810443	-0.303311	1.13956	ENST00000158771.9 M8/D6	0.0379175	ENSG00000072849.11	DERL2	protein_coding	DERL2-201	protein_coding	4167	7	6	Low Confidence
ENST00000160262.10	F7/D6	3	1.41469	0.500039	1.76029	ENST00000160262.10 F7/D6	0.00148412	ENSG00000076662.11	ICAM3	protein_coding	ICAM3-201	protein_coding	1735	7	6	High Confidence
ENST00000160827.9	D5/D6	3	1.59707	0.675298	0.94786	ENST00000160827.9 D5/D6	0.0152511	ENSG00000079616.14	KIF22	protein_coding	KIF22-201	protein_coding	2081	14	13	High Confidence
ENST00000160827.9	M8/D6	4	2.81033	1.48836	3.27477	ENST00000160827.9 M8/D6	0.000119753	ENSG00000079616.14	KIF22	protein_coding	KIF22-201	protein_coding	2081	14	13	Medium Confidence
ENST00000162749.7	M8/D6	3	1.43462	0.520171	1.844	ENST00000162749.7 M8/D6	0.0263065	ENSG00000067182.9	TNFRSF1A	protein_coding	TNFRSF1A-201	protein_coding	2171	10	9	Medium Confidence
ENST00000164133.7	D5/D6	3	0.540876	-0.887004	1.61364	ENST00000164133.7 D5/D6	0.0103071	ENSG00000068971.14	PPP2R5B	protein_coding	PPP2R5B-201	protein_coding	2729	14	13	High Confidence
ENST00000164227.10	D5/D6	3	0.464952	-1.1057	2.44661	ENST00000164227.10 D5/D6	0.00592511	ENSG00000069399.15	BCL3	protein_coding	BCL3-201	protein_coding	1877	9	8	Medium Confidence
ENST00000168216.11	D5/D6	2	1.23736	0.307198	0.965283	ENST00000168216.11 D5/D6	0.0566887	ENSG00000072506.14	HSD17B10	protein_coding	HSD17B10-201	protein_coding	954	6	5	Low Confidence
ENST00000168977.7	D5/D6	3	2.61958	1.38823	2.75622	ENST00000168977.7 D5/D6	0.00218205	ENSG00000077009.14	NMRK2	protein_coding	NMRK2-201	protein_coding	1160	8	7	Medium Confidence
ENST00000168977.7	F7/D6	3	2.17659	1.12175	1.48331	ENST00000168977.7 F7/D6	0.00679763	ENSG00000077009.14	NMRK2	protein_coding	NMRK2-201	protein_coding	1160	8	7	High Confidence
ENST00000168977.7	M8/D6	3	3.01864	1.59355	1.54613	ENST00000168977.7 M8/D6	0.00101295	ENSG00000077009.14	NMRK2	protein_coding	NMRK2-201	protein_coding	1160	8	7	High Confidence
ENST00000169298.8	F7/D6	2	0.529345	-0.917724	0.216631	ENST00000169298.8 F7/D6	0.0115268	ENSG00000073849.16	ST6GAL1	protein_coding	ST6GAL1-201	protein_coding	4604	8	7	Low Confidence
ENST00000171111.10	F7/D6	2	0.623562	-0.682139	3.20944	ENST00000171111.10 F7/D6	0.0258557	ENSG00000079999.14	KEAP1	protein_coding	KEAP1-201	protein_coding	2565	6	5	Medium Confidence
ENST00000171111.10	M8/D6	2	0.653012	-0.615551	3.18584	ENST00000171111.10 M8/D6	0.0316248	ENSG00000079999.14	KEAP1	protein_coding	KEAP1-201	protein_coding	2565	6	5	Medium Confidence
ENST00000171757.3	D5/D6	3	0.577649	-0.792124	1.63432	ENST00000171757.3 D5/D6	0.00108893	ENSG00000078589.13	P2RY10	protein_coding	P2RY10-201	protein_coding	3517	4	3	High Confidence
ENST00000173527.6	D5/D6	3	0.858877	-0.219483	0.214298	ENST00000173527.6 D5/D6	0.0285394	ENSG00000066583.12	ISOC1	protein_coding	ISOC1-201	protein_coding	1942	5	4	High Confidence
ENST00000173527.6	M8/D6	3	0.835619	-0.259109	0.43147	ENST00000173527.6 M8/D6	0.148797	ENSG00000066583.12	ISOC1	protein_coding	ISOC1-201	protein_coding	1942	5	4	High Confidence
ENST00000174618.5	D5/D6	2	1.37488	0.459244	0.924427	ENST00000174618.5 D5/D6	0.0857808	ENSG00000070444.15	MNT	protein_coding	MNT-201	protein_coding	4925	6	5	Low Confidence
ENST00000175091.5	D5/D6	4	0.816477	-0.29252	0.138292	ENST00000175091.5 D5/D6	0.00570739	ENSG00000068697.7	LAPTM4A	protein_coding	LAPTM4A-201	protein_coding	1365	7	6	High Confidence
ENST00000175091.5	M8/D6	2	0.885504	-0.175432	0.20899	ENST00000175091.5 M8/D6	0.0582394	ENSG00000068697.7	LAPTM4A	protein_coding	LAPTM4A-201	protein_coding	1365	7	6	Low Confidence
ENST00000175506.8	D5/D6	3	0.621858	-0.685764	1.70711	ENST00000175506.8 D5/D6	0.019196	ENSG00000070669.17	ASNS	protein_coding	ASNS-201	protein_coding	2356	14	13	High Confidence
ENST00000175506.8	F7/D6	3	2.77785	1.47229	3.42852	ENST00000175506.8 F7/D6	3.46567e-05	ENSG00000070669.17	ASNS	protein_coding	ASNS-201	protein_coding	2356	14	13	Medium Confidence
ENST00000175506.8	M8/D6	3	1.92004	0.938964	3.92673	ENST00000175506.8 M8/D6	0.00107998	ENSG00000070669.17	ASNS	protein_coding	ASNS-201	protein_coding	2356	14	13	Low Confidence
ENST00000175756.10	D5/D6	2	1.31343	0.393054	2.00048	ENST00000175756.10 D5/D6	0.0175364	ENSG00000072135.13	PTPN18	protein_coding	PTPN18-201	protein_coding	3616	15	14	Medium Confidence
ENST00000175756.10	M8/D6	2	1.20868	0.273198	1.78221	ENST00000175756.10 M8/D6	0.0574975	ENSG00000072135.13	PTPN18	protein_coding	PTPN18-201	protein_coding	3616	15	14	Low Confidence
ENST00000176643.11	M8/D6	2	0.686668	-0.542372	0.880104	ENST00000176643.11 M8/D6	0.0307271	ENSG00000072210.19	ALDH3A2	protein_coding	ALDH3A2-201	protein_coding	3703	10	9	Low Confidence
ENST00000176763.10	D5/D6	3	1.24801	0.318053	3.33154	ENST00000176763.10 D5/D6	0.00351269	ENSG00000072786.13	STK10	protein_coding	STK10-201	protein_coding	5892	19	18	Medium Confidence
ENST00000177648.13	D5/D6	2	0.38711	-1.37072	4.60822	ENST00000177648.13 D5/D6	0.0119129	ENSG00000073331.18	ALPK1	protein_coding	ALPK1-201	protein_coding	4537	16	15	Low Confidence
ENST00000177694.2	F7/D6	2	0.40078	-1.32056	4.46579	ENST00000177694.2 F7/D6	0.0117434	ENSG00000073861.3	TBX21	protein_coding	TBX21-201	protein_coding	2583	6	5	Low Confidence
ENST00000182527.4	D5/D6	3	1.25936	0.332448	1.30267	ENST00000182527.4 D5/D6	0.0473799	ENSG00000065308.5	TRAM2	protein_coding	TRAM2-201	protein_coding	7047	11	10	High Confidence
ENST00000182527.4	M8/D6	3	0.655141	-0.610296	1.09656	ENST00000182527.4 M8/D6	0.00925433	ENSG00000065308.5	TRAM2	protein_coding	TRAM2-201	protein_coding	7047	11	10	High Confidence
ENST00000184266.3	D5/D6	2	0.791673	-0.337029	0.266481	ENST00000184266.3 D5/D6	0.0100511	ENSG00000065518.8	NDUFB4	protein_coding	NDUFB4-201	protein_coding	651	3	2	Low Confidence
ENST00000185150.9	D5/D6	2	0.780999	-0.357068	2.52554	ENST00000185150.9 D5/D6	0.0294866	ENSG00000068912.15	ERLEC1	protein_coding	ERLEC1-201	protein_coding	2446	14	13	Medium Confidence
ENST00000185150.9	M8/D6	2	0.794598	-0.33181	1.21259	ENST00000185150.9 M8/D6	0.0940049	ENSG00000068912.15	ERLEC1	protein_coding	ERLEC1-201	protein_coding	2446	14	13	Low Confidence
ENST00000186436.10	D5/D6	3	0.754965	-0.407337	3.57708	ENST00000186436.10 D5/D6	0.0476497	ENSG00000075568.17	TMEM131	protein_coding	TMEM131-201	protein_coding	6701	41	40	Medium Confidence
ENST00000187762.7	F7/D6	2	0.816884	-0.291803	0.29932	ENST00000187762.7 F7/D6	0.0814666	ENSG00000072954.7	TMEM38A	protein_coding	TMEM38A-201	protein_coding	2631	6	5	Low Confidence
ENST00000187762.7	M8/D6	4	0.649994	-0.622242	1.84739	ENST00000187762.7 M8/D6	0.0114485	ENSG00000072954.7	TMEM38A	protein_coding	TMEM38A-201	protein_coding	2631	6	5	Medium Confidence
ENST00000188376.9	D5/D6	2	1.16124	0.215634	0.628487	ENST00000188376.9 D5/D6	0.346339	ENSG00000075415.15	SLC25A3	protein_coding	SLC25A3-201	protein_coding	1909	7	6	Low Confidence
ENST00000188376.9	M8/D6	2	0.724247	-0.46865	6.6568	ENST00000188376.9 M8/D6	0.0361821	ENSG00000075415.15	SLC25A3	protein_coding	SLC25A3-201	protein_coding	1909	7	6	Low Confidence
ENST00000191018.9	D5/D6	3	1.54936	0.631514	1.04993	ENST00000191018.9 D5/D6	0.0415813	ENSG00000064601.21	CTSA	protein_coding	CTSA-201	protein_coding	1898	15	14	High Confidence
ENST00000193403.10	D5/D6	3	2.3418	1.22396	4.99324	ENST00000193403.10 D5/D6	0.00127319	ENSG00000072110.16	ACTN1	protein_coding	ACTN1-201	protein_coding	3779	21	20	Low Confidence
ENST00000193403.10	M8/D6	2	1.64013	0.713453	2.23454	ENST00000193403.10 M8/D6	0.0368224	ENSG00000072110.16	ACTN1	protein_coding	ACTN1-201	protein_coding	3779	21	20	Medium Confidence
ENST00000194214.10	D5/D6	4	0.864856	-0.210099	1.69147	ENST00000194214.10 D5/D6	0.212426	ENSG00000081870.12	HSPB11	protein_coding	HSPB11-201	protein_coding	685	6	5	High Confidence
ENST00000194214.10	F7/D6	3	0.812699	-0.29928	0.70432	ENST00000194214.10 F7/D6	0.00891113	ENSG00000081870.12	HSPB11	protein_coding	HSPB11-201	protein_coding	685	6	5	High Confidence
ENST00000194214.10	M8/D6	3	0.780781	-0.357196	1.13147	ENST00000194214.10 M8/D6	0.0127279	ENSG00000081870.12	HSPB11	protein_coding	HSPB11-201	protein_coding	685	6	5	High Confidence
ENST00000194530.8	D5/D6	2	1.34301	0.425383	1.09335	ENST00000194530.8 D5/D6	0.014487	ENSG00000082146.13	STRADB	protein_coding	STRADB-201	protein_coding	2222	12	11	Low Confidence
ENST00000194530.8	F7/D6	3	1.30838	0.38617	3.30861	ENST00000194530.8 F7/D6	0.0216525	ENSG00000082146.13	STRADB	protein_coding	STRADB-201	protein_coding	2222	12	11	Medium Confidence
ENST00000194530.8	M8/D6	3	0.70903	-0.498114	3.78633	ENST00000194530.8 M8/D6	0.0609649	ENSG00000082146.13	STRADB	protein_coding	STRADB-201	protein_coding	2222	12	11	Low Confidence
ENST00000196061.5	D5/D6	2	0.864572	-0.209944	0.1901	ENST00000196061.5 D5/D6	0.0523806	ENSG00000083444.17	PLOD1	protein_coding	PLOD1-201	protein_coding	2976	19	18	Low Confidence
ENST00000196551.8	D5/D6	3	1.33217	0.413743	0.518875	ENST00000196551.8 D5/D6	2.4849e-05	ENSG00000083845.9	RPS5	protein_coding	RPS5-201	protein_coding	741	6	5	High Confidence
ENST00000196551.8	F7/D6	3	0.776616	-0.364777	0.595782	ENST00000196551.8 F7/D6	0.000707396	ENSG00000083845.9	RPS5	protein_coding	RPS5-201	protein_coding	741	6	5	High Confidence
ENST00000196551.8	M8/D6	3	0.822108	-0.282611	0.260182	ENST00000196551.8 M8/D6	0.00430699	ENSG00000083845.9	RPS5	protein_coding	RPS5-201	protein_coding	741	6	5	High Confidence
ENST00000198536.7	D5/D6	3	0.545002	-0.875722	0.616937	ENST00000198536.7 D5/D6	0.000294263	ENSG00000085514.16	PILRA	protein_coding	PILRA-201	protein_coding	1271	7	6	High Confidence
ENST00000198536.7	F7/D6	3	0.862518	-0.213506	0.965217	ENST00000198536.7 F7/D6	0.134701	ENSG00000085514.16	PILRA	protein_coding	PILRA-201	protein_coding	1271	7	6	High Confidence
ENST00000198536.7	M8/D6	3	2.03961	1.02801	1.39608	ENST00000198536.7 M8/D6	0.000265636	ENSG00000085514.16	PILRA	protein_coding	PILRA-201	protein_coding	1271	7	6	High Confidence
ENST00000198767.11	D5/D6	2	1.0224	0.0313298	2.94501	ENST00000198767.11 D5/D6	0.268959	ENSG00000085721.13	RRN3	protein_coding	RRN3-201	protein_coding	3706	18	17	Medium Confidence
ENST00000198767.11	M8/D6	4	0.769942	-0.377908	1.85306	ENST00000198767.11 M8/D6	0.0196211	ENSG00000085721.13	RRN3	protein_coding	RRN3-201	protein_coding	3706	18	17	Medium Confidence
ENST00000199320.9	D5/D6	3	1.38103	0.465725	0.352821	ENST00000199320.9 D5/D6	0.00608149	ENSG00000086189.11	DIMT1	protein_coding	DIMT1-201	protein_coding	2831	12	11	High Confidence
ENST00000199389.11	M8/D6	3	0.798099	-0.325528	1.07941	ENST00000199389.11 M8/D6	0.0100253	ENSG00000086232.13	EIF2AK1	protein_coding	EIF2AK1-201	protein_coding	4411	15	14	High Confidence
ENST00000199448.9	F7/D6	2	1.59725	0.675292	2.01821	ENST00000199448.9 F7/D6	0.021441	ENSG00000086289.13	EPDR1	protein_coding	EPDR1-201	protein_coding	2515	3	2	Medium Confidence
ENST00000199448.9	M8/D6	4	2.12039	1.08135	3.70267	ENST00000199448.9 M8/D6	0.000608068	ENSG00000086289.13	EPDR1	protein_coding	EPDR1-201	protein_coding	2515	3	2	Medium Confidence
ENST00000199706.13	D5/D6	2	0.943513	-0.0838955	0.365283	ENST00000199706.13 D5/D6	0.0489981	ENSG00000086504.18	MRPL28	protein_coding	MRPL28-201	protein_coding	1524	6	5	Low Confidence
ENST00000200453.6	D5/D6	3	0.733736	-0.447632	2.57901	ENST00000200453.6 D5/D6	0.00316342	ENSG00000087074.9	PPP1R15A	protein_coding	PPP1R15A-201	protein_coding	2350	3	2	Medium Confidence
ENST00000200453.6	M8/D6	3	0.871991	-0.19906	3.13162	ENST00000200453.6 M8/D6	0.0198335	ENSG00000087074.9	PPP1R15A	protein_coding	PPP1R15A-201	protein_coding	2350	3	2	Medium Confidence
ENST00000200457.9	D5/D6	3	1.27958	0.355662	0.28115	ENST00000200457.9 D5/D6	0.0322242	ENSG00000087077.14	TRIP6	protein_coding	TRIP6-201	protein_coding	1693	9	8	High Confidence
ENST00000200457.9	M8/D6	3	1.33584	0.417731	0.337635	ENST00000200457.9 M8/D6	0.00573577	ENSG00000087077.14	TRIP6	protein_coding	TRIP6-201	protein_coding	1693	9	8	High Confidence
ENST00000200639.9	D5/D6	2	0.661426	-0.596525	1.56091	ENST00000200639.9 D5/D6	0.00619481	ENSG00000005893.17	LAMP2	protein_coding	LAMP2-201	protein_coding	6535	9	8	Low Confidence
ENST00000200639.9	M8/D6	2	0.763905	-0.388538	0.207371	ENST00000200639.9 M8/D6	0.0332246	ENSG00000005893.17	LAMP2	protein_coding	LAMP2-201	protein_coding	6535	9	8	Low Confidence
ENST00000202017.6	D5/D6	2	0.862716	-0.213049	0.294501	ENST00000202017.6 D5/D6	0.102335	ENSG00000088356.6	PDRG1	protein_coding	PDRG1-201	protein_coding	1957	5	4	Low Confidence
ENST00000202773.14	D5/D6	4	1.20811	0.271639	2.28815	ENST00000202773.14 D5/D6	0.00271829	ENSG00000089009.16	RPL6	protein_coding	RPL6-201	protein_coding	921	7	6	Medium Confidence
ENST00000202773.14	F7/D6	3	1.10163	0.139619	0.423644	ENST00000202773.14 F7/D6	0.0407619	ENSG00000089009.16	RPL6	protein_coding	RPL6-201	protein_coding	921	7	6	High Confidence
ENST00000202773.14	M8/D6	4	0.817622	-0.290563	0.566762	ENST00000202773.14 M8/D6	0.000859483	ENSG00000089009.16	RPL6	protein_coding	RPL6-201	protein_coding	921	7	6	High Confidence
ENST00000202834.11	M8/D6	2	0.847637	-0.238485	0.236082	ENST00000202834.11 M8/D6	0.0656493	ENSG00000089063.15	TMEM230	protein_coding	TMEM230-201	protein_coding	1472	4	3	Low Confidence
ENST00000202917.10	F7/D6	4	1.40822	0.493753	0.752674	ENST00000202917.10 F7/D6	0.00508822	ENSG00000089127.15	OAS1	protein_coding	OAS1-201	protein_coding	1631	6	5	High Confidence
ENST00000202917.10	M8/D6	3	0.176929	-2.50331	5.50697	ENST00000202917.10 M8/D6	3.22749e-09	ENSG00000089127.15	OAS1	protein_coding	OAS1-201	protein_coding	1631	6	5	Low Confidence
ENST00000203001.7	M8/D6	2	0.745951	-0.422868	0.543294	ENST00000203001.7 M8/D6	0.00668994	ENSG00000089195.15	TRMT6	protein_coding	TRMT6-201	protein_coding	2929	11	10	Low Confidence
ENST00000203407.6	D5/D6	3	0.952572	-0.0701399	0.52188	ENST00000203407.6 D5/D6	0.09314	ENSG00000010256.11	UQCRC1	protein_coding	UQCRC1-201	protein_coding	1595	13	12	High Confidence
ENST00000203556.9	D5/D6	3	0.871454	-0.198698	1.15872	ENST00000203556.9 D5/D6	0.245219	ENSG00000089639.11	GMIP	protein_coding	GMIP-201	protein_coding	3528	21	20	High Confidence
ENST00000203556.9	M8/D6	3	1.29866	0.375951	2.71359	ENST00000203556.9 M8/D6	0.0295446	ENSG00000089639.11	GMIP	protein_coding	GMIP-201	protein_coding	3528	21	20	Medium Confidence
ENST00000204517.11	D5/D6	3	2.10135	1.06957	3.46355	ENST00000204517.11 D5/D6	5.18293e-05	ENSG00000090447.12	TFAP4	protein_coding	TFAP4-201	protein_coding	2163	7	6	Medium Confidence
ENST00000204549.9	D5/D6	3	1.41623	0.501927	0.93133	ENST00000204549.9 D5/D6	0.00973182	ENSG00000090470.15	PDCD7	protein_coding	PDCD7-201	protein_coding	2823	5	4	High Confidence
ENST00000204679.9	M8/D6	2	0.845273	-0.242562	0.843551	ENST00000204679.9 M8/D6	0.120782	ENSG00000090581.11	GNPTG	protein_coding	GNPTG-201	protein_coding	1975	11	10	Low Confidence
ENST00000205061.9	D5/D6	2	0.759985	-0.395969	0.405857	ENST00000205061.9 D5/D6	0.0600179	ENSG00000090863.12	GLG1	protein_coding	GLG1-201	protein_coding	8261	27	26	Low Confidence
ENST00000205061.9	M8/D6	2	0.566706	-0.821404	5.36193	ENST00000205061.9 M8/D6	0.0438574	ENSG00000090863.12	GLG1	protein_coding	GLG1-201	protein_coding	8261	27	26	Low Confidence
ENST00000205636.4	M8/D6	3	0.822166	-0.282501	0.147753	ENST00000205636.4 M8/D6	0.0109187	ENSG00000091317.8	CMTM6	protein_coding	CMTM6-201	protein_coding	3307	4	3	High Confidence
ENST00000206451.11	D5/D6	3	0.91585	-0.126821	0.175571	ENST00000206451.11 D5/D6	0.00328571	ENSG00000092010.15	PSME1	protein_coding	PSME1-201	protein_coding	965	11	10	High Confidence
ENST00000206542.9	D5/D6	2	1.36275	0.446453	0.934186	ENST00000206542.9 D5/D6	0.00142326	ENSG00000092094.11	OSGEP	protein_coding	OSGEP-201	protein_coding	1976	11	10	Low Confidence
ENST00000206542.9	M8/D6	2	0.752615	-0.41002	0.218924	ENST00000206542.9 M8/D6	0.0262293	ENSG00000092094.11	OSGEP	protein_coding	OSGEP-201	protein_coding	1976	11	10	Low Confidence
ENST00000207549.9	D5/D6	3	0.737741	-0.438918	0.843575	ENST00000207549.9 D5/D6	0.00138173	ENSG00000092929.13	UNC13D	protein_coding	UNC13D-201	protein_coding	4080	32	31	High Confidence
ENST00000207549.9	M8/D6	3	0.722839	-0.46829	0.504369	ENST00000207549.9 M8/D6	0.00318289	ENSG00000092929.13	UNC13D	protein_coding	UNC13D-201	protein_coding	4080	32	31	High Confidence
ENST00000209875.9	D5/D6	3	0.926321	-0.110581	1.06625	ENST00000209875.9 D5/D6	0.136944	ENSG00000094916.16	CBX5	protein_coding	CBX5-201	protein_coding	11546	5	4	High Confidence
ENST00000210444.6	M8/D6	3	0.736009	-0.442401	1.16256	ENST00000210444.6 M8/D6	0.0117977	ENSG00000095380.11	NANS	protein_coding	NANS-201	protein_coding	1179	6	5	High Confidence
ENST00000211287.9	D5/D6	3	0.437035	-1.19433	1.02442	ENST00000211287.9 D5/D6	0.00257736	ENSG00000156711.17	MAPK13	protein_coding	MAPK13-201	protein_coding	6316	12	11	High Confidence
ENST00000211287.9	M8/D6	2	0.640952	-0.64188	1.52929	ENST00000211287.9 M8/D6	0.0368281	ENSG00000156711.17	MAPK13	protein_coding	MAPK13-201	protein_coding	6316	12	11	Low Confidence
ENST00000211314.5	D5/D6	4	0.71562	-0.482748	0.241325	ENST00000211314.5 D5/D6	0.00613047	ENSG00000096092.6	TMEM14A	protein_coding	TMEM14A-201	protein_coding	988	5	4	High Confidence
ENST00000211314.5	M8/D6	3	0.723692	-0.466575	0.394678	ENST00000211314.5 M8/D6	0.00487335	ENSG00000096092.6	TMEM14A	protein_coding	TMEM14A-201	protein_coding	988	5	4	High Confidence
ENST00000211379.9	M8/D6	2	0.639103	-0.647008	3.95253	ENST00000211379.9 M8/D6	0.00476273	ENSG00000204463.14	BAG6	protein_coding	BAG6-234	protein_coding	3779	25	24	Low Confidence
ENST00000212355.9	D5/D6	2	4.16336	2.05627	4.51698	ENST00000212355.9 D5/D6	0.000561702	ENSG00000069702.11	TGFBR3	protein_coding	TGFBR3-201	protein_coding	6339	17	16	Low Confidence
ENST00000214869.7	D5/D6	2	0.877473	-0.188609	0.698344	ENST00000214869.7 D5/D6	0.117006	ENSG00000099203.7	TMED1	protein_coding	TMED1-201	protein_coding	1633	4	3	Low Confidence
ENST00000215061.9	D5/D6	2	0.577528	-0.792076	0.731049	ENST00000215061.9 D5/D6	0.19351	ENSG00000099330.9	OCEL1	protein_coding	OCEL1-201	protein_coding	1111	6	5	Low Confidence
ENST00000215565.3	D5/D6	3	0.810631	-0.303035	1.03213	ENST00000215565.3 D5/D6	0.0323825	ENSG00000099795.7	NDUFB7	protein_coding	NDUFB7-201	protein_coding	535	3	2	High Confidence
ENST00000215565.3	M8/D6	3	0.869341	-0.202007	0.0588935	ENST00000215565.3 M8/D6	0.0518671	ENSG00000099795.7	NDUFB7	protein_coding	NDUFB7-201	protein_coding	535	3	2	High Confidence
ENST00000215567.10	D5/D6	3	0.959653	-0.0594403	0.412789	ENST00000215567.10 D5/D6	0.0986714	ENSG00000099797.15	TECR	protein_coding	TECR-201	protein_coding	1139	13	12	High Confidence
ENST00000215567.10	F7/D6	3	0.803263	-0.316194	0.983044	ENST00000215567.10 F7/D6	0.0530173	ENSG00000099797.15	TECR	protein_coding	TECR-201	protein_coding	1139	13	12	High Confidence
ENST00000215570.8	D5/D6	3	1.36669	0.449917	2.28589	ENST00000215570.8 D5/D6	0.000242649	ENSG00000099800.8	TIMM13	protein_coding	TIMM13-201	protein_coding	1664	3	2	Medium Confidence
ENST00000215631.9	D5/D6	4	0.42552	-1.23288	0.909775	ENST00000215631.9 D5/D6	1.3153e-05	ENSG00000099860.9	GADD45B	protein_coding	GADD45B-201	protein_coding	1371	4	3	High Confidence
ENST00000215631.9	F7/D6	3	1.20458	0.268517	0.289664	ENST00000215631.9 F7/D6	0.0256528	ENSG00000099860.9	GADD45B	protein_coding	GADD45B-201	protein_coding	1371	4	3	High Confidence
ENST00000215659.13	D5/D6	3	1.86637	0.899902	1.50846	ENST00000215659.13 D5/D6	0.0113584	ENSG00000188130.14	MAPK12	protein_coding	MAPK12-201	protein_coding	1778	12	11	High Confidence
ENST00000215790.12	M8/D6	2	1.22237	0.288741	3.59706	ENST00000215790.12 M8/D6	0.15314	ENSG00000099992.16	TBC1D10A	protein_coding	TBC1D10A-201	protein_coding	1972	9	8	Medium Confidence
ENST00000215794.8	D5/D6	4	0.792165	-0.336371	1.05968	ENST00000215794.8 D5/D6	0.0137807	ENSG00000184979.11	USP18	protein_coding	USP18-201	protein_coding	1858	11	10	High Confidence
ENST00000215832.11	D5/D6	2	1.25466	0.327279	0.475627	ENST00000215832.11 D5/D6	0.0670518	ENSG00000100030.15	MAPK1	protein_coding	MAPK1-201	protein_coding	5881	9	8	Low Confidence
ENST00000215838.8	D5/D6	2	0.464882	-1.10514	1.01763	ENST00000215838.8 D5/D6	0.0368813	ENSG00000185339.10	TCN2	protein_coding	TCN2-201	protein_coding	2192	9	8	Low Confidence
ENST00000215838.8	M8/D6	2	1.8476	0.88511	2.74779	ENST00000215838.8 M8/D6	0.0271106	ENSG00000185339.10	TCN2	protein_coding	TCN2-201	protein_coding	2192	9	8	Medium Confidence
ENST00000215882.10	D5/D6	3	0.823067	-0.281302	1.62422	ENST00000215882.10 D5/D6	0.258108	ENSG00000100075.10	SLC25A1	protein_coding	SLC25A1-201	protein_coding	1548	9	8	High Confidence
ENST00000215909.10	D5/D6	3	1.1621	0.216698	0.463949	ENST00000215909.10 D5/D6	0.0191175	ENSG00000100097.12	LGALS1	protein_coding	LGALS1-201	protein_coding	528	4	3	High Confidence
ENST00000215909.10	F7/D6	4	1.36687	0.450712	0.860491	ENST00000215909.10 F7/D6	0.00115192	ENSG00000100097.12	LGALS1	protein_coding	LGALS1-201	protein_coding	528	4	3	High Confidence
ENST00000215909.10	M8/D6	3	0.752729	-0.409803	0.19963	ENST00000215909.10 M8/D6	0.00659884	ENSG00000100097.12	LGALS1	protein_coding	LGALS1-201	protein_coding	528	4	3	High Confidence
ENST00000215912.10	D5/D6	3	0.528493	-0.922496	4.15245	ENST00000215912.10 D5/D6	0.0479504	ENSG00000100100.13	PIK3IP1	protein_coding	PIK3IP1-201	protein_coding	2420	6	5	Low Confidence
ENST00000215917.11	D5/D6	3	1.67204	0.738112	4.87615	ENST00000215917.11 D5/D6	0.0100916	ENSG00000100104.13	SRRD	protein_coding	SRRD-201	protein_coding	4020	7	6	Low Confidence
ENST00000215956.10	D5/D6	2	1.42112	0.507024	0.311068	ENST00000215956.10 D5/D6	0.0133651	ENSG00000100138.15	SNU13	protein_coding	SNU13-201	protein_coding	877	3	2	Low Confidence
ENST00000215980.10	D5/D6	3	0.8029	-0.316713	0.174317	ENST00000215980.10 D5/D6	0.0125784	ENSG00000100162.15	CENPM	protein_coding	CENPM-201	protein_coding	938	6	5	High Confidence
ENST00000215980.10	M8/D6	4	1.42549	0.511131	1.22727	ENST00000215980.10 M8/D6	0.0394263	ENSG00000100162.15	CENPM	protein_coding	CENPM-201	protein_coding	938	6	5	High Confidence
ENST00000216019.11	D5/D6	3	1.3545	0.437223	1.93088	ENST00000216019.11 D5/D6	0.038381	ENSG00000100201.23	DDX17	protein_coding	DDX17-201	retained_intron	6441	12	11	Medium Confidence
ENST00000216034.6	M8/D6	3	0.829025	-0.272121	3.34111	ENST00000216034.6 M8/D6	0.0254209	ENSG00000100216.6	TOMM22	protein_coding	TOMM22-201	protein_coding	2031	4	3	Medium Confidence
ENST00000216037.10	D5/D6	3	0.649603	-0.623717	3.06381	ENST00000216037.10 D5/D6	4.74965e-05	ENSG00000100219.17	XBP1	protein_coding	XBP1-201	protein_coding	1850	5	4	Medium Confidence
ENST00000216037.10	F7/D6	3	0.891905	-0.166003	2.57428	ENST00000216037.10 F7/D6	0.0159796	ENSG00000100219.17	XBP1	protein_coding	XBP1-201	protein_coding	1850	5	4	Medium Confidence
ENST00000216037.10	M8/D6	3	0.832414	-0.264866	1.28461	ENST00000216037.10 M8/D6	0.00443767	ENSG00000100219.17	XBP1	protein_coding	XBP1-201	protein_coding	1850	5	4	High Confidence
ENST00000216038.6	D5/D6	3	0.827317	-0.273543	0.617412	ENST00000216038.6 D5/D6	0.0131881	ENSG00000100220.12	RTCB	protein_coding	RTCB-201	protein_coding	2019	12	11	High Confidence
ENST00000216038.6	F7/D6	3	1.11713	0.159769	0.41386	ENST00000216038.6 F7/D6	0.151684	ENSG00000100220.12	RTCB	protein_coding	RTCB-201	protein_coding	2019	12	11	High Confidence
ENST00000216039.9	D5/D6	2	1.34943	0.432342	0.22741	ENST00000216039.9 D5/D6	0.021502	ENSG00000100221.11	JOSD1	protein_coding	JOSD1-201	protein_coding	3648	4	3	Low Confidence
ENST00000216085.12	M8/D6	2	0.720196	-0.473615	1.02636	ENST00000216085.12 M8/D6	0.139273	ENSG00000100263.14	RHBDD3	protein_coding	RHBDD3-201	protein_coding	1777	7	6	Low Confidence
ENST00000216115.3	D5/D6	3	1.77143	0.82437	1.92682	ENST00000216115.3 D5/D6	0.000440074	ENSG00000100290.3	BIK	protein_coding	BIK-201	protein_coding	951	5	4	Medium Confidence
ENST00000216115.3	F7/D6	3	0.328944	-1.60413	0.551031	ENST00000216115.3 F7/D6	0.000173339	ENSG00000100290.3	BIK	protein_coding	BIK-201	protein_coding	951	5	4	High Confidence
ENST00000216115.3	M8/D6	3	2.22164	1.15132	1.46043	ENST00000216115.3 M8/D6	0.000187736	ENSG00000100290.3	BIK	protein_coding	BIK-201	protein_coding	951	5	4	High Confidence
ENST00000216117.9	D5/D6	4	0.374246	-1.41905	2.23697	ENST00000216117.9 D5/D6	0.00419955	ENSG00000100292.18	HMOX1	protein_coding	HMOX1-201	protein_coding	1554	5	4	Medium Confidence
ENST00000216117.9	F7/D6	3	0.636185	-0.652826	1.53842	ENST00000216117.9 F7/D6	0.0439925	ENSG00000100292.18	HMOX1	protein_coding	HMOX1-201	protein_coding	1554	5	4	High Confidence
ENST00000216117.9	M8/D6	4	0.426916	-1.22882	1.96678	ENST00000216117.9 M8/D6	0.00268904	ENSG00000100292.18	HMOX1	protein_coding	HMOX1-201	protein_coding	1554	5	4	Medium Confidence
ENST00000216121.12	F7/D6	4	1.51942	0.603447	0.587719	ENST00000216121.12 F7/D6	0.000598643	ENSG00000184117.12	NIPSNAP1	protein_coding	NIPSNAP1-201	protein_coding	2013	10	9	High Confidence
ENST00000216121.12	M8/D6	2	0.860494	-0.216763	0.0705879	ENST00000216121.12 M8/D6	0.0591737	ENSG00000184117.12	NIPSNAP1	protein_coding	NIPSNAP1-201	protein_coding	2013	10	9	Low Confidence
ENST00000216122.9	D5/D6	3	1.3239	0.403693	2.76146	ENST00000216122.9 D5/D6	0.0173685	ENSG00000100297.16	MCM5	protein_coding	MCM5-201	protein_coding	3458	17	16	Medium Confidence
ENST00000216124.10	D5/D6	2	0.739428	-0.437038	4.58775	ENST00000216124.10 D5/D6	0.250693	ENSG00000100299.18	ARSA	protein_coding	ARSA-201	protein_coding	4294	8	7	Low Confidence
ENST00000216129.7	D5/D6	3	1.90941	0.932051	2.75255	ENST00000216129.7 D5/D6	0.00106846	ENSG00000100304.13	TTLL12	protein_coding	TTLL12-201	protein_coding	3386	14	13	Medium Confidence
ENST00000216146.9	D5/D6	4	1.23297	0.302044	0.648355	ENST00000216146.9 D5/D6	0.00102222	ENSG00000100316.16	RPL3	protein_coding	RPL3-201	protein_coding	1296	10	9	High Confidence
ENST00000216146.9	F7/D6	4	1.27822	0.354112	0.334852	ENST00000216146.9 F7/D6	0.000864142	ENSG00000100316.16	RPL3	protein_coding	RPL3-201	protein_coding	1296	10	9	High Confidence
ENST00000216181.11	D5/D6	4	0.859586	-0.218557	1.12355	ENST00000216181.11 D5/D6	0.0140041	ENSG00000100345.23	MYH9	protein_coding	MYH9-201	protein_coding	7451	41	40	High Confidence
ENST00000216185.7	D5/D6	3	1.15701	0.210394	0.283625	ENST00000216185.7 D5/D6	0.018917	ENSG00000100348.10	TXN2	protein_coding	TXN2-201	protein_coding	1336	4	3	High Confidence
ENST00000216185.7	F7/D6	3	1.1568	0.210101	0.549396	ENST00000216185.7 F7/D6	0.0672473	ENSG00000100348.10	TXN2	protein_coding	TXN2-201	protein_coding	1336	4	3	High Confidence
ENST00000216190.13	D5/D6	3	1.32348	0.404302	0.457722	ENST00000216190.13 D5/D6	0.000276594	ENSG00000100353.18	EIF3D	protein_coding	EIF3D-201	protein_coding	1880	15	14	High Confidence
ENST00000216190.13	F7/D6	3	1.22443	0.292066	0.583514	ENST00000216190.13 F7/D6	0.00117864	ENSG00000100353.18	EIF3D	protein_coding	EIF3D-201	protein_coding	1880	15	14	High Confidence
ENST00000216190.13	M8/D6	3	1.11044	0.1511	0.462714	ENST00000216190.13 M8/D6	0.0203917	ENSG00000100353.18	EIF3D	protein_coding	EIF3D-201	protein_coding	1880	15	14	High Confidence
ENST00000216218.8	D5/D6	3	1.12499	0.169751	1.07491	ENST00000216218.8 D5/D6	0.0766348	ENSG00000100380.15	ST13	protein_coding	ST13-201	protein_coding	3212	12	11	High Confidence
ENST00000216225.9	F7/D6	2	0.856151	-0.224082	0.518573	ENST00000216225.9 F7/D6	0.0308238	ENSG00000100387.9	RBX1	protein_coding	RBX1-201	protein_coding	1169	5	4	Low Confidence
ENST00000216237.10	D5/D6	3	1.3777	0.462253	0.294663	ENST00000216237.10 D5/D6	0.00872186	ENSG00000100395.15	L3MBTL2	protein_coding	L3MBTL2-201	protein_coding	3189	17	16	High Confidence
ENST00000216237.10	F7/D6	2	0.857348	-0.222202	1.4624	ENST00000216237.10 F7/D6	0.106614	ENSG00000100395.15	L3MBTL2	protein_coding	L3MBTL2-201	protein_coding	3189	17	16	Low Confidence
ENST00000216237.10	M8/D6	3	0.791812	-0.336816	0.562136	ENST00000216237.10 M8/D6	0.0665812	ENSG00000100395.15	L3MBTL2	protein_coding	L3MBTL2-201	protein_coding	3189	17	16	High Confidence
ENST00000216252.4	D5/D6	2	1.15467	0.20744	0.743703	ENST00000216252.4 D5/D6	0.078983	ENSG00000100410.8	PHF5A	protein_coding	PHF5A-201	protein_coding	1053	4	3	Low Confidence
ENST00000216252.4	F7/D6	2	0.806809	-0.309703	0.132506	ENST00000216252.4 F7/D6	0.0518921	ENSG00000100410.8	PHF5A	protein_coding	PHF5A-201	protein_coding	1053	4	3	Low Confidence
ENST00000216254.9	D5/D6	2	1.05421	0.0738896	5.60712	ENST00000216254.9 D5/D6	0.150067	ENSG00000100412.17	ACO2	protein_coding	ACO2-201	protein_coding	2734	18	17	Low Confidence
ENST00000216254.9	M8/D6	3	0.743427	-0.428835	2.75247	ENST00000216254.9 M8/D6	0.00242631	ENSG00000100412.17	ACO2	protein_coding	ACO2-201	protein_coding	2734	18	17	Medium Confidence
ENST00000216259.8	D5/D6	3	0.710588	-0.49346	1.95537	ENST00000216259.8 D5/D6	0.014964	ENSG00000100417.12	PMM1	protein_coding	PMM1-201	protein_coding	1242	8	7	Medium Confidence
ENST00000216259.8	F7/D6	2	1.24605	0.317318	0.805243	ENST00000216259.8 F7/D6	0.0551314	ENSG00000100417.12	PMM1	protein_coding	PMM1-201	protein_coding	1242	8	7	Low Confidence
ENST00000216264.13	D5/D6	3	0.798545	-0.324604	0.581889	ENST00000216264.13 D5/D6	0.248447	ENSG00000100422.14	CERK	protein_coding	CERK-201	protein_coding	4442	13	12	High Confidence
ENST00000216268.6	D5/D6	3	1.35585	0.439158	0.500499	ENST00000216268.6 D5/D6	0.05205	ENSG00000100426.7	ZBED4	protein_coding	ZBED4-201	protein_coding	6893	2	1	High Confidence
ENST00000216277.13	F7/D6	3	0.79083	-0.338565	0.190544	ENST00000216277.13 F7/D6	0.09277	ENSG00000090060.19	PAPOLA	protein_coding	PAPOLA-201	protein_coding	4515	22	21	High Confidence
ENST00000216281.13	D5/D6	4	0.752185	-0.412429	2.66825	ENST00000216281.13 D5/D6	0.00129126	ENSG00000080824.19	HSP90AA1	protein_coding	HSP90AA1-201	protein_coding	3228	11	10	Medium Confidence
ENST00000216281.13	F7/D6	3	0.832422	-0.265009	1.64836	ENST00000216281.13 F7/D6	0.00566529	ENSG00000080824.19	HSP90AA1	protein_coding	HSP90AA1-201	protein_coding	3228	11	10	High Confidence
ENST00000216281.13	M8/D6	4	0.729029	-0.456692	1.85273	ENST00000216281.13 M8/D6	0.000353369	ENSG00000080824.19	HSP90AA1	protein_coding	HSP90AA1-201	protein_coding	3228	11	10	Medium Confidence
ENST00000216297.7	D5/D6	4	1.21463	0.279789	1.81612	ENST00000216297.7 D5/D6	0.0251974	ENSG00000092201.10	SUPT16H	protein_coding	SUPT16H-201	protein_coding	4433	26	25	Medium Confidence
ENST00000216373.10	M8/D6	2	0.827484	-0.274724	4.59926	ENST00000216373.10 M8/D6	0.203796	ENSG00000100485.12	SOS2	protein_coding	SOS2-201	protein_coding	5508	23	22	Low Confidence
ENST00000216410.8	F7/D6	2	1.17035	0.22611	3.39803	ENST00000216410.8 F7/D6	0.0426261	ENSG00000100522.10	GNPNAT1	protein_coding	GNPNAT1-201	protein_coding	3867	6	5	Medium Confidence
ENST00000216416.9	F7/D6	3	0.92683	-0.11097	3.08177	ENST00000216416.9 F7/D6	0.179219	ENSG00000100528.12	CNIH1	protein_coding	CNIH1-201	protein_coding	4735	5	4	Medium Confidence
ENST00000216416.9	M8/D6	3	0.925685	-0.112944	3.29816	ENST00000216416.9 M8/D6	0.0348992	ENSG00000100528.12	CNIH1	protein_coding	CNIH1-201	protein_coding	4735	5	4	Medium Confidence
ENST00000216420.12	D5/D6	3	0.788937	-0.342047	0.447565	ENST00000216420.12 D5/D6	0.0381254	ENSG00000100532.13	CGRRF1	protein_coding	CGRRF1-201	protein_coding	1962	6	5	High Confidence
ENST00000216463.8	M8/D6	3	1.31069	0.389739	1.99848	ENST00000216463.8 M8/D6	0.0658019	ENSG00000100575.14	TIMM9	protein_coding	TIMM9-201	protein_coding_CDS_not_defined	1075	5	4	Medium Confidence
ENST00000216468.8	D5/D6	3	1.27874	0.354626	0.838439	ENST00000216468.8 D5/D6	0.0376834	ENSG00000100580.8	TMED8	protein_coding	TMED8-201	protein_coding	7761	6	5	High Confidence
ENST00000216468.8	M8/D6	2	1.14339	0.193245	1.01757	ENST00000216468.8 M8/D6	0.0662494	ENSG00000100580.8	TMED8	protein_coding	TMED8-201	protein_coding	7761	6	5	Low Confidence
ENST00000216479.8	D5/D6	3	1.12535	0.170374	0.0643834	ENST00000216479.8 D5/D6	0.0720537	ENSG00000100591.8	AHSA1	protein_coding	AHSA1-201	protein_coding	1337	9	8	High Confidence
ENST00000216487.12	D5/D6	2	0.449649	-1.15314	0.394244	ENST00000216487.12 D5/D6	0.000666673	ENSG00000100599.16	RIN3	protein_coding	RIN3-201	protein_coding	3852	10	9	Low Confidence
ENST00000216487.12	M8/D6	2	1.22335	0.290142	3.10196	ENST00000216487.12 M8/D6	0.145883	ENSG00000100599.16	RIN3	protein_coding	RIN3-201	protein_coding	3852	10	9	Medium Confidence
ENST00000216500.9	D5/D6	2	1.15658	0.14088	30.2008	ENST00000216500.9 D5/D6	0.00961585	ENSG00000100612.14	DHRS7	protein_coding	DHRS7-201	protein_coding	2322	8	7	Low Confidence
ENST00000216554.8	D5/D6	3	0.780761	-0.357113	0.67105	ENST00000216554.8 D5/D6	0.0060767	ENSG00000100664.11	EIF5	protein_coding	EIF5-201	protein_coding	5710	12	11	High Confidence
ENST00000216554.8	M8/D6	2	0.865706	-0.208069	0.501126	ENST00000216554.8 M8/D6	0.0170098	ENSG00000100664.11	EIF5	protein_coding	EIF5-201	protein_coding	5710	12	11	Low Confidence
ENST00000216714.8	D5/D6	4	1.37892	0.463501	0.423289	ENST00000216714.8 D5/D6	0.000145671	ENSG00000100823.12	APEX1	protein_coding	APEX1-201	protein_coding	1453	5	4	High Confidence
ENST00000216714.8	M8/D6	3	0.832008	-0.265449	0.909841	ENST00000216714.8 M8/D6	0.0198463	ENSG00000100823.12	APEX1	protein_coding	APEX1-201	protein_coding	1453	5	4	High Confidence
ENST00000216727.9	D5/D6	3	1.34124	0.421019	4.22303	ENST00000216727.9 D5/D6	0.0973293	ENSG00000100836.11	PABPN1	protein_coding	PABPN1-201	protein_coding	1811	7	6	Low Confidence
ENST00000216756.11	D5/D6	3	0.815473	-0.294303	0.302674	ENST00000216756.11 D5/D6	0.00255665	ENSG00000100865.15	CINP	protein_coding	CINP-201	protein_coding	953	5	4	High Confidence
ENST00000216756.11	M8/D6	3	0.816121	-0.293278	0.961887	ENST00000216756.11 M8/D6	0.038515	ENSG00000100865.15	CINP	protein_coding	CINP-201	protein_coding	953	5	4	High Confidence
ENST00000216780.9	D5/D6	3	1.04418	0.062342	0.425531	ENST00000216780.9 D5/D6	0.0456337	ENSG00000100889.12	PCK2	protein_coding	PCK2-201	protein_coding	2179	10	9	High Confidence
ENST00000216780.9	F7/D6	3	0.883325	-0.179018	0.496712	ENST00000216780.9 F7/D6	0.0674455	ENSG00000100889.12	PCK2	protein_coding	PCK2-201	protein_coding	2179	10	9	High Confidence
ENST00000216780.9	M8/D6	3	0.739747	-0.441332	6.80761	ENST00000216780.9 M8/D6	0.000373995	ENSG00000100889.12	PCK2	protein_coding	PCK2-201	protein_coding	2179	10	9	Low Confidence
ENST00000216797.10	D5/D6	4	0.471898	-1.08365	0.944082	ENST00000216797.10 D5/D6	8.72183e-06	ENSG00000100906.12	NFKBIA	protein_coding	NFKBIA-201	protein_coding	1559	6	5	High Confidence
ENST00000216797.10	F7/D6	3	1.34647	0.427578	3.36669	ENST00000216797.10 F7/D6	0.0130484	ENSG00000100906.12	NFKBIA	protein_coding	NFKBIA-201	protein_coding	1559	6	5	Medium Confidence
ENST00000216797.10	M8/D6	3	0.841503	-0.250718	3.51849	ENST00000216797.10 M8/D6	0.000679024	ENSG00000100906.12	NFKBIA	protein_coding	NFKBIA-201	protein_coding	1559	6	5	Medium Confidence
ENST00000216799.9	D5/D6	3	0.684684	-0.547445	2.58972	ENST00000216799.9 D5/D6	0.0532468	ENSG00000100908.14	EMC9	protein_coding	EMC9-201	protein_coding	838	6	5	Medium Confidence
ENST00000216802.10	D5/D6	3	0.914945	-0.128248	0.176278	ENST00000216802.10 D5/D6	0.00621217	ENSG00000100911.16	PSME2	protein_coding	PSME2-201	protein_coding	793	11	10	High Confidence
ENST00000216802.10	M8/D6	2	0.796465	-0.32841	1.13134	ENST00000216802.10 M8/D6	0.0432653	ENSG00000100911.16	PSME2	protein_coding	PSME2-201	protein_coding	793	11	10	Low Confidence
ENST00000216832.9	D5/D6	3	1.27501	0.349918	2.0328	ENST00000216832.9 D5/D6	0.00733137	ENSG00000100941.9	PNN	protein_coding	PNN-201	protein_coding	3537	9	8	Medium Confidence
ENST00000216840.11	F7/D6	2	1.20679	0.271026	1.46219	ENST00000216840.11 F7/D6	0.0678387	ENSG00000100949.15	RABGGTA	protein_coding	RABGGTA-201	protein_coding	1946	17	16	Low Confidence
ENST00000217026.5	F7/D6	2	0.479854	-1.05953	1.64228	ENST00000217026.5 F7/D6	0.00202287	ENSG00000101057.16	MYBL2	protein_coding	MYBL2-201	protein_coding	2668	14	13	Low Confidence
ENST00000217026.5	M8/D6	2	1.01294	0.0185033	0.769756	ENST00000217026.5 M8/D6	0.00884049	ENSG00000101057.16	MYBL2	protein_coding	MYBL2-201	protein_coding	2668	14	13	Low Confidence
ENST00000217159.6	D5/D6	4	2.61637	1.38546	3.17971	ENST00000217159.6 D5/D6	0.00593533	ENSG00000101187.16	SLCO4A1	protein_coding	SLCO4A1-201	protein_coding	2716	12	11	Medium Confidence
ENST00000217159.6	M8/D6	4	1.918	0.937922	2.78704	ENST00000217159.6 M8/D6	0.014304	ENSG00000101187.16	SLCO4A1	protein_coding	SLCO4A1-201	protein_coding	2716	12	11	Medium Confidence
ENST00000217233.9	D5/D6	4	1.34412	0.426591	0.590452	ENST00000217233.9 D5/D6	0.000606714	ENSG00000101255.12	TRIB3	protein_coding	TRIB3-201	protein_coding	2356	4	3	High Confidence
ENST00000217233.9	F7/D6	4	0.842021	-0.248191	0.738899	ENST00000217233.9 F7/D6	0.0142802	ENSG00000101255.12	TRIB3	protein_coding	TRIB3-201	protein_coding	2356	4	3	High Confidence
ENST00000217244.9	F7/D6	2	0.68931	-0.53679	0.473014	ENST00000217244.9 F7/D6	0.0493354	ENSG00000101266.19	CSNK2A1	protein_coding	CSNK2A1-201	protein_coding	12984	14	13	Low Confidence
ENST00000217426.7	D5/D6	4	1.48049	0.565435	1.72723	ENST00000217426.7 D5/D6	0.000291468	ENSG00000101444.13	AHCY	protein_coding	AHCY-201	protein_coding	2150	10	9	High Confidence
ENST00000217426.7	F7/D6	4	1.23172	0.299616	2.23282	ENST00000217426.7 F7/D6	0.0209631	ENSG00000101444.13	AHCY	protein_coding	AHCY-201	protein_coding	2150	10	9	Medium Confidence
ENST00000217455.9	M8/D6	3	0.690262	-0.535817	2.66508	ENST00000217455.9 M8/D6	0.0294215	ENSG00000101473.17	ACOT8	protein_coding	ACOT8-201	protein_coding	1154	6	5	Medium Confidence
ENST00000217456.3	F7/D6	3	0.915286	-0.128954	2.91164	ENST00000217456.3 F7/D6	0.307093	ENSG00000101474.12	APMAP	protein_coding	APMAP-201	protein_coding	2202	9	8	Medium Confidence
ENST00000217456.3	M8/D6	2	0.84865	-0.236902	1.41572	ENST00000217456.3 M8/D6	0.120132	ENSG00000101474.12	APMAP	protein_coding	APMAP-201	protein_coding	2202	9	8	Low Confidence
ENST00000217515.11	D5/D6	2	0.950963	-0.0725478	0.349452	ENST00000217515.11 D5/D6	0.0519225	ENSG00000091164.13	TXNL1	protein_coding	TXNL1-201	protein_coding	6840	8	7	Low Confidence
ENST00000217652.8	D5/D6	4	1.29646	0.374143	1.40384	ENST00000217652.8 D5/D6	0.00521743	ENSG00000101608.13	MYL12A	protein_coding	MYL12A-201	protein_coding	958	4	3	High Confidence
ENST00000217652.8	M8/D6	3	1.09288	0.128096	0.53152	ENST00000217652.8 M8/D6	0.035781	ENSG00000101608.13	MYL12A	protein_coding	MYL12A-201	protein_coding	958	4	3	High Confidence
ENST00000217740.4	D5/D6	2	1.4284	0.513567	3.39388	ENST00000217740.4 D5/D6	0.0593274	ENSG00000101695.9	RNF125	protein_coding	RNF125-201	protein_coding	5573	6	5	Medium Confidence
ENST00000217893.10	D5/D6	3	1.23236	0.301327	0.793576	ENST00000217893.10 D5/D6	0.0305868	ENSG00000273841.6	TAF9	protein_coding	TAF9-201	protein_coding	1163	3	2	High Confidence
ENST00000217901.10	D5/D6	2	0.951749	-0.0713867	0.736666	ENST00000217901.10 D5/D6	0.0909676	ENSG00000067829.20	IDH3G	protein_coding	IDH3G-201	protein_coding	1335	13	12	Low Confidence
ENST00000217901.10	F7/D6	3	0.809569	-0.304785	0.260024	ENST00000217901.10 F7/D6	0.017941	ENSG00000067829.20	IDH3G	protein_coding	IDH3G-201	protein_coding	1335	13	12	High Confidence
ENST00000217958.8	F7/D6	2	0.8868	-0.173322	0.188342	ENST00000217958.8 F7/D6	0.0489813	ENSG00000101843.19	PSMD10	protein_coding	PSMD10-201	protein_coding	1470	5	4	Low Confidence
ENST00000217961.5	D5/D6	2	0.202664	-2.30311	1.9547	ENST00000217961.5 D5/D6	0.000524478	ENSG00000101846.9	STS	protein_coding	STS-201	protein_coding	6521	10	9	Medium Confidence
ENST00000218388.9	D5/D6	3	0.590172	-0.762212	3.10225	ENST00000218388.9 D5/D6	2.65868e-05	ENSG00000102265.12	TIMP1	protein_coding	TIMP1-201	protein_coding	769	6	5	Medium Confidence
ENST00000218388.9	F7/D6	3	1.10609	0.145328	0.995738	ENST00000218388.9 F7/D6	0.211228	ENSG00000102265.12	TIMP1	protein_coding	TIMP1-201	protein_coding	769	6	5	High Confidence
ENST00000218388.9	M8/D6	3	0.792903	-0.334917	0.965305	ENST00000218388.9 M8/D6	0.0242701	ENSG00000102265.12	TIMP1	protein_coding	TIMP1-201	protein_coding	769	6	5	High Confidence
ENST00000218516.4	F7/D6	3	0.636153	-0.652768	1.21727	ENST00000218516.4 F7/D6	0.0264719	ENSG00000102393.14	GLA	protein_coding	GLA-201	protein_coding	1318	7	6	High Confidence
ENST00000218516.4	M8/D6	3	1.70864	0.772076	2.32637	ENST00000218516.4 M8/D6	0.00438482	ENSG00000102393.14	GLA	protein_coding	GLA-201	protein_coding	1318	7	6	Medium Confidence
ENST00000218758.10	F7/D6	3	0.458046	-1.12706	2.07566	ENST00000218758.10 F7/D6	0.000214801	ENSG00000102575.14	ACP5	protein_coding	ACP5-201	protein_coding	1752	7	6	Medium Confidence
ENST00000219066.5	D5/D6	3	1.65502	0.71789	8.0485	ENST00000219066.5 D5/D6	0.0295988	ENSG00000065057.9	NTHL1	protein_coding	NTHL1-201	protein_coding	1067	6	5	Low Confidence
ENST00000219097.7	M8/D6	3	1.53601	0.618887	1.45	ENST00000219097.7 M8/D6	0.0290078	ENSG00000091651.9	ORC6	protein_coding	ORC6-201	protein_coding	1615	7	6	High Confidence
ENST00000219150.10	D5/D6	2	1.11673	0.159252	0.55326	ENST00000219150.10 D5/D6	0.0234005	ENSG00000102879.17	CORO1A	protein_coding	CORO1A-201	protein_coding	1623	11	10	Low Confidence
ENST00000219150.10	M8/D6	4	1.35713	0.440481	0.607805	ENST00000219150.10 M8/D6	0.00407575	ENSG00000102879.17	CORO1A	protein_coding	CORO1A-201	protein_coding	1623	11	10	High Confidence
ENST00000219168.8	D5/D6	3	0.727294	-0.459766	1.62311	ENST00000219168.8 D5/D6	0.0503205	ENSG00000102897.10	LYRM1	protein_coding	LYRM1-201	protein_coding	1626	5	4	High Confidence
ENST00000219169.9	D5/D6	3	1.25189	0.324039	0.69819	ENST00000219169.9 D5/D6	0.0129798	ENSG00000102898.13	NUTF2	protein_coding	NUTF2-201	protein_coding	2120	5	4	High Confidence
ENST00000219204.8	D5/D6	3	0.711077	-0.493845	3.60336	ENST00000219204.8 D5/D6	0.00950794	ENSG00000102931.8	ARL2BP	protein_coding	ARL2BP-201	protein_coding	1969	6	5	Medium Confidence
ENST00000219235.5	D5/D6	4	0.167299	-2.58187	3.37587	ENST00000219235.5 D5/D6	5.01127e-08	ENSG00000102962.5	CCL22	protein_coding	CCL22-201	protein_coding	2917	3	2	Medium Confidence
ENST00000219235.5	F7/D6	4	2.1071	1.07505	0.980301	ENST00000219235.5 F7/D6	6.91754e-06	ENSG00000102962.5	CCL22	protein_coding	CCL22-201	protein_coding	2917	3	2	High Confidence
ENST00000219235.5	M8/D6	4	1.01329	0.0156654	4.01859	ENST00000219235.5 M8/D6	0.304899	ENSG00000102962.5	CCL22	protein_coding	CCL22-201	protein_coding	2917	3	2	Low Confidence
ENST00000219252.10	D5/D6	2	0.859078	-0.219251	1.24655	ENST00000219252.10 D5/D6	0.282005	ENSG00000102978.13	POLR2C	protein_coding	POLR2C-201	protein_coding	1764	9	8	Low Confidence
ENST00000219281.8	F7/D6	3	1.32625	0.407258	0.812838	ENST00000219281.8 F7/D6	0.0228298	ENSG00000103005.13	USB1	protein_coding	USB1-201	protein_coding	2248	7	6	High Confidence
ENST00000219302.8	D5/D6	3	0.76127	-0.394022	1.85675	ENST00000219302.8 D5/D6	0.0335837	ENSG00000103024.8	NME3	protein_coding	NME3-201	protein_coding	848	5	4	Medium Confidence
ENST00000219302.8	M8/D6	3	0.692424	-0.530592	1.48118	ENST00000219302.8 M8/D6	0.00292136	ENSG00000103024.8	NME3	protein_coding	NME3-201	protein_coding	848	5	4	High Confidence
ENST00000219313.9	F7/D6	3	0.880267	-0.183991	0.162243	ENST00000219313.9 F7/D6	0.0324005	ENSG00000103035.11	PSMD7	protein_coding	PSMD7-201	protein_coding	1631	7	6	High Confidence
ENST00000219315.9	D5/D6	2	1.41569	0.501467	0.741491	ENST00000219315.9 D5/D6	0.108896	ENSG00000103037.12	SETD6	protein_coding	SETD6-201	protein_coding	6256	8	7	Low Confidence
ENST00000219345.10	D5/D6	3	0.735853	-0.44435	3.56117	ENST00000219345.10 D5/D6	0.0798825	ENSG00000103066.13	PLA2G15	protein_coding	PLA2G15-201	protein_coding	2694	6	5	Medium Confidence
ENST00000219479.7	D5/D6	3	1.35808	0.441338	1.24924	ENST00000219479.7 D5/D6	0.00928458	ENSG00000103202.13	NME4	protein_coding	NME4-201	protein_coding	1000	5	4	High Confidence
ENST00000219481.10	F7/D6	2	1.67986	0.744376	7.40135	ENST00000219481.10 F7/D6	0.06244	ENSG00000242612.7	DECR2	protein_coding	DECR2-201	protein_coding	1551	9	8	Low Confidence
ENST00000219689.12	D5/D6	2	1.42971	0.515727	0.0560916	ENST00000219689.12 D5/D6	0.0375762	ENSG00000103404.15	USP31	protein_coding	USP31-201	protein_coding	10881	16	15	Low Confidence
ENST00000219782.11	D5/D6	2	1.90217	0.925802	5.0546	ENST00000219782.11 D5/D6	0.00958159	ENSG00000103495.15	MAZ	protein_coding	MAZ-201	protein_coding	2765	6	5	Low Confidence
ENST00000219794.11	D5/D6	2	0.836349	-0.257887	0.936587	ENST00000219794.11 D5/D6	0.121823	ENSG00000103507.14	BCKDK	protein_coding	BCKDK-201	protein_coding	2036	12	11	Low Confidence
ENST00000219919.9	F7/D6	3	0.573248	-0.802773	0.193618	ENST00000219919.9 F7/D6	0.0299123	ENSG00000103569.10	AQP9	protein_coding	AQP9-201	protein_coding	2849	6	5	High Confidence
ENST00000220003.14	M8/D6	2	1.18587	0.245828	1.28813	ENST00000220003.14 M8/D6	0.0638582	ENSG00000103653.17	CSK	protein_coding	CSK-201	protein_coding	2743	13	12	Low Confidence
ENST00000220166.10	F7/D6	2	0.73837	-0.437593	0.334872	ENST00000220166.10 F7/D6	0.00714819	ENSG00000103811.18	CTSH	protein_coding	CTSH-201	protein_coding	2145	12	11	Low Confidence
ENST00000220166.10	M8/D6	2	1.17999	0.238771	0.110636	ENST00000220166.10 M8/D6	0.014184	ENSG00000103811.18	CTSH	protein_coding	CTSH-201	protein_coding	2145	12	11	Low Confidence
ENST00000220325.9	D5/D6	3	1.37311	0.457117	1.50252	ENST00000220325.9 D5/D6	0.0455181	ENSG00000103966.11	EHD4	protein_coding	EHD4-201	protein_coding	6401	6	5	High Confidence
ENST00000220325.9	F7/D6	2	1.18422	0.243934	0.0492592	ENST00000220325.9 F7/D6	0.0663999	ENSG00000103966.11	EHD4	protein_coding	EHD4-201	protein_coding	6401	6	5	Low Confidence
ENST00000220325.9	M8/D6	4	0.727668	-0.461151	3.3502	ENST00000220325.9 M8/D6	0.0589568	ENSG00000103966.11	EHD4	protein_coding	EHD4-201	protein_coding	6401	6	5	Medium Confidence
ENST00000220507.5	D5/D6	3	0.700667	-0.514307	2.74959	ENST00000220507.5 D5/D6	0.0161007	ENSG00000104140.7	RHOV	protein_coding	RHOV-201	protein_coding	1650	3	2	Medium Confidence
ENST00000220507.5	F7/D6	3	2.15609	1.1077	2.21511	ENST00000220507.5 F7/D6	9.44921e-05	ENSG00000104140.7	RHOV	protein_coding	RHOV-201	protein_coding	1650	3	2	Medium Confidence
ENST00000220507.5	M8/D6	2	1.3259	0.40689	1.07125	ENST00000220507.5 M8/D6	0.224768	ENSG00000104140.7	RHOV	protein_coding	RHOV-201	protein_coding	1650	3	2	Low Confidence
ENST00000220514.8	D5/D6	2	0.745693	-0.423375	0.635468	ENST00000220514.8 D5/D6	0.0804428	ENSG00000104147.9	OIP5	protein_coding	OIP5-201	protein_coding	1201	5	4	Low Confidence
ENST00000220514.8	F7/D6	4	0.592643	-0.754771	0.185241	ENST00000220514.8 F7/D6	0.015388	ENSG00000104147.9	OIP5	protein_coding	OIP5-201	protein_coding	1201	5	4	High Confidence
ENST00000220584.9	M8/D6	2	1.18633	0.246434	0.983432	ENST00000220584.9 M8/D6	0.0587381	ENSG00000079459.13	FDFT1	protein_coding	FDFT1-201	protein_coding	2035	8	7	Low Confidence
ENST00000220592.10	D5/D6	3	1.23812	0.307466	2.17843	ENST00000220592.10 D5/D6	0.0407167	ENSG00000123908.12	AGO2	protein_coding	AGO2-201	protein_coding	14595	19	18	Medium Confidence
ENST00000220592.10	F7/D6	3	0.660438	-0.599111	2.04049	ENST00000220592.10 F7/D6	0.00731156	ENSG00000123908.12	AGO2	protein_coding	AGO2-201	protein_coding	14595	19	18	Medium Confidence
ENST00000220597.4	D5/D6	3	1.31377	0.393593	0.931314	ENST00000220597.4 D5/D6	0.00684816	ENSG00000076641.4	PAG1	protein_coding	PAG1-201	protein_coding	10744	9	8	High Confidence
ENST00000220597.4	F7/D6	2	1.20794	0.272543	0.268994	ENST00000220597.4 F7/D6	0.0569425	ENSG00000076641.4	PAG1	protein_coding	PAG1-201	protein_coding	10744	9	8	Low Confidence
ENST00000220597.4	M8/D6	3	1.30014	0.378362	1.47066	ENST00000220597.4 M8/D6	0.0115971	ENSG00000076641.4	PAG1	protein_coding	PAG1-201	protein_coding	10744	9	8	High Confidence
ENST00000220659.11	D5/D6	2	0.780064	-0.358387	0.850853	ENST00000220659.11 D5/D6	0.0141041	ENSG00000104221.13	BRF2	protein_coding	BRF2-201	protein_coding	2560	4	3	Low Confidence
ENST00000220669.10	D5/D6	2	1.28715	0.363119	3.82989	ENST00000220669.10 D5/D6	0.0411689	ENSG00000104231.11	ZFAND1	protein_coding	ZFAND1-201	protein_coding	2184	8	7	Low Confidence
ENST00000220669.10	F7/D6	2	1.25186	0.322975	3.90271	ENST00000220669.10 F7/D6	0.0311807	ENSG00000104231.11	ZFAND1	protein_coding	ZFAND1-201	protein_coding	2184	8	7	Low Confidence
ENST00000220669.10	M8/D6	3	1.18603	0.245015	2.77311	ENST00000220669.10 M8/D6	0.016562	ENSG00000104231.11	ZFAND1	protein_coding	ZFAND1-201	protein_coding	2184	8	7	Medium Confidence
ENST00000220751.5	D5/D6	3	1.31455	0.392616	3.71469	ENST00000220751.5 D5/D6	0.041086	ENSG00000104312.8	RIPK2	protein_coding	RIPK2-201	protein_coding	2516	11	10	Low Confidence
ENST00000220751.5	F7/D6	4	1.45973	0.544923	1.9015	ENST00000220751.5 F7/D6	0.00747159	ENSG00000104312.8	RIPK2	protein_coding	RIPK2-201	protein_coding	2516	11	10	Medium Confidence
ENST00000220764.7	M8/D6	2	1.14222	0.191829	0.318298	ENST00000220764.7 M8/D6	0.0768916	ENSG00000104325.7	DECR1	protein_coding	DECR1-201	protein_coding	2760	10	9	Low Confidence
ENST00000220822.12	D5/D6	2	1.56718	0.647108	3.8416	ENST00000220822.12 D5/D6	0.0453854	ENSG00000104381.14	GDAP1	protein_coding	GDAP1-201	protein_coding	3645	6	5	Low Confidence
ENST00000220913.10	D5/D6	3	1.4118	0.496496	2.65991	ENST00000220913.10 D5/D6	0.00356783	ENSG00000104472.10	CHRAC1	protein_coding	CHRAC1-201	protein_coding	2481	3	2	Medium Confidence
ENST00000220913.10	F7/D6	3	0.757972	-0.399804	0.379544	ENST00000220913.10 F7/D6	0.0939285	ENSG00000104472.10	CHRAC1	protein_coding	CHRAC1-201	protein_coding	2481	3	2	High Confidence
ENST00000221114.8	D5/D6	3	0.932977	-0.100309	1.24858	ENST00000221114.8 D5/D6	0.0292749	ENSG00000104671.8	DCTN6	protein_coding	DCTN6-201	protein_coding	1054	7	6	High Confidence
ENST00000221130.11	D5/D6	3	1.11438	0.156205	0.537402	ENST00000221130.11 D5/D6	0.0859528	ENSG00000104687.14	GSR	protein_coding	GSR-201	protein_coding	3034	13	12	High Confidence
ENST00000221132.8	M8/D6	2	0.586379	-0.774844	8.10138	ENST00000221132.8 M8/D6	0.0335205	ENSG00000104689.10	TNFRSF10A	protein_coding	TNFRSF10A-201	protein_coding	2690	10	9	Low Confidence
ENST00000221233.9	D5/D6	3	1.96753	0.976374	0.301334	ENST00000221233.9 D5/D6	1.26539e-06	ENSG00000077348.10	EXOSC5	protein_coding	EXOSC5-201	protein_coding	998	6	5	High Confidence
ENST00000221283.10	F7/D6	2	0.8733	-0.195452	0.145047	ENST00000221283.10 F7/D6	0.0600552	ENSG00000076944.18	STXBP2	protein_coding	STXBP2-201	protein_coding	1885	19	18	Low Confidence
ENST00000221419.10	D5/D6	2	1.33068	0.411913	1.86519	ENST00000221419.10 D5/D6	0.107885	ENSG00000104824.18	HNRNPL	protein_coding	HNRNPL-201	protein_coding	2142	13	12	Medium Confidence
ENST00000221452.13	M8/D6	2	0.848332	-0.237496	1.65411	ENST00000221452.13 M8/D6	0.078878	ENSG00000104856.15	RELB	protein_coding	RELB-201	protein_coding	2258	12	11	Low Confidence
ENST00000221494.10	D5/D6	2	1.24924	0.321055	0.0591771	ENST00000221494.10 D5/D6	0.0483207	ENSG00000104897.10	SF3A2	protein_coding	SF3A2-201	protein_coding	1619	9	8	Low Confidence
ENST00000221494.10	M8/D6	2	1.19309	0.254598	1.17673	ENST00000221494.10 M8/D6	0.0405263	ENSG00000104897.10	SF3A2	protein_coding	SF3A2-201	protein_coding	1619	9	8	Low Confidence
ENST00000221543.10	D5/D6	2	0.81444	-0.296214	1.13979	ENST00000221543.10 D5/D6	0.0261406	ENSG00000104946.14	TBC1D17	protein_coding	TBC1D17-201	protein_coding	2095	17	16	Low Confidence
ENST00000221561.12	M8/D6	3	0.591357	-0.75869	2.34782	ENST00000221561.12 M8/D6	0.0282332	ENSG00000104964.15	TLE5	protein_coding	TLE5-201	protein_coding	1884	7	6	Medium Confidence
ENST00000221573.11	D5/D6	3	1.25296	0.325246	0.796936	ENST00000221573.11 D5/D6	0.0516705	ENSG00000104976.13	SNAPC2	protein_coding	SNAPC2-201	protein_coding	1520	5	4	High Confidence
ENST00000221801.8	D5/D6	4	1.50408	0.588863	0.28531	ENST00000221801.8 D5/D6	0.000253323	ENSG00000105202.9	FBL	protein_coding	FBL-201	protein_coding	1125	9	8	High Confidence
ENST00000221801.8	M8/D6	3	0.848798	-0.236517	0.277496	ENST00000221801.8 M8/D6	0.0559525	ENSG00000105202.9	FBL	protein_coding	FBL-201	protein_coding	1125	9	8	High Confidence
ENST00000221847.6	D5/D6	4	0.689204	-0.537275	1.1324	ENST00000221847.6 D5/D6	9.75285e-06	ENSG00000105246.6	EBI3	protein_coding	EBI3-201	protein_coding	1158	5	4	High Confidence
ENST00000221847.6	F7/D6	4	1.25089	0.32284	0.713756	ENST00000221847.6 F7/D6	0.00104993	ENSG00000105246.6	EBI3	protein_coding	EBI3-201	protein_coding	1158	5	4	High Confidence
ENST00000221847.6	M8/D6	3	0.81781	-0.290166	0.170181	ENST00000221847.6 M8/D6	0.00207284	ENSG00000105246.6	EBI3	protein_coding	EBI3-201	protein_coding	1158	5	4	High Confidence
ENST00000221855.8	F7/D6	2	0.802732	-0.317036	0.605821	ENST00000221855.8 F7/D6	0.10499	ENSG00000105254.12	TBCB	protein_coding	TBCB-201	protein_coding	987	6	5	Low Confidence
ENST00000221930.6	F7/D6	2	1.35792	0.44137	0.626952	ENST00000221930.6 F7/D6	0.0910153	ENSG00000105329.11	TGFB1	protein_coding	TGFB1-201	protein_coding	2780	7	6	Low Confidence
ENST00000221930.6	M8/D6	2	1.48721	0.572509	1.1951	ENST00000221930.6 M8/D6	0.0141013	ENSG00000105329.11	TGFB1	protein_coding	TGFB1-201	protein_coding	2780	7	6	Low Confidence
ENST00000221943.14	M8/D6	2	1.21071	0.275856	0.202406	ENST00000221943.14 M8/D6	0.113607	ENSG00000105341.19	DMAC2	protein_coding	DMAC2-201	protein_coding	1700	6	5	Low Confidence
ENST00000221957.9	D5/D6	4	1.46014	0.546068	0.434457	ENST00000221957.9 D5/D6	0.000356893	ENSG00000105355.9	PLIN3	protein_coding	PLIN3-201	protein_coding	2232	8	7	High Confidence
ENST00000221957.9	F7/D6	3	0.810035	-0.303983	0.519981	ENST00000221957.9 F7/D6	0.0155383	ENSG00000105355.9	PLIN3	protein_coding	PLIN3-201	protein_coding	2232	8	7	High Confidence
ENST00000221972.8	D5/D6	4	0.720687	-0.472697	0.813077	ENST00000221972.8 D5/D6	0.000111513	ENSG00000105369.10	CD79A	protein_coding	CD79A-201	protein_coding	1099	5	4	High Confidence
ENST00000221972.8	F7/D6	3	0.806467	-0.310353	0.531488	ENST00000221972.8 F7/D6	0.00223697	ENSG00000105369.10	CD79A	protein_coding	CD79A-201	protein_coding	1099	5	4	High Confidence
ENST00000222005.7	D5/D6	4	1.24734	0.31877	0.604429	ENST00000222005.7 D5/D6	0.0258185	ENSG00000105401.9	CDC37	protein_coding	CDC37-201	protein_coding	1618	8	7	High Confidence
ENST00000222008.11	D5/D6	3	0.637002	-0.650671	0.527713	ENST00000222008.11 D5/D6	0.00112254	ENSG00000105404.11	RABAC1	protein_coding	RABAC1-201	protein_coding	750	5	4	High Confidence
ENST00000222120.8	D5/D6	3	0.636281	-0.652357	0.804903	ENST00000222120.8 D5/D6	0.00493683	ENSG00000105514.8	RAB3D	protein_coding	RAB3D-201	protein_coding	4240	5	4	High Confidence
ENST00000222120.8	M8/D6	2	0.761759	-0.392938	2.18577	ENST00000222120.8 M8/D6	0.116079	ENSG00000105514.8	RAB3D	protein_coding	RAB3D-201	protein_coding	4240	5	4	Medium Confidence
ENST00000222214.10	M8/D6	2	0.763856	-0.39025	4.74095	ENST00000222214.10 M8/D6	0.034815	ENSG00000105607.13	GCDH	protein_coding	GCDH-201	protein_coding	1852	12	11	Low Confidence
ENST00000222256.9	M8/D6	3	1.67978	0.745503	4.39158	ENST00000222256.9 M8/D6	0.0506107	ENSG00000105649.10	RAB3A	protein_coding	RAB3A-201	protein_coding	1496	5	4	Low Confidence
ENST00000222284.10	D5/D6	2	1.21025	0.275207	1.1733	ENST00000222284.10 D5/D6	0.136642	ENSG00000105677.12	TMEM147	protein_coding	TMEM147-201	protein_coding	868	7	6	Low Confidence
ENST00000222307.9	M8/D6	3	0.778362	-0.36185	1.59013	ENST00000222307.9 M8/D6	0.00535195	ENSG00000105700.11	KXD1	protein_coding	KXD1-201	protein_coding	1344	5	4	High Confidence
ENST00000222329.9	D5/D6	2	1.52752	0.61119	0.177342	ENST00000222329.9 D5/D6	0.0232786	ENSG00000105722.10	ERF	protein_coding	ERF-201	protein_coding	2672	4	3	Low Confidence
ENST00000222329.9	M8/D6	2	1.53863	0.621571	1.02678	ENST00000222329.9 M8/D6	0.0165926	ENSG00000105722.10	ERF	protein_coding	ERF-201	protein_coding	2672	4	3	Low Confidence
ENST00000222543.11	D5/D6	3	2.33	1.22008	1.31963	ENST00000222543.11 D5/D6	0.00621513	ENSG00000105825.14	TFPI2	protein_coding	TFPI2-201	protein_coding	2207	5	4	High Confidence
ENST00000222553.8	M8/D6	2	0.923933	-0.114171	0.659272	ENST00000222553.8 M8/D6	0.0547557	ENSG00000105835.13	NAMPT	protein_coding	NAMPT-201	protein_coding	4360	11	10	Low Confidence
ENST00000222567.6	M8/D6	2	0.830124	-0.268602	0.0846628	ENST00000222567.6 M8/D6	0.0606487	ENSG00000105849.6	POLR1F	protein_coding	POLR1F-201	protein_coding	3893	4	3	Low Confidence
ENST00000222584.8	D5/D6	3	1.97604	0.976261	6.69105	ENST00000222584.8 D5/D6	0.00386272	ENSG00000105866.15	SP4	protein_coding	SP4-201	protein_coding	6077	6	5	Low Confidence
ENST00000222747.8	D5/D6	4	0.706833	-0.500725	0.869837	ENST00000222747.8 D5/D6	0.0140753	ENSG00000106025.9	TSPAN12	protein_coding	TSPAN12-201	protein_coding	2585	8	7	High Confidence
ENST00000222803.10	F7/D6	2	1.37676	0.461077	1.65022	ENST00000222803.10 F7/D6	0.0651189	ENSG00000106080.11	FKBP14	protein_coding	FKBP14-201	protein_coding	4978	4	3	Low Confidence
ENST00000222969.10	D5/D6	3	0.737479	-0.439364	0.508823	ENST00000222969.10 D5/D6	0.000583606	ENSG00000106245.11	BUD31	protein_coding	BUD31-201	protein_coding	1052	6	5	High Confidence
ENST00000222990.8	D5/D6	3	1.33906	0.42043	2.32567	ENST00000222990.8 D5/D6	0.00586339	ENSG00000106266.11	SNX8	protein_coding	SNX8-201	protein_coding	4704	11	10	Medium Confidence
ENST00000222990.8	F7/D6	3	0.803451	-0.317062	3.0372	ENST00000222990.8 F7/D6	0.0244146	ENSG00000106266.11	SNX8	protein_coding	SNX8-201	protein_coding	4704	11	10	Medium Confidence
ENST00000222990.8	M8/D6	2	1.23102	0.299093	3.24802	ENST00000222990.8 M8/D6	0.0364172	ENSG00000106266.11	SNX8	protein_coding	SNX8-201	protein_coding	4704	11	10	Medium Confidence
ENST00000223023.5	D5/D6	2	1.36156	0.443742	4.58238	ENST00000223023.5 D5/D6	0.0361521	ENSG00000106299.8	WASL	protein_coding	WASL-201	protein_coding	4363	11	10	Low Confidence
ENST00000223023.5	F7/D6	2	1.26957	0.343304	3.79513	ENST00000223023.5 F7/D6	0.0698617	ENSG00000106299.8	WASL	protein_coding	WASL-201	protein_coding	4363	11	10	Low Confidence
ENST00000223026.9	D5/D6	2	1.51738	0.596578	8.31614	ENST00000223026.9 D5/D6	0.0624229	ENSG00000106302.10	HYAL4	protein_coding	HYAL4-201	protein_coding	2410	5	4	Low Confidence
ENST00000223026.9	F7/D6	3	2.12045	1.08216	3.86757	ENST00000223026.9 F7/D6	0.00335469	ENSG00000106302.10	HYAL4	protein_coding	HYAL4-201	protein_coding	2410	5	4	Low Confidence
ENST00000223026.9	M8/D6	3	0.599919	-0.744163	7.01153	ENST00000223026.9 M8/D6	0.056115	ENSG00000106302.10	HYAL4	protein_coding	HYAL4-201	protein_coding	2410	5	4	Low Confidence
ENST00000223029.8	D5/D6	3	1.44821	0.534247	0.374328	ENST00000223029.8 D5/D6	0.00156241	ENSG00000106305.10	AIMP2	protein_coding	AIMP2-201	protein_coding	1198	4	3	High Confidence
ENST00000223273.7	M8/D6	2	0.721143	-0.471821	1.56804	ENST00000223273.7 M8/D6	0.0788899	ENSG00000241127.8	YAE1	protein_coding	YAE1-201	protein_coding	871	3	2	Low Confidence
ENST00000223293.10	D5/D6	3	1.65544	0.72713	0.773662	ENST00000223293.10 D5/D6	0.000221827	ENSG00000106560.11	GIMAP2	protein_coding	GIMAP2-201	protein_coding	1443	3	2	High Confidence
ENST00000223321.9	D5/D6	3	0.930377	-0.104281	1.07619	ENST00000223321.9 D5/D6	0.00634096	ENSG00000106588.12	PSMA2	protein_coding	PSMA2-201	protein_coding	1434	8	7	High Confidence
ENST00000223324.3	F7/D6	3	0.808434	-0.3068	0.125279	ENST00000223324.3 F7/D6	0.00872503	ENSG00000106591.4	MRPL32	protein_coding	MRPL32-201	protein_coding	859	3	2	High Confidence
ENST00000223324.3	M8/D6	3	0.822272	-0.28232	0.236944	ENST00000223324.3 M8/D6	0.0337135	ENSG00000106591.4	MRPL32	protein_coding	MRPL32-201	protein_coding	859	3	2	High Confidence
ENST00000223336.11	D5/D6	4	0.811371	-0.30205	1.49288	ENST00000223336.11 D5/D6	0.0430018	ENSG00000106603.20	COA1	protein_coding	COA1-201	protein_coding	899	6	5	High Confidence
ENST00000223336.11	F7/D6	3	1.2098	0.274729	0.544943	ENST00000223336.11 F7/D6	0.0469507	ENSG00000106603.20	COA1	protein_coding	COA1-201	protein_coding	899	6	5	High Confidence
ENST00000223336.11	M8/D6	4	0.656746	-0.607664	2.20261	ENST00000223336.11 M8/D6	0.00745963	ENSG00000106603.20	COA1	protein_coding	COA1-201	protein_coding	899	6	5	Medium Confidence
ENST00000223369.3	D5/D6	3	0.837807	-0.25575	1.7504	ENST00000223369.3 D5/D6	0.0373321	ENSG00000106636.9	YKT6	protein_coding	YKT6-201	protein_coding	2767	7	6	High Confidence
ENST00000223641.5	D5/D6	4	0.670997	-0.575657	0.398854	ENST00000223641.5 D5/D6	0.000241538	ENSG00000106803.10	SEC61B	protein_coding	SEC61B-201	protein_coding	564	4	3	High Confidence
ENST00000223641.5	F7/D6	2	1.04669	0.065828	0.338666	ENST00000223641.5 F7/D6	0.339657	ENSG00000106803.10	SEC61B	protein_coding	SEC61B-201	protein_coding	564	4	3	Low Confidence
ENST00000223641.5	M8/D6	4	0.725626	-0.463616	2.07653	ENST00000223641.5 M8/D6	0.000453598	ENSG00000106803.10	SEC61B	protein_coding	SEC61B-201	protein_coding	564	4	3	Medium Confidence
ENST00000223864.7	M8/D6	4	0.808916	-0.306923	2.15337	ENST00000223864.7 M8/D6	0.0168577	ENSG00000107020.10	PLGRKT	protein_coding	PLGRKT-201	protein_coding	981	6	5	Medium Confidence
ENST00000224073.6	D5/D6	4	0.820214	-0.285955	0.346126	ENST00000224073.6 D5/D6	0.010789	ENSG00000107223.13	EDF1	protein_coding	EDF1-201	protein_coding	662	5	4	High Confidence
ENST00000224073.6	F7/D6	2	0.873561	-0.195023	0.237233	ENST00000224073.6 F7/D6	0.0532515	ENSG00000107223.13	EDF1	protein_coding	EDF1-201	protein_coding	662	5	4	Low Confidence
ENST00000224073.6	M8/D6	4	0.804878	-0.313182	0.33168	ENST00000224073.6 M8/D6	0.00236556	ENSG00000107223.13	EDF1	protein_coding	EDF1-201	protein_coding	662	5	4	High Confidence
ENST00000224140.6	F7/D6	3	0.766845	-0.383404	1.67845	ENST00000224140.6 F7/D6	0.00262586	ENSG00000107290.14	SETX	protein_coding	SETX-201	protein_coding	11101	26	25	High Confidence
ENST00000224237.9	D5/D6	2	1.4239	0.509826	0.524958	ENST00000224237.9 D5/D6	0.00543791	ENSG00000026025.16	VIM	protein_coding	VIM-201	protein_coding	1868	9	8	Low Confidence
ENST00000224237.9	F7/D6	3	0.404644	-1.30847	4.77338	ENST00000224237.9 F7/D6	3.44506e-05	ENSG00000026025.16	VIM	protein_coding	VIM-201	protein_coding	1868	9	8	Low Confidence
ENST00000224237.9	M8/D6	2	3.01963	1.59437	0.123902	ENST00000224237.9 M8/D6	1.24762e-06	ENSG00000026025.16	VIM	protein_coding	VIM-201	protein_coding	1868	9	8	Low Confidence
ENST00000224337.10	F7/D6	3	0.733094	-0.448771	2.40364	ENST00000224337.10 F7/D6	0.000723511	ENSG00000095585.18	BLNK	protein_coding	BLNK-201	protein_coding	4344	17	16	Medium Confidence
ENST00000224337.10	M8/D6	3	0.698011	-0.518745	0.67367	ENST00000224337.10 M8/D6	0.000491346	ENSG00000095585.18	BLNK	protein_coding	BLNK-201	protein_coding	4344	17	16	High Confidence
ENST00000224652.12	D5/D6	3	1.32025	0.39969	2.76897	ENST00000224652.12 D5/D6	0.114801	ENSG00000107669.19	ATE1	protein_coding	ATE1-201	protein_coding	4895	12	11	Medium Confidence
ENST00000224652.12	F7/D6	2	0.658771	-0.602186	0.688309	ENST00000224652.12 F7/D6	0.0510425	ENSG00000107669.19	ATE1	protein_coding	ATE1-201	protein_coding	4895	12	11	Low Confidence
ENST00000225174.8	D5/D6	3	1.13214	0.178988	0.697487	ENST00000225174.8 D5/D6	0.181822	ENSG00000108179.14	PPIF	protein_coding	PPIF-201	protein_coding	2196	6	5	High Confidence
ENST00000225174.8	M8/D6	3	0.823668	-0.280495	2.10437	ENST00000225174.8 M8/D6	0.0244024	ENSG00000108179.14	PPIF	protein_coding	PPIF-201	protein_coding	2196	6	5	Medium Confidence
ENST00000225235.5	M8/D6	2	0.448117	-1.16024	5.5044	ENST00000225235.5 M8/D6	0.00203396	ENSG00000108239.9	TBC1D12	protein_coding	TBC1D12-201	protein_coding	5637	13	12	Low Confidence
ENST00000225296.8	D5/D6	3	1.62858	0.703613	0.181103	ENST00000225296.8 D5/D6	0.0125401	ENSG00000005100.13	DHX33	protein_coding	DHX33-201	protein_coding	5535	12	11	High Confidence
ENST00000225298.12	D5/D6	3	1.31099	0.390657	0.057955	ENST00000225298.12 D5/D6	0.00383777	ENSG00000011260.14	UTP18	protein_coding	UTP18-201	protein_coding	1876	14	13	High Confidence
ENST00000225308.12	D5/D6	3	1.27398	0.349299	0.557855	ENST00000225308.12 D5/D6	0.00643461	ENSG00000013306.16	SLC25A39	protein_coding	SLC25A39-201	protein_coding	1607	12	11	High Confidence
ENST00000225308.12	M8/D6	3	0.85246	-0.2305	1.19443	ENST00000225308.12 M8/D6	0.0477889	ENSG00000013306.16	SLC25A39	protein_coding	SLC25A39-201	protein_coding	1607	12	11	High Confidence
ENST00000225328.10	D5/D6	3	0.413734	-1.28098	7.3189	ENST00000225328.10 D5/D6	2.16144e-06	ENSG00000083454.23	P2RX5	protein_coding	P2RX5-201	protein_coding	2060	12	11	Low Confidence
ENST00000225328.10	M8/D6	3	0.351799	-1.51096	5.08483	ENST00000225328.10 M8/D6	2.78665e-07	ENSG00000083454.23	P2RX5	protein_coding	P2RX5-201	protein_coding	2060	12	11	Low Confidence
ENST00000225388.9	D5/D6	3	1.32481	0.405564	1.23877	ENST00000225388.9 D5/D6	0.00261613	ENSG00000108256.9	NUFIP2	protein_coding	NUFIP2-201	protein_coding	10877	4	3	High Confidence
ENST00000225394.8	D5/D6	2	1.73204	0.792425	0.812094	ENST00000225394.8 D5/D6	0.00803672	ENSG00000108262.16	GIT1	protein_coding	GIT1-201	protein_coding	3783	20	19	Low Confidence
ENST00000225430.9	D5/D6	3	1.21106	0.276262	0.252962	ENST00000225430.9 D5/D6	0.000453955	ENSG00000108298.12	RPL19	protein_coding	RPL19-201	protein_coding	737	6	5	High Confidence
ENST00000225430.9	F7/D6	3	1.06645	0.0928063	0.247442	ENST00000225430.9 F7/D6	0.218253	ENSG00000108298.12	RPL19	protein_coding	RPL19-201	protein_coding	737	6	5	High Confidence
ENST00000225504.8	F7/D6	2	0.797157	-0.327462	2.34806	ENST00000225504.8 F7/D6	0.00664055	ENSG00000213246.7	SUPT4H1	protein_coding	SUPT4H1-201	protein_coding	1488	5	4	Medium Confidence
ENST00000225525.4	D5/D6	3	0.731745	-0.450835	1.31457	ENST00000225525.4 D5/D6	0.0792379	ENSG00000213977.8	TAX1BP3	protein_coding	TAX1BP3-201	protein_coding	1280	4	3	High Confidence
ENST00000225525.4	M8/D6	3	1.54563	0.619745	7.53104	ENST00000225525.4 M8/D6	0.00695513	ENSG00000213977.8	TAX1BP3	protein_coding	TAX1BP3-201	protein_coding	1280	4	3	Low Confidence
ENST00000225538.4	D5/D6	2	0.223396	-2.16372	4.39584	ENST00000225538.4 D5/D6	0.000525157	ENSG00000108405.4	P2RX1	protein_coding	P2RX1-201	protein_coding	2662	12	11	Low Confidence
ENST00000225609.10	D5/D6	2	0.576039	-0.797716	5.20151	ENST00000225609.10 D5/D6	0.0780793	ENSG00000108474.17	PIGL	protein_coding	PIGL-201	protein_coding	1289	7	6	Low Confidence
ENST00000225655.6	D5/D6	3	1.00667	0.00955832	0.493892	ENST00000225655.6 D5/D6	0.0140619	ENSG00000108518.8	PFN1	protein_coding	PFN1-201	protein_coding	807	3	2	High Confidence
ENST00000225698.8	D5/D6	4	1.59507	0.673583	0.417103	ENST00000225698.8 D5/D6	1.46912e-05	ENSG00000108561.8	C1QBP	protein_coding	C1QBP-201	protein_coding	1169	6	5	High Confidence
ENST00000225719.9	D5/D6	3	1.40864	0.49246	3.61676	ENST00000225719.9 D5/D6	0.029575	ENSG00000108582.12	CPD	protein_coding	CPD-201	protein_coding	9372	21	20	Medium Confidence
ENST00000225777.8	D5/D6	3	0.879284	-0.185647	0.573679	ENST00000225777.8 D5/D6	0.00908989	ENSG00000108639.8	SYNGR2	protein_coding	SYNGR2-201	protein_coding	1495	4	3	High Confidence
ENST00000225777.8	F7/D6	3	0.706612	-0.501048	0.51844	ENST00000225777.8 F7/D6	1.10953e-05	ENSG00000108639.8	SYNGR2	protein_coding	SYNGR2-201	protein_coding	1495	4	3	High Confidence
ENST00000225792.10	F7/D6	3	0.80256	-0.3279	8.32183	ENST00000225792.10 F7/D6	0.00630209	ENSG00000108654.16	DDX5	protein_coding	DDX5-201	protein_coding	3684	13	12	Low Confidence
ENST00000225792.10	M8/D6	2	0.857356	-0.222049	0.445715	ENST00000225792.10 M8/D6	0.0107404	ENSG00000108654.16	DDX5	protein_coding	DDX5-201	protein_coding	3684	13	12	Low Confidence
ENST00000225916.10	D5/D6	3	1.4561	0.541541	1.98497	ENST00000225916.10 D5/D6	0.0494874	ENSG00000108773.11	KAT2A	protein_coding	KAT2A-201	protein_coding	3115	18	17	Medium Confidence
ENST00000225941.6	D5/D6	4	1.31359	0.393243	1.12275	ENST00000225941.6 D5/D6	0.0374399	ENSG00000108798.9	ABI3	protein_coding	ABI3-201	protein_coding	1629	8	7	High Confidence
ENST00000225941.6	M8/D6	4	1.43935	0.52515	1.11014	ENST00000225941.6 M8/D6	0.00459503	ENSG00000108798.9	ABI3	protein_coding	ABI3-201	protein_coding	1629	8	7	High Confidence
ENST00000225964.10	D5/D6	2	0.404404	-1.30613	0.158086	ENST00000225964.10 D5/D6	0.0130017	ENSG00000108821.14	COL1A1	protein_coding	COL1A1-201	protein_coding	5914	51	50	Low Confidence
ENST00000225964.10	F7/D6	2	1.51842	0.60235	1.7501	ENST00000225964.10 F7/D6	0.0306223	ENSG00000108821.14	COL1A1	protein_coding	COL1A1-201	protein_coding	5914	51	50	Low Confidence
ENST00000225964.10	M8/D6	2	0.569416	-0.812899	2.50974	ENST00000225964.10 M8/D6	0.130795	ENSG00000108821.14	COL1A1	protein_coding	COL1A1-201	protein_coding	5914	51	50	Medium Confidence
ENST00000225972.8	M8/D6	2	0.844741	-0.243422	0.161537	ENST00000225972.8 M8/D6	0.0283409	ENSG00000108829.10	LRRC59	protein_coding	LRRC59-201	protein_coding	2880	7	6	Low Confidence
ENST00000226230.8	D5/D6	3	1.32215	0.402724	1.0772	ENST00000226230.8 D5/D6	0.00666763	ENSG00000109084.14	TMEM97	protein_coding	TMEM97-201	protein_coding	2463	3	2	High Confidence
ENST00000226230.8	M8/D6	2	1.24702	0.315382	6.55232	ENST00000226230.8 M8/D6	0.0351082	ENSG00000109084.14	TMEM97	protein_coding	TMEM97-201	protein_coding	2463	3	2	Low Confidence
ENST00000226253.9	D5/D6	4	0.421345	-1.24733	1.35682	ENST00000226253.9 D5/D6	6.27559e-06	ENSG00000109107.14	ALDOC	protein_coding	ALDOC-201	protein_coding	1608	9	8	High Confidence
ENST00000226253.9	F7/D6	3	1.29843	0.37662	1.02657	ENST00000226253.9 F7/D6	0.00791867	ENSG00000109107.14	ALDOC	protein_coding	ALDOC-201	protein_coding	1608	9	8	High Confidence
ENST00000226253.9	M8/D6	3	1.39698	0.482152	1.04554	ENST00000226253.9 M8/D6	0.00433687	ENSG00000109107.14	ALDOC	protein_coding	ALDOC-201	protein_coding	1608	9	8	High Confidence
ENST00000226279.8	D5/D6	4	0.702998	-0.508904	1.52238	ENST00000226279.8 D5/D6	0.000754061	ENSG00000004468.13	CD38	protein_coding	CD38-201	protein_coding	5620	8	7	High Confidence
ENST00000226279.8	F7/D6	4	0.571202	-0.813698	5.15464	ENST00000226279.8 F7/D6	2.91262e-05	ENSG00000004468.13	CD38	protein_coding	CD38-201	protein_coding	5620	8	7	Low Confidence
ENST00000226299.9	D5/D6	2	1.15984	0.213911	0.421531	ENST00000226299.9 D5/D6	0.117878	ENSG00000002549.13	LAP3	protein_coding	LAP3-201	protein_coding	2209	13	12	Low Confidence
ENST00000226760.5	D5/D6	2	0.480675	-1.05923	5.7179	ENST00000226760.5 D5/D6	0.0116876	ENSG00000109501.15	WFS1	protein_coding	WFS1-201	protein_coding	3640	8	7	Low Confidence
ENST00000226760.5	M8/D6	3	0.492586	-1.02205	1.85915	ENST00000226760.5 M8/D6	0.0287921	ENSG00000109501.15	WFS1	protein_coding	WFS1-201	protein_coding	3640	8	7	Medium Confidence
ENST00000226796.7	D5/D6	4	1.65346	0.714566	7.40333	ENST00000226796.7 D5/D6	0.00495537	ENSG00000109534.17	GAR1	protein_coding	GAR1-201	protein_coding	1015	7	6	Low Confidence
ENST00000226951.11	D5/D6	2	0.662696	-0.595607	5.29589	ENST00000226951.11 D5/D6	0.020474	ENSG00000109684.16	CLNK	protein_coding	CLNK-201	protein_coding	5502	19	18	Low Confidence
ENST00000226951.11	F7/D6	2	0.338253	-1.56516	4.3048	ENST00000226951.11 F7/D6	0.000423416	ENSG00000109684.16	CLNK	protein_coding	CLNK-201	protein_coding	5502	19	18	Low Confidence
ENST00000227155.9	D5/D6	4	0.488859	-1.03354	2.16018	ENST00000227155.9 D5/D6	5.04096e-06	ENSG00000085117.12	CD82	protein_coding	CD82-201	protein_coding	2212	10	9	Medium Confidence
ENST00000227155.9	F7/D6	2	1.32209	0.400067	6.17062	ENST00000227155.9 F7/D6	0.0054905	ENSG00000085117.12	CD82	protein_coding	CD82-201	protein_coding	2212	10	9	Low Confidence
ENST00000227266.10	F7/D6	3	2.02039	1.01459	0.573639	ENST00000227266.10 F7/D6	1.01578e-05	ENSG00000109861.17	CTSC	protein_coding	CTSC-201	protein_coding	1870	7	6	High Confidence
ENST00000227266.10	M8/D6	3	0.773583	-0.370452	0.746115	ENST00000227266.10 M8/D6	0.0305553	ENSG00000109861.17	CTSC	protein_coding	CTSC-201	protein_coding	1870	7	6	High Confidence
ENST00000227322.8	M8/D6	2	0.921349	-0.118195	0.454963	ENST00000227322.8 M8/D6	0.0910945	ENSG00000109917.11	ZPR1	protein_coding	ZPR1-201	protein_coding	6539	14	13	Low Confidence
ENST00000227451.4	D5/D6	2	2.38931	1.25645	1.40358	ENST00000227451.4 D5/D6	3.05658e-05	ENSG00000110042.8	DTX4	protein_coding	DTX4-201	protein_coding	6003	9	8	Low Confidence
ENST00000227451.4	F7/D6	2	1.74866	0.806231	0.549649	ENST00000227451.4 F7/D6	0.00292492	ENSG00000110042.8	DTX4	protein_coding	DTX4-201	protein_coding	6003	9	8	Low Confidence
ENST00000227451.4	M8/D6	2	0.773871	-0.369837	0.124201	ENST00000227451.4 M8/D6	0.0552279	ENSG00000110042.8	DTX4	protein_coding	DTX4-201	protein_coding	6003	9	8	Low Confidence
ENST00000227471.7	D5/D6	3	1.26749	0.341888	0.754599	ENST00000227471.7 D5/D6	0.141226	ENSG00000110057.9	UNC93B1	protein_coding	UNC93B1-201	protein_coding	2294	11	10	High Confidence
ENST00000227471.7	F7/D6	3	0.885099	-0.176186	0.81404	ENST00000227471.7 F7/D6	0.0459575	ENSG00000110057.9	UNC93B1	protein_coding	UNC93B1-201	protein_coding	2294	11	10	High Confidence
ENST00000227474.8	M8/D6	3	0.796787	-0.32884	2.78458	ENST00000227474.8 M8/D6	0.23422	ENSG00000110060.9	PUS3	protein_coding	PUS3-201	protein_coding	1829	4	3	Medium Confidence
ENST00000227503.13	F7/D6	2	0.793302	-0.334784	3.17099	ENST00000227503.13 F7/D6	0.0491692	ENSG00000168066.22	SF1	protein_coding	SF1-201	protein_coding	2850	13	12	Medium Confidence
ENST00000227507.3	D5/D6	3	0.417806	-1.26003	2.56608	ENST00000227507.3 D5/D6	0.00184541	ENSG00000110092.4	CCND1	protein_coding	CCND1-201	protein_coding	4238	5	4	Medium Confidence
ENST00000227507.3	M8/D6	3	1.28279	0.358956	1.50283	ENST00000227507.3 M8/D6	0.506492	ENSG00000110092.4	CCND1	protein_coding	CCND1-201	protein_coding	4238	5	4	High Confidence
ENST00000227520.10	D5/D6	4	1.45954	0.545465	0.498173	ENST00000227520.10 D5/D6	0.0132112	ENSG00000110104.13	CCDC86	protein_coding	CCDC86-201	protein_coding	1851	4	3	High Confidence
ENST00000227525.8	F7/D6	3	0.737775	-0.438873	0.932776	ENST00000227525.8 F7/D6	0.00373657	ENSG00000110108.10	TMEM109	protein_coding	TMEM109-201	protein_coding	2129	4	3	High Confidence
ENST00000227525.8	M8/D6	3	0.84376	-0.245112	0.336129	ENST00000227525.8 M8/D6	0.0300966	ENSG00000110108.10	TMEM109	protein_coding	TMEM109-201	protein_coding	2129	4	3	High Confidence
ENST00000227752.8	D5/D6	4	0.632174	-0.664363	3.58333	ENST00000227752.8 D5/D6	0.0376704	ENSG00000110324.12	IL10RA	protein_coding	IL10RA-201	protein_coding	3653	7	6	Medium Confidence
ENST00000227752.8	F7/D6	3	0.771286	-0.374726	0.668465	ENST00000227752.8 F7/D6	0.010525	ENSG00000110324.12	IL10RA	protein_coding	IL10RA-201	protein_coding	3653	7	6	High Confidence
ENST00000227756.5	F7/D6	4	3.5324	1.81765	3.72585	ENST00000227756.5 F7/D6	0.0021167	ENSG00000110328.6	GALNT18	protein_coding	GALNT18-201	protein_coding	2503	11	10	Low Confidence
ENST00000227758.7	D5/D6	3	0.743613	-0.430937	4.88065	ENST00000227758.7 D5/D6	0.0147393	ENSG00000110330.10	BIRC2	protein_coding	BIRC2-201	protein_coding	3764	9	8	Low Confidence
ENST00000227758.7	F7/D6	3	1.22855	0.296632	1.50645	ENST00000227758.7 F7/D6	0.0458059	ENSG00000110330.10	BIRC2	protein_coding	BIRC2-201	protein_coding	3764	9	8	High Confidence
ENST00000227758.7	M8/D6	2	0.858572	-0.220001	0.411355	ENST00000227758.7 M8/D6	0.140391	ENSG00000110330.10	BIRC2	protein_coding	BIRC2-201	protein_coding	3764	9	8	Low Confidence
ENST00000228136.9	F7/D6	2	0.892473	-0.165041	3.57229	ENST00000228136.9 F7/D6	0.0918356	ENSG00000110696.10	C11orf58	protein_coding	C11orf58-201	protein_coding	3920	5	4	Medium Confidence
ENST00000228251.9	D5/D6	3	1.58317	0.661879	2.56075	ENST00000228251.9 D5/D6	0.00675226	ENSG00000060138.13	YBX3	protein_coding	YBX3-201	protein_coding	1931	10	9	Medium Confidence
ENST00000228306.8	D5/D6	3	1.36252	0.445797	1.84158	ENST00000228306.8 D5/D6	0.0001364	ENSG00000089157.16	RPLP0	protein_coding	RPLP0-201	protein_coding	1257	8	7	Medium Confidence
ENST00000228306.8	F7/D6	2	1.10992	0.150345	1.25048	ENST00000228306.8 F7/D6	0.15367	ENSG00000089157.16	RPLP0	protein_coding	RPLP0-201	protein_coding	1257	8	7	Low Confidence
ENST00000228306.8	M8/D6	3	0.879722	-0.185033	1.02711	ENST00000228306.8 M8/D6	0.153789	ENSG00000089157.16	RPLP0	protein_coding	RPLP0-201	protein_coding	1257	8	7	High Confidence
ENST00000228347.9	D5/D6	2	1.23194	0.300879	0.835799	ENST00000228347.9 D5/D6	0.20383	ENSG00000013503.10	POLR3B	protein_coding	POLR3B-201	protein_coding	4183	28	27	Low Confidence
ENST00000228434.7	D5/D6	4	0.561411	-0.832932	0.530797	ENST00000228434.7 D5/D6	8.56674e-05	ENSG00000110848.8	CD69	protein_coding	CD69-201	protein_coding	1676	5	4	High Confidence
ENST00000228434.7	F7/D6	4	0.709341	-0.495566	0.736903	ENST00000228434.7 F7/D6	0.00143594	ENSG00000110848.8	CD69	protein_coding	CD69-201	protein_coding	1676	5	4	High Confidence
ENST00000228434.7	M8/D6	4	0.692951	-0.529492	1.21848	ENST00000228434.7 M8/D6	0.00201956	ENSG00000110848.8	CD69	protein_coding	CD69-201	protein_coding	1676	5	4	High Confidence
ENST00000228438.3	D5/D6	3	0.324201	-1.62661	3.33614	ENST00000228438.3 D5/D6	6.88298e-05	ENSG00000110852.5	CLEC2B	protein_coding	CLEC2B-201	protein_coding	1533	5	4	Medium Confidence
ENST00000228438.3	F7/D6	3	0.436187	-1.20637	8.25986	ENST00000228438.3 F7/D6	0.000106586	ENSG00000110852.5	CLEC2B	protein_coding	CLEC2B-201	protein_coding	1533	5	4	Low Confidence
ENST00000228438.3	M8/D6	2	0.249152	-2.00506	1.46518	ENST00000228438.3 M8/D6	9.08943e-05	ENSG00000110852.5	CLEC2B	protein_coding	CLEC2B-201	protein_coding	1533	5	4	Low Confidence
ENST00000228506.8	M8/D6	2	0.843713	-0.245459	1.97784	ENST00000228506.8 M8/D6	0.0861916	ENSG00000110917.8	MLEC	protein_coding	MLEC-201	protein_coding	6341	5	4	Medium Confidence
ENST00000228510.8	D5/D6	2	0.742866	-0.428943	1.27537	ENST00000228510.8 D5/D6	0.0489584	ENSG00000110921.14	MVK	protein_coding	MVK-201	protein_coding	2833	11	10	Low Confidence
ENST00000228534.6	D5/D6	3	0.443778	-1.17236	1.37014	ENST00000228534.6 D5/D6	0.00543805	ENSG00000110944.9	IL23A	protein_coding	IL23A-201	protein_coding	1037	4	3	High Confidence
ENST00000228534.6	F7/D6	3	1.95861	0.969585	1.30995	ENST00000228534.6 F7/D6	0.000544791	ENSG00000110944.9	IL23A	protein_coding	IL23A-201	protein_coding	1037	4	3	High Confidence
ENST00000228534.6	M8/D6	3	0.667167	-0.58415	1.35883	ENST00000228534.6 M8/D6	0.0729761	ENSG00000110944.9	IL23A	protein_coding	IL23A-201	protein_coding	1037	4	3	High Confidence
ENST00000228641.4	M8/D6	2	3.3409	1.73975	2.60384	ENST00000228641.4 M8/D6	0.01977	ENSG00000111046.4	MYF6	protein_coding	MYF6-201	protein_coding	1329	3	2	Medium Confidence
ENST00000228705.7	D5/D6	2	2.26261	1.17581	5.48483	ENST00000228705.7 D5/D6	0.0996478	ENSG00000111110.12	PPM1H	protein_coding	PPM1H-201	protein_coding	6454	10	9	Low Confidence
ENST00000228740.7	M8/D6	3	0.85569	-0.234704	8.46604	ENST00000228740.7 M8/D6	0.0262323	ENSG00000111144.10	LTA4H	protein_coding	LTA4H-201	protein_coding	2140	19	18	Low Confidence
ENST00000228741.8	M8/D6	4	0.462409	-1.11384	2.2192	ENST00000228741.8 M8/D6	0.00703133	ENSG00000111145.8	ELK3	protein_coding	ELK3-201	protein_coding	4201	5	4	Medium Confidence
ENST00000228825.12	D5/D6	3	0.998433	-0.00230614	0.548344	ENST00000228825.12 D5/D6	0.0219485	ENSG00000111229.16	ARPC3	protein_coding	ARPC3-201	protein_coding	946	7	6	High Confidence
ENST00000228825.12	F7/D6	3	0.865182	-0.208934	0.246434	ENST00000228825.12 F7/D6	0.0207626	ENSG00000111229.16	ARPC3	protein_coding	ARPC3-201	protein_coding	946	7	6	High Confidence
ENST00000228825.12	M8/D6	3	0.854217	-0.227621	1.42276	ENST00000228825.12 M8/D6	0.0100574	ENSG00000111229.16	ARPC3	protein_coding	ARPC3-201	protein_coding	946	7	6	High Confidence
ENST00000228827.8	D5/D6	2	1.2171	0.283442	0.160762	ENST00000228827.8 D5/D6	0.144838	ENSG00000111231.9	GPN3	protein_coding	GPN3-201	protein_coding	1457	8	7	Low Confidence
ENST00000228918.9	D5/D6	4	0.390968	-1.35764	3.5571	ENST00000228918.9 D5/D6	0.00161193	ENSG00000111321.11	LTBR	protein_coding	LTBR-201	protein_coding	2134	10	9	Medium Confidence
ENST00000228918.9	M8/D6	4	2.58072	1.36726	1.55535	ENST00000228918.9 M8/D6	0.000508306	ENSG00000111321.11	LTBR	protein_coding	LTBR-201	protein_coding	2134	10	9	High Confidence
ENST00000228945.9	F7/D6	3	0.829412	-0.269866	0.427965	ENST00000228945.9 F7/D6	0.00550156	ENSG00000111348.9	ARHGDIB	protein_coding	ARHGDIB-201	protein_coding	1174	6	5	High Confidence
ENST00000229195.8	F7/D6	2	0.861693	-0.214897	1.40502	ENST00000229195.8 F7/D6	0.0340466	ENSG00000111596.14	CNOT2	protein_coding	CNOT2-201	protein_coding	2844	16	15	Low Confidence
ENST00000229214.9	F7/D6	3	0.860798	-0.216537	1.39896	ENST00000229214.9 F7/D6	0.0607101	ENSG00000111615.14	KRR1	protein_coding	KRR1-201	protein_coding	10104	10	9	High Confidence
ENST00000229238.5	F7/D6	3	0.824679	-0.278172	0.731498	ENST00000229238.5 F7/D6	0.0330775	ENSG00000111639.8	MRPL51	protein_coding	MRPL51-201	protein_coding	898	3	2	High Confidence
ENST00000229238.5	M8/D6	3	0.806438	-0.310628	1.34918	ENST00000229238.5 M8/D6	0.0163231	ENSG00000111639.8	MRPL51	protein_coding	MRPL51-201	protein_coding	898	3	2	High Confidence
ENST00000229239.10	D5/D6	2	1.07122	0.0992462	0.202248	ENST00000229239.10 D5/D6	0.0615574	ENSG00000111640.15	GAPDH	protein_coding	GAPDH-201	protein_coding	1285	9	8	Low Confidence
ENST00000229239.10	F7/D6	4	1.21782	0.284271	0.340239	ENST00000229239.10 F7/D6	0.0106584	ENSG00000111640.15	GAPDH	protein_coding	GAPDH-201	protein_coding	1285	9	8	High Confidence
ENST00000229239.10	M8/D6	4	1.23968	0.309957	0.269291	ENST00000229239.10 M8/D6	0.00136129	ENSG00000111640.15	GAPDH	protein_coding	GAPDH-201	protein_coding	1285	9	8	High Confidence
ENST00000229277.6	D5/D6	2	0.55157	-0.860267	5.10518	ENST00000229277.6 D5/D6	1.40116e-05	ENSG00000111674.9	ENO2	protein_coding	ENO2-201	protein_coding	2294	12	11	Low Confidence
ENST00000229277.6	F7/D6	2	1.30149	0.380137	0.658623	ENST00000229277.6 F7/D6	0.0220521	ENSG00000111674.9	ENO2	protein_coding	ENO2-201	protein_coding	2294	12	11	Low Confidence
ENST00000229281.6	F7/D6	3	0.724114	-0.465888	1.10543	ENST00000229281.6 F7/D6	0.000154467	ENSG00000111678.11	C12orf57	protein_coding	C12orf57-201	protein_coding	561	3	2	High Confidence
ENST00000229281.6	M8/D6	3	0.787155	-0.34556	1.39491	ENST00000229281.6 M8/D6	0.0022497	ENSG00000111678.11	C12orf57	protein_coding	C12orf57-201	protein_coding	561	3	2	High Confidence
ENST00000229328.10	D5/D6	2	0.78362	-0.351889	1.26513	ENST00000229328.10 D5/D6	0.0159734	ENSG00000111725.11	PRKAB1	protein_coding	PRKAB1-201	protein_coding	2219	7	6	Low Confidence
ENST00000229335.11	D5/D6	2	0.123914	-3.01268	1.16036	ENST00000229335.11 D5/D6	1.05437e-06	ENSG00000111732.12	AICDA	protein_coding	AICDA-201	protein_coding	2803	5	4	Low Confidence
ENST00000229335.11	M8/D6	2	0.428202	-1.22364	0.147925	ENST00000229335.11 M8/D6	6.7168e-05	ENSG00000111732.12	AICDA	protein_coding	AICDA-201	protein_coding	2803	5	4	Low Confidence
ENST00000229340.10	F7/D6	2	0.836296	-0.257934	0.513196	ENST00000229340.10 F7/D6	0.0850725	ENSG00000111737.12	RAB35	protein_coding	RAB35-201	protein_coding	2855	6	5	Low Confidence
ENST00000229379.3	D5/D6	3	0.81721	-0.295265	5.31124	ENST00000229379.3 D5/D6	0.0962474	ENSG00000111775.3	COX6A1	protein_coding	COX6A1-201	protein_coding	537	3	2	Low Confidence
ENST00000229395.8	D5/D6	3	0.683879	-0.550415	3.9027	ENST00000229395.8 D5/D6	0.0566959	ENSG00000111790.14	FGFR1OP2	protein_coding	FGFR1OP2-201	protein_coding	2932	7	6	Low Confidence
ENST00000229563.6	F7/D6	3	1.34803	0.430563	1.40514	ENST00000229563.6 F7/D6	0.00420181	ENSG00000111843.14	TMEM14C	protein_coding	TMEM14C-201	protein_coding	1016	6	5	High Confidence
ENST00000229595.6	F7/D6	3	0.755066	-0.405431	0.8495	ENST00000229595.6 F7/D6	0.00508689	ENSG00000111875.8	ASF1A	protein_coding	ASF1A-201	protein_coding	2434	4	3	High Confidence
ENST00000229708.4	D5/D6	3	3.12892	1.64553	0.967555	ENST00000229708.4 D5/D6	4.03899e-05	ENSG00000111981.5	ULBP1	protein_coding	ULBP1-201	protein_coding	3211	5	4	High Confidence
ENST00000229758.8	M8/D6	3	2.51207	1.31572	9.80352	ENST00000229758.8 M8/D6	0.00462747	ENSG00000112029.10	FBXO5	protein_coding	FBXO5-201	protein_coding	2054	5	4	Low Confidence
ENST00000229812.8	D5/D6	4	0.721902	-0.47113	2.13847	ENST00000229812.8 D5/D6	0.0126791	ENSG00000112079.9	STK38	protein_coding	STK38-201	protein_coding	3585	14	13	Medium Confidence
ENST00000229812.8	F7/D6	4	0.742536	-0.430052	1.64451	ENST00000229812.8 F7/D6	0.0178253	ENSG00000112079.9	STK38	protein_coding	STK38-201	protein_coding	3585	14	13	High Confidence
ENST00000229829.7	D5/D6	3	0.748028	-0.41898	1.00431	ENST00000229829.7 D5/D6	0.0694361	ENSG00000204252.14	HLA-DOA	protein_coding	HLA-DOA-201	protein_coding	3464	5	4	High Confidence
ENST00000229829.7	F7/D6	3	0.71917	-0.476642	2.69602	ENST00000229829.7 F7/D6	0.0297615	ENSG00000204252.14	HLA-DOA	protein_coding	HLA-DOA-201	protein_coding	3464	5	4	Medium Confidence
ENST00000230050.4	D5/D6	4	1.43555	0.521348	1.0925	ENST00000230050.4 D5/D6	0.000197805	ENSG00000112306.8	RPS12	protein_coding	RPS12-201	protein_coding	503	6	5	High Confidence
ENST00000230050.4	M8/D6	4	0.850874	-0.233326	1.26773	ENST00000230050.4 M8/D6	0.0164953	ENSG00000112306.8	RPS12	protein_coding	RPS12-201	protein_coding	503	6	5	High Confidence
ENST00000230056.8	M8/D6	2	0.789964	-0.340193	0.849499	ENST00000230056.8 M8/D6	0.0870439	ENSG00000112312.10	GMNN	protein_coding	GMNN-201	protein_coding	1263	7	6	Low Confidence
ENST00000230124.8	D5/D6	2	0.714481	-0.485883	3.43197	ENST00000230124.8 D5/D6	0.0700204	ENSG00000112367.12	FIG4	protein_coding	FIG4-201	protein_coding	3025	23	22	Medium Confidence
ENST00000230340.9	D5/D6	4	1.47552	0.560423	1.92292	ENST00000230340.9 D5/D6	0.00953967	ENSG00000112578.10	BYSL	protein_coding	BYSL-201	protein_coding	1718	7	6	Medium Confidence
ENST00000230431.11	D5/D6	3	1.22307	0.290476	0.418254	ENST00000230431.11 D5/D6	0.0463347	ENSG00000112667.13	DNPH1	protein_coding	DNPH1-201	protein_coding	654	4	3	High Confidence
ENST00000230431.11	F7/D6	2	1.08533	0.118089	0.74615	ENST00000230431.11 F7/D6	0.0980764	ENSG00000112667.13	DNPH1	protein_coding	DNPH1-201	protein_coding	654	4	3	Low Confidence
ENST00000230449.9	D5/D6	3	1.24369	0.314592	0.516501	ENST00000230449.9 D5/D6	0.037312	ENSG00000112685.14	EXOC2	protein_coding	EXOC2-201	protein_coding	4456	28	27	High Confidence
ENST00000230461.11	D5/D6	2	0.836659	-0.25729	0.114582	ENST00000230461.11 D5/D6	0.0178547	ENSG00000112697.17	TMEM30A	protein_coding	TMEM30A-201	protein_coding	4418	7	6	Low Confidence
ENST00000230565.3	F7/D6	2	2.51197	1.3288	0.544834	ENST00000230565.3 F7/D6	0.0359543	ENSG00000112796.10	ENPP5	protein_coding	ENPP5-201	protein_coding	2544	4	3	Low Confidence
ENST00000230565.3	M8/D6	2	3.33357	1.73342	7.1033	ENST00000230565.3 M8/D6	0.012152	ENSG00000112796.10	ENPP5	protein_coding	ENPP5-201	protein_coding	2544	4	3	Low Confidence
ENST00000230568.5	D5/D6	4	0.791094	-0.339631	2.62863	ENST00000230568.5 D5/D6	0.00274903	ENSG00000112799.9	LY86	protein_coding	LY86-201	protein_coding	859	5	4	Medium Confidence
ENST00000230568.5	F7/D6	3	0.786367	-0.346778	0.60342	ENST00000230568.5 F7/D6	0.00492557	ENSG00000112799.9	LY86	protein_coding	LY86-201	protein_coding	859	5	4	High Confidence
ENST00000230640.10	D5/D6	3	1.24985	0.321163	2.01537	ENST00000230640.10 D5/D6	0.0262832	ENSG00000039123.16	MTREX	protein_coding	MTREX-201	protein_coding	3961	27	26	Medium Confidence
ENST00000230771.9	D5/D6	2	0.816708	-0.292121	0.44127	ENST00000230771.9 D5/D6	0.0678105	ENSG00000112855.17	HARS2	protein_coding	HARS2-201	protein_coding	2468	13	12	Low Confidence
ENST00000230792.7	M8/D6	3	1.73234	0.792209	1.88631	ENST00000230792.7 M8/D6	0.0225084	ENSG00000112874.10	NUDT12	protein_coding	NUDT12-201	protein_coding	3488	7	6	Medium Confidence
ENST00000230895.11	D5/D6	3	0.745176	-0.4245	1.03048	ENST00000230895.11 D5/D6	0.0102389	ENSG00000112977.16	DAP	protein_coding	DAP-201	protein_coding	2301	4	3	High Confidence
ENST00000230895.11	F7/D6	3	1.22967	0.298039	1.27174	ENST00000230895.11 F7/D6	0.0522051	ENSG00000112977.16	DAP	protein_coding	DAP-201	protein_coding	2301	4	3	High Confidence
ENST00000230914.4	D5/D6	2	1.51764	0.600469	4.34381	ENST00000230914.4 D5/D6	0.0350097	ENSG00000112996.11	MRPS30	protein_coding	MRPS30-201	protein_coding_CDS_not_defined	4331	2	1	Low Confidence
ENST00000230990.7	D5/D6	3	0.334989	-1.58434	6.58546	ENST00000230990.7 D5/D6	0.0110223	ENSG00000113070.8	HBEGF	protein_coding	HBEGF-201	protein_coding	2358	6	5	Low Confidence
ENST00000231061.9	F7/D6	2	0.798096	-0.325367	0.130591	ENST00000231061.9 F7/D6	0.0679108	ENSG00000113140.11	SPARC	protein_coding	SPARC-201	protein_coding	3451	10	9	Low Confidence
ENST00000231512.5	D5/D6	3	0.877901	-0.187881	0.279371	ENST00000231512.5 D5/D6	0.202149	ENSG00000113583.8	C5orf15	protein_coding	C5orf15-201	protein_coding	2188	3	2	High Confidence
ENST00000231512.5	F7/D6	2	0.884612	-0.176885	0.133838	ENST00000231512.5 F7/D6	0.0673278	ENSG00000113583.8	C5orf15	protein_coding	C5orf15-201	protein_coding	2188	3	2	Low Confidence
ENST00000231572.8	D5/D6	4	1.40622	0.491621	0.955878	ENST00000231572.8 D5/D6	0.00106417	ENSG00000113643.9	RARS1	protein_coding	RARS1-201	protein_coding	2122	15	14	High Confidence
ENST00000232219.6	F7/D6	3	3.51671	1.81342	2.3698	ENST00000232219.6 F7/D6	0.000543593	ENSG00000114115.10	RBP1	protein_coding	RBP1-201	protein_coding	898	4	3	Medium Confidence
ENST00000232375.8	D5/D6	3	0.339453	-1.55934	2.07106	ENST00000232375.8 D5/D6	0.00104002	ENSG00000114268.12	PFKFB4	protein_coding	PFKFB4-201	protein_coding	3499	14	13	Medium Confidence
ENST00000232375.8	F7/D6	4	1.6153	0.691721	0.6005	ENST00000232375.8 F7/D6	0.0123204	ENSG00000114268.12	PFKFB4	protein_coding	PFKFB4-201	protein_coding	3499	14	13	High Confidence
ENST00000232375.8	M8/D6	3	1.5254	0.608753	1.73573	ENST00000232375.8 M8/D6	0.0204654	ENSG00000114268.12	PFKFB4	protein_coding	PFKFB4-201	protein_coding	3499	14	13	High Confidence
ENST00000232424.4	F7/D6	2	0.82669	-0.356373	32.7406	ENST00000232424.4 F7/D6	0.0847702	ENSG00000114315.4	HES1	protein_coding	HES1-201	protein_coding	1575	4	3	Low Confidence
ENST00000232458.9	M8/D6	3	1.7275	0.787677	2.62354	ENST00000232458.9 M8/D6	0.0337035	ENSG00000114346.14	ECT2	protein_coding	ECT2-201	protein_coding	4087	24	23	Medium Confidence
ENST00000232496.5	D5/D6	3	0.804953	-0.313078	0.609356	ENST00000232496.5 D5/D6	0.051952	ENSG00000114383.10	TUSC2	protein_coding	TUSC2-201	protein_coding	1669	3	2	High Confidence
ENST00000232564.8	D5/D6	3	1.70646	0.760549	8.415	ENST00000232564.8 D5/D6	0.00504193	ENSG00000114450.11	GNB4	protein_coding	GNB4-201	protein_coding	6315	10	9	Low Confidence
ENST00000232564.8	M8/D6	3	1.57189	0.647061	6.0482	ENST00000232564.8 M8/D6	0.172161	ENSG00000114450.11	GNB4	protein_coding	GNB4-201	protein_coding	6315	10	9	Low Confidence
ENST00000232854.9	F7/D6	2	1.51858	0.602612	1.25435	ENST00000232854.9 F7/D6	0.021427	ENSG00000114735.10	HEMK1	protein_coding	HEMK1-201	protein_coding	16993	11	10	Low Confidence
ENST00000232888.7	D5/D6	4	1.52923	0.612759	0.439011	ENST00000232888.7 D5/D6	0.00426351	ENSG00000114767.7	RRP9	protein_coding	RRP9-201	protein_coding	1542	15	14	High Confidence
ENST00000232905.4	D5/D6	3	0.924234	-0.113704	0.489654	ENST00000232905.4 D5/D6	0.0120208	ENSG00000114784.4	EIF1B	protein_coding	EIF1B-201	protein_coding	987	4	3	High Confidence
ENST00000232905.4	M8/D6	3	1.23866	0.308739	0.548101	ENST00000232905.4 M8/D6	0.00922509	ENSG00000114784.4	EIF1B	protein_coding	EIF1B-201	protein_coding	987	4	3	High Confidence
ENST00000232978.13	M8/D6	2	1.3457	0.427906	2.5117	ENST00000232978.13 M8/D6	0.0241126	ENSG00000114857.19	NKTR	protein_coding	NKTR-201	protein_coding	7265	17	16	Medium Confidence
ENST00000233025.11	D5/D6	3	0.921147	-0.141129	12.9484	ENST00000233025.11 D5/D6	0.000810136	ENSG00000114902.14	SPCS1	protein_coding	SPCS1-201	protein_coding	1082	4	3	Low Confidence
ENST00000233025.11	M8/D6	2	0.803999	-0.314754	0.526416	ENST00000233025.11 M8/D6	0.00359962	ENSG00000114902.14	SPCS1	protein_coding	SPCS1-201	protein_coding	1082	4	3	Low Confidence
ENST00000233055.9	D5/D6	4	0.71991	-0.474731	1.67793	ENST00000233055.9 D5/D6	0.00397091	ENSG00000085449.15	WDFY1	protein_coding	WDFY1-201	protein_coding	4607	12	11	High Confidence
ENST00000233055.9	F7/D6	4	1.32144	0.399924	3.13813	ENST00000233055.9 F7/D6	0.0142497	ENSG00000085449.15	WDFY1	protein_coding	WDFY1-201	protein_coding	4607	12	11	Medium Confidence
ENST00000233055.9	M8/D6	3	0.744284	-0.426084	0.241101	ENST00000233055.9 M8/D6	0.00412897	ENSG00000085449.15	WDFY1	protein_coding	WDFY1-201	protein_coding	4607	12	11	High Confidence
ENST00000233057.9	D5/D6	2	1.17864	0.236639	2.59752	ENST00000233057.9 D5/D6	0.0322842	ENSG00000055332.19	EIF2AK2	protein_coding	EIF2AK2-201	protein_coding	9975	17	16	Medium Confidence
ENST00000233057.9	M8/D6	3	1.24338	0.313596	2.13511	ENST00000233057.9 M8/D6	0.031427	ENSG00000055332.19	EIF2AK2	protein_coding	EIF2AK2-201	protein_coding	9975	17	16	Medium Confidence
ENST00000233114.13	D5/D6	2	1.27546	0.348642	5.73925	ENST00000233114.13 D5/D6	0.0573421	ENSG00000014641.21	MDH1	protein_coding	MDH1-201	protein_coding	1296	9	8	Low Confidence
ENST00000233121.7	F7/D6	2	2.2604	1.17372	6.29151	ENST00000233121.7 F7/D6	0.00747571	ENSG00000084764.12	MAPRE3	protein_coding	MAPRE3-201	protein_coding	1890	7	6	Low Confidence
ENST00000233121.7	M8/D6	2	2.12094	1.08238	5.67215	ENST00000233121.7 M8/D6	0.00581656	ENSG00000084764.12	MAPRE3	protein_coding	MAPRE3-201	protein_coding	1890	7	6	Low Confidence
ENST00000233143.6	F7/D6	3	0.814144	-0.297566	2.54757	ENST00000233143.6 F7/D6	0.00320783	ENSG00000034510.6	TMSB10	protein_coding	TMSB10-201	protein_coding	461	3	2	Medium Confidence
ENST00000233143.6	M8/D6	4	1.24582	0.316924	0.901764	ENST00000233143.6 M8/D6	0.000174218	ENSG00000034510.6	TMSB10	protein_coding	TMSB10-201	protein_coding	461	3	2	High Confidence
ENST00000233146.7	D5/D6	4	1.77138	0.823966	2.01827	ENST00000233146.7 D5/D6	0.000592537	ENSG00000095002.15	MSH2	protein_coding	MSH2-201	protein_coding	3115	16	15	Medium Confidence
ENST00000233379.9	D5/D6	2	0.784034	-0.35106	0.816827	ENST00000233379.9 D5/D6	0.0565028	ENSG00000115042.10	FAHD2A	protein_coding	FAHD2A-201	protein_coding	4775	8	7	Low Confidence
ENST00000233557.7	D5/D6	2	0.89388	-0.161978	1.34325	ENST00000233557.7 D5/D6	0.109974	ENSG00000115216.14	NRBP1	protein_coding	NRBP1-201	protein_coding	2887	19	18	Low Confidence
ENST00000233615.7	D5/D6	3	0.69262	-0.530604	2.26881	ENST00000233615.7 D5/D6	0.0400836	ENSG00000239779.7	WBP1	protein_coding	WBP1-201	protein_coding	1175	4	3	Medium Confidence
ENST00000233615.7	M8/D6	3	0.766114	-0.384462	0.799479	ENST00000233615.7 M8/D6	0.0513818	ENSG00000239779.7	WBP1	protein_coding	WBP1-201	protein_coding	1175	4	3	High Confidence
ENST00000233630.11	D5/D6	3	1.50513	0.589885	0.139574	ENST00000233630.11 D5/D6	0.00176912	ENSG00000115289.14	PCGF1	protein_coding	PCGF1-201	protein_coding	907	9	8	High Confidence
ENST00000233668.10	D5/D6	2	1.26191	0.335604	0.0646834	ENST00000233668.10 D5/D6	0.0390203	ENSG00000115325.14	DOK1	protein_coding	DOK1-201	protein_coding	1918	5	4	Low Confidence
ENST00000233893.10	M8/D6	3	0.780042	-0.35968	3.00947	ENST00000233893.10 M8/D6	0.0106286	ENSG00000115541.11	HSPE1	protein_coding	HSPE1-201	protein_coding	557	4	3	Medium Confidence
ENST00000233957.7	D5/D6	3	3.7894	1.9129	7.86598	ENST00000233957.7 D5/D6	5.96663e-06	ENSG00000115604.12	IL18R1	protein_coding	IL18R1-201	protein_coding	4149	11	10	Low Confidence
ENST00000233957.7	F7/D6	3	2.06207	1.04407	0.416596	ENST00000233957.7 F7/D6	0.000811271	ENSG00000115604.12	IL18R1	protein_coding	IL18R1-201	protein_coding	4149	11	10	High Confidence
ENST00000234040.9	F7/D6	3	0.481214	-1.12068	19.3776	ENST00000234040.9 F7/D6	0.0614571	ENSG00000115687.14	PASK	protein_coding	PASK-201	protein_coding	4540	18	17	Low Confidence
ENST00000234111.9	D5/D6	2	1.49438	0.579541	0.171831	ENST00000234111.9 D5/D6	0.00145675	ENSG00000115758.14	ODC1	protein_coding	ODC1-201	protein_coding	2476	12	11	Low Confidence
ENST00000234111.9	F7/D6	2	0.864197	-0.210727	1.483	ENST00000234111.9 F7/D6	0.0949605	ENSG00000115758.14	ODC1	protein_coding	ODC1-201	protein_coding	2476	12	11	Low Confidence
ENST00000234160.5	D5/D6	2	1.10093	0.138722	0.118665	ENST00000234160.5 D5/D6	0.0867245	ENSG00000115806.13	GORASP2	protein_coding	GORASP2-201	protein_coding	2447	10	9	Low Confidence
ENST00000234170.10	D5/D6	3	1.20191	0.26531	0.327558	ENST00000234170.10 D5/D6	0.032267	ENSG00000115816.15	CEBPZ	protein_coding	CEBPZ-201	protein_coding	3346	16	15	High Confidence
ENST00000234179.8	D5/D6	2	0.765023	-0.389411	6.42664	ENST00000234179.8 D5/D6	0.0606467	ENSG00000115825.11	PRKD3	protein_coding	PRKD3-201	protein_coding	6156	19	18	Low Confidence
ENST00000234179.8	F7/D6	2	0.605727	-0.724093	3.39677	ENST00000234179.8 F7/D6	0.00298498	ENSG00000115825.11	PRKD3	protein_coding	PRKD3-201	protein_coding	6156	19	18	Medium Confidence
ENST00000234179.8	M8/D6	2	1.65489	0.726425	2.07224	ENST00000234179.8 M8/D6	0.000662331	ENSG00000115825.11	PRKD3	protein_coding	PRKD3-201	protein_coding	6156	19	18	Medium Confidence
ENST00000234256.4	D5/D6	2	0.812835	-0.30324	7.68721	ENST00000234256.4 D5/D6	0.129577	ENSG00000115902.11	SLC1A4	protein_coding	SLC1A4-201	protein_coding	4563	8	7	Low Confidence
ENST00000234256.4	F7/D6	3	0.766269	-0.385714	3.4048	ENST00000234256.4 F7/D6	0.0644101	ENSG00000115902.11	SLC1A4	protein_coding	SLC1A4-201	protein_coding	4563	8	7	Medium Confidence
ENST00000234256.4	M8/D6	2	0.796188	-0.33514	9.33994	ENST00000234256.4 M8/D6	0.0653293	ENSG00000115902.11	SLC1A4	protein_coding	SLC1A4-201	protein_coding	4563	8	7	Low Confidence
ENST00000234301.3	F7/D6	2	1.19967	0.262626	0.406051	ENST00000234301.3 F7/D6	0.00905307	ENSG00000115944.15	COX7A2L	protein_coding	COX7A2L-201	protein_coding	2282	3	2	Low Confidence
ENST00000234301.3	M8/D6	2	0.88791	-0.171521	0.317712	ENST00000234301.3 M8/D6	0.0350813	ENSG00000115944.15	COX7A2L	protein_coding	COX7A2L-201	protein_coding	2282	3	2	Low Confidence
ENST00000234313.8	D5/D6	3	0.904267	-0.145196	0.33757	ENST00000234313.8 D5/D6	0.0429287	ENSG00000115956.10	PLEK	protein_coding	PLEK-201	protein_coding	2760	9	8	High Confidence
ENST00000234420.11	D5/D6	3	1.44126	0.526185	2.79634	ENST00000234420.11 D5/D6	0.023396	ENSG00000116062.19	MSH6	protein_coding	MSH6-201	protein_coding	4265	10	9	Medium Confidence
ENST00000234454.6	F7/D6	2	1.35075	0.433723	0.708466	ENST00000234454.6 F7/D6	0.0827063	ENSG00000116096.6	SPR	protein_coding	SPR-201	protein_coding	1432	3	2	Low Confidence
ENST00000234626.11	D5/D6	2	1.18807	0.247856	3.25769	ENST00000234626.11 D5/D6	0.0582212	ENSG00000097046.13	CDC7	protein_coding	CDC7-201	protein_coding	3215	12	11	Medium Confidence
ENST00000234626.11	F7/D6	2	1.51277	0.597139	0.834136	ENST00000234626.11 F7/D6	0.0737395	ENSG00000097046.13	CDC7	protein_coding	CDC7-201	protein_coding	3215	12	11	Low Confidence
ENST00000234677.7	F7/D6	2	0.878989	-0.186084	0.049082	ENST00000234677.7 F7/D6	0.0428857	ENSG00000031698.13	SARS1	protein_coding	SARS1-201	protein_coding	1914	11	10	Low Confidence
ENST00000234677.7	M8/D6	2	0.888814	-0.170046	0.00691955	ENST00000234677.7 M8/D6	0.0185577	ENSG00000031698.13	SARS1	protein_coding	SARS1-201	protein_coding	1914	11	10	Low Confidence
ENST00000234831.10	D5/D6	3	0.852172	-0.230842	0.631545	ENST00000234831.10 D5/D6	0.00181967	ENSG00000116209.12	TMEM59	protein_coding	TMEM59-201	protein_coding	6457	8	7	High Confidence
ENST00000234831.10	F7/D6	3	0.817601	-0.291314	2.31042	ENST00000234831.10 F7/D6	0.0116407	ENSG00000116209.12	TMEM59	protein_coding	TMEM59-201	protein_coding	6457	8	7	Medium Confidence
ENST00000234831.10	M8/D6	3	0.877276	-0.190963	3.8281	ENST00000234831.10 M8/D6	0.00851271	ENSG00000116209.12	TMEM59	protein_coding	TMEM59-201	protein_coding	6457	8	7	Low Confidence
ENST00000234875.9	D5/D6	3	1.18036	0.239183	0.548801	ENST00000234875.9 D5/D6	0.00131345	ENSG00000116251.11	RPL22	protein_coding	RPL22-201	protein_coding	2061	4	3	High Confidence
ENST00000234875.9	F7/D6	3	1.16463	0.219803	0.708187	ENST00000234875.9 F7/D6	0.00710662	ENSG00000116251.11	RPL22	protein_coding	RPL22-201	protein_coding	2061	4	3	High Confidence
ENST00000235090.10	D5/D6	2	1.19848	0.261049	1.49494	ENST00000235090.10 D5/D6	0.0605109	ENSG00000116455.14	WDR77	protein_coding	WDR77-201	protein_coding	2456	10	9	Low Confidence
ENST00000235332.6	M8/D6	3	0.80432	-0.314165	0.208256	ENST00000235332.6 M8/D6	0.043143	ENSG00000116691.11	MIIP	protein_coding	MIIP-201	protein_coding	1541	10	9	High Confidence
ENST00000235345.6	M8/D6	2	0.742036	-0.430832	2.33744	ENST00000235345.6 M8/D6	0.0529742	ENSG00000116704.8	SLC35D1	protein_coding	SLC35D1-201	protein_coding	6193	12	11	Medium Confidence
ENST00000235382.7	D5/D6	4	0.382645	-1.38916	3.95729	ENST00000235382.7 D5/D6	4.25852e-05	ENSG00000116741.8	RGS2	protein_coding	RGS2-201	protein_coding	1348	5	4	Low Confidence
ENST00000235382.7	F7/D6	3	0.538235	-0.893709	0.337671	ENST00000235382.7 F7/D6	0.000290207	ENSG00000116741.8	RGS2	protein_coding	RGS2-201	protein_coding	1348	5	4	High Confidence
ENST00000235382.7	M8/D6	3	0.730518	-0.453255	1.3065	ENST00000235382.7 M8/D6	0.0400611	ENSG00000116741.8	RGS2	protein_coding	RGS2-201	protein_coding	1348	5	4	High Confidence
ENST00000235532.9	D5/D6	3	0.647313	-0.630175	4.3337	ENST00000235532.9 D5/D6	0.141146	ENSG00000116885.18	OSCP1	protein_coding	OSCP1-201	protein_coding	1455	10	9	Low Confidence
ENST00000235628.2	D5/D6	2	0.606098	-0.722514	1.38333	ENST00000235628.2 D5/D6	0.0417561	ENSG00000116981.4	NT5C1A	protein_coding	NT5C1A-201	protein_coding	9068	6	5	Low Confidence
ENST00000236051.3	D5/D6	3	1.2579	0.330797	1.22787	ENST00000236051.3 D5/D6	0.0182429	ENSG00000117395.13	EBNA1BP2	protein_coding	EBNA1BP2-201	protein_coding	1352	9	8	High Confidence
ENST00000236051.3	F7/D6	3	1.13888	0.187581	0.47781	ENST00000236051.3 F7/D6	0.33611	ENSG00000117395.13	EBNA1BP2	protein_coding	EBNA1BP2-201	protein_coding	1352	9	8	High Confidence
ENST00000236067.8	M8/D6	3	1.64472	0.717803	0.504531	ENST00000236067.8 M8/D6	0.0106879	ENSG00000117410.14	ATP6V0B	protein_coding	ATP6V0B-201	protein_coding	944	7	6	High Confidence
ENST00000236192.12	F7/D6	2	0.869572	-0.203173	4.63278	ENST00000236192.12 F7/D6	0.0715665	ENSG00000117533.15	VAMP4	protein_coding	VAMP4-201	protein_coding	4977	8	7	Low Confidence
ENST00000236937.13	D5/D6	2	0.79786	-0.326145	2.21071	ENST00000236937.13 D5/D6	0.204638	ENSG00000072694.22	FCGR2B	protein_coding	FCGR2B-201	protein_coding	1440	7	6	Medium Confidence
ENST00000236937.13	M8/D6	3	0.501161	-0.996764	0.870857	ENST00000236937.13 M8/D6	0.00723428	ENSG00000072694.22	FCGR2B	protein_coding	FCGR2B-201	protein_coding	1440	7	6	High Confidence
ENST00000236938.12	D5/D6	3	0.64546	-0.63587	5.47757	ENST00000236938.12 D5/D6	0.000614969	ENSG00000132185.18	FCRLA	protein_coding	FCRLA-201	protein_coding	2088	5	4	Low Confidence
ENST00000236959.14	D5/D6	4	1.34171	0.42372	1.25865	ENST00000236959.14 D5/D6	0.00207871	ENSG00000138363.15	ATIC	protein_coding	ATIC-201	protein_coding	1972	16	15	High Confidence
ENST00000236959.14	M8/D6	4	0.847071	-0.239804	1.27821	ENST00000236959.14 M8/D6	0.0149882	ENSG00000138363.15	ATIC	protein_coding	ATIC-201	protein_coding	1972	16	15	High Confidence
ENST00000236980.10	M8/D6	3	0.779999	-0.359192	2.243	ENST00000236980.10 M8/D6	0.0210112	ENSG00000118246.14	FASTKD2	protein_coding	FASTKD2-201	protein_coding	3188	12	11	Medium Confidence
ENST00000237283.9	D5/D6	2	1.68003	0.748354	1.35108	ENST00000237283.9 D5/D6	0.009269	ENSG00000189007.16	ADAT2	protein_coding	ADAT2-201	protein_coding	6244	6	5	Low Confidence
ENST00000237305.11	D5/D6	3	0.296364	-1.75457	0.316814	ENST00000237305.11 D5/D6	2.38948e-06	ENSG00000118515.12	SGK1	protein_coding	SGK1-201	protein_coding	2401	12	11	High Confidence
ENST00000237305.11	F7/D6	3	0.583497	-0.777238	0.495707	ENST00000237305.11 F7/D6	0.000639669	ENSG00000118515.12	SGK1	protein_coding	SGK1-201	protein_coding	2401	12	11	High Confidence
ENST00000237305.11	M8/D6	3	0.168069	-2.57621	4.75016	ENST00000237305.11 M8/D6	8.49255e-08	ENSG00000118515.12	SGK1	protein_coding	SGK1-201	protein_coding	2401	12	11	Low Confidence
ENST00000237455.5	D5/D6	3	0.595087	-0.752973	5.36321	ENST00000237455.5 D5/D6	0.0110437	ENSG00000239305.7	RNF103	protein_coding	RNF103-201	protein_coding	3482	4	3	Low Confidence
ENST00000237500.10	D5/D6	2	0.988348	-0.0169974	1.10631	ENST00000237500.10 D5/D6	0.0270325	ENSG00000118680.14	MYL12B	protein_coding	MYL12B-201	protein_coding	1163	4	3	Low Confidence
ENST00000237500.10	M8/D6	2	0.86227	-0.21401	1.75405	ENST00000237500.10 M8/D6	0.0199599	ENSG00000118680.14	MYL12B	protein_coding	MYL12B-201	protein_coding	1163	4	3	Low Confidence
ENST00000237530.11	D5/D6	4	0.858822	-0.219587	0.288146	ENST00000237530.11 D5/D6	0.0241358	ENSG00000118705.18	RPN2	protein_coding	RPN2-201	protein_coding	2227	17	16	High Confidence
ENST00000237530.11	M8/D6	4	0.688417	-0.538658	0.233882	ENST00000237530.11 M8/D6	0.000219218	ENSG00000118705.18	RPN2	protein_coding	RPN2-201	protein_coding	2227	17	16	High Confidence
ENST00000237654.9	D5/D6	2	1.08733	0.120755	0.669217	ENST00000237654.9 D5/D6	0.0458345	ENSG00000118816.11	CCNI	protein_coding	CCNI-201	protein_coding	2759	7	6	Low Confidence
ENST00000237654.9	M8/D6	3	1.22691	0.294934	0.811908	ENST00000237654.9 M8/D6	0.0217697	ENSG00000118816.11	CCNI	protein_coding	CCNI-201	protein_coding	2759	7	6	High Confidence
ENST00000237853.9	D5/D6	4	0.408594	-1.29376	3.46627	ENST00000237853.9 D5/D6	5.64648e-06	ENSG00000118985.16	ELL2	protein_coding	ELL2-201	protein_coding	5826	12	11	Medium Confidence
ENST00000237853.9	F7/D6	4	0.840417	-0.252266	2.59817	ENST00000237853.9 F7/D6	0.0327261	ENSG00000118985.16	ELL2	protein_coding	ELL2-201	protein_coding	5826	12	11	Medium Confidence
ENST00000237853.9	M8/D6	3	0.537363	-0.898258	3.96679	ENST00000237853.9 M8/D6	4.89272e-05	ENSG00000118985.16	ELL2	protein_coding	ELL2-201	protein_coding	5826	12	11	Low Confidence
ENST00000237858.11	D5/D6	3	0.791949	-0.336788	1.35352	ENST00000237858.11 D5/D6	0.00104737	ENSG00000173221.14	GLRX	protein_coding	GLRX-201	protein_coding	932	3	2	High Confidence
ENST00000237889.9	D5/D6	3	0.930213	-0.104544	1.11132	ENST00000237889.9 D5/D6	0.149524	ENSG00000119013.10	NDUFB3	protein_coding	NDUFB3-201	protein_coding	493	3	2	High Confidence
ENST00000238112.8	D5/D6	2	1.13258	0.179605	0.279097	ENST00000238112.8 D5/D6	0.176529	ENSG00000119203.14	CPSF3	protein_coding	CPSF3-201	protein_coding	2259	18	17	Low Confidence
ENST00000238146.9	D5/D6	3	1.27196	0.345325	3.43684	ENST00000238146.9 D5/D6	0.0727269	ENSG00000111364.16	DDX55	protein_coding	DDX55-201	protein_coding	2656	14	13	Medium Confidence
ENST00000238477.5	D5/D6	3	0.676432	-0.565145	2.84012	ENST00000238477.5 D5/D6	0.0400605	ENSG00000119523.10	ALG2	protein_coding	ALG2-201	nonsense_mediated_decay	2966	3	2	Medium Confidence
ENST00000238477.5	M8/D6	3	0.634759	-0.656152	1.73324	ENST00000238477.5 M8/D6	0.0172292	ENSG00000119523.10	ALG2	protein_coding	ALG2-201	nonsense_mediated_decay	2966	3	2	High Confidence
ENST00000238508.8	D5/D6	3	1.20665	0.271	0.257841	ENST00000238508.8 D5/D6	0.0433521	ENSG00000242550.7	SERPINB10	protein_coding	SERPINB10-201	protein_coding	2155	8	7	High Confidence
ENST00000238508.8	F7/D6	4	4.62611	2.20958	1.01253	ENST00000238508.8 F7/D6	1.07375e-07	ENSG00000242550.7	SERPINB10	protein_coding	SERPINB10-201	protein_coding	2155	8	7	High Confidence
ENST00000238508.8	M8/D6	4	2.53801	1.3435	0.960321	ENST00000238508.8 M8/D6	3.64091e-05	ENSG00000242550.7	SERPINB10	protein_coding	SERPINB10-201	protein_coding	2155	8	7	High Confidence
ENST00000238609.4	D5/D6	3	0.707309	-0.500118	1.92981	ENST00000238609.4 D5/D6	0.00173321	ENSG00000119632.4	IFI27L2	protein_coding	IFI27L2-201	protein_coding	451	4	3	Medium Confidence
ENST00000238647.5	D5/D6	3	0.90759	-0.140047	1.05187	ENST00000238647.5 D5/D6	0.492816	ENSG00000119669.5	IRF2BPL	protein_coding	IRF2BPL-201	protein_coding	4166	1	0	High Confidence
ENST00000238647.5	F7/D6	2	0.911976	-0.132938	0.269849	ENST00000238647.5 F7/D6	0.190143	ENSG00000119669.5	IRF2BPL	protein_coding	IRF2BPL-201	protein_coding	4166	1	0	Low Confidence
ENST00000238647.5	M8/D6	2	1.31532	0.395412	0.113279	ENST00000238647.5 M8/D6	0.0785638	ENSG00000119669.5	IRF2BPL	protein_coding	IRF2BPL-201	protein_coding	4166	1	0	Low Confidence
ENST00000238667.9	F7/D6	4	1.61971	0.694691	2.21271	ENST00000238667.9 F7/D6	0.0108078	ENSG00000119686.10	FLVCR2	protein_coding	FLVCR2-201	protein_coding	3629	10	9	Medium Confidence
ENST00000238721.9	D5/D6	2	0.686532	-0.544919	5.66444	ENST00000238721.9 D5/D6	0.109789	ENSG00000115129.14	TP53I3	protein_coding	TP53I3-201	protein_coding	1653	5	4	Low Confidence
ENST00000238721.9	M8/D6	3	0.538341	-0.894764	3.04681	ENST00000238721.9 M8/D6	0.0314232	ENSG00000115129.14	TP53I3	protein_coding	TP53I3-201	protein_coding	1653	5	4	Medium Confidence
ENST00000238738.9	M8/D6	2	0.814055	-0.303635	9.70957	ENST00000238738.9 M8/D6	0.216007	ENSG00000119729.12	RHOQ	protein_coding	RHOQ-201	protein_coding	4780	5	4	Low Confidence
ENST00000238788.14	M8/D6	2	0.823253	-0.280594	0.186129	ENST00000238788.14 M8/D6	0.116137	ENSG00000119777.20	TMEM214	protein_coding	TMEM214-201	protein_coding	2978	17	16	Low Confidence
ENST00000238823.13	D5/D6	2	1.14106	0.190231	1.41616	ENST00000238823.13 D5/D6	0.158686	ENSG00000119812.20	FAM98A	protein_coding	FAM98A-201	protein_coding	2751	8	7	Low Confidence
ENST00000238856.8	F7/D6	2	0.834151	-0.262038	2.40759	ENST00000238856.8 F7/D6	0.0569883	ENSG00000119844.17	AFTPH	protein_coding	AFTPH-201	protein_coding	4040	9	8	Medium Confidence
ENST00000238875.10	M8/D6	2	0.456815	-1.13039	0.991677	ENST00000238875.10 M8/D6	0.046708	ENSG00000119862.13	LGALSL	protein_coding	LGALSL-201	protein_coding	3856	5	4	Low Confidence
ENST00000239165.9	D5/D6	3	1.37313	0.457154	1.4755	ENST00000239165.9 D5/D6	0.013234	ENSG00000260027.5	HOXB7	protein_coding	HOXB7-201	protein_coding	1363	2	1	High Confidence
ENST00000239165.9	M8/D6	3	1.56992	0.650288	1.6778	ENST00000239165.9 M8/D6	0.0025863	ENSG00000260027.5	HOXB7	protein_coding	HOXB7-201	protein_coding	1363	2	1	High Confidence
ENST00000239223.4	D5/D6	3	0.65423	-0.612486	1.56726	ENST00000239223.4 D5/D6	0.00429249	ENSG00000120129.6	DUSP1	protein_coding	DUSP1-201	protein_coding	2013	4	3	High Confidence
ENST00000239223.4	M8/D6	3	0.685157	-0.545753	1.33695	ENST00000239223.4 M8/D6	0.0351388	ENSG00000120129.6	DUSP1	protein_coding	DUSP1-201	protein_coding	2013	4	3	High Confidence
ENST00000239231.7	D5/D6	3	1.24529	0.316408	0.724423	ENST00000239231.7 D5/D6	0.0484954	ENSG00000120137.7	PANK3	protein_coding	PANK3-201	protein_coding	10274	7	6	High Confidence
ENST00000239666.9	D5/D6	3	0.933665	-0.0990984	0.727908	ENST00000239666.9 D5/D6	0.0264735	ENSG00000120509.12	PDZD11	protein_coding	PDZD11-201	protein_coding	991	7	6	High Confidence
ENST00000239878.9	D5/D6	2	0.934534	-0.097689	0.326285	ENST00000239878.9 D5/D6	0.215285	ENSG00000120686.12	UFM1	protein_coding	UFM1-201	protein_coding	3168	6	5	Low Confidence
ENST00000239878.9	M8/D6	2	0.859292	-0.218789	0.353749	ENST00000239878.9 M8/D6	0.0263445	ENSG00000120686.12	UFM1	protein_coding	UFM1-201	protein_coding	3168	6	5	Low Confidence
ENST00000239882.7	D5/D6	2	1.32383	0.404708	0.275216	ENST00000239882.7 D5/D6	0.0154475	ENSG00000120690.16	ELF1	protein_coding	ELF1-201	protein_coding	3678	9	8	Low Confidence
ENST00000239882.7	F7/D6	2	0.85114	-0.232539	0.308617	ENST00000239882.7 F7/D6	0.0321233	ENSG00000120690.16	ELF1	protein_coding	ELF1-201	protein_coding	3678	9	8	Low Confidence
ENST00000239882.7	M8/D6	3	1.25655	0.325504	5.32646	ENST00000239882.7 M8/D6	0.0657813	ENSG00000120690.16	ELF1	protein_coding	ELF1-201	protein_coding	3678	9	8	Low Confidence
ENST00000239891.4	M8/D6	3	0.755045	-0.405923	1.97844	ENST00000239891.4 M8/D6	0.00753954	ENSG00000120697.10	ALG5	protein_coding	ALG5-201	protein_coding	1219	10	9	Medium Confidence
ENST00000239938.5	D5/D6	3	1.67032	0.739822	1.44126	ENST00000239938.5 D5/D6	0.00475292	ENSG00000120738.8	EGR1	protein_coding	EGR1-201	protein_coding	3137	2	1	High Confidence
ENST00000239938.5	M8/D6	3	1.44153	0.526602	2.60708	ENST00000239938.5 M8/D6	0.011556	ENSG00000120738.8	EGR1	protein_coding	EGR1-201	protein_coding	3137	2	1	Medium Confidence
ENST00000239940.12	D5/D6	3	1.42886	0.514456	1.68979	ENST00000239940.12 D5/D6	0.0759893	ENSG00000070087.15	PFN2	protein_coding	PFN2-201	protein_coding	2047	3	2	High Confidence
ENST00000239940.12	M8/D6	3	0.548429	-0.872259	6.1169	ENST00000239940.12 M8/D6	0.00932642	ENSG00000070087.15	PFN2	protein_coding	PFN2-201	protein_coding	2047	3	2	Low Confidence
ENST00000240055.8	M8/D6	3	1.30966	0.387977	2.93292	ENST00000240055.8 M8/D6	0.0346248	ENSG00000120837.8	NFYB	protein_coding	NFYB-201	protein_coding	3424	8	7	Medium Confidence
ENST00000240100.7	D5/D6	3	0.882845	-0.182509	4.41544	ENST00000240100.7 D5/D6	0.0170206	ENSG00000120875.9	DUSP4	protein_coding	DUSP4-201	protein_coding	5553	4	3	Low Confidence
ENST00000240100.7	F7/D6	4	0.499857	-1.00047	0.507793	ENST00000240100.7 F7/D6	2.85789e-05	ENSG00000120875.9	DUSP4	protein_coding	DUSP4-201	protein_coding	5553	4	3	High Confidence
ENST00000240100.7	M8/D6	3	1.25994	0.333017	1.52961	ENST00000240100.7 M8/D6	0.0082196	ENSG00000120875.9	DUSP4	protein_coding	DUSP4-201	protein_coding	5553	4	3	High Confidence
ENST00000240139.10	D5/D6	3	0.898322	-0.154787	0.794294	ENST00000240139.10 D5/D6	0.0486623	ENSG00000120910.15	PPP3CC	protein_coding	PPP3CC-201	protein_coding	2194	14	13	High Confidence
ENST00000240304.5	D5/D6	4	1.26772	0.341002	2.38205	ENST00000240304.5 D5/D6	0.0316639	ENSG00000108848.16	LUC7L3	protein_coding	LUC7L3-201	protein_coding	1972	11	10	Medium Confidence
ENST00000240304.5	F7/D6	3	0.788736	-0.34314	2.28357	ENST00000240304.5 F7/D6	0.0452373	ENSG00000108848.16	LUC7L3	protein_coding	LUC7L3-201	protein_coding	1972	11	10	Medium Confidence
ENST00000240364.7	D5/D6	3	0.666957	-0.600632	10.2154	ENST00000240364.7 D5/D6	0.0538698	ENSG00000121104.8	FAM117A	protein_coding	FAM117A-201	protein_coding	2329	8	7	Low Confidence
ENST00000240423.9	M8/D6	2	2.0872	1.06106	2.65989	ENST00000240423.9 M8/D6	0.00228178	ENSG00000121152.10	NCAPH	protein_coding	NCAPH-201	protein_coding	6030	18	17	Medium Confidence
ENST00000240488.8	M8/D6	3	2.1663	1.10514	8.55979	ENST00000240488.8 M8/D6	0.00284002	ENSG00000121211.8	MND1	protein_coding	MND1-201	protein_coding	929	8	7	Low Confidence
ENST00000240499.8	D5/D6	2	1.30428	0.383216	0.75691	ENST00000240499.8 D5/D6	0.0139585	ENSG00000131127.14	ZNF141	protein_coding	ZNF141-201	protein_coding	12601	4	3	Low Confidence
ENST00000240651.14	F7/D6	3	0.809634	-0.30476	0.837068	ENST00000240651.14 F7/D6	0.0502845	ENSG00000121350.16	PYROXD1	protein_coding	PYROXD1-201	protein_coding	4075	12	11	High Confidence
ENST00000240851.9	F7/D6	2	1.26105	0.334574	0.829268	ENST00000240851.9 F7/D6	0.0106952	ENSG00000114354.15	TFG	protein_coding	TFG-201	protein_coding	1907	8	7	Low Confidence
ENST00000240922.8	F7/D6	3	0.783981	-0.355305	5.2935	ENST00000240922.8 F7/D6	0.0732098	ENSG00000121579.14	NAA50	protein_coding	NAA50-201	protein_coding	6112	5	4	Low Confidence
ENST00000241051.8	D5/D6	3	0.214932	-2.21846	1.68544	ENST00000241051.8 D5/D6	0.000433835	ENSG00000121690.11	DEPDC7	protein_coding	DEPDC7-201	protein_coding	1741	9	8	High Confidence
ENST00000241051.8	F7/D6	4	0.453257	-1.14276	2.28081	ENST00000241051.8 F7/D6	0.0193945	ENSG00000121690.11	DEPDC7	protein_coding	DEPDC7-201	protein_coding	1741	9	8	Medium Confidence
ENST00000241051.8	M8/D6	3	1.49477	0.579484	1.73846	ENST00000241051.8 M8/D6	0.060996	ENSG00000121690.11	DEPDC7	protein_coding	DEPDC7-201	protein_coding	1741	9	8	High Confidence
ENST00000241052.5	D5/D6	3	0.787781	-0.344184	0.593364	ENST00000241052.5 D5/D6	0.0309709	ENSG00000121691.7	CAT	protein_coding	CAT-201	protein_coding	2291	13	12	High Confidence
ENST00000241261.7	D5/D6	3	0.265251	-1.91493	1.57372	ENST00000241261.7 D5/D6	3.70515e-06	ENSG00000121858.11	TNFSF10	protein_coding	TNFSF10-201	protein_coding	1876	5	4	High Confidence
ENST00000241261.7	F7/D6	3	0.51286	-0.963748	1.64023	ENST00000241261.7 F7/D6	0.00012034	ENSG00000121858.11	TNFSF10	protein_coding	TNFSF10-201	protein_coding	1876	5	4	High Confidence
ENST00000241261.7	M8/D6	4	0.648066	-0.626272	1.49089	ENST00000241261.7 M8/D6	0.00229987	ENSG00000121858.11	TNFSF10	protein_coding	TNFSF10-201	protein_coding	1876	5	4	High Confidence
ENST00000241337.9	D5/D6	3	1.62655	0.701732	0.742944	ENST00000241337.9 D5/D6	0.00318045	ENSG00000213366.13	GSTM2	protein_coding	GSTM2-201	protein_coding	1166	8	7	High Confidence
ENST00000241337.9	F7/D6	3	1.61468	0.691002	1.31035	ENST00000241337.9 F7/D6	0.00851562	ENSG00000213366.13	GSTM2	protein_coding	GSTM2-201	protein_coding	1166	8	7	High Confidence
ENST00000241337.9	M8/D6	2	0.650941	-0.621177	4.9589	ENST00000241337.9 M8/D6	0.049378	ENSG00000213366.13	GSTM2	protein_coding	GSTM2-201	protein_coding	1166	8	7	Low Confidence
ENST00000241393.4	D5/D6	4	0.598261	-0.742028	2.02719	ENST00000241393.4 D5/D6	0.0107502	ENSG00000121966.8	CXCR4	protein_coding	CXCR4-201	protein_coding	1668	2	1	Medium Confidence
ENST00000241393.4	F7/D6	4	0.301439	-1.73067	1.68317	ENST00000241393.4 F7/D6	8.06988e-06	ENSG00000121966.8	CXCR4	protein_coding	CXCR4-201	protein_coding	1668	2	1	High Confidence
ENST00000241393.4	M8/D6	4	0.338765	-1.56195	1.18546	ENST00000241393.4 M8/D6	4.77353e-05	ENSG00000121966.8	CXCR4	protein_coding	CXCR4-201	protein_coding	1668	2	1	High Confidence
ENST00000241436.9	M8/D6	2	1.2997	0.377978	1.69028	ENST00000241436.9 M8/D6	0.0198551	ENSG00000122008.16	POLK	protein_coding	POLK-201	protein_coding	14623	15	14	Low Confidence
ENST00000241600.10	D5/D6	2	1.35289	0.432467	7.03625	ENST00000241600.10 D5/D6	0.0193801	ENSG00000122140.13	MRPS2	protein_coding	MRPS2-201	protein_coding	1458	4	3	Low Confidence
ENST00000242057.9	D5/D6	2	0.360181	-1.47408	3.4866	ENST00000242057.9 D5/D6	9.62475e-05	ENSG00000106546.14	AHR	protein_coding	AHR-201	protein_coding	6243	11	10	Medium Confidence
ENST00000242059.10	D5/D6	4	1.30504	0.379397	4.51508	ENST00000242059.10 D5/D6	0.0159765	ENSG00000136193.17	SCRN1	protein_coding	SCRN1-201	protein_coding	5254	8	7	Low Confidence
ENST00000242059.10	F7/D6	4	1.37425	0.457231	2.56707	ENST00000242059.10 F7/D6	0.015308	ENSG00000136193.17	SCRN1	protein_coding	SCRN1-201	protein_coding	5254	8	7	Medium Confidence
ENST00000242059.10	M8/D6	2	1.19142	0.25265	0.721567	ENST00000242059.10 M8/D6	0.0404151	ENSG00000136193.17	SCRN1	protein_coding	SCRN1-201	protein_coding	5254	8	7	Low Confidence
ENST00000242108.9	M8/D6	3	2.33161	1.21448	7.00201	ENST00000242108.9 M8/D6	0.015973	ENSG00000122547.11	EEPD1	protein_coding	EEPD1-201	protein_coding	4655	8	7	Low Confidence
ENST00000242257.14	D5/D6	2	0.832564	-0.264388	0.535094	ENST00000242257.14 D5/D6	0.0250936	ENSG00000122687.19	MRM2	protein_coding	MRM2-201	protein_coding	1704	3	2	Low Confidence
ENST00000242257.14	M8/D6	2	0.853405	-0.228715	0.488859	ENST00000242257.14 M8/D6	0.0412063	ENSG00000122687.19	MRM2	protein_coding	MRM2-201	protein_coding	1704	3	2	Low Confidence
ENST00000242351.10	D5/D6	3	0.897744	-0.155889	1.35558	ENST00000242351.10 D5/D6	0.100162	ENSG00000105939.14	ZC3HAV1	protein_coding	ZC3HAV1-201	protein_coding	7177	13	12	High Confidence
ENST00000242351.10	F7/D6	3	0.844259	-0.244532	1.41218	ENST00000242351.10 F7/D6	0.0985154	ENSG00000105939.14	ZC3HAV1	protein_coding	ZC3HAV1-201	protein_coding	7177	13	12	High Confidence
ENST00000242351.10	M8/D6	2	0.832189	-0.265241	1.76722	ENST00000242351.10 M8/D6	0.0603654	ENSG00000105939.14	ZC3HAV1	protein_coding	ZC3HAV1-201	protein_coding	7177	13	12	Low Confidence
ENST00000242465.4	D5/D6	3	0.950709	-0.0729272	0.152779	ENST00000242465.4 D5/D6	0.0184766	ENSG00000122862.5	SRGN	protein_coding	SRGN-201	protein_coding	1217	3	2	High Confidence
ENST00000242465.4	M8/D6	4	0.874838	-0.193029	0.736615	ENST00000242465.4 M8/D6	0.0230884	ENSG00000122862.5	SRGN	protein_coding	SRGN-201	protein_coding	1217	3	2	High Confidence
ENST00000242480.4	M8/D6	3	1.51013	0.582225	9.53816	ENST00000242480.4 M8/D6	0.0322724	ENSG00000122877.18	EGR2	protein_coding	EGR2-201	protein_coding	2979	2	1	Low Confidence
ENST00000242576.7	M8/D6	3	0.633865	-0.663291	6.09088	ENST00000242576.7 M8/D6	0.0114567	ENSG00000076248.12	UNG	protein_coding	UNG-201	protein_coding	2048	7	6	Low Confidence
ENST00000242577.11	D5/D6	3	0.9513	-0.0722695	1.29809	ENST00000242577.11 D5/D6	0.0137867	ENSG00000088986.11	DYNLL1	protein_coding	DYNLL1-201	protein_coding	663	3	2	High Confidence
ENST00000242577.11	F7/D6	3	0.782171	-0.354605	1.05169	ENST00000242577.11 F7/D6	0.00475717	ENSG00000088986.11	DYNLL1	protein_coding	DYNLL1-201	protein_coding	663	3	2	High Confidence
ENST00000242577.11	M8/D6	2	0.850484	-0.233732	1.10621	ENST00000242577.11 M8/D6	0.0599665	ENSG00000088986.11	DYNLL1	protein_coding	DYNLL1-201	protein_coding	663	3	2	Low Confidence
ENST00000242591.10	M8/D6	2	1.64824	0.720915	0.356747	ENST00000242591.10 M8/D6	0.0883102	ENSG00000122970.16	IFT81	protein_coding	IFT81-201	protein_coding	3124	19	18	Low Confidence
ENST00000242607.13	F7/D6	2	0.905468	-0.143271	0.287364	ENST00000242607.13 F7/D6	0.215318	ENSG00000122986.14	HVCN1	protein_coding	HVCN1-201	protein_coding	1685	8	7	Low Confidence
ENST00000242728.5	D5/D6	2	0.416911	-1.26908	9.74751	ENST00000242728.5 D5/D6	0.0231619	ENSG00000123095.6	BHLHE41	protein_coding	BHLHE41-201	protein_coding	3743	5	4	Low Confidence
ENST00000242728.5	F7/D6	2	0.261509	-1.93563	2.79628	ENST00000242728.5 F7/D6	0.00694217	ENSG00000123095.6	BHLHE41	protein_coding	BHLHE41-201	protein_coding	3743	5	4	Medium Confidence
ENST00000242776.9	D5/D6	4	1.40103	0.486391	0.678391	ENST00000242776.9 D5/D6	0.000659677	ENSG00000123136.15	DDX39A	protein_coding	DDX39A-201	protein_coding	1498	11	10	High Confidence
ENST00000242776.9	F7/D6	3	0.816887	-0.291808	0.341632	ENST00000242776.9 F7/D6	0.0202725	ENSG00000123136.15	DDX39A	protein_coding	DDX39A-201	protein_coding	1498	11	10	High Confidence
ENST00000242786.6	M8/D6	3	2.05037	1.03019	6.33101	ENST00000242786.6 M8/D6	0.0107999	ENSG00000123146.20	ADGRE5	protein_coding	ADGRE5-201	protein_coding	3190	20	19	Low Confidence
ENST00000242810.11	D5/D6	3	1.49371	0.578518	1.63445	ENST00000242810.11 D5/D6	0.00883	ENSG00000114796.16	KLHL24	protein_coding	KLHL24-201	protein_coding	7331	8	7	High Confidence
ENST00000243045.10	D5/D6	3	0.821531	-0.286744	4.71408	ENST00000243045.10 D5/D6	0.00477156	ENSG00000123353.10	ORMDL2	protein_coding	ORMDL2-201	protein_coding	2019	4	3	Low Confidence
ENST00000243045.10	F7/D6	3	0.75251	-0.410914	2.21391	ENST00000243045.10 F7/D6	0.0036729	ENSG00000123353.10	ORMDL2	protein_coding	ORMDL2-201	protein_coding	2019	4	3	Medium Confidence
ENST00000243189.12	M8/D6	3	1.56561	0.630535	10.1879	ENST00000243189.12 M8/D6	0.0141854	ENSG00000117616.18	RSRP1	protein_coding	RSRP1-201	protein_coding	1425	5	4	Low Confidence
ENST00000243253.8	D5/D6	3	0.79207	-0.337813	3.21473	ENST00000243253.8 D5/D6	0.111611	ENSG00000058262.11	SEC61A1	protein_coding	SEC61A1-201	protein_coding	3568	12	11	Medium Confidence
ENST00000243253.8	M8/D6	3	0.676943	-0.562947	0.608267	ENST00000243253.8 M8/D6	0.000883631	ENSG00000058262.11	SEC61A1	protein_coding	SEC61A1-201	protein_coding	3568	12	11	High Confidence
ENST00000243286.7	F7/D6	2	1.53395	0.616529	3.16217	ENST00000243286.7 F7/D6	0.0109992	ENSG00000196507.11	TCEAL3	protein_coding	TCEAL3-201	protein_coding	1124	3	2	Medium Confidence
ENST00000243286.7	M8/D6	2	1.34462	0.426652	2.74562	ENST00000243286.7 M8/D6	0.0426094	ENSG00000196507.11	TCEAL3	protein_coding	TCEAL3-201	protein_coding	1124	3	2	Medium Confidence
ENST00000243346.10	F7/D6	4	0.789445	-0.341193	0.68921	ENST00000243346.10 F7/D6	0.00557348	ENSG00000123609.11	NMI	protein_coding	NMI-201	protein_coding	1229	8	7	High Confidence
ENST00000243346.10	M8/D6	4	1.26003	0.333419	0.393321	ENST00000243346.10 M8/D6	0.00220035	ENSG00000123609.11	NMI	protein_coding	NMI-201	protein_coding	1229	8	7	High Confidence
ENST00000243347.5	D5/D6	3	0.22481	-2.15362	1.65533	ENST00000243347.5 D5/D6	3.65385e-05	ENSG00000123610.5	TNFAIP6	protein_coding	TNFAIP6-201	protein_coding	1422	6	5	High Confidence
ENST00000243347.5	M8/D6	3	1.41542	0.500901	1.50595	ENST00000243347.5 M8/D6	0.0170661	ENSG00000123610.5	TNFAIP6	protein_coding	TNFAIP6-201	protein_coding	1422	6	5	High Confidence
ENST00000243440.2	D5/D6	3	0.748655	-0.419618	3.73875	ENST00000243440.2 D5/D6	0.0230183	ENSG00000123685.9	BATF3	protein_coding	BATF3-201	protein_coding	836	3	2	Low Confidence
ENST00000243440.2	F7/D6	3	0.789827	-0.342051	3.40025	ENST00000243440.2 F7/D6	0.0468839	ENSG00000123685.9	BATF3	protein_coding	BATF3-201	protein_coding	836	3	2	Medium Confidence
ENST00000243498.10	D5/D6	3	1.34025	0.422444	0.61832	ENST00000243498.10 D5/D6	0.00118268	ENSG00000123737.13	EXOSC9	protein_coding	EXOSC9-201	protein_coding	1587	12	11	High Confidence
ENST00000243498.10	F7/D6	3	1.16082	0.214991	1.01445	ENST00000243498.10 F7/D6	0.0337498	ENSG00000123737.13	EXOSC9	protein_coding	EXOSC9-201	protein_coding	1587	12	11	High Confidence
ENST00000243563.8	D5/D6	3	1.42691	0.51099	3.5885	ENST00000243563.8 D5/D6	0.00153738	ENSG00000077312.9	SNRPA	protein_coding	SNRPA-201	protein_coding	1277	6	5	Medium Confidence
ENST00000243662.11	D5/D6	4	1.276	0.351526	0.685045	ENST00000243662.11 D5/D6	0.0571447	ENSG00000123892.12	RAB38	protein_coding	RAB38-201	protein_coding	1432	3	2	High Confidence
ENST00000243662.11	F7/D6	4	1.61791	0.694038	0.657421	ENST00000243662.11 F7/D6	0.00490386	ENSG00000123892.12	RAB38	protein_coding	RAB38-201	protein_coding	1432	3	2	High Confidence
ENST00000243662.11	M8/D6	4	1.90385	0.928648	1.12022	ENST00000243662.11 M8/D6	0.000583373	ENSG00000123892.12	RAB38	protein_coding	RAB38-201	protein_coding	1432	3	2	High Confidence
ENST00000243776.11	M8/D6	3	0.613965	-0.703807	0.499756	ENST00000243776.11 M8/D6	0.00383912	ENSG00000123989.15	CHPF	protein_coding	CHPF-201	protein_coding	3028	4	3	High Confidence
ENST00000243918.10	F7/D6	3	0.712579	-0.489442	1.96157	ENST00000243918.10 F7/D6	0.00339325	ENSG00000204070.10	SYS1	protein_coding	SYS1-201	protein_coding	2728	4	3	Medium Confidence
ENST00000243918.10	M8/D6	2	0.864917	-0.209375	0.339813	ENST00000243918.10 M8/D6	0.0871494	ENSG00000204070.10	SYS1	protein_coding	SYS1-201	protein_coding	2728	4	3	Low Confidence
ENST00000243997.8	D5/D6	3	0.791137	-0.339141	2.79725	ENST00000243997.8 D5/D6	0.0058672	ENSG00000124172.10	ATP5F1E	protein_coding	ATP5F1E-201	protein_coding	3610	3	2	Medium Confidence
ENST00000244020.5	D5/D6	2	1.1868	0.247062	0.40001	ENST00000244020.5 D5/D6	0.0494449	ENSG00000124193.16	SRSF6	protein_coding	SRSF6-201	protein_coding	4353	6	5	Low Confidence
ENST00000244020.5	F7/D6	3	0.913308	-0.130995	1.08595	ENST00000244020.5 F7/D6	0.0599967	ENSG00000124193.16	SRSF6	protein_coding	SRSF6-201	protein_coding	4353	6	5	High Confidence
ENST00000244020.5	M8/D6	3	0.787231	-0.346532	3.13409	ENST00000244020.5 M8/D6	0.0066656	ENSG00000124193.16	SRSF6	protein_coding	SRSF6-201	protein_coding	4353	6	5	Medium Confidence
ENST00000244051.3	D5/D6	3	1.39681	0.481681	1.78414	ENST00000244051.3 D5/D6	0.112447	ENSG00000124217.5	MOCS3	protein_coding	MOCS3-201	protein_coding	5112	1	0	High Confidence
ENST00000244230.7	D5/D6	4	1.29478	0.372214	1.50561	ENST00000244230.7 D5/D6	0.0312088	ENSG00000124383.11	MPHOSPH10	protein_coding	MPHOSPH10-201	protein_coding	2164	11	10	High Confidence
ENST00000244520.10	M8/D6	2	0.872126	-0.197394	0.188455	ENST00000244520.10 M8/D6	0.0828402	ENSG00000124562.10	SNRPC	protein_coding	SNRPC-201	protein_coding	806	6	5	Low Confidence
ENST00000244741.10	D5/D6	4	0.612852	-0.706398	0.206037	ENST00000244741.10 D5/D6	0.000175237	ENSG00000124762.14	CDKN1A	protein_coding	CDKN1A-201	protein_coding	2117	3	2	High Confidence
ENST00000244741.10	F7/D6	2	0.898796	-0.154028	1.13753	ENST00000244741.10 F7/D6	0.132581	ENSG00000124762.14	CDKN1A	protein_coding	CDKN1A-201	protein_coding	2117	3	2	Low Confidence
ENST00000244741.10	M8/D6	4	1.22863	0.296888	0.853348	ENST00000244741.10 M8/D6	0.0150474	ENSG00000124762.14	CDKN1A	protein_coding	CDKN1A-201	protein_coding	2117	3	2	High Confidence
ENST00000244745.4	D5/D6	3	0.65082	-0.620319	2.11898	ENST00000244745.4 D5/D6	0.00288907	ENSG00000124766.7	SOX4	protein_coding	SOX4-201	protein_coding	4869	1	0	Medium Confidence
ENST00000244745.4	M8/D6	2	1.17628	0.233975	1.89807	ENST00000244745.4 M8/D6	0.153798	ENSG00000124766.7	SOX4	protein_coding	SOX4-201	protein_coding	4869	1	0	Medium Confidence
ENST00000244763.9	M8/D6	3	0.811023	-0.303515	3.02137	ENST00000244763.9 M8/D6	0.0157908	ENSG00000124783.14	SSR1	protein_coding	SSR1-201	protein_coding	9661	8	7	Medium Confidence
ENST00000244815.9	D5/D6	2	1.27313	0.34793	2.49333	ENST00000244815.9 D5/D6	0.187213	ENSG00000124831.20	LRRFIP1	protein_coding	LRRFIP1-201	protein_coding	4370	10	9	Medium Confidence
ENST00000245105.8	D5/D6	3	0.538424	-0.911613	10.9786	ENST00000245105.8 D5/D6	0.0511331	ENSG00000125089.18	SH3TC1	protein_coding	SH3TC1-201	protein_coding	4303	18	17	Low Confidence
ENST00000245105.8	F7/D6	3	0.663448	-0.609303	10.9565	ENST00000245105.8 F7/D6	0.0332418	ENSG00000125089.18	SH3TC1	protein_coding	SH3TC1-201	protein_coding	4303	18	17	Low Confidence
ENST00000245105.8	M8/D6	2	0.543053	-0.904097	17.8138	ENST00000245105.8 M8/D6	0.0156639	ENSG00000125089.18	SH3TC1	protein_coding	SH3TC1-201	protein_coding	4303	18	17	Low Confidence
ENST00000245157.11	D5/D6	2	0.773707	-0.370152	0.408779	ENST00000245157.11 D5/D6	0.0909864	ENSG00000125124.14	BBS2	protein_coding	BBS2-201	protein_coding	2704	17	16	Low Confidence
ENST00000245157.11	M8/D6	3	0.932149	-0.101482	0.89044	ENST00000245157.11 M8/D6	0.396941	ENSG00000125124.14	BBS2	protein_coding	BBS2-201	protein_coding	2704	17	16	High Confidence
ENST00000245185.6	D5/D6	3	0.72026	-0.474174	2.31824	ENST00000245185.6 D5/D6	0.000869678	ENSG00000125148.7	MT2A	protein_coding	MT2A-201	protein_coding	401	3	2	Medium Confidence
ENST00000245185.6	M8/D6	3	0.828531	-0.271515	0.994324	ENST00000245185.6 M8/D6	0.00849081	ENSG00000125148.7	MT2A	protein_coding	MT2A-201	protein_coding	401	3	2	High Confidence
ENST00000245206.10	F7/D6	3	1.22765	0.295881	0.364457	ENST00000245206.10 F7/D6	0.0131321	ENSG00000125166.13	GOT2	protein_coding	GOT2-201	protein_coding	2421	10	9	High Confidence
ENST00000245414.9	D5/D6	3	0.789002	-0.343884	3.68119	ENST00000245414.9 D5/D6	0.00544676	ENSG00000125347.15	IRF1	protein_coding	IRF1-201	protein_coding	3554	10	9	Medium Confidence
ENST00000245414.9	F7/D6	3	0.804918	-0.315075	3.74658	ENST00000245414.9 F7/D6	0.0341416	ENSG00000125347.15	IRF1	protein_coding	IRF1-201	protein_coding	3554	10	9	Low Confidence
ENST00000245458.11	D5/D6	3	1.20394	0.267724	0.530475	ENST00000245458.11 D5/D6	0.00228031	ENSG00000213741.11	RPS29	protein_coding	RPS29-201	protein_coding	295	3	2	High Confidence
ENST00000245458.11	F7/D6	3	1.11577	0.157922	0.914551	ENST00000245458.11 F7/D6	0.0352099	ENSG00000213741.11	RPS29	protein_coding	RPS29-201	protein_coding	295	3	2	High Confidence
ENST00000245479.3	M8/D6	3	3.20039	1.67745	2.3605	ENST00000245479.3 M8/D6	1.08442e-05	ENSG00000125398.8	SOX9	protein_coding	SOX9-201	protein_coding	3931	3	2	Medium Confidence
ENST00000245539.11	M8/D6	2	0.834005	-0.261878	0.26552	ENST00000245539.11 M8/D6	0.0487898	ENSG00000125445.11	MRPS7	protein_coding	MRPS7-201	protein_coding	1204	5	4	Low Confidence
ENST00000245543.6	F7/D6	3	0.696806	-0.521476	1.46373	ENST00000245543.6 F7/D6	0.0564407	ENSG00000125449.7	ARMC7	protein_coding	ARMC7-201	protein_coding	2151	3	2	High Confidence
ENST00000245544.9	D5/D6	2	1.11129	0.15222	0.452841	ENST00000245544.9 D5/D6	0.0794024	ENSG00000125450.11	NUP85	protein_coding	NUP85-201	protein_coding	2133	19	18	Low Confidence
ENST00000245564.8	D5/D6	2	1.24135	0.311895	0.529016	ENST00000245564.8 D5/D6	0.0691234	ENSG00000125459.18	MSTO1	protein_coding	MSTO1-201	protein_coding	2422	14	13	Low Confidence
ENST00000245564.8	M8/D6	2	0.720598	-0.473566	3.39692	ENST00000245564.8 M8/D6	0.0223596	ENSG00000125459.18	MSTO1	protein_coding	MSTO1-201	protein_coding	2422	14	13	Medium Confidence
ENST00000245787.9	D5/D6	3	0.684086	-0.549156	3.10939	ENST00000245787.9 D5/D6	0.0510129	ENSG00000125629.16	INSIG2	protein_coding	INSIG2-201	protein_coding	3562	6	5	Medium Confidence
ENST00000245796.11	F7/D6	2	0.878513	-0.186869	0.275027	ENST00000245796.11 F7/D6	0.204409	ENSG00000125637.16	PSD4	protein_coding	PSD4-201	protein_coding	11342	17	16	Low Confidence
ENST00000245812.8	F7/D6	3	1.16983	0.225548	2.30066	ENST00000245812.8 F7/D6	0.0425265	ENSG00000125652.8	ALKBH7	protein_coding	ALKBH7-201	protein_coding	970	4	3	Medium Confidence
ENST00000245816.11	D5/D6	2	0.942229	-0.0861319	1.97633	ENST00000245816.11 D5/D6	0.024692	ENSG00000125656.11	CLPP	protein_coding	CLPP-201	protein_coding	2410	6	5	Medium Confidence
ENST00000245817.5	M8/D6	3	1.25179	0.323767	1.23525	ENST00000245817.5 M8/D6	0.0201207	ENSG00000125657.5	TNFSF9	protein_coding	TNFSF9-201	protein_coding	1634	3	2	High Confidence
ENST00000245903.4	D5/D6	4	0.791781	-0.337153	1.22069	ENST00000245903.4 D5/D6	0.00257533	ENSG00000125726.11	CD70	protein_coding	CD70-201	protein_coding	911	3	2	High Confidence
ENST00000245903.4	M8/D6	3	1.16467	0.21984	0.732094	ENST00000245903.4 M8/D6	0.0142015	ENSG00000125726.11	CD70	protein_coding	CD70-201	protein_coding	911	3	2	High Confidence
ENST00000245925.8	D5/D6	2	0.89212	-0.16478	1.11516	ENST00000245925.8 D5/D6	0.0234638	ENSG00000125746.18	EML2	protein_coding	EML2-201	protein_coding	2234	19	18	Low Confidence
ENST00000245932.11	M8/D6	4	1.31543	0.395035	1.53587	ENST00000245932.11 M8/D6	0.0242825	ENSG00000125753.15	VASP	protein_coding	VASP-201	protein_coding	2242	13	12	High Confidence
ENST00000245960.10	M8/D6	2	1.28753	0.354691	11.6871	ENST00000245960.10 M8/D6	0.0801898	ENSG00000101224.18	CDC25B	protein_coding	CDC25B-201	protein_coding	3119	16	15	Low Confidence
ENST00000246024.7	M8/D6	3	1.27224	0.34635	2.67502	ENST00000246024.7 M8/D6	0.030781	ENSG00000125827.9	TMX4	protein_coding	TMX4-201	protein_coding	6103	8	7	Medium Confidence
ENST00000246069.12	D5/D6	2	0.732342	-0.449414	0.199378	ENST00000246069.12 D5/D6	0.00529275	ENSG00000125868.16	DSTN	protein_coding	DSTN-201	protein_coding	3405	4	3	Low Confidence
ENST00000246069.12	M8/D6	2	0.528353	-0.920426	0.129174	ENST00000246069.12 M8/D6	2.45296e-05	ENSG00000125868.16	DSTN	protein_coding	DSTN-201	protein_coding	3405	4	3	Low Confidence
ENST00000246070.3	D5/D6	4	0.27158	-1.88081	1.08957	ENST00000246070.3 D5/D6	0.000103303	ENSG00000125869.10	LAMP5	protein_coding	LAMP5-201	protein_coding	1810	6	5	High Confidence
ENST00000246070.3	F7/D6	4	2.35836	1.23669	2.25979	ENST00000246070.3 F7/D6	0.000125268	ENSG00000125869.10	LAMP5	protein_coding	LAMP5-201	protein_coding	1810	6	5	Medium Confidence
ENST00000246070.3	M8/D6	4	2.12286	1.08458	2.55006	ENST00000246070.3 M8/D6	0.000349797	ENSG00000125869.10	LAMP5	protein_coding	LAMP5-201	protein_coding	1810	6	5	Medium Confidence
ENST00000246071.8	F7/D6	2	1.18298	0.242398	0.557517	ENST00000246071.8 F7/D6	0.0284846	ENSG00000125870.11	SNRPB2	protein_coding	SNRPB2-201	protein_coding	2411	7	6	Low Confidence
ENST00000246112.9	D5/D6	3	0.482021	-1.05412	2.98923	ENST00000246112.9 D5/D6	0.00678221	ENSG00000104953.20	TLE6	protein_coding	TLE6-201	protein_coding	1977	17	16	Medium Confidence
ENST00000246112.9	M8/D6	2	0.611109	-0.710508	0.356809	ENST00000246112.9 M8/D6	0.0761918	ENSG00000104953.20	TLE6	protein_coding	TLE6-201	protein_coding	1977	17	16	Low Confidence
ENST00000246115.5	D5/D6	3	0.731014	-0.452561	1.93122	ENST00000246115.5 D5/D6	0.0067131	ENSG00000125910.6	S1PR4	protein_coding	S1PR4-201	protein_coding	1564	1	0	Medium Confidence
ENST00000246115.5	F7/D6	3	0.693014	-0.529218	1.10057	ENST00000246115.5 F7/D6	0.0111533	ENSG00000125910.6	S1PR4	protein_coding	S1PR4-201	protein_coding	1564	1	0	High Confidence
ENST00000246115.5	M8/D6	3	0.670985	-0.576192	1.95285	ENST00000246115.5 M8/D6	0.00903711	ENSG00000125910.6	S1PR4	protein_coding	S1PR4-201	protein_coding	1564	1	0	Medium Confidence
ENST00000246117.9	M8/D6	3	0.803627	-0.316311	2.4998	ENST00000246117.9 M8/D6	0.0207789	ENSG00000125912.11	NCLN	protein_coding	NCLN-201	protein_coding	3680	15	14	Medium Confidence
ENST00000246337.9	D5/D6	3	0.854158	-0.227604	1.10743	ENST00000246337.9 D5/D6	0.0402758	ENSG00000126088.14	UROD	protein_coding	UROD-201	protein_coding	1193	10	9	High Confidence
ENST00000246532.6	D5/D6	3	0.606459	-0.72161	0.795003	ENST00000246532.6 D5/D6	0.00175333	ENSG00000126246.10	IGFLR1	protein_coding	IGFLR1-201	protein_coding	1647	5	4	High Confidence
ENST00000246535.4	D5/D6	3	1.9801	0.985439	0.963637	ENST00000246535.4 D5/D6	3.6597e-05	ENSG00000126249.8	PDCD2L	protein_coding	PDCD2L-201	protein_coding	1157	7	6	High Confidence
ENST00000246548.9	D5/D6	3	1.16762	0.22313	1.74328	ENST00000246548.9 D5/D6	0.016405	ENSG00000126261.13	UBA2	protein_coding	UBA2-201	protein_coding	4005	17	16	High Confidence
ENST00000246553.4	D5/D6	2	0.552939	-0.903174	25.4662	ENST00000246553.4 D5/D6	0.0571718	ENSG00000126266.4	FFAR1	protein_coding	FFAR1-201	protein_coding	5597	2	1	Low Confidence
ENST00000246657.2	D5/D6	4	0.554757	-0.850175	0.691639	ENST00000246657.2 D5/D6	1.98784e-05	ENSG00000126353.3	CCR7	protein_coding	CCR7-201	protein_coding	2173	3	2	High Confidence
ENST00000246657.2	F7/D6	4	1.649	0.721501	0.642751	ENST00000246657.2 F7/D6	2.45949e-05	ENSG00000126353.3	CCR7	protein_coding	CCR7-201	protein_coding	2173	3	2	High Confidence
ENST00000246657.2	M8/D6	4	0.368242	-1.44133	0.514838	ENST00000246657.2 M8/D6	1.73947e-07	ENSG00000126353.3	CCR7	protein_coding	CCR7-201	protein_coding	2173	3	2	High Confidence
ENST00000246672.4	D5/D6	2	1.31969	0.400203	0.00227399	ENST00000246672.4 D5/D6	0.0411858	ENSG00000126368.6	NR1D1	protein_coding	NR1D1-201	protein_coding	2630	8	7	Low Confidence
ENST00000246747.9	D5/D6	3	1.34515	0.427754	0.236006	ENST00000246747.9 D5/D6	0.00748024	ENSG00000213465.8	ARL2	protein_coding	ARL2-201	protein_coding	932	5	4	High Confidence
ENST00000246802.10	D5/D6	3	1.11923	0.162477	0.432725	ENST00000246802.10 D5/D6	0.0196658	ENSG00000105373.19	NOP53	protein_coding	NOP53-201	protein_coding	1504	13	12	High Confidence
ENST00000246802.10	F7/D6	3	1.33872	0.420394	1.78434	ENST00000246802.10 F7/D6	0.0100609	ENSG00000105373.19	NOP53	protein_coding	NOP53-201	protein_coding	1504	13	12	High Confidence
ENST00000246868.7	D5/D6	3	1.29402	0.371638	1.23937	ENST00000246868.7 D5/D6	0.0440927	ENSG00000126524.12	SBDS	protein_coding	SBDS-201	protein_coding	1613	5	4	High Confidence
ENST00000246868.7	F7/D6	3	1.83936	0.877608	3.35179	ENST00000246868.7 F7/D6	4.26818e-05	ENSG00000126524.12	SBDS	protein_coding	SBDS-201	protein_coding	1613	5	4	Medium Confidence
ENST00000246957.10	D5/D6	4	1.62767	0.702393	1.3759	ENST00000246957.10 D5/D6	0.00020232	ENSG00000126602.11	TRAP1	protein_coding	TRAP1-201	protein_coding	2223	18	17	High Confidence
ENST00000246957.10	M8/D6	4	0.909404	-0.13705	0.445701	ENST00000246957.10 M8/D6	0.0320732	ENSG00000126602.11	TRAP1	protein_coding	TRAP1-201	protein_coding	2223	18	17	High Confidence
ENST00000247003.9	D5/D6	3	1.38763	0.472467	1.0396	ENST00000247003.9 D5/D6	0.00268998	ENSG00000105671.12	DDX49	protein_coding	DDX49-201	protein_coding	1793	13	12	High Confidence
ENST00000247020.9	D5/D6	2	0.849216	-0.235883	1.09397	ENST00000247020.9 D5/D6	0.00913834	ENSG00000132581.10	SDF2	protein_coding	SDF2-201	protein_coding	1309	3	2	Low Confidence
ENST00000247020.9	F7/D6	2	0.831417	-0.266357	0.1127	ENST00000247020.9 F7/D6	0.0637646	ENSG00000132581.10	SDF2	protein_coding	SDF2-201	protein_coding	1309	3	2	Low Confidence
ENST00000247191.7	M8/D6	4	2.56681	1.3598	0.889787	ENST00000247191.7 M8/D6	0.00030421	ENSG00000126787.13	DLGAP5	protein_coding	DLGAP5-201	protein_coding	2881	19	18	High Confidence
ENST00000247225.7	D5/D6	3	1.91083	0.934029	1.09712	ENST00000247225.7 D5/D6	0.0012598	ENSG00000126821.8	SGPP1	protein_coding	SGPP1-201	protein_coding	3336	3	2	High Confidence
ENST00000247225.7	M8/D6	3	1.12733	0.172911	0.119984	ENST00000247225.7 M8/D6	0.346868	ENSG00000126821.8	SGPP1	protein_coding	SGPP1-201	protein_coding	3336	3	2	High Confidence
ENST00000247461.9	D5/D6	2	1.17202	0.228996	0.0315986	ENST00000247461.9 D5/D6	0.0555683	ENSG00000127022.16	CANX	protein_coding	CANX-201	protein_coding	4915	15	14	Low Confidence
ENST00000247461.9	M8/D6	3	0.833708	-0.263022	2.08949	ENST00000247461.9 M8/D6	0.0399891	ENSG00000127022.16	CANX	protein_coding	CANX-201	protein_coding	4915	15	14	Medium Confidence
ENST00000247470.10	D5/D6	3	0.763042	-0.390471	1.45658	ENST00000247470.10 D5/D6	0.126111	ENSG00000103490.14	PYCARD	protein_coding	PYCARD-201	protein_coding	757	3	2	High Confidence
ENST00000247470.10	F7/D6	3	0.501378	-0.996968	2.56184	ENST00000247470.10 F7/D6	0.000233491	ENSG00000103490.14	PYCARD	protein_coding	PYCARD-201	protein_coding	757	3	2	Medium Confidence
ENST00000247655.4	D5/D6	2	0.932387	-0.101124	1.31701	ENST00000247655.4 D5/D6	0.095768	ENSG00000127184.13	COX7C	protein_coding	COX7C-201	protein_coding	629	3	2	Low Confidence
ENST00000247665.12	D5/D6	3	0.682027	-0.552701	2.02873	ENST00000247665.12 D5/D6	0.00070073	ENSG00000054148.18	PHPT1	protein_coding	PHPT1-201	protein_coding	577	3	2	Medium Confidence
ENST00000247665.12	M8/D6	3	0.772554	-0.372384	0.795201	ENST00000247665.12 M8/D6	0.0059989	ENSG00000054148.18	PHPT1	protein_coding	PHPT1-201	protein_coding	577	3	2	High Confidence
ENST00000247843.7	D5/D6	2	1.28118	0.357453	0.473419	ENST00000247843.7 D5/D6	0.0203912	ENSG00000127337.7	YEATS4	protein_coding	YEATS4-201	protein_coding	1468	7	6	Low Confidence
ENST00000247866.9	D5/D6	2	0.99446	-0.00803272	0.49987	ENST00000247866.9 D5/D6	0.0465191	ENSG00000090266.13	NDUFB2	protein_coding	NDUFB2-201	protein_coding	465	4	3	Low Confidence
ENST00000247866.9	M8/D6	3	0.830679	-0.267654	0.334096	ENST00000247866.9 M8/D6	0.0372382	ENSG00000090266.13	NDUFB2	protein_coding	NDUFB2-201	protein_coding	465	4	3	High Confidence
ENST00000247970.9	D5/D6	3	0.819115	-0.288148	1.40406	ENST00000247970.9 D5/D6	0.0683232	ENSG00000127445.14	PIN1	protein_coding	PIN1-201	protein_coding	1009	4	3	High Confidence
ENST00000248070.10	M8/D6	3	1.67494	0.73708	7.09849	ENST00000248070.10 M8/D6	0.0493409	ENSG00000127527.14	EPS15L1	protein_coding	EPS15L1-201	protein_coding	2924	23	22	Low Confidence
ENST00000248071.6	D5/D6	2	0.444004	-1.17139	0.706999	ENST00000248071.6 D5/D6	0.0822064	ENSG00000127528.6	KLF2	protein_coding	KLF2-201	protein_coding	2820	3	2	Low Confidence
ENST00000248121.7	D5/D6	3	0.79173	-0.337987	2.70218	ENST00000248121.7 D5/D6	0.191338	ENSG00000127561.16	SYNGR3	protein_coding	SYNGR3-201	protein_coding	2026	4	3	Medium Confidence
ENST00000248244.6	D5/D6	4	1.61439	0.690452	1.56441	ENST00000248244.6 D5/D6	0.0057873	ENSG00000127666.11	TICAM1	protein_coding	TICAM1-201	protein_coding	2684	2	1	High Confidence
ENST00000248244.6	F7/D6	3	0.772362	-0.373024	1.59907	ENST00000248244.6 F7/D6	0.0236047	ENSG00000127666.11	TICAM1	protein_coding	TICAM1-201	protein_coding	2684	2	1	High Confidence
ENST00000248244.6	M8/D6	3	0.754961	-0.406058	1.93244	ENST00000248244.6 M8/D6	0.0283587	ENSG00000127666.11	TICAM1	protein_coding	TICAM1-201	protein_coding	2684	2	1	Medium Confidence
ENST00000248342.9	D5/D6	3	1.3462	0.428793	0.809437	ENST00000248342.9 D5/D6	0.00130341	ENSG00000178982.10	EIF3K	protein_coding	EIF3K-201	protein_coding	772	8	7	High Confidence
ENST00000248342.9	F7/D6	3	1.10694	0.146468	0.857137	ENST00000248342.9 F7/D6	0.184909	ENSG00000178982.10	EIF3K	protein_coding	EIF3K-201	protein_coding	772	8	7	High Confidence
ENST00000248437.9	D5/D6	2	0.710349	-0.493774	2.2759	ENST00000248437.9 D5/D6	0.00393355	ENSG00000127824.15	TUBA4A	protein_coding	TUBA4A-201	protein_coding	2049	4	3	Medium Confidence
ENST00000248437.9	F7/D6	3	0.747475	-0.420575	2.17447	ENST00000248437.9 F7/D6	0.00922159	ENSG00000127824.15	TUBA4A	protein_coding	TUBA4A-201	protein_coding	2049	4	3	Medium Confidence
ENST00000248437.9	M8/D6	2	1.19708	0.259461	0.878867	ENST00000248437.9 M8/D6	0.152439	ENSG00000127824.15	TUBA4A	protein_coding	TUBA4A-201	protein_coding	2049	4	3	Low Confidence
ENST00000248450.9	D5/D6	2	1.32431	0.404143	3.90453	ENST00000248450.9 D5/D6	0.0169146	ENSG00000127837.10	AAMP	protein_coding	AAMP-201	protein_coding	1760	11	10	Low Confidence
ENST00000248553.7	D5/D6	4	0.294405	-1.76842	4.43062	ENST00000248553.7 D5/D6	7.39437e-07	ENSG00000106211.10	HSPB1	protein_coding	HSPB1-201	protein_coding	777	3	2	Low Confidence
ENST00000248553.7	F7/D6	3	0.67555	-0.566144	1.38458	ENST00000248553.7 F7/D6	0.000834999	ENSG00000106211.10	HSPB1	protein_coding	HSPB1-201	protein_coding	777	3	2	High Confidence
ENST00000248553.7	M8/D6	4	0.312693	-1.67819	2.15073	ENST00000248553.7 M8/D6	5.07868e-06	ENSG00000106211.10	HSPB1	protein_coding	HSPB1-201	protein_coding	777	3	2	Medium Confidence
ENST00000248564.6	F7/D6	2	1.65268	0.724803	0.280624	ENST00000248564.6 F7/D6	0.00218389	ENSG00000127920.6	GNG11	protein_coding	GNG11-201	protein_coding	3019	2	1	Low Confidence
ENST00000248566.4	D5/D6	2	0.888505	-0.170568	0.534351	ENST00000248566.4 D5/D6	0.216833	ENSG00000127922.10	SEM1	protein_coding	SEM1-201	protein_coding	458	3	2	Low Confidence
ENST00000248594.11	M8/D6	3	1.38901	0.473879	1.09146	ENST00000248594.11 M8/D6	0.0173787	ENSG00000127947.16	PTPN12	protein_coding	PTPN12-201	protein_coding	3384	18	17	High Confidence
ENST00000248899.11	D5/D6	3	0.891619	-0.165513	0.284415	ENST00000248899.11 D5/D6	0.0272383	ENSG00000100365.16	NCF4	protein_coding	NCF4-201	protein_coding	1378	10	9	High Confidence
ENST00000248899.11	F7/D6	2	0.852269	-0.230698	1.04042	ENST00000248899.11 F7/D6	0.133747	ENSG00000100365.16	NCF4	protein_coding	NCF4-201	protein_coding	1378	10	9	Low Confidence
ENST00000248899.11	M8/D6	3	1.31554	0.395655	0.119361	ENST00000248899.11 M8/D6	0.0165286	ENSG00000100365.16	NCF4	protein_coding	NCF4-201	protein_coding	1378	10	9	High Confidence
ENST00000248901.11	D5/D6	3	0.390744	-1.35688	2.83547	ENST00000248901.11 D5/D6	0.000694756	ENSG00000100055.21	CYTH4	protein_coding	CYTH4-201	protein_coding	3077	13	12	Medium Confidence
ENST00000248901.11	F7/D6	3	0.610993	-0.713389	4.20517	ENST00000248901.11 F7/D6	0.00888113	ENSG00000100055.21	CYTH4	protein_coding	CYTH4-201	protein_coding	3077	13	12	Low Confidence
ENST00000248924.11	D5/D6	3	1.57041	0.650545	2.03846	ENST00000248924.11 D5/D6	0.0146593	ENSG00000100116.17	GCAT	protein_coding	GCAT-201	protein_coding	1473	9	8	Medium Confidence
ENST00000248924.11	F7/D6	2	1.50247	0.587304	0.708988	ENST00000248924.11 F7/D6	0.00917924	ENSG00000100116.17	GCAT	protein_coding	GCAT-201	protein_coding	1473	9	8	Low Confidence
ENST00000248929.14	D5/D6	2	0.643214	-0.641938	8.56355	ENST00000248929.14 D5/D6	0.0378836	ENSG00000100359.21	SGSM3	protein_coding	SGSM3-201	protein_coding	2986	22	21	Low Confidence
ENST00000248948.4	D5/D6	3	0.69881	-0.518974	3.63012	ENST00000248948.4 D5/D6	0.019126	ENSG00000128218.8	VPREB3	protein_coding	VPREB3-201	protein_coding	567	2	1	Medium Confidence
ENST00000248948.4	F7/D6	3	0.498739	-1.00369	0.577242	ENST00000248948.4 F7/D6	0.000211978	ENSG00000128218.8	VPREB3	protein_coding	VPREB3-201	protein_coding	567	2	1	High Confidence
ENST00000248948.4	M8/D6	3	1.76306	0.815826	4.00357	ENST00000248948.4 M8/D6	0.000640911	ENSG00000128218.8	VPREB3	protein_coding	VPREB3-201	protein_coding	567	2	1	Low Confidence
ENST00000248958.5	D5/D6	3	0.644109	-0.634711	0.777999	ENST00000248958.5 D5/D6	0.000353552	ENSG00000128228.5	SDF2L1	protein_coding	SDF2L1-201	protein_coding	825	3	2	High Confidence
ENST00000248958.5	M8/D6	3	0.562866	-0.829438	1.4469	ENST00000248958.5 M8/D6	0.000199593	ENSG00000128228.5	SDF2L1	protein_coding	SDF2L1-201	protein_coding	825	3	2	High Confidence
ENST00000248975.6	D5/D6	2	1.19321	0.253424	4.4386	ENST00000248975.6 D5/D6	0.0564103	ENSG00000128245.15	YWHAH	protein_coding	YWHAH-201	protein_coding	1751	2	1	Low Confidence
ENST00000248975.6	F7/D6	3	0.80382	-0.315904	2.44418	ENST00000248975.6 F7/D6	0.0734046	ENSG00000128245.15	YWHAH	protein_coding	YWHAH-201	protein_coding	1751	2	1	Medium Confidence
ENST00000249064.9	D5/D6	3	0.726554	-0.460928	0.701013	ENST00000249064.9 D5/D6	0.187993	ENSG00000159873.10	CCDC117	protein_coding	CCDC117-201	protein_coding	3964	5	4	High Confidence
ENST00000249071.11	D5/D6	4	0.80594	-0.311359	0.691712	ENST00000249071.11 D5/D6	0.00024916	ENSG00000128340.16	RAC2	protein_coding	RAC2-201	protein_coding	1472	7	6	High Confidence
ENST00000249071.11	F7/D6	2	0.909625	-0.136656	0.00782431	ENST00000249071.11 F7/D6	0.0457181	ENSG00000128340.16	RAC2	protein_coding	RAC2-201	protein_coding	1472	7	6	Low Confidence
ENST00000249075.4	D5/D6	2	0.57166	-0.807487	3.15156	ENST00000249075.4 D5/D6	0.125896	ENSG00000128342.5	LIF	protein_coding	LIF-201	protein_coding	3871	3	2	Medium Confidence
ENST00000249075.4	F7/D6	3	2.41545	1.26803	5.46563	ENST00000249075.4 F7/D6	0.0437513	ENSG00000128342.5	LIF	protein_coding	LIF-201	protein_coding	3871	3	2	Low Confidence
ENST00000249209.8	M8/D6	3	0.72351	-0.466939	0.400206	ENST00000249209.8 M8/D6	0.0834087	ENSG00000128463.13	EMC4	protein_coding	EMC4-201	protein_coding	852	4	3	High Confidence
ENST00000249269.9	D5/D6	2	1.12415	0.168841	0.0113847	ENST00000249269.9 D5/D6	0.0352645	ENSG00000105819.15	PMPCB	protein_coding	PMPCB-201	protein_coding	3910	13	12	Low Confidence
ENST00000249269.9	F7/D6	3	1.17659	0.234402	1.18524	ENST00000249269.9 F7/D6	0.0205838	ENSG00000105819.15	PMPCB	protein_coding	PMPCB-201	protein_coding	3910	13	12	High Confidence
ENST00000249299.7	D5/D6	2	1.11359	0.155113	1.2015	ENST00000249299.7 D5/D6	0.274874	ENSG00000128534.8	LSM8	protein_coding	LSM8-201	protein_coding	12384	4	3	Low Confidence
ENST00000249299.7	M8/D6	3	1.17037	0.226119	2.43139	ENST00000249299.7 M8/D6	0.00908164	ENSG00000128534.8	LSM8	protein_coding	LSM8-201	protein_coding	12384	4	3	Medium Confidence
ENST00000249356.4	D5/D6	4	0.676116	-0.564716	0.516649	ENST00000249356.4 D5/D6	0.00154067	ENSG00000128590.5	DNAJB9	protein_coding	DNAJB9-201	protein_coding	2409	3	2	High Confidence
ENST00000249356.4	F7/D6	3	0.797338	-0.326934	1.1732	ENST00000249356.4 F7/D6	0.0122792	ENSG00000128590.5	DNAJB9	protein_coding	DNAJB9-201	protein_coding	2409	3	2	High Confidence
ENST00000249356.4	M8/D6	4	0.539426	-0.891328	1.93599	ENST00000249356.4 M8/D6	0.0001997	ENSG00000128590.5	DNAJB9	protein_coding	DNAJB9-201	protein_coding	2409	3	2	Medium Confidence
ENST00000249364.9	D5/D6	2	0.818521	-0.288971	0.932321	ENST00000249364.9 D5/D6	0.0405128	ENSG00000128595.17	CALU	protein_coding	CALU-201	protein_coding	5266	7	6	Low Confidence
ENST00000249364.9	M8/D6	2	0.719167	-0.475648	0.801279	ENST00000249364.9 M8/D6	0.00382179	ENSG00000128595.17	CALU	protein_coding	CALU-201	protein_coding	5266	7	6	Low Confidence
ENST00000249396.12	D5/D6	2	1.35358	0.434482	5.63927	ENST00000249396.12 D5/D6	0.130908	ENSG00000068903.21	SIRT2	protein_coding	SIRT2-201	protein_coding	1862	16	15	Low Confidence
ENST00000249442.11	D5/D6	2	1.14137	0.190729	0.7542	ENST00000249442.11 D5/D6	0.0683291	ENSG00000128654.14	MTX2	protein_coding	MTX2-201	protein_coding	1341	10	9	Low Confidence
ENST00000249647.8	D5/D6	4	0.867431	-0.20558	1.35368	ENST00000249647.8 D5/D6	0.0518354	ENSG00000092531.10	SNAP23	protein_coding	SNAP23-201	protein_coding	2310	8	7	High Confidence
ENST00000249700.9	D5/D6	2	1.20253	0.265948	1.34131	ENST00000249700.9 D5/D6	0.126018	ENSG00000128872.10	TMOD2	protein_coding	TMOD2-201	protein_coding	9150	10	9	Low Confidence
ENST00000249700.9	M8/D6	2	1.25316	0.325571	0.20748	ENST00000249700.9 M8/D6	0.061132	ENSG00000128872.10	TMOD2	protein_coding	TMOD2-201	protein_coding	9150	10	9	Low Confidence
ENST00000249776.13	F7/D6	2	0.679002	-0.558651	1.38631	ENST00000249776.13 F7/D6	0.0840898	ENSG00000128944.14	KNSTRN	protein_coding	KNSTRN-201	protein_coding	1757	9	8	Low Confidence
ENST00000249786.9	M8/D6	3	0.740352	-0.433994	1.38557	ENST00000249786.9 M8/D6	0.00506905	ENSG00000140264.21	SERF2	protein_coding	SERF2-201	protein_coding	2543	3	2	High Confidence
ENST00000249806.11	F7/D6	2	0.839751	-0.252147	1.58291	ENST00000249806.11 F7/D6	0.0296111	ENSG00000128973.13	CLN6	protein_coding	CLN6-201	protein_coding	2228	7	6	Low Confidence
ENST00000249806.11	M8/D6	3	0.898725	-0.154189	0.990899	ENST00000249806.11 M8/D6	0.159795	ENSG00000128973.13	CLN6	protein_coding	CLN6-201	protein_coding	2228	7	6	High Confidence
ENST00000249923.7	F7/D6	3	0.759333	-0.39724	0.563415	ENST00000249923.7 F7/D6	0.0640172	ENSG00000129083.13	COPB1	protein_coding	COPB1-201	protein_coding	3481	22	21	High Confidence
ENST00000249923.7	M8/D6	3	0.817482	-0.290814	0.716338	ENST00000249923.7 M8/D6	0.0805238	ENSG00000129083.13	COPB1	protein_coding	COPB1-201	protein_coding	3481	22	21	High Confidence
ENST00000250056.12	M8/D6	3	1.6428	0.71556	2.04284	ENST00000250056.12 M8/D6	0.0588077	ENSG00000129195.16	PIMREG	protein_coding	PIMREG-201	protein_coding	1473	5	4	Medium Confidence
ENST00000250092.11	D5/D6	3	0.526507	-0.929348	5.16944	ENST00000250092.11 D5/D6	0.0119476	ENSG00000129226.14	CD68	protein_coding	CD68-201	protein_coding	1705	6	5	Low Confidence
ENST00000250237.10	D5/D6	2	1.19258	0.254084	0.273541	ENST00000250237.10 D5/D6	0.0523233	ENSG00000213339.9	QTRT1	protein_coding	QTRT1-201	protein_coding	1329	10	9	Low Confidence
ENST00000250237.10	M8/D6	3	0.757803	-0.40012	0.31178	ENST00000250237.10 M8/D6	0.0317704	ENSG00000213339.9	QTRT1	protein_coding	QTRT1-201	protein_coding	1329	10	9	High Confidence
ENST00000250378.7	D5/D6	2	1.68335	0.751312	0.596776	ENST00000250378.7 D5/D6	0.0492786	ENSG00000092009.10	CMA1	protein_coding	CMA1-202	protein_coding	937	5	4	Low Confidence
ENST00000250454.8	D5/D6	2	1.14013	0.18919	0.204945	ENST00000250454.8 D5/D6	0.283131	ENSG00000129518.10	EAPP	protein_coding	EAPP-201	protein_coding	1303	6	5	Low Confidence
ENST00000250498.9	D5/D6	4	0.866972	-0.205959	0.272093	ENST00000250498.9 D5/D6	0.00461139	ENSG00000129562.11	DAD1	protein_coding	DAD1-201	protein_coding	684	3	2	High Confidence
ENST00000250498.9	F7/D6	4	0.771472	-0.37438	0.552535	ENST00000250498.9 F7/D6	0.00164656	ENSG00000129562.11	DAD1	protein_coding	DAD1-201	protein_coding	684	3	2	High Confidence
ENST00000250498.9	M8/D6	4	0.78224	-0.354366	0.478806	ENST00000250498.9 M8/D6	0.00879712	ENSG00000129562.11	DAD1	protein_coding	DAD1-201	protein_coding	684	3	2	High Confidence
ENST00000250559.14	D5/D6	3	0.85168	-0.23805	6.80529	ENST00000250559.14 D5/D6	0.0572494	ENSG00000127314.18	RAP1B	protein_coding	RAP1B-201	protein_coding	13378	8	7	Low Confidence
ENST00000250617.7	D5/D6	3	0.71453	-0.487645	4.2704	ENST00000250617.7 D5/D6	0.0350591	ENSG00000129675.16	ARHGEF6	protein_coding	ARHGEF6-201	protein_coding	4860	22	21	Low Confidence
ENST00000250916.6	D5/D6	2	2.12361	1.08652	0.144625	ENST00000250916.6 D5/D6	0.00442563	ENSG00000129911.9	KLF16	protein_coding	KLF16-201	protein_coding	2901	2	1	Low Confidence
ENST00000250916.6	M8/D6	2	1.29263	0.370279	0.594061	ENST00000250916.6 M8/D6	0.100098	ENSG00000129911.9	KLF16	protein_coding	KLF16-201	protein_coding	2901	2	1	Low Confidence
ENST00000251047.6	M8/D6	3	0.753975	-0.407496	0.771329	ENST00000251047.6 M8/D6	0.00304837	ENSG00000074695.6	LMAN1	protein_coding	LMAN1-201	protein_coding	4824	13	12	High Confidence
ENST00000251108.10	D5/D6	3	0.733123	-0.449195	3.05214	ENST00000251108.10 D5/D6	0.136888	ENSG00000102543.14	CDADC1	protein_coding	CDADC1-201	protein_coding	3386	10	9	Medium Confidence
ENST00000251376.7	F7/D6	2	0.410985	-1.28289	0.800392	ENST00000251376.7 F7/D6	0.00786524	ENSG00000239998.7	LILRA2	protein_coding	LILRA2-201	protein_coding	4429	7	6	Low Confidence
ENST00000251376.7	M8/D6	2	2.47043	1.30434	2.41843	ENST00000251376.7 M8/D6	0.00124745	ENSG00000239998.7	LILRA2	protein_coding	LILRA2-201	protein_coding	4429	7	6	Medium Confidence
ENST00000251412.8	D5/D6	3	0.652675	-0.61939	5.05663	ENST00000251412.8 D5/D6	0.0158503	ENSG00000037042.9	TUBG2	protein_coding	TUBG2-201	protein_coding	1782	11	10	Low Confidence
ENST00000251453.8	D5/D6	3	1.34413	0.426391	1.38916	ENST00000251453.8 D5/D6	0.000155835	ENSG00000105193.9	RPS16	protein_coding	RPS16-201	protein_coding	631	5	4	High Confidence
ENST00000251453.8	F7/D6	3	1.1495	0.200959	0.538542	ENST00000251453.8 F7/D6	0.0107616	ENSG00000105193.9	RPS16	protein_coding	RPS16-201	protein_coding	631	5	4	High Confidence
ENST00000251453.8	M8/D6	2	0.74875	-0.417457	0.420154	ENST00000251453.8 M8/D6	9.34365e-05	ENSG00000105193.9	RPS16	protein_coding	RPS16-201	protein_coding	631	5	4	Low Confidence
ENST00000251496.7	D5/D6	2	0.602425	-0.731271	1.31664	ENST00000251496.7 D5/D6	0.0414835	ENSG00000109805.10	NCAPG	protein_coding	NCAPG-201	protein_coding	4587	21	20	Low Confidence
ENST00000251496.7	M8/D6	2	2.16864	1.11644	2.21143	ENST00000251496.7 M8/D6	0.00279363	ENSG00000109805.10	NCAPG	protein_coding	NCAPG-201	protein_coding	4587	21	20	Medium Confidence
ENST00000251507.8	D5/D6	2	1.19214	0.250498	6.49523	ENST00000251507.8 D5/D6	0.188074	ENSG00000152061.24	RABGAP1L	protein_coding	RABGAP1L-201	protein_coding	2899	21	20	Low Confidence
ENST00000251607.11	F7/D6	3	0.743196	-0.432752	5.71983	ENST00000251607.11 F7/D6	0.00802256	ENSG00000072756.18	TRNT1	protein_coding	TRNT1-201	protein_coding	2252	8	7	Low Confidence
ENST00000251607.11	M8/D6	3	0.741082	-0.432703	1.68883	ENST00000251607.11 M8/D6	0.028218	ENSG00000072756.18	TRNT1	protein_coding	TRNT1-201	protein_coding	2252	8	7	High Confidence
ENST00000251636.10	M8/D6	2	0.816428	-0.292654	0.843143	ENST00000251636.10 M8/D6	0.0566593	ENSG00000067248.11	DHX29	protein_coding	DHX29-201	protein_coding	4664	27	26	Low Confidence
ENST00000251642.8	F7/D6	2	1.19217	0.25334	1.86375	ENST00000251642.8 F7/D6	0.220783	ENSG00000108771.13	DHX58	protein_coding	DHX58-201	protein_coding	2591	14	13	Medium Confidence
ENST00000251775.9	D5/D6	4	1.15278	0.205081	0.413126	ENST00000251775.9 D5/D6	0.114554	ENSG00000114520.11	SNX4	protein_coding	SNX4-201	protein_coding	2512	14	13	High Confidence
ENST00000251822.7	M8/D6	3	2.13051	1.08197	8.04663	ENST00000251822.7 M8/D6	0.00386518	ENSG00000008853.18	RHOBTB2	protein_coding	RHOBTB2-201	protein_coding	5482	10	9	Low Confidence
ENST00000252032.10	D5/D6	2	2.37824	1.24989	0.0833042	ENST00000252032.10 D5/D6	0.0302591	ENSG00000088854.13	DNAAF9	protein_coding	DNAAF9-201	protein_coding	6912	37	36	Low Confidence
ENST00000252085.4	M8/D6	2	2.59664	1.34495	20.7324	ENST00000252085.4 M8/D6	0.0114542	ENSG00000253159.3	PCDHGA12	protein_coding	PCDHGA12-201	protein_coding	4854	4	3	Low Confidence
ENST00000252102.9	D5/D6	2	0.73587	-0.442525	0.806816	ENST00000252102.9 D5/D6	0.0108858	ENSG00000131495.9	NDUFA2	protein_coding	NDUFA2-201	protein_coding	649	3	2	Low Confidence
ENST00000252115.10	F7/D6	2	0.887347	-0.172463	0.674108	ENST00000252115.10 F7/D6	0.0734265	ENSG00000100227.19	POLDIP3	protein_coding	POLDIP3-201	protein_coding	3362	9	8	Low Confidence
ENST00000252506.11	D5/D6	4	0.303878	-1.72047	3.0699	ENST00000252506.11 D5/D6	0.0139977	ENSG00000130222.11	GADD45G	protein_coding	GADD45G-201	protein_coding	1066	4	3	Medium Confidence
ENST00000252506.11	F7/D6	3	2.35168	1.23277	2.55151	ENST00000252506.11 F7/D6	0.0120712	ENSG00000130222.11	GADD45G	protein_coding	GADD45G-201	protein_coding	1066	4	3	Medium Confidence
ENST00000252593.7	D5/D6	4	0.794415	-0.332058	0.32819	ENST00000252593.7 D5/D6	0.000582108	ENSG00000130303.14	BST2	protein_coding	BST2-201	protein_coding	1001	5	4	High Confidence
ENST00000252593.7	M8/D6	3	0.907523	-0.140896	2.52032	ENST00000252593.7 M8/D6	0.0170541	ENSG00000130303.14	BST2	protein_coding	BST2-201	protein_coding	1001	5	4	Medium Confidence
ENST00000252603.7	D5/D6	3	1.28243	0.358079	2.33178	ENST00000252603.7 D5/D6	0.0124988	ENSG00000130313.7	PGLS	protein_coding	PGLS-201	protein_coding	1008	5	4	Medium Confidence
ENST00000252622.15	D5/D6	2	1.27367	0.348869	1.28185	ENST00000252622.15 D5/D6	0.0166078	ENSG00000130332.15	LSM7	protein_coding	LSM7-201	protein_coding	491	4	3	Low Confidence
ENST00000252699.7	M8/D6	2	1.32587	0.406705	1.82127	ENST00000252699.7 M8/D6	0.00478819	ENSG00000130402.14	ACTN4	protein_coding	ACTN4-201	protein_coding	4990	21	20	Medium Confidence
ENST00000252809.3	D5/D6	4	0.416531	-1.26472	2.39344	ENST00000252809.3 D5/D6	6.05084e-05	ENSG00000130513.7	GDF15	protein_coding	GDF15-201	protein_coding	1200	2	1	Medium Confidence
ENST00000252809.3	F7/D6	3	0.816847	-0.291952	0.78798	ENST00000252809.3 F7/D6	0.0447641	ENSG00000130513.7	GDF15	protein_coding	GDF15-201	protein_coding	1200	2	1	High Confidence
ENST00000252809.3	M8/D6	4	0.417051	-1.26252	1.95936	ENST00000252809.3 M8/D6	2.35974e-05	ENSG00000130513.7	GDF15	protein_coding	GDF15-201	protein_coding	1200	2	1	Medium Confidence
ENST00000252996.9	D5/D6	2	1.42935	0.514431	3.5779	ENST00000252996.9 D5/D6	0.0331204	ENSG00000130699.20	TAF4	protein_coding	TAF4-201	protein_coding	4699	15	14	Medium Confidence
ENST00000253024.10	D5/D6	2	1.33085	0.407465	8.21591	ENST00000253024.10 D5/D6	0.101979	ENSG00000130726.12	TRIM28	protein_coding	TRIM28-201	protein_coding	3364	17	16	Low Confidence
ENST00000253031.6	D5/D6	3	0.633157	-0.671119	9.12079	ENST00000253031.6 D5/D6	0.0498898	ENSG00000130733.11	YIPF2	protein_coding	YIPF2-201	protein_coding	2087	10	9	Low Confidence
ENST00000253039.9	D5/D6	4	1.30608	0.384938	1.18618	ENST00000253039.9 D5/D6	0.00193052	ENSG00000130741.11	EIF2S3	protein_coding	EIF2S3-201	protein_coding	3457	12	11	High Confidence
ENST00000253039.9	M8/D6	2	1.18	0.23798	3.35392	ENST00000253039.9 M8/D6	0.125629	ENSG00000130741.11	EIF2S3	protein_coding	EIF2S3-201	protein_coding	3457	12	11	Medium Confidence
ENST00000253063.4	M8/D6	3	0.811013	-0.3023	0.819238	ENST00000253063.4 M8/D6	0.00515086	ENSG00000130766.5	SESN2	protein_coding	SESN2-201	protein_coding	3462	10	9	High Confidence
ENST00000253083.9	M8/D6	3	1.89397	0.919361	3.73748	ENST00000253083.9 M8/D6	0.0112632	ENSG00000130787.14	HIP1R	protein_coding	HIP1R-201	protein_coding	4509	32	31	Low Confidence
ENST00000253099.11	D5/D6	3	1.41987	0.503949	3.49504	ENST00000253099.11 D5/D6	0.00362302	ENSG00000105364.14	MRPL4	protein_coding	MRPL4-201	protein_coding	1218	9	8	Medium Confidence
ENST00000253107.12	D5/D6	2	1.39533	0.474404	9.25196	ENST00000253107.12 D5/D6	0.213746	ENSG00000130810.20	PPAN	protein_coding	PPAN-201	protein_coding	2302	12	11	Low Confidence
ENST00000253110.16	D5/D6	3	0.829804	-0.269187	0.459265	ENST00000253110.16 D5/D6	0.0331509	ENSG00000130813.18	SHFL	protein_coding	SHFL-201	protein_coding	1928	8	7	High Confidence
ENST00000253237.10	D5/D6	2	1.16481	0.219963	1.3581	ENST00000253237.10 D5/D6	0.0382873	ENSG00000105447.13	GRWD1	protein_coding	GRWD1-201	protein_coding	5361	7	6	Low Confidence
ENST00000253247.9	D5/D6	3	1.2443	0.314372	2.56715	ENST00000253247.9 D5/D6	0.0146917	ENSG00000130935.10	NOL11	protein_coding	NOL11-201	protein_coding	2844	18	17	Medium Confidence
ENST00000253270.13	F7/D6	3	0.723848	-0.480171	10.0853	ENST00000253270.13 F7/D6	0.021752	ENSG00000130958.13	SLC35D2	protein_coding	SLC35D2-201	protein_coding	1623	12	11	Low Confidence
ENST00000253452.8	D5/D6	2	1.23331	0.302037	2.62823	ENST00000253452.8 D5/D6	0.0108978	ENSG00000131143.10	COX4I1	protein_coding	COX4I1-201	protein_coding	763	5	4	Medium Confidence
ENST00000253452.8	F7/D6	2	1.11333	0.15488	0.0128591	ENST00000253452.8 F7/D6	0.0717576	ENSG00000131143.10	COX4I1	protein_coding	COX4I1-201	protein_coding	763	5	4	Low Confidence
ENST00000253462.8	D5/D6	4	1.62344	0.698551	1.52977	ENST00000253462.8 D5/D6	0.0009604	ENSG00000131153.9	GINS2	protein_coding	GINS2-201	protein_coding	2628	5	4	High Confidence
ENST00000253577.9	M8/D6	2	1.71305	0.770489	9.16345	ENST00000253577.9 M8/D6	0.00804219	ENSG00000131269.19	ABCB7	protein_coding	ABCB7-201	protein_coding	4595	16	15	Low Confidence
ENST00000253686.7	D5/D6	2	1.29609	0.373682	2.60317	ENST00000253686.7 D5/D6	0.0326222	ENSG00000131368.9	MRPS25	protein_coding	MRPS25-201	protein_coding	4572	4	3	Medium Confidence
ENST00000253719.7	M8/D6	2	0.501879	-1.00853	13.8337	ENST00000253719.7 M8/D6	0.020173	ENSG00000131400.9	NAPSA	protein_coding	NAPSA-201	protein_coding	1357	9	8	Low Confidence
ENST00000253788.12	D5/D6	4	1.26809	0.342499	0.865569	ENST00000253788.12 D5/D6	0.00063777	ENSG00000131469.15	RPL27	protein_coding	RPL27-201	protein_coding	505	5	4	High Confidence
ENST00000253788.12	F7/D6	4	1.12479	0.16953	0.765031	ENST00000253788.12 F7/D6	0.010341	ENSG00000131469.15	RPL27	protein_coding	RPL27-201	protein_coding	505	5	4	High Confidence
ENST00000253794.7	D5/D6	3	0.966935	-0.0485213	0.288538	ENST00000253794.7 D5/D6	0.0823408	ENSG00000131475.7	VPS25	protein_coding	VPS25-201	protein_coding	1088	6	5	High Confidence
ENST00000253814.6	F7/D6	4	0.672681	-0.572774	1.88996	ENST00000253814.6 F7/D6	0.0212198	ENSG00000131507.11	NDFIP1	protein_coding	NDFIP1-201	protein_coding	3574	8	7	Medium Confidence
ENST00000253814.6	M8/D6	2	0.847519	-0.238685	0.180599	ENST00000253814.6 M8/D6	0.253591	ENSG00000131507.11	NDFIP1	protein_coding	NDFIP1-201	protein_coding	3574	8	7	Low Confidence
ENST00000254101.4	F7/D6	3	1.33991	0.421461	2.14302	ENST00000254101.4 F7/D6	0.0395236	ENSG00000131791.8	PRKAB2	protein_coding	PRKAB2-201	protein_coding	5343	8	7	Medium Confidence
ENST00000254190.4	F7/D6	2	0.710449	-0.493201	0.258301	ENST00000254190.4 F7/D6	0.150875	ENSG00000131873.7	CHSY1	protein_coding	CHSY1-201	protein_coding	4662	3	2	Low Confidence
ENST00000254193.11	D5/D6	3	0.704033	-0.506499	1.2126	ENST00000254193.11 D5/D6	0.000433576	ENSG00000131876.18	SNRPA1	protein_coding	SNRPA1-201	protein_coding	1052	9	8	High Confidence
ENST00000254193.11	F7/D6	3	0.810615	-0.302955	0.548628	ENST00000254193.11 F7/D6	0.0264147	ENSG00000131876.18	SNRPA1	protein_coding	SNRPA1-201	protein_coding	1052	9	8	High Confidence
ENST00000254301.14	M8/D6	3	0.660986	-0.597316	0.218824	ENST00000254301.14 M8/D6	0.000237256	ENSG00000131981.16	LGALS3	protein_coding	LGALS3-201	protein_coding	958	6	5	High Confidence
ENST00000254322.3	D5/D6	4	0.147996	-2.75757	2.32467	ENST00000254322.3 D5/D6	2.21559e-08	ENSG00000132002.9	DNAJB1	protein_coding	DNAJB1-201	protein_coding	2242	3	2	Medium Confidence
ENST00000254322.3	F7/D6	4	0.732229	-0.449664	0.37734	ENST00000254322.3 F7/D6	0.000955548	ENSG00000132002.9	DNAJB1	protein_coding	DNAJB1-201	protein_coding	2242	3	2	High Confidence
ENST00000254322.3	M8/D6	4	0.255191	-1.9705	0.838274	ENST00000254322.3 M8/D6	9.25392e-08	ENSG00000132002.9	DNAJB1	protein_coding	DNAJB1-201	protein_coding	2242	3	2	High Confidence
ENST00000254436.8	F7/D6	3	0.842292	-0.247726	0.90252	ENST00000254436.8 F7/D6	0.0406791	ENSG00000132109.10	TRIM21	protein_coding	TRIM21-201	protein_coding	1935	7	6	High Confidence
ENST00000254480.10	D5/D6	3	1.36644	0.450391	0.448287	ENST00000254480.10 D5/D6	0.00260883	ENSG00000173473.11	SMARCC1	protein_coding	SMARCC1-201	protein_coding	6354	28	27	High Confidence
ENST00000254508.7	D5/D6	3	1.4866	0.571042	2.62665	ENST00000254508.7 D5/D6	0.00228241	ENSG00000132182.13	NUP210	protein_coding	NUP210-201	protein_coding	7206	40	39	Medium Confidence
ENST00000254508.7	M8/D6	2	0.832843	-0.264264	2.2977	ENST00000254508.7 M8/D6	0.150221	ENSG00000132182.13	NUP210	protein_coding	NUP210-201	protein_coding	7206	40	39	Medium Confidence
ENST00000254521.8	M8/D6	3	1.23369	0.302735	1.30369	ENST00000254521.8 M8/D6	0.0493583	ENSG00000132196.16	HSD17B7	protein_coding	HSD17B7-201	protein_coding	1528	9	8	High Confidence
ENST00000254528.4	F7/D6	3	1.68742	0.754225	2.03143	ENST00000254528.4 F7/D6	0.0487174	ENSG00000132205.11	EMILIN2	protein_coding	EMILIN2-201	protein_coding	5944	8	7	Medium Confidence
ENST00000254630.12	D5/D6	3	1.28279	0.358991	1.42749	ENST00000254630.12 D5/D6	0.0206132	ENSG00000132300.19	PTCD3	protein_coding	PTCD3-201	protein_coding	6681	24	23	High Confidence
ENST00000254654.8	D5/D6	2	1.15139	0.203137	1.8175	ENST00000254654.8 D5/D6	0.176412	ENSG00000132323.9	ILKAP	protein_coding	ILKAP-201	protein_coding	1455	12	11	Medium Confidence
ENST00000254718.9	D5/D6	2	1.35785	0.440727	2.87469	ENST00000254718.9 D5/D6	0.0233069	ENSG00000132382.15	MYBBP1A	protein_coding	MYBBP1A-201	protein_coding	4558	26	25	Medium Confidence
ENST00000254719.10	F7/D6	2	0.766846	-0.382999	0.333307	ENST00000254719.10 F7/D6	0.0178969	ENSG00000132383.12	RPA1	protein_coding	RPA1-201	protein_coding	4847	17	16	Low Confidence
ENST00000254799.11	M8/D6	2	0.777415	-0.363931	3.08747	ENST00000254799.11 M8/D6	0.0260151	ENSG00000132463.15	GRSF1	protein_coding	GRSF1-201	protein_coding	6610	10	9	Medium Confidence
ENST00000254801.9	D5/D6	4	0.285075	-1.81073	0.827284	ENST00000254801.9 D5/D6	3.67669e-07	ENSG00000132465.12	JCHAIN	protein_coding	JCHAIN-201	protein_coding	1286	4	3	High Confidence
ENST00000254801.9	M8/D6	4	0.32643	-1.61543	1.12427	ENST00000254801.9 M8/D6	2.57689e-07	ENSG00000132465.12	JCHAIN	protein_coding	JCHAIN-201	protein_coding	1286	4	3	High Confidence
ENST00000254803.4	M8/D6	3	0.809364	-0.305205	0.671025	ENST00000254803.4 M8/D6	0.0410049	ENSG00000132467.4	UTP3	protein_coding	UTP3-201	protein_coding	2020	1	0	High Confidence
ENST00000254806.8	D5/D6	3	0.81718	-0.291459	1.13662	ENST00000254806.8 D5/D6	0.0114593	ENSG00000132471.12	WBP2	protein_coding	WBP2-201	protein_coding	1859	8	7	High Confidence
ENST00000254810.8	D5/D6	3	0.945091	-0.0815145	0.524568	ENST00000254810.8 D5/D6	0.00443116	ENSG00000132475.10	H3-3B	protein_coding	H3-3B-201	protein_coding	2705	4	3	High Confidence
ENST00000254810.8	F7/D6	3	0.865237	-0.210245	3.15961	ENST00000254810.8 F7/D6	0.00267522	ENSG00000132475.10	H3-3B	protein_coding	H3-3B-201	protein_coding	2705	4	3	Medium Confidence
ENST00000254810.8	M8/D6	3	0.863784	-0.21452	4.82529	ENST00000254810.8 M8/D6	0.000953756	ENSG00000132475.10	H3-3B	protein_coding	H3-3B-201	protein_coding	2705	4	3	Low Confidence
ENST00000254821.10	D5/D6	2	1.21168	0.276441	2.79943	ENST00000254821.10 D5/D6	0.0381105	ENSG00000132485.14	ZRANB2	protein_coding	ZRANB2-201	protein_coding	2821	11	10	Medium Confidence
ENST00000254940.10	D5/D6	3	1.40764	0.491402	3.63582	ENST00000254940.10 D5/D6	0.0102428	ENSG00000132603.15	NIP7	protein_coding	NIP7-201	protein_coding	2055	5	4	Medium Confidence
ENST00000254942.8	F7/D6	2	0.82205	-0.283673	3.66854	ENST00000254942.8 F7/D6	0.0974638	ENSG00000132604.11	TERF2	protein_coding	TERF2-201	protein_coding	2996	10	9	Medium Confidence
ENST00000254998.3	D5/D6	3	1.38264	0.466769	2.11677	ENST00000254998.3 D5/D6	0.0006181	ENSG00000132661.4	NXT1	protein_coding	NXT1-201	protein_coding	1062	2	1	Medium Confidence
ENST00000255108.8	D5/D6	2	1.37416	0.458515	0.71875	ENST00000255108.8 D5/D6	0.0169319	ENSG00000132768.14	DPH2	protein_coding	DPH2-201	protein_coding	2466	6	5	Low Confidence
ENST00000255174.3	D5/D6	2	1.13146	0.178048	1.35598	ENST00000255174.3 D5/D6	0.165912	ENSG00000132823.11	OSER1	protein_coding	OSER1-201	protein_coding	2109	4	3	Low Confidence
ENST00000255198.3	M8/D6	2	1.2272	0.295149	1.74854	ENST00000255198.3 M8/D6	0.0346094	ENSG00000132846.6	ZBED3	protein_coding	ZBED3-201	protein_coding	6134	3	2	Low Confidence
ENST00000255390.10	D5/D6	3	1.23384	0.300835	3.95081	ENST00000255390.10 D5/D6	0.0122174	ENSG00000133028.12	SCO1	protein_coding	SCO1-201	protein_coding	9577	6	5	Low Confidence
ENST00000255409.8	F7/D6	4	2.85295	1.51012	3.25815	ENST00000255409.8 F7/D6	0.00548998	ENSG00000133048.13	CHI3L1	protein_coding	CHI3L1-201	protein_coding	1747	10	9	Medium Confidence
ENST00000255409.8	M8/D6	3	1.85868	0.893907	1.60157	ENST00000255409.8 M8/D6	0.0267887	ENSG00000133048.13	CHI3L1	protein_coding	CHI3L1-201	protein_coding	1747	10	9	High Confidence
ENST00000255559.8	M8/D6	2	0.585717	-0.775577	7.29828	ENST00000255559.8 M8/D6	0.0212156	ENSG00000133195.12	SLC39A11	protein_coding	SLC39A11-201	protein_coding	2732	10	9	Low Confidence
ENST00000255688.8	D5/D6	3	0.721253	-0.471693	1.36257	ENST00000255688.8 D5/D6	0.00783405	ENSG00000133321.11	PLAAT4	protein_coding	PLAAT4-201	protein_coding	758	4	3	High Confidence
ENST00000255688.8	F7/D6	3	0.801521	-0.319991	2.36492	ENST00000255688.8 F7/D6	0.0135818	ENSG00000133321.11	PLAAT4	protein_coding	PLAAT4-201	protein_coding	758	4	3	Medium Confidence
ENST00000255688.8	M8/D6	2	1.06396	0.0894438	0.23756	ENST00000255688.8 M8/D6	0.169654	ENSG00000133321.11	PLAAT4	protein_coding	PLAAT4-201	protein_coding	758	4	3	Low Confidence
ENST00000255695.2	D5/D6	4	2.34037	1.22639	1.24991	ENST00000255695.2 D5/D6	0.00173461	ENSG00000133328.4	PLAAT2	protein_coding	PLAAT2-201	protein_coding	738	4	3	High Confidence
ENST00000255695.2	F7/D6	3	0.5984	-0.74205	2.89351	ENST00000255695.2 F7/D6	0.0153937	ENSG00000133328.4	PLAAT2	protein_coding	PLAAT2-201	protein_coding	738	4	3	Medium Confidence
ENST00000255764.4	D5/D6	3	0.980285	-0.028736	0.248041	ENST00000255764.4 D5/D6	0.0534626	ENSG00000133398.4	MED10	protein_coding	MED10-201	protein_coding	1101	4	3	High Confidence
ENST00000255784.6	M8/D6	2	0.786955	-0.34601	2.2435	ENST00000255784.6 M8/D6	0.0999064	ENSG00000100147.14	CCDC134	protein_coding	CCDC134-201	protein_coding	7135	7	6	Medium Confidence
ENST00000255882.11	D5/D6	2	1.43689	0.522389	2.77536	ENST00000255882.11 D5/D6	0.0307162	ENSG00000241973.11	PI4KA	protein_coding	PI4KA-201	protein_coding	6751	55	54	Medium Confidence
ENST00000255977.7	D5/D6	2	0.867529	-0.205679	3.03064	ENST00000255977.7 D5/D6	0.178893	ENSG00000133606.11	MKRN1	protein_coding	MKRN1-201	protein_coding	3094	8	7	Medium Confidence
ENST00000256001.13	D5/D6	3	1.53387	0.616804	1.59897	ENST00000256001.13 D5/D6	0.0864671	ENSG00000133627.18	ACTR3B	protein_coding	ACTR3B-201	protein_coding	2213	12	11	High Confidence
ENST00000256001.13	M8/D6	3	1.60421	0.679147	4.31905	ENST00000256001.13 M8/D6	0.126631	ENSG00000133627.18	ACTR3B	protein_coding	ACTR3B-201	protein_coding	2213	12	11	Low Confidence
ENST00000256151.8	D5/D6	2	1.15546	0.208464	0.319939	ENST00000256151.8 D5/D6	0.0782007	ENSG00000133773.12	CCDC59	protein_coding	CCDC59-201	protein_coding	1585	4	3	Low Confidence
ENST00000256151.8	M8/D6	2	0.849351	-0.235567	0.0230037	ENST00000256151.8 M8/D6	0.0573921	ENSG00000133773.12	CCDC59	protein_coding	CCDC59-201	protein_coding	1585	4	3	Low Confidence
ENST00000256257.2	D5/D6	2	0.503317	-0.992825	5.7198	ENST00000256257.2 D5/D6	0.0530331	ENSG00000133874.2	RNF122	protein_coding	RNF122-201	protein_coding	1872	6	5	Low Confidence
ENST00000256319.7	D5/D6	2	0.811138	-0.30379	5.00607	ENST00000256319.7 D5/D6	0.0116029	ENSG00000133935.7	ERG28	protein_coding	ERG28-201	protein_coding	2320	5	4	Low Confidence
ENST00000256367.3	D5/D6	2	0.806956	-0.310904	4.50561	ENST00000256367.3 D5/D6	0.304617	ENSG00000133985.3	TTC9	protein_coding	TTC9-201	protein_coding	5094	3	2	Low Confidence
ENST00000256367.3	M8/D6	2	1.31477	0.39422	2.8544	ENST00000256367.3 M8/D6	0.0548733	ENSG00000133985.3	TTC9	protein_coding	TTC9-201	protein_coding	5094	3	2	Medium Confidence
ENST00000256383.11	D5/D6	2	1.18479	0.244632	0.197969	ENST00000256383.11 D5/D6	0.0097947	ENSG00000134001.15	EIF2S1	protein_coding	EIF2S1-201	protein_coding	4154	8	7	Low Confidence
ENST00000256383.11	M8/D6	3	0.898065	-0.158062	4.5882	ENST00000256383.11 M8/D6	0.00855083	ENSG00000134001.15	EIF2S1	protein_coding	EIF2S1-201	protein_coding	4154	8	7	Low Confidence
ENST00000256429.8	D5/D6	4	1.24879	0.312175	6.00723	ENST00000256429.8 D5/D6	0.0375014	ENSG00000134046.12	MBD2	protein_coding	MBD2-201	protein_coding	5064	7	6	Low Confidence
ENST00000256429.8	F7/D6	4	0.832001	-0.266477	2.28214	ENST00000256429.8 F7/D6	0.113315	ENSG00000134046.12	MBD2	protein_coding	MBD2-201	protein_coding	5064	7	6	Medium Confidence
ENST00000256433.6	D5/D6	2	0.882378	-0.180543	0.398149	ENST00000256433.6 D5/D6	0.0172733	ENSG00000134049.6	IER3IP1	protein_coding	IER3IP1-201	protein_coding	3679	3	2	Low Confidence
ENST00000256433.6	M8/D6	2	0.835404	-0.25951	0.874646	ENST00000256433.6 M8/D6	0.00936271	ENSG00000134049.6	IER3IP1	protein_coding	IER3IP1-201	protein_coding	3679	3	2	Low Confidence
ENST00000256442.10	D5/D6	3	0.728858	-0.456427	0.973415	ENST00000256442.10 D5/D6	0.038851	ENSG00000134057.15	CCNB1	protein_coding	CCNB1-201	protein_coding	2029	9	8	High Confidence
ENST00000256442.10	M8/D6	4	2.31078	1.20819	0.952468	ENST00000256442.10 M8/D6	7.34596e-05	ENSG00000134057.15	CCNB1	protein_coding	CCNB1-201	protein_coding	2029	9	8	High Confidence
ENST00000256447.5	D5/D6	2	0.232666	-2.1042	2.72147	ENST00000256447.5 D5/D6	7.50186e-06	ENSG00000134061.5	CD180	protein_coding	CD180-201	protein_coding	5388	3	2	Medium Confidence
ENST00000256447.5	F7/D6	3	0.401023	-1.31911	2.4641	ENST00000256447.5 F7/D6	0.00018582	ENSG00000134061.5	CD180	protein_coding	CD180-201	protein_coding	5388	3	2	Medium Confidence
ENST00000256495.4	D5/D6	2	0.622778	-0.683216	0.315796	ENST00000256495.4 D5/D6	0.000274689	ENSG00000134107.5	BHLHE40	protein_coding	BHLHE40-201	protein_coding	3152	5	4	Low Confidence
ENST00000256495.4	M8/D6	2	0.49709	-1.00843	0.453366	ENST00000256495.4 M8/D6	0.000252322	ENSG00000134107.5	BHLHE40	protein_coding	BHLHE40-201	protein_coding	3152	5	4	Low Confidence
ENST00000256496.8	D5/D6	4	1.37268	0.456961	0.368238	ENST00000256496.8 D5/D6	0.000906696	ENSG00000134108.14	ARL8B	protein_coding	ARL8B-201	protein_coding	2933	7	6	High Confidence
ENST00000256496.8	F7/D6	3	0.868213	-0.203879	0.0648021	ENST00000256496.8 F7/D6	0.101865	ENSG00000134108.14	ARL8B	protein_coding	ARL8B-201	protein_coding	2933	7	6	High Confidence
ENST00000256496.8	M8/D6	4	0.840478	-0.250974	1.08209	ENST00000256496.8 M8/D6	0.0138766	ENSG00000134108.14	ARL8B	protein_coding	ARL8B-201	protein_coding	2933	7	6	High Confidence
ENST00000256509.7	F7/D6	2	0.191918	-2.38802	9.53308	ENST00000256509.7 F7/D6	0.00107472	ENSG00000134121.10	CHL1	protein_coding	CHL1-201	protein_coding	7856	28	27	Low Confidence
ENST00000256509.7	M8/D6	2	2.05269	1.03588	4.77119	ENST00000256509.7 M8/D6	0.00915557	ENSG00000134121.10	CHL1	protein_coding	CHL1-201	protein_coding	7856	28	27	Low Confidence
ENST00000256538.9	D5/D6	3	1.16322	0.218052	0.722996	ENST00000256538.9 D5/D6	0.0309839	ENSG00000134146.12	DPH6	protein_coding	DPH6-201	protein_coding	2098	9	8	High Confidence
ENST00000256545.9	D5/D6	3	0.871347	-0.198691	0.258431	ENST00000256545.9 D5/D6	0.027409	ENSG00000134153.10	EMC7	protein_coding	EMC7-201	protein_coding	1069	5	4	High Confidence
ENST00000256594.7	F7/D6	2	1.54062	0.623192	2.10878	ENST00000256594.7 F7/D6	0.0206197	ENSG00000134202.12	GSTM3	protein_coding	GSTM3-201	protein_coding	4046	8	7	Medium Confidence
ENST00000256594.7	M8/D6	2	2.60023	1.37732	4.27471	ENST00000256594.7 M8/D6	0.00041887	ENSG00000134202.12	GSTM3	protein_coding	GSTM3-201	protein_coding	4046	8	7	Low Confidence
ENST00000256646.7	D5/D6	2	1.32181	0.401618	3.53418	ENST00000256646.7 D5/D6	0.0548356	ENSG00000134250.21	NOTCH2	protein_coding	NOTCH2-201	protein_coding	11425	34	33	Medium Confidence
ENST00000256646.7	F7/D6	2	0.399188	-1.32505	1.62987	ENST00000256646.7 F7/D6	0.0029607	ENSG00000134250.21	NOTCH2	protein_coding	NOTCH2-201	protein_coding	11425	34	33	Low Confidence
ENST00000256646.7	M8/D6	2	0.280391	-1.83842	7.3747	ENST00000256646.7 M8/D6	0.000716792	ENSG00000134250.21	NOTCH2	protein_coding	NOTCH2-201	protein_coding	11425	34	33	Low Confidence
ENST00000256686.10	F7/D6	2	1.40504	0.490594	0.502354	ENST00000256686.10 F7/D6	0.0178038	ENSG00000134291.12	TMEM106C	protein_coding	TMEM106C-201	protein_coding	1394	8	7	Low Confidence
ENST00000256689.10	D5/D6	2	1.14888	0.200186	0.740985	ENST00000256689.10 D5/D6	0.0672189	ENSG00000134294.14	SLC38A2	protein_coding	SLC38A2-201	protein_coding	4795	16	15	Low Confidence
ENST00000256689.10	F7/D6	3	0.802813	-0.316925	0.650424	ENST00000256689.10 F7/D6	0.002771	ENSG00000134294.14	SLC38A2	protein_coding	SLC38A2-201	protein_coding	4795	16	15	High Confidence
ENST00000256720.6	D5/D6	2	0.669199	-0.579493	0.143917	ENST00000256720.6 D5/D6	0.0200895	ENSG00000134324.12	LPIN1	protein_coding	LPIN1-201	protein_coding	5384	20	19	Low Confidence
ENST00000256722.10	F7/D6	2	0.725677	-0.462832	1.78905	ENST00000256722.10 F7/D6	0.0405872	ENSG00000134326.12	CMPK2	protein_coding	CMPK2-201	protein_coding	3095	5	4	Low Confidence
ENST00000256722.10	M8/D6	3	1.50723	0.590794	2.74433	ENST00000256722.10 M8/D6	0.0228223	ENSG00000134326.12	CMPK2	protein_coding	CMPK2-201	protein_coding	3095	5	4	Medium Confidence
ENST00000256854.10	D5/D6	4	1.12174	0.16542	1.20378	ENST00000256854.10 D5/D6	0.0106403	ENSG00000134440.12	NARS1	protein_coding	NARS1-201	protein_coding	2762	14	13	High Confidence
ENST00000256925.12	D5/D6	3	1.6273	0.69874	5.00557	ENST00000256925.12 D5/D6	0.0100064	ENSG00000134508.13	CABLES1	protein_coding	CABLES1-201	protein_coding	5283	10	9	Low Confidence
ENST00000256925.12	F7/D6	3	0.785091	-0.350303	2.93009	ENST00000256925.12 F7/D6	0.0899795	ENSG00000134508.13	CABLES1	protein_coding	CABLES1-201	protein_coding	5283	10	9	Medium Confidence
ENST00000256925.12	M8/D6	3	1.53339	0.615235	3.19294	ENST00000256925.12 M8/D6	0.0325658	ENSG00000134508.13	CABLES1	protein_coding	CABLES1-201	protein_coding	5283	10	9	Medium Confidence
ENST00000256969.7	D5/D6	3	0.289328	-1.79036	2.83519	ENST00000256969.7 D5/D6	2.79845e-05	ENSG00000134548.11	SPX	protein_coding	SPX-201	protein_coding	2280	6	5	Medium Confidence
ENST00000256996.9	D5/D6	4	0.663076	-0.593002	1.07172	ENST00000256996.9 D5/D6	0.00127257	ENSG00000134574.12	DDB2	protein_coding	DDB2-201	protein_coding	1815	10	9	High Confidence
ENST00000256996.9	M8/D6	4	1.64273	0.715337	1.89234	ENST00000256996.9 M8/D6	0.000236727	ENSG00000134574.12	DDB2	protein_coding	DDB2-201	protein_coding	1815	10	9	Medium Confidence
ENST00000257013.9	D5/D6	2	0.891649	-0.165813	2.23778	ENST00000257013.9 D5/D6	0.0412994	ENSG00000134590.14	RTL8C	protein_coding	RTL8C-201	protein_coding	1192	1	0	Medium Confidence
ENST00000257013.9	M8/D6	2	0.819812	-0.286733	1.16747	ENST00000257013.9 M8/D6	0.0757125	ENSG00000134590.14	RTL8C	protein_coding	RTL8C-201	protein_coding	1192	1	0	Low Confidence
ENST00000257177.9	M8/D6	2	0.937162	-0.0944447	3.36115	ENST00000257177.9 M8/D6	0.271165	ENSG00000134744.14	TUT4	protein_coding	TUT4-201	protein_coding	5853	30	29	Medium Confidence
ENST00000257181.10	F7/D6	2	0.91078	-0.135174	2.19635	ENST00000257181.10 F7/D6	0.165468	ENSG00000134748.13	PRPF38A	protein_coding	PRPF38A-201	protein_coding	5233	10	9	Medium Confidence
ENST00000257287.5	D5/D6	3	0.518316	-0.96224	9.63249	ENST00000257287.5 D5/D6	0.0459035	ENSG00000174799.12	CEP135	protein_coding	CEP135-201	protein_coding	5596	26	25	Low Confidence
ENST00000257336.6	F7/D6	3	1.43552	0.517854	5.13116	ENST00000257336.6 F7/D6	0.0604404	ENSG00000134897.14	BIVM	protein_coding	BIVM-201	protein_coding	3789	11	10	Low Confidence
ENST00000257347.9	D5/D6	3	1.70055	0.765912	0.800595	ENST00000257347.9 D5/D6	0.00266567	ENSG00000134905.17	CARS2	protein_coding	CARS2-201	protein_coding	1838	15	14	High Confidence
ENST00000257347.9	F7/D6	3	0.746787	-0.42253	3.02163	ENST00000257347.9 F7/D6	0.0840005	ENSG00000134905.17	CARS2	protein_coding	CARS2-201	protein_coding	1838	15	14	Medium Confidence
ENST00000257347.9	M8/D6	3	0.622435	-0.685045	2.66008	ENST00000257347.9 M8/D6	0.00196738	ENSG00000134905.17	CARS2	protein_coding	CARS2-201	protein_coding	1838	15	14	Medium Confidence
ENST00000257435.12	D5/D6	3	0.314021	-1.68818	11.1172	ENST00000257435.12 D5/D6	0.000146657	ENSG00000134986.14	NREP	protein_coding	NREP-201	protein_coding	1942	4	3	Low Confidence
ENST00000257435.12	F7/D6	3	0.676975	-0.566618	5.12047	ENST00000257435.12 F7/D6	0.0306038	ENSG00000134986.14	NREP	protein_coding	NREP-201	protein_coding	1942	4	3	Low Confidence
ENST00000257497.11	D5/D6	4	0.230418	-2.12058	3.61745	ENST00000257497.11 D5/D6	2.83028e-05	ENSG00000135046.14	ANXA1	protein_coding	ANXA1-201	protein_coding	1401	13	12	Medium Confidence
ENST00000257497.11	F7/D6	3	1.38499	0.469602	1.36729	ENST00000257497.11 F7/D6	0.0210581	ENSG00000135046.14	ANXA1	protein_coding	ANXA1-201	protein_coding	1401	13	12	High Confidence
ENST00000257497.11	M8/D6	2	0.740817	-0.436703	7.33489	ENST00000257497.11 M8/D6	0.061726	ENSG00000135046.14	ANXA1	protein_coding	ANXA1-201	protein_coding	1401	13	12	Low Confidence
ENST00000257527.9	D5/D6	3	0.660782	-0.598722	2.61284	ENST00000257527.9 D5/D6	0.0151059	ENSG00000135074.16	ADAM19	protein_coding	ADAM19-201	protein_coding	6481	23	22	Medium Confidence
ENST00000257527.9	M8/D6	3	0.546152	-0.872684	0.639089	ENST00000257527.9 M8/D6	0.0141204	ENSG00000135074.16	ADAM19	protein_coding	ADAM19-201	protein_coding	6481	23	22	High Confidence
ENST00000257549.9	F7/D6	2	1.87297	0.904987	2.16831	ENST00000257549.9 F7/D6	0.0336819	ENSG00000135094.11	SDS	protein_coding	SDS-201	protein_coding	1605	8	7	Medium Confidence
ENST00000257570.10	D5/D6	2	1.13085	0.177412	0.0464881	ENST00000257570.10 D5/D6	0.286977	ENSG00000135114.14	OASL	protein_coding	OASL-201	protein_coding	3270	6	5	Low Confidence
ENST00000257570.10	M8/D6	2	1.21591	0.28194	1.18479	ENST00000257570.10 M8/D6	0.0314826	ENSG00000135114.14	OASL	protein_coding	OASL-201	protein_coding	3270	6	5	Low Confidence
ENST00000257572.5	D5/D6	2	12.9232	3.69108	3.34324	ENST00000257572.5 D5/D6	4.3385e-05	ENSG00000135116.9	HRK	protein_coding	HRK-201	protein_coding	5789	2	1	Medium Confidence
ENST00000257575.9	F7/D6	2	2.05274	1.03662	3.58868	ENST00000257575.9 F7/D6	0.00868912	ENSG00000135119.15	RNFT2	protein_coding	RNFT2-201	protein_coding	5727	11	10	Medium Confidence
ENST00000257604.9	D5/D6	4	0.578087	-0.792459	2.8772	ENST00000257604.9 D5/D6	0.00341047	ENSG00000135148.12	TRAFD1	protein_coding	TRAFD1-201	protein_coding	3178	12	11	Medium Confidence
ENST00000257604.9	F7/D6	3	0.662012	-0.59545	1.62322	ENST00000257604.9 F7/D6	0.042441	ENSG00000135148.12	TRAFD1	protein_coding	TRAFD1-201	protein_coding	3178	12	11	High Confidence
ENST00000257626.12	D5/D6	2	1.33672	0.418372	2.13356	ENST00000257626.12 D5/D6	0.0866287	ENSG00000186088.16	GSAP	protein_coding	GSAP-201	protein_coding	3200	31	30	Medium Confidence
ENST00000257626.12	F7/D6	2	0.715811	-0.482463	1.25848	ENST00000257626.12 F7/D6	0.135381	ENSG00000186088.16	GSAP	protein_coding	GSAP-201	protein_coding	3200	31	30	Low Confidence
ENST00000257637.8	D5/D6	2	0.908044	-0.139684	2.68053	ENST00000257637.8 D5/D6	0.00336944	ENSG00000135185.12	TMEM243	protein_coding	TMEM243-201	protein_coding	1062	4	3	Medium Confidence
ENST00000257637.8	F7/D6	2	0.818088	-0.289761	1.10499	ENST00000257637.8 F7/D6	0.0279456	ENSG00000135185.12	TMEM243	protein_coding	TMEM243-201	protein_coding	1062	4	3	Low Confidence
ENST00000257637.8	M8/D6	3	0.74555	-0.42434	2.21924	ENST00000257637.8 M8/D6	0.0210734	ENSG00000135185.12	TMEM243	protein_coding	TMEM243-201	protein_coding	1062	4	3	Medium Confidence
ENST00000257663.4	D5/D6	3	1.2472	0.318656	0.479063	ENST00000257663.4 D5/D6	0.0337279	ENSG00000135211.6	TMEM60	protein_coding	TMEM60-201	protein_coding	877	2	1	High Confidence
ENST00000257694.13	D5/D6	2	0.730598	-0.45293	1.05325	ENST00000257694.13 D5/D6	0.020869	ENSG00000135241.17	PNPLA8	protein_coding	PNPLA8-201	protein_coding	4569	11	10	Low Confidence
ENST00000257696.5	D5/D6	3	0.566118	-0.822105	3.00638	ENST00000257696.5 D5/D6	0.00222606	ENSG00000135245.10	HILPDA	protein_coding	HILPDA-201	protein_coding	1364	2	1	Medium Confidence
ENST00000257696.5	F7/D6	3	1.44941	0.535129	1.53871	ENST00000257696.5 F7/D6	0.0133533	ENSG00000135245.10	HILPDA	protein_coding	HILPDA-201	protein_coding	1364	2	1	High Confidence
ENST00000257787.6	D5/D6	4	1.36752	0.451503	0.53505	ENST00000257787.6 D5/D6	0.004724	ENSG00000135334.9	AKIRIN2	protein_coding	AKIRIN2-201	protein_coding	1898	5	4	High Confidence
ENST00000257787.6	F7/D6	4	0.844153	-0.244614	0.932561	ENST00000257787.6 F7/D6	0.0344773	ENSG00000135334.9	AKIRIN2	protein_coding	AKIRIN2-201	protein_coding	1898	5	4	High Confidence
ENST00000257787.6	M8/D6	2	1.18685	0.247133	0.134341	ENST00000257787.6 M8/D6	0.0678992	ENSG00000135334.9	AKIRIN2	protein_coding	AKIRIN2-201	protein_coding	1898	5	4	Low Confidence
ENST00000257818.3	D5/D6	2	0.324456	-1.62759	7.13484	ENST00000257818.3 D5/D6	0.0254038	ENSG00000135363.12	LMO2	protein_coding	LMO2-201	protein_coding	2081	6	5	Low Confidence
ENST00000257829.8	D5/D6	4	1.46486	0.550663	0.671553	ENST00000257829.8 D5/D6	0.00168391	ENSG00000135372.10	NAT10	protein_coding	NAT10-201	protein_coding	3973	29	28	High Confidence
ENST00000257836.4	D5/D6	2	0.517639	-0.951714	4.89836	ENST00000257836.4 D5/D6	0.0121965	ENSG00000135378.4	PRRG4	protein_coding	PRRG4-201	protein_coding	5543	6	5	Low Confidence
ENST00000257868.10	M8/D6	2	1.42982	0.515443	2.33008	ENST00000257868.10 M8/D6	0.0272293	ENSG00000135414.10	GDF11	protein_coding	GDF11-201	protein_coding	8801	3	2	Medium Confidence
ENST00000257904.11	D5/D6	3	1.57008	0.650753	0.782766	ENST00000257904.11 D5/D6	2.89452e-05	ENSG00000135446.17	CDK4	protein_coding	CDK4-201	protein_coding	1865	8	7	High Confidence
ENST00000257910.8	M8/D6	3	1.00852	0.00854147	5.00263	ENST00000257910.8 M8/D6	0.089578	ENSG00000135452.10	TSPAN31	protein_coding	TSPAN31-201	protein_coding	3678	6	5	Low Confidence
ENST00000257915.10	D5/D6	3	0.63904	-0.646747	2.25466	ENST00000257915.10 D5/D6	0.00522192	ENSG00000135457.11	TFCP2	protein_coding	TFCP2-201	protein_coding	3807	15	14	Medium Confidence
ENST00000257966.13	D5/D6	3	0.759083	-0.398731	2.68666	ENST00000257966.13 D5/D6	0.0201106	ENSG00000135506.17	OS9	protein_coding	OS9-201	protein_coding	2809	14	13	Medium Confidence
ENST00000258080.8	D5/D6	3	0.696753	-0.521699	1.70521	ENST00000258080.8 D5/D6	0.00613074	ENSG00000115317.13	HTRA2	protein_coding	HTRA2-201	protein_coding	1785	8	7	High Confidence
ENST00000258080.8	F7/D6	2	1.17969	0.238404	0.14598	ENST00000258080.8 F7/D6	0.0935976	ENSG00000115317.13	HTRA2	protein_coding	HTRA2-201	protein_coding	1785	8	7	Low Confidence
ENST00000258083.3	D5/D6	3	0.774724	-0.36834	0.812076	ENST00000258083.3 D5/D6	0.0537007	ENSG00000135617.4	PRADC1	protein_coding	PRADC1-201	protein_coding	1090	5	4	High Confidence
ENST00000258091.10	D5/D6	3	1.20617	0.270085	1.54351	ENST00000258091.10 D5/D6	0.00233054	ENSG00000135624.17	CCT7	protein_coding	CCT7-201	protein_coding	1847	12	11	High Confidence
ENST00000258105.8	D5/D6	2	0.718329	-0.47988	5.99381	ENST00000258105.8 D5/D6	0.000231336	ENSG00000204822.7	MRPL53	protein_coding	MRPL53-201	protein_coding	496	3	2	Low Confidence
ENST00000258149.11	D5/D6	3	0.809601	-0.304894	1.10593	ENST00000258149.11 D5/D6	0.00627337	ENSG00000135679.27	MDM2	protein_coding	MDM2-202	protein_coding	7490	11	10	High Confidence
ENST00000258149.11	M8/D6	2	1.13684	0.184661	2.27302	ENST00000258149.11 M8/D6	0.174143	ENSG00000135679.27	MDM2	protein_coding	MDM2-202	protein_coding	7490	11	10	Medium Confidence
ENST00000258169.9	D5/D6	3	1.33298	0.414579	0.716331	ENST00000258169.9 D5/D6	0.0377621	ENSG00000135698.10	MPHOSPH6	protein_coding	MPHOSPH6-201	protein_coding	1101	5	4	High Confidence
ENST00000258201.9	D5/D6	2	0.72801	-0.457981	0.39145	ENST00000258201.9 D5/D6	0.116697	ENSG00000135723.14	FHOD1	protein_coding	FHOD1-201	protein_coding	3813	22	21	Low Confidence
ENST00000258201.9	M8/D6	2	1.23046	0.298794	2.37327	ENST00000258201.9 M8/D6	0.148185	ENSG00000135723.14	FHOD1	protein_coding	FHOD1-201	protein_coding	3813	22	21	Medium Confidence
ENST00000258214.3	D5/D6	2	0.53619	-0.899193	0.333245	ENST00000258214.3 D5/D6	0.107975	ENSG00000135736.6	CCDC102A	protein_coding	CCDC102A-201	protein_coding	2432	9	8	Low Confidence
ENST00000258214.3	M8/D6	3	0.487867	-1.03855	4.63355	ENST00000258214.3 M8/D6	0.0405599	ENSG00000135736.6	CCDC102A	protein_coding	CCDC102A-201	protein_coding	2432	9	8	Low Confidence
ENST00000258362.7	M8/D6	3	1.85993	0.892297	4.51317	ENST00000258362.7 M8/D6	0.0170557	ENSG00000127838.15	PNKD	protein_coding	PNKD-202	protein_coding	2991	9	8	Low Confidence
ENST00000258381.11	F7/D6	2	0.606556	-0.738351	15.2892	ENST00000258381.11 F7/D6	0.022476	ENSG00000135899.20	SP110	protein_coding	SP110-201	protein_coding	6192	19	18	Low Confidence
ENST00000258382.10	D5/D6	3	1.24383	0.314708	0.755141	ENST00000258382.10 D5/D6	0.00149172	ENSG00000135899.20	SP110	protein_coding	SP110-202	protein_coding	1952	15	14	High Confidence
ENST00000258382.10	F7/D6	3	0.654795	-0.610894	0.255534	ENST00000258382.10 F7/D6	3.18956e-05	ENSG00000135899.20	SP110	protein_coding	SP110-202	protein_coding	1952	15	14	High Confidence
ENST00000258383.4	M8/D6	2	0.803879	-0.318484	6.99048	ENST00000258383.4 M8/D6	0.0267667	ENSG00000135900.4	MRPL44	protein_coding	MRPL44-201	protein_coding	1689	4	3	Low Confidence
ENST00000258400.4	D5/D6	3	0.18822	-2.41252	4.49628	ENST00000258400.4 D5/D6	1.43309e-05	ENSG00000135914.6	HTR2B	protein_coding	HTR2B-201	protein_coding	2170	4	3	Low Confidence
ENST00000258411.8	D5/D6	2	0.550961	-0.860832	3.44309	ENST00000258411.8 D5/D6	0.0262279	ENSG00000135925.9	WNT10A	protein_coding	WNT10A-201	protein_coding	2055	4	3	Medium Confidence
ENST00000258411.8	M8/D6	2	1.34702	0.42948	2.01891	ENST00000258411.8 M8/D6	0.294847	ENSG00000135925.9	WNT10A	protein_coding	WNT10A-201	protein_coding	2055	4	3	Medium Confidence
ENST00000258412.8	D5/D6	3	0.848719	-0.236894	1.31985	ENST00000258412.8 D5/D6	0.0328189	ENSG00000135926.15	TMBIM1	protein_coding	TMBIM1-201	protein_coding	2292	12	11	High Confidence
ENST00000258415.9	F7/D6	2	0.49511	-1.01418	0.1848	ENST00000258415.9 F7/D6	0.0172685	ENSG00000135929.9	CYP27A1	protein_coding	CYP27A1-201	protein_coding	1895	9	8	Low Confidence
ENST00000258415.9	M8/D6	3	2.01681	1.00658	6.27844	ENST00000258415.9 M8/D6	0.0105314	ENSG00000135929.9	CYP27A1	protein_coding	CYP27A1-201	protein_coding	1895	9	8	Low Confidence
ENST00000258418.10	F7/D6	3	0.747443	-0.420494	1.92773	ENST00000258418.10 F7/D6	0.0670084	ENSG00000135932.12	CAB39	protein_coding	CAB39-201	protein_coding	3829	9	8	Medium Confidence
ENST00000258424.3	D5/D6	2	0.80075	-0.320709	1.35635	ENST00000258424.3 D5/D6	0.00830468	ENSG00000135940.7	COX5B	protein_coding	COX5B-201	protein_coding	690	4	3	Low Confidence
ENST00000258424.3	M8/D6	2	0.843485	-0.245738	1.54463	ENST00000258424.3 M8/D6	0.0225428	ENSG00000135940.7	COX5B	protein_coding	COX5B-201	protein_coding	690	4	3	Low Confidence
ENST00000258428.8	D5/D6	2	1.16271	0.213241	7.67055	ENST00000258428.8 D5/D6	0.0497103	ENSG00000135945.10	REV1	protein_coding	REV1-201	protein_coding	4731	23	22	Low Confidence
ENST00000258484.11	D5/D6	3	1.57725	0.65331	5.28665	ENST00000258484.11 D5/D6	0.00514637	ENSG00000135999.12	EPC2	protein_coding	EPC2-201	protein_coding	3883	14	13	Low Confidence
ENST00000258484.11	F7/D6	3	0.751427	-0.414315	3.78517	ENST00000258484.11 F7/D6	0.131813	ENSG00000135999.12	EPC2	protein_coding	EPC2-201	protein_coding	3883	14	13	Low Confidence
ENST00000258494.14	F7/D6	2	1.5884	0.667456	1.2752	ENST00000258494.14 F7/D6	0.0239092	ENSG00000136010.14	ALDH1L2	protein_coding	ALDH1L2-201	protein_coding	7428	23	22	Low Confidence
ENST00000258526.9	D5/D6	2	0.662918	-0.59318	1.06696	ENST00000258526.9 D5/D6	0.0415938	ENSG00000136040.9	PLXNC1	protein_coding	PLXNC1-201	protein_coding	7492	31	30	Low Confidence
ENST00000258526.9	F7/D6	2	0.734975	-0.44481	2.82514	ENST00000258526.9 F7/D6	0.118612	ENSG00000136040.9	PLXNC1	protein_coding	PLXNC1-201	protein_coding	7492	31	30	Medium Confidence
ENST00000258534.13	F7/D6	4	0.788586	-0.344242	2.73886	ENST00000258534.13 F7/D6	0.00603194	ENSG00000136048.14	DRAM1	protein_coding	DRAM1-201	protein_coding	3279	7	6	Medium Confidence
ENST00000258534.13	M8/D6	4	0.604585	-0.726297	1.21051	ENST00000258534.13 M8/D6	0.000286092	ENSG00000136048.14	DRAM1	protein_coding	DRAM1-201	protein_coding	3279	7	6	High Confidence
ENST00000258538.8	D5/D6	2	0.68017	-0.556077	0.7792	ENST00000258538.8 D5/D6	0.128417	ENSG00000136052.10	SLC41A2	protein_coding	SLC41A2-201	protein_coding	5443	11	10	Low Confidence
ENST00000258607.10	M8/D6	2	1.53895	0.621902	0.809901	ENST00000258607.10 M8/D6	0.0483863	ENSG00000136108.15	CKAP2	protein_coding	CKAP2-201	protein_coding	3614	9	8	Low Confidence
ENST00000258711.7	D5/D6	2	0.568885	-0.81394	1.43308	ENST00000258711.7 D5/D6	0.000273215	ENSG00000136213.10	CHST12	protein_coding	CHST12-201	protein_coding	15979	2	1	Low Confidence
ENST00000258711.7	F7/D6	2	0.738163	-0.437992	0.221837	ENST00000258711.7 F7/D6	0.0134157	ENSG00000136213.10	CHST12	protein_coding	CHST12-201	protein_coding	15979	2	1	Low Confidence
ENST00000258733.9	D5/D6	3	8.60474	2.99334	25.1417	ENST00000258733.9 D5/D6	2.35138e-06	ENSG00000136235.17	GPNMB	protein_coding	GPNMB-201	protein_coding	2650	11	10	Low Confidence
ENST00000258739.9	M8/D6	3	0.873347	-0.195801	1.73105	ENST00000258739.9 M8/D6	0.0273843	ENSG00000136240.10	KDELR2	protein_coding	KDELR2-201	protein_coding	2786	5	4	High Confidence
ENST00000258742.10	D5/D6	4	1.41151	0.496813	1.39457	ENST00000258742.10 D5/D6	0.00254839	ENSG00000136243.18	NUP42	protein_coding	NUP42-201	protein_coding	1571	7	6	High Confidence
ENST00000258770.8	D5/D6	2	1.25823	0.331181	1.74675	ENST00000258770.8 D5/D6	0.0701072	ENSG00000136270.14	TBRG4	protein_coding	TBRG4-201	protein_coding	2226	11	10	Low Confidence
ENST00000258772.10	D5/D6	2	1.16411	0.219041	1.58855	ENST00000258772.10 D5/D6	0.0857298	ENSG00000136271.11	DDX56	protein_coding	DDX56-201	protein_coding	1855	14	13	Low Confidence
ENST00000258772.10	M8/D6	3	0.859307	-0.21878	0.425548	ENST00000258772.10 M8/D6	0.115888	ENSG00000136271.11	DDX56	protein_coding	DDX56-201	protein_coding	1855	14	13	High Confidence
ENST00000258781.11	D5/D6	2	0.726834	-0.460879	2.8299	ENST00000258781.11 D5/D6	0.0906192	ENSG00000136280.17	CCM2	protein_coding	CCM2-201	protein_coding	1864	10	9	Medium Confidence
ENST00000258781.11	F7/D6	2	0.684342	-0.547247	0.710233	ENST00000258781.11 F7/D6	0.087885	ENSG00000136280.17	CCM2	protein_coding	CCM2-201	protein_coding	1864	10	9	Low Confidence
ENST00000258781.11	M8/D6	3	0.763243	-0.389788	0.143603	ENST00000258781.11 M8/D6	0.0938353	ENSG00000136280.17	CCM2	protein_coding	CCM2-201	protein_coding	1864	10	9	High Confidence
ENST00000258787.12	D5/D6	4	0.499874	-1.00173	2.53854	ENST00000258787.12 D5/D6	0.00026595	ENSG00000136286.16	MYO1G	protein_coding	MYO1G-201	protein_coding	3188	22	21	Medium Confidence
ENST00000258874.4	M8/D6	2	0.548351	-0.867266	2.45822	ENST00000258874.4 M8/D6	0.000818064	ENSG00000136371.11	MTHFS	protein_coding	MTHFS-201	protein_coding	2301	3	2	Medium Confidence
ENST00000258886.13	D5/D6	2	1.10997	0.150481	0.751917	ENST00000258886.13 D5/D6	0.0638743	ENSG00000136381.13	IREB2	protein_coding	IREB2-201	protein_coding	6324	22	21	Low Confidence
ENST00000258962.5	D5/D6	3	1.34379	0.426302	0.212203	ENST00000258962.5 D5/D6	0.00139607	ENSG00000136450.13	SRSF1	protein_coding	SRSF1-201	protein_coding	5343	4	3	High Confidence
ENST00000259075.6	D5/D6	3	0.766876	-0.383033	0.821249	ENST00000259075.6 D5/D6	0.00465627	ENSG00000136560.14	TANK	protein_coding	TANK-201	protein_coding	2152	8	7	High Confidence
ENST00000259075.6	F7/D6	2	0.884436	-0.177285	1.26359	ENST00000259075.6 F7/D6	0.0921966	ENSG00000136560.14	TANK	protein_coding	TANK-201	protein_coding	2152	8	7	Low Confidence
ENST00000259089.9	D5/D6	4	1.33656	0.417751	1.9035	ENST00000259089.9 D5/D6	0.0315335	ENSG00000136573.15	BLK	protein_coding	BLK-201	protein_coding	2215	13	12	Medium Confidence
ENST00000259089.9	M8/D6	4	0.625482	-0.677278	1.21031	ENST00000259089.9 M8/D6	0.00398819	ENSG00000136573.15	BLK	protein_coding	BLK-201	protein_coding	2215	13	12	High Confidence
ENST00000259199.9	F7/D6	3	0.708249	-0.501111	4.80234	ENST00000259199.9 F7/D6	0.026604	ENSG00000136682.16	ZNG1B	protein_coding	ZNG1B-201	protein_coding	1827	15	14	Low Confidence
ENST00000259199.9	M8/D6	3	0.715198	-0.484994	3.09175	ENST00000259199.9 M8/D6	0.0126226	ENSG00000136682.16	ZNG1B	protein_coding	ZNG1B-201	protein_coding	1827	15	14	Medium Confidence
ENST00000259229.7	D5/D6	3	0.772079	-0.373346	1.06935	ENST00000259229.7 D5/D6	0.0566292	ENSG00000136710.10	CCDC115	protein_coding	CCDC115-201	protein_coding	1769	5	4	High Confidence
ENST00000259253.11	M8/D6	3	0.768546	-0.380192	1.66525	ENST00000259253.11 M8/D6	0.0239378	ENSG00000136731.13	UGGT1	protein_coding	UGGT1-201	protein_coding	10761	41	40	High Confidence
ENST00000259254.9	D5/D6	4	1.31794	0.397992	1.16374	ENST00000259254.9 D5/D6	0.00173638	ENSG00000136732.16	GYPC	protein_coding	GYPC-201	protein_coding	1018	4	3	High Confidence
ENST00000259365.9	D5/D6	2	0.560912	-0.834416	1.91005	ENST00000259365.9 D5/D6	0.000119297	ENSG00000136842.14	TMOD1	protein_coding	TMOD1-201	protein_coding	3311	10	9	Medium Confidence
ENST00000259365.9	F7/D6	2	1.58623	0.665188	2.40094	ENST00000259365.9 F7/D6	0.00255836	ENSG00000136842.14	TMOD1	protein_coding	TMOD1-201	protein_coding	3311	10	9	Medium Confidence
ENST00000259400.11	M8/D6	2	1.19336	0.255025	0.339995	ENST00000259400.11 M8/D6	0.0636017	ENSG00000136874.11	STX17	protein_coding	STX17-201	protein_coding	6885	8	7	Low Confidence
ENST00000259512.9	D5/D6	3	0.783833	-0.351806	1.70506	ENST00000259512.9 D5/D6	0.0100319	ENSG00000136986.10	DERL1	protein_coding	DERL1-201	protein_coding	3213	8	7	High Confidence
ENST00000259512.9	F7/D6	3	0.79395	-0.334472	3.28458	ENST00000259512.9 F7/D6	0.0247257	ENSG00000136986.10	DERL1	protein_coding	DERL1-201	protein_coding	3213	8	7	Medium Confidence
ENST00000259512.9	M8/D6	3	0.775059	-0.368853	2.89222	ENST00000259512.9 M8/D6	0.0235467	ENSG00000136986.10	DERL1	protein_coding	DERL1-201	protein_coding	3213	8	7	Medium Confidence
ENST00000259608.8	D5/D6	3	0.548728	-0.865884	0.574553	ENST00000259608.8 D5/D6	0.000218502	ENSG00000137078.10	SIT1	protein_coding	SIT1-201	protein_coding	1222	5	4	High Confidence
ENST00000259608.8	M8/D6	4	0.468588	-1.09419	1.65689	ENST00000259608.8 M8/D6	0.000229986	ENSG00000137078.10	SIT1	protein_coding	SIT1-201	protein_coding	1222	5	4	High Confidence
ENST00000259632.12	D5/D6	3	0.839213	-0.252896	0.170549	ENST00000259632.12 D5/D6	0.0970643	ENSG00000137100.16	DCTN3	protein_coding	DCTN3-201	protein_coding	828	7	6	High Confidence
ENST00000259632.12	F7/D6	3	1.1081	0.147907	1.13243	ENST00000259632.12 F7/D6	0.0580718	ENSG00000137100.16	DCTN3	protein_coding	DCTN3-201	protein_coding	828	7	6	High Confidence
ENST00000259633.9	D5/D6	3	0.495911	-1.02665	10.3624	ENST00000259633.9 D5/D6	0.00354542	ENSG00000137101.14	CD72	protein_coding	CD72-201	protein_coding	1531	9	8	Low Confidence
ENST00000259633.9	F7/D6	3	0.603485	-0.744476	10.5887	ENST00000259633.9 F7/D6	0.0400156	ENSG00000137101.14	CD72	protein_coding	CD72-201	protein_coding	1531	9	8	Low Confidence
ENST00000259633.9	M8/D6	3	2.51184	1.32554	4.67271	ENST00000259633.9 M8/D6	2.89869e-05	ENSG00000137101.14	CD72	protein_coding	CD72-201	protein_coding	1531	9	8	Low Confidence
ENST00000259667.6	D5/D6	3	0.764822	-0.387196	1.64136	ENST00000259667.6 D5/D6	0.0134132	ENSG00000137133.11	HINT2	protein_coding	HINT2-201	protein_coding	649	5	4	High Confidence
ENST00000259667.6	M8/D6	3	0.74446	-0.425912	1.10805	ENST00000259667.6 M8/D6	0.0162893	ENSG00000137133.11	HINT2	protein_coding	HINT2-201	protein_coding	649	5	4	High Confidence
ENST00000259727.5	F7/D6	3	0.76979	-0.377615	1.02991	ENST00000259727.5 F7/D6	0.349753	ENSG00000137198.10	GMPR	protein_coding	GMPR-201	protein_coding	1508	9	8	High Confidence
ENST00000259727.5	M8/D6	3	6.3997	2.67771	1.43971	ENST00000259727.5 M8/D6	4.15753e-06	ENSG00000137198.10	GMPR	protein_coding	GMPR-201	protein_coding	1508	9	8	High Confidence
ENST00000259818.8	D5/D6	2	1.45647	0.542337	1.41002	ENST00000259818.8 D5/D6	0.0408878	ENSG00000137285.11	TUBB2B	protein_coding	TUBB2B-201	protein_coding	1922	4	3	Low Confidence
ENST00000259818.8	F7/D6	3	2.74445	1.45535	2.86739	ENST00000259818.8 F7/D6	0.000185876	ENSG00000137285.11	TUBB2B	protein_coding	TUBB2B-201	protein_coding	1922	4	3	Medium Confidence
ENST00000259818.8	M8/D6	3	4.30676	2.09582	8.85558	ENST00000259818.8 M8/D6	6.77166e-06	ENSG00000137285.11	TUBB2B	protein_coding	TUBB2B-201	protein_coding	1922	4	3	Low Confidence
ENST00000259874.6	D5/D6	3	0.400893	-1.31948	2.31083	ENST00000259874.6 D5/D6	8.74238e-05	ENSG00000137331.12	IER3	protein_coding	IER3-201	protein_coding	1237	2	1	Medium Confidence
ENST00000259874.6	F7/D6	3	0.688952	-0.537673	1.01293	ENST00000259874.6 F7/D6	0.0308594	ENSG00000137331.12	IER3	protein_coding	IER3-201	protein_coding	1237	2	1	High Confidence
ENST00000259953.8	M8/D6	2	1.65148	0.723757	0.140143	ENST00000259953.8 M8/D6	0.0324577	ENSG00000137404.15	NRM	protein_coding	NRM-201	protein_coding	1755	5	4	Low Confidence
ENST00000260045.8	F7/D6	2	0.753216	-0.408965	1.17422	ENST00000260045.8 F7/D6	0.170112	ENSG00000137492.9	THAP12	protein_coding	THAP12-201	protein_coding	3490	5	4	Low Confidence
ENST00000260102.9	D5/D6	2	1.25385	0.325242	3.93481	ENST00000260102.9 D5/D6	0.012319	ENSG00000137547.9	MRPL15	protein_coding	MRPL15-201	protein_coding	1729	5	4	Low Confidence
ENST00000260118.7	D5/D6	3	0.713679	-0.486684	0.457415	ENST00000260118.7 D5/D6	0.039922	ENSG00000137563.13	GGH	protein_coding	GGH-201	protein_coding	1248	9	8	High Confidence
ENST00000260118.7	F7/D6	2	0.795741	-0.329674	0.788018	ENST00000260118.7 F7/D6	0.0445999	ENSG00000137563.13	GGH	protein_coding	GGH-201	protein_coding	1248	9	8	Low Confidence
ENST00000260129.6	D5/D6	2	1.12103	0.164702	1.28573	ENST00000260129.6 D5/D6	0.129054	ENSG00000137574.11	TGS1	protein_coding	TGS1-201	protein_coding	4477	13	12	Low Confidence
ENST00000260130.9	D5/D6	4	1.29303	0.370563	0.947082	ENST00000260130.9 D5/D6	0.0126879	ENSG00000137575.12	SDCBP	protein_coding	SDCBP-201	protein_coding	2073	9	8	High Confidence
ENST00000260130.9	M8/D6	4	1.32813	0.409363	0.417698	ENST00000260130.9 M8/D6	0.00955895	ENSG00000137575.12	SDCBP	protein_coding	SDCBP-201	protein_coding	2073	9	8	High Confidence
ENST00000260197.12	D5/D6	3	1.30358	0.382117	1.57747	ENST00000260197.12 D5/D6	0.00583124	ENSG00000137642.13	SORL1	protein_coding	SORL1-201	protein_coding	10863	48	47	High Confidence
ENST00000260197.12	M8/D6	3	1.29962	0.377919	1.0774	ENST00000260197.12 M8/D6	0.00168811	ENSG00000137642.13	SORL1	protein_coding	SORL1-201	protein_coding	10863	48	47	High Confidence
ENST00000260227.5	D5/D6	4	0.113208	-3.14336	1.38897	ENST00000260227.5 D5/D6	7.83363e-05	ENSG00000137673.9	MMP7	protein_coding	MMP7-201	protein_coding	1119	6	5	High Confidence
ENST00000260227.5	M8/D6	3	1.78298	0.834172	0.906819	ENST00000260227.5 M8/D6	0.014161	ENSG00000137673.9	MMP7	protein_coding	MMP7-201	protein_coding	1119	6	5	High Confidence
ENST00000260247.10	D5/D6	2	1.32552	0.406556	0.33103	ENST00000260247.10 D5/D6	0.00285358	ENSG00000137692.12	DCUN1D5	protein_coding	DCUN1D5-201	protein_coding	12675	8	7	Low Confidence
ENST00000260247.10	F7/D6	2	1.1006	0.138223	0.938045	ENST00000260247.10 F7/D6	0.0911692	ENSG00000137692.12	DCUN1D5	protein_coding	DCUN1D5-201	protein_coding	12675	8	7	Low Confidence
ENST00000260276.8	D5/D6	2	1.23196	0.300808	1.43136	ENST00000260276.8 D5/D6	0.00341098	ENSG00000137720.8	C11orf1	protein_coding	C11orf1-201	protein_coding	2568	4	3	Low Confidence
ENST00000260276.8	F7/D6	2	1.22861	0.296935	1.11742	ENST00000260276.8 F7/D6	0.0231718	ENSG00000137720.8	C11orf1	protein_coding	C11orf1-201	protein_coding	2568	4	3	Low Confidence
ENST00000260276.8	M8/D6	2	0.770281	-0.376837	2.01849	ENST00000260276.8 M8/D6	0.0589912	ENSG00000137720.8	C11orf1	protein_coding	C11orf1-201	protein_coding	2568	4	3	Medium Confidence
ENST00000260359.10	D5/D6	3	0.668638	-0.580851	1.01489	ENST00000260359.10 D5/D6	0.0154874	ENSG00000137804.14	NUSAP1	protein_coding	NUSAP1-201	protein_coding	2409	11	10	High Confidence
ENST00000260359.10	F7/D6	3	0.665545	-0.58746	0.684019	ENST00000260359.10 F7/D6	0.0201151	ENSG00000137804.14	NUSAP1	protein_coding	NUSAP1-201	protein_coding	2409	11	10	High Confidence
ENST00000260359.10	M8/D6	3	1.59202	0.669583	2.99426	ENST00000260359.10 M8/D6	0.00536129	ENSG00000137804.14	NUSAP1	protein_coding	NUSAP1-201	protein_coding	2409	11	10	Medium Confidence
ENST00000260442.3	D5/D6	3	0.975256	-0.0362009	0.607475	ENST00000260442.3 D5/D6	0.304543	ENSG00000137875.4	BCL2L10	protein_coding	BCL2L10-201	protein_coding	1249	2	1	High Confidence
ENST00000260442.3	F7/D6	3	1.67813	0.746828	0.392486	ENST00000260442.3 F7/D6	0.00734761	ENSG00000137875.4	BCL2L10	protein_coding	BCL2L10-201	protein_coding	1249	2	1	High Confidence
ENST00000260442.3	M8/D6	3	0.579105	-0.78832	1.22737	ENST00000260442.3 M8/D6	0.0161993	ENSG00000137875.4	BCL2L10	protein_coding	BCL2L10-201	protein_coding	1249	2	1	High Confidence
ENST00000260443.9	D5/D6	3	1.25171	0.323762	0.998722	ENST00000260443.9 D5/D6	0.00162242	ENSG00000137876.11	RSL24D1	protein_coding	RSL24D1-201	protein_coding	1889	6	5	High Confidence
ENST00000260447.6	M8/D6	3	1.2653	0.339264	1.22691	ENST00000260447.6 M8/D6	0.00186415	ENSG00000137880.6	GCHFR	protein_coding	GCHFR-201	protein_coding	727	3	2	High Confidence
ENST00000260453.4	F7/D6	2	2.82465	1.49729	3.29258	ENST00000260453.4 F7/D6	0.041171	ENSG00000138587.6	MNS1	protein_coding	MNS1-201	protein_coding	2030	10	9	Medium Confidence
ENST00000260563.4	D5/D6	2	0.780181	-0.359277	4.00386	ENST00000260563.4 D5/D6	0.24451	ENSG00000137996.13	RTCA	protein_coding	RTCA-201	protein_coding	1534	12	11	Low Confidence
ENST00000260585.12	D5/D6	3	1.39682	0.480496	3.40967	ENST00000260585.12 D5/D6	0.00449669	ENSG00000138018.19	SELENOI	protein_coding	SELENOI-201	protein_coding	8066	10	9	Medium Confidence
ENST00000260585.12	F7/D6	3	1.19614	0.258177	1.20361	ENST00000260585.12 F7/D6	0.0423844	ENSG00000138018.19	SELENOI	protein_coding	SELENOI-201	protein_coding	8066	10	9	High Confidence
ENST00000260605.12	F7/D6	3	1.31877	0.399143	0.581057	ENST00000260605.12 F7/D6	0.0127291	ENSG00000138036.18	DYNC2LI1	protein_coding	DYNC2LI1-201	protein_coding	1399	13	12	High Confidence
ENST00000260605.12	M8/D6	3	1.24144	0.311991	0.438859	ENST00000260605.12 M8/D6	0.0558276	ENSG00000138036.18	DYNC2LI1	protein_coding	DYNC2LI1-201	protein_coding	1399	13	12	High Confidence
ENST00000260641.10	D5/D6	3	1.21146	0.276469	1.38993	ENST00000260641.10 D5/D6	0.0441099	ENSG00000138071.15	ACTR2	protein_coding	ACTR2-201	protein_coding	3783	9	8	High Confidence
ENST00000260641.10	F7/D6	3	0.862862	-0.212903	0.853831	ENST00000260641.10 F7/D6	0.0734313	ENSG00000138071.15	ACTR2	protein_coding	ACTR2-201	protein_coding	3783	9	8	High Confidence
ENST00000260643.7	D5/D6	3	0.798505	-0.325757	2.81211	ENST00000260643.7 D5/D6	0.0285061	ENSG00000138073.14	PREB	protein_coding	PREB-201	protein_coding	2127	9	8	Medium Confidence
ENST00000260643.7	M8/D6	3	0.781681	-0.355358	0.251024	ENST00000260643.7 M8/D6	0.022752	ENSG00000138073.14	PREB	protein_coding	PREB-201	protein_coding	2127	9	8	High Confidence
ENST00000260653.5	D5/D6	3	3.94641	1.97995	2.03417	ENST00000260653.5 D5/D6	0.00232374	ENSG00000138083.5	SIX3	protein_coding	SIX3-201	protein_coding	2713	2	1	Medium Confidence
ENST00000260653.5	F7/D6	3	2.23946	1.15984	4.80584	ENST00000260653.5 F7/D6	0.0248632	ENSG00000138083.5	SIX3	protein_coding	SIX3-201	protein_coding	2713	2	1	Low Confidence
ENST00000260653.5	M8/D6	3	5.89699	2.55991	0.679901	ENST00000260653.5 M8/D6	4.4597e-05	ENSG00000138083.5	SIX3	protein_coding	SIX3-201	protein_coding	2713	2	1	High Confidence
ENST00000260665.12	D5/D6	2	1.55352	0.635517	0.54271	ENST00000260665.12 D5/D6	0.00239794	ENSG00000138095.20	LRPPRC	protein_coding	LRPPRC-201	protein_coding	6603	38	37	Low Confidence
ENST00000260731.5	M8/D6	3	2.09629	1.05896	7.95293	ENST00000260731.5 M8/D6	0.00350786	ENSG00000138160.7	KIF11	protein_coding	KIF11-201	protein_coding	5016	22	21	Low Confidence
ENST00000260743.10	M8/D6	3	1.75472	0.810941	1.45307	ENST00000260743.10 M8/D6	0.0351299	ENSG00000138172.11	CALHM2	protein_coding	CALHM2-201	protein_coding	1914	4	3	High Confidence
ENST00000260746.6	D5/D6	2	0.904409	-0.144967	0.44461	ENST00000260746.6 D5/D6	0.0115012	ENSG00000138175.9	ARL3	protein_coding	ARL3-201	protein_coding	3834	6	5	Low Confidence
ENST00000260746.6	M8/D6	3	1.1483	0.199064	1.74832	ENST00000260746.6 M8/D6	0.0553845	ENSG00000138175.9	ARL3	protein_coding	ARL3-201	protein_coding	3834	6	5	High Confidence
ENST00000260753.8	M8/D6	2	1.38628	0.470939	1.96395	ENST00000260753.8 M8/D6	0.0182428	ENSG00000138182.15	KIF20B	protein_coding	KIF20B-201	protein_coding	6306	33	32	Medium Confidence
ENST00000260762.10	D5/D6	2	1.52073	0.604696	0.939809	ENST00000260762.10 D5/D6	0.0700044	ENSG00000138190.17	EXOC6	protein_coding	EXOC6-201	protein_coding	3564	22	21	Low Confidence
ENST00000260762.10	M8/D6	3	0.622672	-0.687481	5.20456	ENST00000260762.10 M8/D6	0.0591032	ENSG00000138190.17	EXOC6	protein_coding	EXOC6-201	protein_coding	3564	22	21	Low Confidence
ENST00000260810.10	D5/D6	2	1.66958	0.729653	11.6339	ENST00000260810.10 D5/D6	0.0109916	ENSG00000163781.14	TOPBP1	protein_coding	TOPBP1-201	protein_coding	5761	28	27	Low Confidence
ENST00000260818.11	D5/D6	2	1.25861	0.331759	0.983434	ENST00000260818.11 D5/D6	0.185073	ENSG00000138246.17	DNAJC13	protein_coding	DNAJC13-201	protein_coding	7754	56	55	Low Confidence
ENST00000260956.9	D5/D6	3	1.14909	0.20028	1.21471	ENST00000260956.9 D5/D6	0.0470381	ENSG00000138385.16	SSB	protein_coding	SSB-201	protein_coding	1650	12	11	High Confidence
ENST00000261017.9	D5/D6	2	1.19332	0.254873	1.25562	ENST00000261017.9 D5/D6	0.0426714	ENSG00000138443.17	ABI2	protein_coding	ABI2-202	protein_coding	6484	10	9	Low Confidence
ENST00000261017.9	F7/D6	2	1.23236	0.301404	0.473734	ENST00000261017.9 F7/D6	0.150398	ENSG00000138443.17	ABI2	protein_coding	ABI2-202	protein_coding	6484	10	9	Low Confidence
ENST00000261017.9	M8/D6	2	1.43277	0.51881	0.123165	ENST00000261017.9 M8/D6	0.0113985	ENSG00000138443.17	ABI2	protein_coding	ABI2-202	protein_coding	6484	10	9	Low Confidence
ENST00000261070.7	D5/D6	3	0.628759	-0.670484	2.69175	ENST00000261070.7 D5/D6	0.000423757	ENSG00000138495.7	COX17	protein_coding	COX17-201	protein_coding	426	3	2	Medium Confidence
ENST00000261168.9	F7/D6	2	0.72059	-0.472955	1.6896	ENST00000261168.9 F7/D6	0.00942846	ENSG00000171681.13	ATF7IP	protein_coding	ATF7IP-201	protein_coding	8823	15	14	Low Confidence
ENST00000261191.12	D5/D6	4	1.68601	0.753215	1.35635	ENST00000261191.12 D5/D6	0.000282506	ENSG00000064102.15	INTS13	protein_coding	INTS13-201	protein_coding	2634	17	16	High Confidence
ENST00000261192.12	D5/D6	3	1.92192	0.942323	1.23802	ENST00000261192.12 D5/D6	2.42837e-07	ENSG00000060982.15	BCAT1	protein_coding	BCAT1-201	protein_coding	9314	11	10	High Confidence
ENST00000261226.9	D5/D6	2	0.821137	-0.28452	1.72737	ENST00000261226.9 D5/D6	0.177132	ENSG00000057704.13	TMCC3	protein_coding	TMCC3-201	protein_coding	5874	4	3	Low Confidence
ENST00000261233.9	D5/D6	3	0.345864	-1.53208	1.57176	ENST00000261233.9 D5/D6	0.000310884	ENSG00000090376.11	IRAK3	protein_coding	IRAK3-201	protein_coding	8328	12	11	High Confidence
ENST00000261233.9	F7/D6	3	1.56459	0.644853	2.52702	ENST00000261233.9 F7/D6	0.0070467	ENSG00000090376.11	IRAK3	protein_coding	IRAK3-201	protein_coding	8328	12	11	Medium Confidence
ENST00000261249.7	D5/D6	2	1.34716	0.429916	0.153609	ENST00000261249.7 D5/D6	0.0128828	ENSG00000126814.7	TRMT5	protein_coding	TRMT5-201	protein_coding	5304	5	4	Low Confidence
ENST00000261250.8	D5/D6	2	0.750423	-0.414388	1.50444	ENST00000261250.8 D5/D6	0.0259784	ENSG00000047621.12	C12orf4	protein_coding	C12orf4-201	protein_coding	3817	14	13	Low Confidence
ENST00000261254.8	F7/D6	3	0.738306	-0.440363	4.22284	ENST00000261254.8 F7/D6	0.00723322	ENSG00000118971.9	CCND2	protein_coding	CCND2-201	protein_coding	6493	5	4	Low Confidence
ENST00000261263.5	D5/D6	2	0.917583	-0.124113	0.577109	ENST00000261263.5 D5/D6	0.0704541	ENSG00000080371.6	RAB21	protein_coding	RAB21-201	protein_coding	15558	7	6	Low Confidence
ENST00000261313.3	D5/D6	3	1.08201	0.113682	0.507912	ENST00000261313.3 D5/D6	0.0682854	ENSG00000089220.5	PEBP1	protein_coding	PEBP1-201	protein_coding	1431	4	3	High Confidence
ENST00000261340.11	D5/D6	4	0.102061	-3.29583	3.99824	ENST00000261340.11 D5/D6	1.56258e-06	ENSG00000069493.15	CLEC2D	protein_coding	CLEC2D-202	protein_coding	935	6	5	Low Confidence
ENST00000261340.11	F7/D6	3	0.766622	-0.383566	1.03505	ENST00000261340.11 F7/D6	0.0289166	ENSG00000069493.15	CLEC2D	protein_coding	CLEC2D-202	protein_coding	935	6	5	High Confidence
ENST00000261340.11	M8/D6	4	0.442355	-1.17868	2.98887	ENST00000261340.11 M8/D6	6.41785e-05	ENSG00000069493.15	CLEC2D	protein_coding	CLEC2D-202	protein_coding	935	6	5	Medium Confidence
ENST00000261349.9	D5/D6	2	1.59573	0.67383	2.30417	ENST00000261349.9 D5/D6	0.0475392	ENSG00000070018.9	LRP6	protein_coding	LRP6-201	protein_coding	10252	23	22	Medium Confidence
ENST00000261353.9	D5/D6	3	0.776785	-0.364465	0.598495	ENST00000261353.9 D5/D6	0.00969645	ENSG00000119801.13	YPEL5	protein_coding	YPEL5-201	protein_coding	2136	3	2	High Confidence
ENST00000261366.10	M8/D6	3	1.27277	0.347937	0.499509	ENST00000261366.10 M8/D6	0.0349959	ENSG00000113368.12	LMNB1	protein_coding	LMNB1-201	protein_coding	2890	11	10	High Confidence
ENST00000261377.11	M8/D6	3	1.94439	0.952247	7.08589	ENST00000261377.11 M8/D6	0.0219167	ENSG00000005189.20	REXO5	protein_coding	REXO5-201	protein_coding	2691	20	19	Low Confidence
ENST00000261381.7	D5/D6	2	0.431875	-1.21185	2.71744	ENST00000261381.7 D5/D6	0.00728081	ENSG00000103489.12	XYLT1	protein_coding	XYLT1-201	protein_coding	9970	12	11	Medium Confidence
ENST00000261381.7	M8/D6	2	0.393425	-1.34622	2.29339	ENST00000261381.7 M8/D6	0.0174351	ENSG00000103489.12	XYLT1	protein_coding	XYLT1-201	protein_coding	9970	12	11	Medium Confidence
ENST00000261388.7	M8/D6	3	1.39879	0.47869	6.28196	ENST00000261388.7 M8/D6	0.188258	ENSG00000011638.11	LDAF1	protein_coding	LDAF1-202	protein_coding	1812	5	4	Low Confidence
ENST00000261401.8	D5/D6	4	1.35388	0.436988	0.70656	ENST00000261401.8 D5/D6	0.00639107	ENSG00000110880.11	CORO1C	protein_coding	CORO1C-201	protein_coding	3814	11	10	High Confidence
ENST00000261401.8	M8/D6	4	1.26793	0.342248	1.0338	ENST00000261401.8 M8/D6	0.022945	ENSG00000110880.11	CORO1C	protein_coding	CORO1C-201	protein_coding	3814	11	10	High Confidence
ENST00000261407.9	D5/D6	2	0.828181	-0.272949	3.66117	ENST00000261407.9 D5/D6	0.187288	ENSG00000111684.11	LPCAT3	protein_coding	LPCAT3-201	protein_coding	2235	13	12	Medium Confidence
ENST00000261407.9	M8/D6	3	1.72996	0.789087	3.41619	ENST00000261407.9 M8/D6	0.00563688	ENSG00000111684.11	LPCAT3	protein_coding	LPCAT3-201	protein_coding	2235	13	12	Medium Confidence
ENST00000261413.10	D5/D6	3	1.19738	0.259392	1.84232	ENST00000261413.10 D5/D6	0.00578383	ENSG00000113048.19	MRPS27	protein_coding	MRPS27-201	protein_coding	2770	11	10	Medium Confidence
ENST00000261416.12	D5/D6	3	1.43327	0.518597	2.21536	ENST00000261416.12 D5/D6	0.00866191	ENSG00000049860.14	HEXB	protein_coding	HEXB-201	protein_coding	1812	14	13	Medium Confidence
ENST00000261427.10	F7/D6	2	0.874971	-0.192983	2.00384	ENST00000261427.10 F7/D6	0.0500033	ENSG00000078140.14	UBE2K	protein_coding	UBE2K-201	protein_coding	5153	7	6	Medium Confidence
ENST00000261438.10	D5/D6	2	0.564238	-0.826022	2.35043	ENST00000261438.10 D5/D6	0.00164277	ENSG00000109787.13	KLF3	protein_coding	KLF3-201	protein_coding	5594	6	5	Medium Confidence
ENST00000261438.10	F7/D6	2	0.8417	-0.24902	2.34608	ENST00000261438.10 F7/D6	0.183333	ENSG00000109787.13	KLF3	protein_coding	KLF3-201	protein_coding	5594	6	5	Medium Confidence
ENST00000261438.10	M8/D6	2	0.58445	-0.775046	1.65631	ENST00000261438.10 M8/D6	0.00472686	ENSG00000109787.13	KLF3	protein_coding	KLF3-201	protein_coding	5594	6	5	Low Confidence
ENST00000261439.9	D5/D6	2	0.773346	-0.3748	7.42416	ENST00000261439.9 D5/D6	0.0497638	ENSG00000065882.18	TBC1D1	protein_coding	TBC1D1-201	protein_coding	5703	20	19	Low Confidence
ENST00000261439.9	F7/D6	2	1.33458	0.415876	2.65041	ENST00000261439.9 F7/D6	0.120862	ENSG00000065882.18	TBC1D1	protein_coding	TBC1D1-201	protein_coding	5703	20	19	Medium Confidence
ENST00000261455.9	F7/D6	2	1.30175	0.380397	0.903341	ENST00000261455.9 F7/D6	0.045575	ENSG00000065600.13	PACC1	protein_coding	PACC1-201	protein_coding	2469	8	7	Low Confidence
ENST00000261458.8	F7/D6	3	0.483876	-1.05703	8.03142	ENST00000261458.8 F7/D6	0.0326322	ENSG00000054392.13	HHAT	protein_coding	HHAT-201	protein_coding	3639	12	11	Low Confidence
ENST00000261464.10	D5/D6	3	1.80547	0.846865	6.29593	ENST00000261464.10 D5/D6	0.00324132	ENSG00000082512.15	TRAF5	protein_coding	TRAF5-201	protein_coding	3976	11	10	Low Confidence
ENST00000261464.10	M8/D6	3	1.45017	0.533392	4.48756	ENST00000261464.10 M8/D6	0.0168708	ENSG00000082512.15	TRAF5	protein_coding	TRAF5-201	protein_coding	3976	11	10	Low Confidence
ENST00000261475.10	D5/D6	2	0.873813	-0.19471	1.21458	ENST00000261475.10 D5/D6	0.0631222	ENSG00000092020.11	PPP2R3C	protein_coding	PPP2R3C-201	protein_coding	1511	13	12	Low Confidence
ENST00000261479.9	D5/D6	3	0.942297	-0.085796	0.589881	ENST00000261479.9 D5/D6	0.0303512	ENSG00000100902.11	PSMA6	protein_coding	PSMA6-201	protein_coding	1023	7	6	High Confidence
ENST00000261483.5	D5/D6	3	0.480255	-1.06398	6.47049	ENST00000261483.5 D5/D6	0.0140555	ENSG00000112893.10	MAN2A1	protein_coding	MAN2A1-201	protein_coding	6553	22	21	Low Confidence
ENST00000261483.5	M8/D6	3	0.294753	-1.77016	7.34187	ENST00000261483.5 M8/D6	0.000895371	ENSG00000112893.10	MAN2A1	protein_coding	MAN2A1-201	protein_coding	6553	22	21	Low Confidence
ENST00000261497.9	D5/D6	2	1.27827	0.353532	3.03393	ENST00000261497.9 D5/D6	0.000810815	ENSG00000124422.12	USP22	protein_coding	USP22-201	protein_coding	5189	13	12	Medium Confidence
ENST00000261497.9	F7/D6	2	0.7866	-0.347044	3.21661	ENST00000261497.9 F7/D6	0.00639791	ENSG00000124422.12	USP22	protein_coding	USP22-201	protein_coding	5189	13	12	Medium Confidence
ENST00000261497.9	M8/D6	2	0.888	-0.172232	3.45916	ENST00000261497.9 M8/D6	0.0458294	ENSG00000124422.12	USP22	protein_coding	USP22-201	protein_coding	5189	13	12	Medium Confidence
ENST00000261499.11	D5/D6	2	0.816381	-0.292799	1.25147	ENST00000261499.11 D5/D6	0.222647	ENSG00000108641.20	B9D1	protein_coding	B9D1-201	protein_coding	913	7	6	Low Confidence
ENST00000261499.11	F7/D6	3	1.97452	0.9806	2.48111	ENST00000261499.11 F7/D6	0.0260483	ENSG00000108641.20	B9D1	protein_coding	B9D1-201	protein_coding	913	7	6	Medium Confidence
ENST00000261507.11	D5/D6	2	0.811839	-0.301154	2.41192	ENST00000261507.11 D5/D6	0.0924847	ENSG00000052802.13	MSMO1	protein_coding	MSMO1-201	protein_coding	2227	6	5	Medium Confidence
ENST00000261507.11	M8/D6	3	1.37709	0.460549	2.75592	ENST00000261507.11 M8/D6	0.00450898	ENSG00000052802.13	MSMO1	protein_coding	MSMO1-201	protein_coding	2227	6	5	Medium Confidence
ENST00000261520.9	D5/D6	2	1.30166	0.37997	2.31337	ENST00000261520.9 D5/D6	0.0772065	ENSG00000128915.12	ICE2	protein_coding	ICE2-201	protein_coding	7206	16	15	Medium Confidence
ENST00000261530.12	F7/D6	2	1.39782	0.48218	3.7151	ENST00000261530.12 F7/D6	0.0626601	ENSG00000089916.18	GPATCH2L	protein_coding	GPATCH2L-201	protein_coding	14021	10	9	Low Confidence
ENST00000261574.10	M8/D6	2	0.950854	-0.0897641	15.2878	ENST00000261574.10 M8/D6	0.0691929	ENSG00000065150.21	IPO5	protein_coding	IPO5-201	protein_coding	6001	29	28	Low Confidence
ENST00000261590.13	F7/D6	2	0.515532	-0.955892	0.604529	ENST00000261590.13 F7/D6	0.0173236	ENSG00000046604.14	DSG2	protein_coding	DSG2-201	protein_coding	5697	15	14	Low Confidence
ENST00000261590.13	M8/D6	2	1.63858	0.71244	0.244599	ENST00000261590.13 M8/D6	0.00666605	ENSG00000046604.14	DSG2	protein_coding	DSG2-201	protein_coding	5697	15	14	Low Confidence
ENST00000261593.8	D5/D6	3	1.25708	0.330049	0.411119	ENST00000261593.8 D5/D6	0.0253224	ENSG00000134758.14	RNF138	protein_coding	RNF138-202	protein_coding	3551	8	7	High Confidence
ENST00000261597.9	M8/D6	4	2.48489	1.31185	2.46244	ENST00000261597.9 M8/D6	5.057e-05	ENSG00000080986.13	NDC80	protein_coding	NDC80-201	protein_coding	2126	17	16	Medium Confidence
ENST00000261600.11	F7/D6	3	0.803813	-0.316282	2.88107	ENST00000261600.11 F7/D6	0.117826	ENSG00000079134.13	THOC1	protein_coding	THOC1-201	protein_coding	2108	21	20	Medium Confidence
ENST00000261622.5	F7/D6	3	0.890378	-0.169483	3.74064	ENST00000261622.5 F7/D6	0.0852733	ENSG00000103257.9	SLC7A5	protein_coding	SLC7A5-201	protein_coding	4556	10	9	Low Confidence
ENST00000261622.5	M8/D6	3	0.784703	-0.355471	6.3908	ENST00000261622.5 M8/D6	0.0204397	ENSG00000103257.9	SLC7A5	protein_coding	SLC7A5-201	protein_coding	4556	10	9	Low Confidence
ENST00000261623.8	D5/D6	3	0.915145	-0.127932	0.18191	ENST00000261623.8 D5/D6	0.0396799	ENSG00000051523.12	CYBA	protein_coding	CYBA-201	protein_coding	692	6	5	High Confidence
ENST00000261623.8	F7/D6	3	0.847573	-0.238599	0.259779	ENST00000261623.8 F7/D6	0.0600806	ENSG00000051523.12	CYBA	protein_coding	CYBA-201	protein_coding	692	6	5	High Confidence
ENST00000261636.13	D5/D6	3	0.91456	-0.129478	2.07178	ENST00000261636.13 D5/D6	0.290414	ENSG00000120805.14	ARL1	protein_coding	ARL1-201	protein_coding	3197	6	5	Medium Confidence
ENST00000261636.13	M8/D6	2	0.85232	-0.230552	0.522101	ENST00000261636.13 M8/D6	0.0489424	ENSG00000120805.14	ARL1	protein_coding	ARL1-201	protein_coding	3197	6	5	Low Confidence
ENST00000261637.5	D5/D6	3	1.48411	0.569386	1.21882	ENST00000261637.5 D5/D6	0.00859286	ENSG00000120800.5	UTP20	protein_coding	UTP20-201	protein_coding	9031	62	61	High Confidence
ENST00000261646.11	D5/D6	3	0.916359	-0.130194	5.32737	ENST00000261646.11 D5/D6	0.128609	ENSG00000072310.18	SREBF1	protein_coding	SREBF1-201	protein_coding	4901	19	18	Low Confidence
ENST00000261652.7	D5/D6	2	0.912694	-0.132083	1.99257	ENST00000261652.7 D5/D6	0.0180241	ENSG00000240505.9	TNFRSF13B	protein_coding	TNFRSF13B-201	protein_coding	1391	5	4	Medium Confidence
ENST00000261708.9	D5/D6	2	1.29312	0.370855	0.123983	ENST00000261708.9 D5/D6	0.0163498	ENSG00000108651.10	UTP6	protein_coding	UTP6-201	protein_coding	4330	19	18	Low Confidence
ENST00000261714.11	D5/D6	2	1.17071	0.227288	1.12134	ENST00000261714.11 D5/D6	0.101489	ENSG00000108578.15	BLMH	protein_coding	BLMH-201	protein_coding	2307	12	11	Low Confidence
ENST00000261721.9	D5/D6	4	1.2936	0.369563	2.95633	ENST00000261721.9 D5/D6	0.027821	ENSG00000064726.10	BTBD1	protein_coding	BTBD1-201	protein_coding	3194	8	7	Medium Confidence
ENST00000261733.7	D5/D6	2	0.749728	-0.415567	0.299072	ENST00000261733.7 D5/D6	0.0148831	ENSG00000111275.13	ALDH2	protein_coding	ALDH2-201	protein_coding	9561	13	12	Low Confidence
ENST00000261733.7	F7/D6	2	0.860364	-0.217133	1.44945	ENST00000261733.7 F7/D6	0.157451	ENSG00000111275.13	ALDH2	protein_coding	ALDH2-201	protein_coding	9561	13	12	Low Confidence
ENST00000261733.7	M8/D6	2	1.48088	0.566352	1.19938	ENST00000261733.7 M8/D6	0.00160132	ENSG00000111275.13	ALDH2	protein_coding	ALDH2-201	protein_coding	9561	13	12	Low Confidence
ENST00000261735.4	F7/D6	3	0.84429	-0.247805	5.08244	ENST00000261735.4 F7/D6	0.00760244	ENSG00000089248.7	ERP29	protein_coding	ERP29-201	protein_coding	1623	3	2	Low Confidence
ENST00000261735.4	M8/D6	3	0.871681	-0.204001	6.50329	ENST00000261735.4 M8/D6	0.0145422	ENSG00000089248.7	ERP29	protein_coding	ERP29-201	protein_coding	1623	3	2	Low Confidence
ENST00000261739.9	D5/D6	2	1.49704	0.581955	1.46343	ENST00000261739.9 D5/D6	0.0161827	ENSG00000076513.17	ANKRD13A	protein_coding	ANKRD13A-201	protein_coding	4241	15	14	Low Confidence
ENST00000261749.11	F7/D6	3	0.741627	-0.433429	3.84661	ENST00000261749.11 F7/D6	0.0318321	ENSG00000086666.19	ZFAND6	protein_coding	ZFAND6-201	protein_coding	1706	7	6	Low Confidence
ENST00000261755.9	F7/D6	2	1.47577	0.558552	6.35043	ENST00000261755.9 F7/D6	0.117869	ENSG00000103876.14	FAH	protein_coding	FAH-201	protein_coding	1471	15	14	Low Confidence
ENST00000261755.9	M8/D6	3	2.13576	1.08909	6.22711	ENST00000261755.9 M8/D6	0.0178881	ENSG00000103876.14	FAH	protein_coding	FAH-201	protein_coding	1471	15	14	Low Confidence
ENST00000261758.6	M8/D6	3	0.765724	-0.387325	3.95682	ENST00000261758.6 M8/D6	0.0411331	ENSG00000117899.11	MESD	protein_coding	MESD-201	protein_coding	4200	3	2	Low Confidence
ENST00000261772.13	M8/D6	2	0.911024	-0.134677	1.81431	ENST00000261772.13 M8/D6	0.0794094	ENSG00000090861.17	AARS1	protein_coding	AARS1-201	protein_coding	3437	21	20	Medium Confidence
ENST00000261778.2	D5/D6	2	1.37401	0.457786	2.90277	ENST00000261778.2 D5/D6	0.2071	ENSG00000103047.8	TANGO6	protein_coding	TANGO6-201	protein_coding	4893	18	17	Medium Confidence
ENST00000261783.4	M8/D6	3	2.10264	1.07198	1.24854	ENST00000261783.4 M8/D6	0.0307357	ENSG00000081181.8	ARG2	protein_coding	ARG2-201	protein_coding	1911	8	7	High Confidence
ENST00000261811.6	M8/D6	4	1.17698	0.23509	0.146808	ENST00000261811.6 M8/D6	0.0461413	ENSG00000120306.11	CYSTM1	protein_coding	CYSTM1-201	protein_coding	790	3	2	High Confidence
ENST00000261813.9	D5/D6	3	0.913052	-0.131328	0.821674	ENST00000261813.9 D5/D6	0.0462683	ENSG00000113068.10	PFDN1	protein_coding	PFDN1-201	protein_coding	1336	4	3	High Confidence
ENST00000261822.5	M8/D6	3	1.30167	0.3802	1.06907	ENST00000261822.5 M8/D6	0.0779526	ENSG00000110987.9	BCL7A	protein_coding	BCL7A-201	protein_coding	3722	6	5	High Confidence
ENST00000261837.12	D5/D6	3	2.02878	1.01918	3.13804	ENST00000261837.12 D5/D6	0.00350525	ENSG00000069966.19	GNB5	protein_coding	GNB5-201	protein_coding	8934	13	12	Medium Confidence
ENST00000261837.12	F7/D6	2	1.70527	0.737118	21.1102	ENST00000261837.12 F7/D6	0.0268705	ENSG00000069966.19	GNB5	protein_coding	GNB5-201	protein_coding	8934	13	12	Low Confidence
ENST00000261837.12	M8/D6	2	1.43985	0.524053	5.07616	ENST00000261837.12 M8/D6	0.0481714	ENSG00000069966.19	GNB5	protein_coding	GNB5-201	protein_coding	8934	13	12	Low Confidence
ENST00000261839.12	M8/D6	2	2.05573	1.03724	5.77131	ENST00000261839.12 M8/D6	0.0614044	ENSG00000128833.13	MYO5C	protein_coding	MYO5C-201	protein_coding	6977	41	40	Low Confidence
ENST00000261842.10	F7/D6	2	0.749162	-0.416925	1.95259	ENST00000261842.10 F7/D6	0.0468178	ENSG00000081014.11	AP4E1	protein_coding	AP4E1-201	protein_coding	6743	21	20	Medium Confidence
ENST00000261845.7	D5/D6	2	1.13389	0.18121	0.989748	ENST00000261845.7 D5/D6	0.210301	ENSG00000069956.14	MAPK6	protein_coding	MAPK6-201	protein_coding	5330	6	5	Low Confidence
ENST00000261854.10	D5/D6	3	0.73928	-0.442444	6.9194	ENST00000261854.10 D5/D6	0.00416982	ENSG00000138600.11	SPPL2A	protein_coding	SPPL2A-201	protein_coding	7270	15	14	Low Confidence
ENST00000261854.10	F7/D6	2	0.849796	-0.235396	2.84726	ENST00000261854.10 F7/D6	0.0374959	ENSG00000138600.11	SPPL2A	protein_coding	SPPL2A-201	protein_coding	7270	15	14	Medium Confidence
ENST00000261867.5	D5/D6	2	0.442885	-1.17568	3.07203	ENST00000261867.5 D5/D6	0.0282068	ENSG00000104154.7	SLC30A4	protein_coding	SLC30A4-201	protein_coding	7110	8	7	Medium Confidence
ENST00000261867.5	F7/D6	2	0.497453	-1.00813	3.23922	ENST00000261867.5 F7/D6	0.0428192	ENSG00000104154.7	SLC30A4	protein_coding	SLC30A4-201	protein_coding	7110	8	7	Medium Confidence
ENST00000261868.10	D5/D6	3	1.19548	0.256676	2.544	ENST00000261868.10 D5/D6	0.0409273	ENSG00000104131.13	EIF3J	protein_coding	EIF3J-201	protein_coding	2479	8	7	Medium Confidence
ENST00000261868.10	M8/D6	2	0.893418	-0.162594	0.0969316	ENST00000261868.10 M8/D6	0.183352	ENSG00000104131.13	EIF3J	protein_coding	EIF3J-201	protein_coding	2479	8	7	Low Confidence
ENST00000261875.10	D5/D6	4	1.31402	0.393527	1.46727	ENST00000261875.10 D5/D6	0.00663465	ENSG00000074696.13	HACD3	protein_coding	HACD3-201	protein_coding	3228	11	10	High Confidence
ENST00000261881.9	D5/D6	4	1.58269	0.661557	1.972	ENST00000261881.9 D5/D6	0.00475992	ENSG00000075131.10	TIPIN	protein_coding	TIPIN-201	protein_coding	1728	8	7	Medium Confidence
ENST00000261884.8	D5/D6	3	0.751052	-0.413036	0.380627	ENST00000261884.8 D5/D6	0.0376676	ENSG00000103671.10	TRIP4	protein_coding	TRIP4-201	protein_coding	2013	13	12	High Confidence
ENST00000261893.9	D5/D6	4	0.691769	-0.531853	0.993681	ENST00000261893.9 D5/D6	0.123358	ENSG00000103642.12	LACTB	protein_coding	LACTB-201	protein_coding	1911	6	5	High Confidence
ENST00000261893.9	M8/D6	3	0.74886	-0.417431	1.17502	ENST00000261893.9 M8/D6	0.0773926	ENSG00000103642.12	LACTB	protein_coding	LACTB-201	protein_coding	1911	6	5	High Confidence
ENST00000261918.9	D5/D6	3	0.556883	-0.84477	1.22727	ENST00000261918.9 D5/D6	0.00307941	ENSG00000138623.10	SEMA7A	protein_coding	SEMA7A-201	protein_coding	3376	14	13	High Confidence
ENST00000261918.9	F7/D6	3	1.33378	0.415499	0.373229	ENST00000261918.9 F7/D6	0.00471428	ENSG00000138623.10	SEMA7A	protein_coding	SEMA7A-201	protein_coding	3376	14	13	High Confidence
ENST00000261918.9	M8/D6	3	1.28126	0.35747	0.797298	ENST00000261918.9 M8/D6	0.0446849	ENSG00000138623.10	SEMA7A	protein_coding	SEMA7A-201	protein_coding	3376	14	13	High Confidence
ENST00000261973.12	D5/D6	3	1.37068	0.452472	4.1488	ENST00000261973.12 D5/D6	0.00525766	ENSG00000119707.14	RBM25	protein_coding	RBM25-201	protein_coding	6813	19	18	Low Confidence
ENST00000262013.12	D5/D6	3	1.63558	0.707396	4.11077	ENST00000262013.12 D5/D6	0.000184873	ENSG00000008294.22	SPAG9	protein_coding	SPAG9-201	protein_coding	8276	30	29	Low Confidence
ENST00000262027.10	M8/D6	2	0.895281	-0.159644	0.887747	ENST00000262027.10 M8/D6	0.0303652	ENSG00000166986.15	MARS1	protein_coding	MARS1-201	protein_coding	2797	21	20	Low Confidence
ENST00000262030.8	D5/D6	2	1.10529	0.144408	0.518575	ENST00000262030.8 D5/D6	0.0565505	ENSG00000110955.9	ATP5F1B	protein_coding	ATP5F1B-201	protein_coding	1759	10	9	Low Confidence
ENST00000262030.8	F7/D6	2	1.06637	0.0926982	0.286349	ENST00000262030.8 F7/D6	0.172043	ENSG00000110955.9	ATP5F1B	protein_coding	ATP5F1B-201	protein_coding	1759	10	9	Low Confidence
ENST00000262031.10	M8/D6	2	2.98455	1.57715	2.25823	ENST00000262031.10 M8/D6	0.00437817	ENSG00000076067.13	RBMS2	protein_coding	RBMS2-201	protein_coding	8488	14	13	Medium Confidence
ENST00000262033.11	F7/D6	2	0.887912	-0.171542	0.652437	ENST00000262033.11 F7/D6	0.0824863	ENSG00000110958.16	PTGES3	protein_coding	PTGES3-201	protein_coding	1898	8	7	Low Confidence
ENST00000262043.8	D5/D6	2	1.28751	0.356161	10.7733	ENST00000262043.8 D5/D6	0.0585664	ENSG00000118482.12	PHF3	protein_coding	PHF3-201	protein_coding	18797	16	15	Low Confidence
ENST00000262053.8	F7/D6	2	0.867121	-0.205739	0.782475	ENST00000262053.8 F7/D6	0.14905	ENSG00000123268.9	ATF1	protein_coding	ATF1-201	protein_coding	2412	7	6	Low Confidence
ENST00000262055.9	F7/D6	3	1.33935	0.421231	1.44738	ENST00000262055.9 F7/D6	0.0376465	ENSG00000050426.16	LETMD1	protein_coding	LETMD1-201	protein_coding	2106	9	8	High Confidence
ENST00000262056.14	D5/D6	3	1.29822	0.376507	0.429744	ENST00000262056.14 D5/D6	0.000280569	ENSG00000063046.18	EIF4B	protein_coding	EIF4B-201	protein_coding	3856	15	14	High Confidence
ENST00000262056.14	M8/D6	3	0.822296	-0.282342	0.706525	ENST00000262056.14 M8/D6	0.00282443	ENSG00000063046.18	EIF4B	protein_coding	EIF4B-201	protein_coding	3856	15	14	High Confidence
ENST00000262061.7	D5/D6	4	0.807263	-0.309425	1.57395	ENST00000262061.7 D5/D6	0.00468978	ENSG00000111481.10	COPZ1	protein_coding	COPZ1-201	protein_coding	1890	9	8	High Confidence
ENST00000262061.7	M8/D6	3	0.870659	-0.200479	2.15076	ENST00000262061.7 M8/D6	0.00454237	ENSG00000111481.10	COPZ1	protein_coding	COPZ1-201	protein_coding	1890	9	8	Medium Confidence
ENST00000262065.8	D5/D6	3	0.714469	-0.48524	1.12932	ENST00000262065.8 D5/D6	0.0049905	ENSG00000108960.9	MMD	protein_coding	MMD-201	protein_coding	2569	7	6	High Confidence
ENST00000262077.3	D5/D6	2	1.31514	0.392668	5.93677	ENST00000262077.3 D5/D6	0.0115943	ENSG00000124789.12	NUP153	protein_coding	NUP153-201	protein_coding	6026	22	21	Low Confidence
ENST00000262096.13	D5/D6	2	1.34137	0.423694	0.421818	ENST00000262096.13 D5/D6	0.00898116	ENSG00000104219.13	ZDHHC2	protein_coding	ZDHHC2-201	protein_coding	5924	13	12	Low Confidence
ENST00000262109.8	D5/D6	3	1.15458	0.207202	1.09208	ENST00000262109.8 D5/D6	0.0425044	ENSG00000104714.14	ERICH1	protein_coding	ERICH1-201	protein_coding	1798	6	5	High Confidence
ENST00000262120.10	D5/D6	4	2.9936	1.58078	2.26348	ENST00000262120.10 D5/D6	1.89274e-06	ENSG00000128791.12	TWSG1	protein_coding	TWSG1-201	protein_coding	3750	5	4	Medium Confidence
ENST00000262120.10	M8/D6	4	1.73393	0.794017	0.372911	ENST00000262120.10 M8/D6	0.000744929	ENSG00000128791.12	TWSG1	protein_coding	TWSG1-201	protein_coding	3750	5	4	High Confidence
ENST00000262124.15	D5/D6	3	1.39074	0.475791	0.634491	ENST00000262124.15 D5/D6	0.0217172	ENSG00000085415.16	SEH1L	protein_coding	SEH1L-201	protein_coding	3494	9	8	High Confidence
ENST00000262139.10	D5/D6	3	0.721077	-0.472044	1.36021	ENST00000262139.10 D5/D6	0.00115072	ENSG00000070540.13	WIPI1	protein_coding	WIPI1-201	protein_coding	1908	13	12	High Confidence
ENST00000262139.10	F7/D6	3	1.1637	0.213078	6.1161	ENST00000262139.10 F7/D6	0.0239345	ENSG00000070540.13	WIPI1	protein_coding	WIPI1-201	protein_coding	1908	13	12	Low Confidence
ENST00000262139.10	M8/D6	3	0.647565	-0.630955	5.20268	ENST00000262139.10 M8/D6	0.0021571	ENSG00000070540.13	WIPI1	protein_coding	WIPI1-201	protein_coding	1908	13	12	Low Confidence
ENST00000262177.9	F7/D6	2	0.825509	-0.276644	0.0949801	ENST00000262177.9 F7/D6	0.0575327	ENSG00000105993.15	DNAJB6	protein_coding	DNAJB6-201	protein_coding	2489	10	9	Low Confidence
ENST00000262187.10	F7/D6	2	0.816903	-0.291843	1.05058	ENST00000262187.10 F7/D6	0.0787298	ENSG00000106615.10	RHEB	protein_coding	RHEB-201	protein_coding	2046	8	7	Low Confidence
ENST00000262189.11	D5/D6	2	1.02395	0.0331578	3.70936	ENST00000262189.11 D5/D6	0.253772	ENSG00000055609.21	KMT2C	protein_coding	KMT2C-201	protein_coding	16860	59	58	Low Confidence
ENST00000262213.7	D5/D6	3	0.917283	-0.125522	2.59988	ENST00000262213.7 D5/D6	0.080411	ENSG00000067167.8	TRAM1	protein_coding	TRAM1-201	protein_coding	3056	11	10	Medium Confidence
ENST00000262213.7	M8/D6	3	0.825998	-0.275797	0.225751	ENST00000262213.7 M8/D6	0.013419	ENSG00000067167.8	TRAM1	protein_coding	TRAM1-201	protein_coding	3056	11	10	High Confidence
ENST00000262215.8	D5/D6	2	1.24396	0.314934	0.240349	ENST00000262215.8 D5/D6	0.117118	ENSG00000066777.9	ARFGEF1	protein_coding	ARFGEF1-201	protein_coding	7320	39	38	Low Confidence
ENST00000262225.8	M8/D6	4	0.783878	-0.351807	1.54625	ENST00000262225.8 M8/D6	0.0273173	ENSG00000086598.11	TMED2	protein_coding	TMED2-201	protein_coding	2544	4	3	High Confidence
ENST00000262241.7	D5/D6	2	1.01512	0.0193998	5.5789	ENST00000262241.7 D5/D6	0.0779615	ENSG00000089902.10	RCOR1	protein_coding	RCOR1-201	protein_coding	5751	12	11	Low Confidence
ENST00000262244.6	D5/D6	2	0.475218	-1.07335	0.465153	ENST00000262244.6 D5/D6	0.04997	ENSG00000120162.10	MOB3B	protein_coding	MOB3B-201	protein_coding	6487	4	3	Low Confidence
ENST00000262265.10	D5/D6	3	0.935022	-0.0969474	0.372912	ENST00000262265.10 D5/D6	0.0554429	ENSG00000104872.11	PIH1D1	protein_coding	PIH1D1-201	protein_coding	1197	9	8	High Confidence
ENST00000262288.8	D5/D6	3	1.14784	0.198873	0.547189	ENST00000262288.8 D5/D6	0.0303376	ENSG00000121064.13	SCPEP1	protein_coding	SCPEP1-201	protein_coding	1921	13	12	High Confidence
ENST00000262288.8	F7/D6	3	0.816395	-0.292715	0.612618	ENST00000262288.8 F7/D6	0.034275	ENSG00000121064.13	SCPEP1	protein_coding	SCPEP1-201	protein_coding	1921	13	12	High Confidence
ENST00000262293.9	D5/D6	2	0.664529	-0.589598	0.157212	ENST00000262293.9 D5/D6	0.0373229	ENSG00000068489.13	PRR11	protein_coding	PRR11-201	protein_coding	6226	10	9	Low Confidence
ENST00000262293.9	M8/D6	2	2.67004	1.41543	4.45108	ENST00000262293.9 M8/D6	0.000272986	ENSG00000068489.13	PRR11	protein_coding	PRR11-201	protein_coding	6226	10	9	Low Confidence
ENST00000262302.14	M8/D6	3	0.735492	-0.443991	2.30435	ENST00000262302.14 M8/D6	0.00994106	ENSG00000095906.17	NUBP2	protein_coding	NUBP2-201	protein_coding	1349	7	6	Medium Confidence
ENST00000262352.8	D5/D6	3	0.413204	-1.27558	1.86882	ENST00000262352.8 D5/D6	0.00161818	ENSG00000106688.12	SLC1A1	protein_coding	SLC1A1-201	protein_coding	3698	12	11	Medium Confidence
ENST00000262367.10	F7/D6	3	0.829276	-0.270078	0.11887	ENST00000262367.10 F7/D6	0.0539739	ENSG00000005339.15	CREBBP	protein_coding	CREBBP-201	protein_coding	10790	31	30	High Confidence
ENST00000262370.12	D5/D6	3	0.832705	-0.292266	13.2069	ENST00000262370.12 D5/D6	0.150758	ENSG00000102858.13	MGRN1	protein_coding	MGRN1-201	protein_coding	3930	17	16	Low Confidence
ENST00000262370.12	M8/D6	2	1.14571	0.195813	2.42207	ENST00000262370.12 M8/D6	0.0931789	ENSG00000102858.13	MGRN1	protein_coding	MGRN1-201	protein_coding	3930	17	16	Medium Confidence
ENST00000262375.11	D5/D6	3	1.42005	0.505829	0.882293	ENST00000262375.11 D5/D6	0.0136055	ENSG00000103423.14	DNAJA3	protein_coding	DNAJA3-201	protein_coding	2700	12	11	High Confidence
ENST00000262375.11	M8/D6	3	0.791894	-0.336745	0.923463	ENST00000262375.11 M8/D6	0.0380085	ENSG00000103423.14	DNAJA3	protein_coding	DNAJA3-201	protein_coding	2700	12	11	High Confidence
ENST00000262394.7	F7/D6	3	0.663258	-0.594013	3.3551	ENST00000262394.7 F7/D6	0.00118165	ENSG00000109046.15	WSB1	protein_coding	WSB1-201	protein_coding	5105	9	8	Medium Confidence
ENST00000262395.10	D5/D6	2	0.785696	-0.349193	4.13705	ENST00000262395.10 D5/D6	0.0907323	ENSG00000076604.16	TRAF4	protein_coding	TRAF4-201	protein_coding	2894	7	6	Low Confidence
ENST00000262428.5	D5/D6	4	2.24895	1.1678	2.60626	ENST00000262428.5 D5/D6	0.000101398	ENSG00000103187.8	COTL1	protein_coding	COTL1-201	protein_coding	1842	4	3	Medium Confidence
ENST00000262432.13	F7/D6	2	0.500778	-0.998545	3.30481	ENST00000262432.13 F7/D6	0.000618854	ENSG00000165055.16	METTL2B	protein_coding	METTL2B-201	protein_coding	5841	9	8	Medium Confidence
ENST00000262482.11	M8/D6	3	0.791001	-0.339017	2.28896	ENST00000262482.11 M8/D6	0.022158	ENSG00000108523.16	RNF167	protein_coding	RNF167-201	protein_coding	1775	10	9	Medium Confidence
ENST00000262498.8	D5/D6	3	1.19762	0.260061	0.847087	ENST00000262498.8 D5/D6	0.0601397	ENSG00000070761.8	CFAP20	protein_coding	CFAP20-201	protein_coding	1281	6	5	High Confidence
ENST00000262506.8	D5/D6	3	1.5739	0.653879	1.79799	ENST00000262506.8 D5/D6	0.0632447	ENSG00000070770.10	CSNK2A2	protein_coding	CSNK2A2-201	protein_coding	1887	12	11	Medium Confidence
ENST00000262525.6	F7/D6	2	1.49639	0.581483	0.253751	ENST00000262525.6 F7/D6	0.03525	ENSG00000102870.6	ZNF629	protein_coding	ZNF629-201	protein_coding	6083	3	2	Low Confidence
ENST00000262525.6	M8/D6	2	1.69886	0.76442	1.41302	ENST00000262525.6 M8/D6	0.0169866	ENSG00000102870.6	ZNF629	protein_coding	ZNF629-201	protein_coding	6083	3	2	Low Confidence
ENST00000262554.7	F7/D6	3	0.79384	-0.339183	6.35271	ENST00000262554.7 F7/D6	0.133955	ENSG00000090054.16	SPTLC1	protein_coding	SPTLC1-201	protein_coding	2783	15	14	Low Confidence
ENST00000262584.7	D5/D6	3	1.27049	0.344855	1.93024	ENST00000262584.7 D5/D6	0.000246396	ENSG00000161016.18	RPL8	protein_coding	RPL8-201	protein_coding	1041	6	5	Medium Confidence
ENST00000262584.7	F7/D6	3	1.15639	0.209615	0.213451	ENST00000262584.7 F7/D6	0.00965725	ENSG00000161016.18	RPL8	protein_coding	RPL8-201	protein_coding	1041	6	5	High Confidence
ENST00000262584.7	M8/D6	3	0.803193	-0.316215	0.481906	ENST00000262584.7 M8/D6	0.0136029	ENSG00000161016.18	RPL8	protein_coding	RPL8-201	protein_coding	1041	6	5	High Confidence
ENST00000262613.10	M8/D6	2	0.842593	-0.2471	0.323089	ENST00000262613.10 M8/D6	0.150491	ENSG00000109062.12	SLC9A3R1	protein_coding	SLC9A3R1-201	protein_coding	1993	6	5	Low Confidence
ENST00000262651.4	D5/D6	3	2.5505	1.35027	1.88692	ENST00000262651.4 D5/D6	0.0019848	ENSG00000101336.18	HCK	protein_coding	HCK-201	nonsense_mediated_decay	2160	14	13	Medium Confidence
ENST00000262719.10	D5/D6	2	1.53594	0.618039	3.87671	ENST00000262719.10 D5/D6	0.121727	ENSG00000081913.14	PHLPP1	protein_coding	PHLPP1-201	protein_coding	6299	17	16	Low Confidence
ENST00000262719.10	M8/D6	3	1.71609	0.774219	5.72201	ENST00000262719.10 M8/D6	0.016774	ENSG00000081913.14	PHLPP1	protein_coding	PHLPP1-201	protein_coding	6299	17	16	Low Confidence
ENST00000262746.5	M8/D6	2	1.34833	0.430732	2.48275	ENST00000262746.5 M8/D6	0.073794	ENSG00000117450.15	PRDX1	protein_coding	PRDX1-201	protein_coding	1234	6	5	Medium Confidence
ENST00000262764.11	D5/D6	3	1.30934	0.388724	0.886216	ENST00000262764.11 D5/D6	0.0769079	ENSG00000087157.19	PGS1	protein_coding	PGS1-201	protein_coding	2297	10	9	High Confidence
ENST00000262776.8	D5/D6	3	0.354336	-1.49741	2.0215	ENST00000262776.8 D5/D6	0.0213278	ENSG00000108679.13	LGALS3BP	protein_coding	LGALS3BP-201	protein_coding	2202	6	5	Medium Confidence
ENST00000262776.8	F7/D6	3	2.49224	1.3174	0.566488	ENST00000262776.8 F7/D6	0.00179513	ENSG00000108679.13	LGALS3BP	protein_coding	LGALS3BP-201	protein_coding	2202	6	5	High Confidence
ENST00000262776.8	M8/D6	3	2.86318	1.5175	0.898005	ENST00000262776.8 M8/D6	0.000210924	ENSG00000108679.13	LGALS3BP	protein_coding	LGALS3BP-201	protein_coding	2202	6	5	High Confidence
ENST00000262809.9	D5/D6	3	0.721892	-0.470293	1.00616	ENST00000262809.9 D5/D6	0.0091979	ENSG00000105656.13	ELL	protein_coding	ELL-201	protein_coding	3970	12	11	High Confidence
ENST00000262844.10	D5/D6	2	1.33491	0.416726	0.544809	ENST00000262844.10 D5/D6	0.0439446	ENSG00000101935.13	AMMECR1	protein_coding	AMMECR1-201	protein_coding	5350	6	5	Low Confidence
ENST00000262848.6	D5/D6	3	1.63668	0.710661	0.87934	ENST00000262848.6 D5/D6	0.000496049	ENSG00000183943.6	PRKX	protein_coding	PRKX-201	protein_coding	6102	9	8	High Confidence
ENST00000262848.6	F7/D6	3	0.54205	-0.883715	1.21106	ENST00000262848.6 F7/D6	0.00210102	ENSG00000183943.6	PRKX	protein_coding	PRKX-201	protein_coding	6102	9	8	High Confidence
ENST00000262890.8	D5/D6	2	1.35721	0.438657	5.25168	ENST00000262890.8 D5/D6	0.163662	ENSG00000079462.8	PAFAH1B3	protein_coding	PAFAH1B3-201	protein_coding	1054	5	4	Low Confidence
ENST00000262890.8	M8/D6	3	1.30661	0.385034	2.34449	ENST00000262890.8 M8/D6	0.0775093	ENSG00000079462.8	PAFAH1B3	protein_coding	PAFAH1B3-201	protein_coding	1054	5	4	Medium Confidence
ENST00000262942.10	D5/D6	3	0.860122	-0.217484	0.823503	ENST00000262942.10 D5/D6	0.0473537	ENSG00000241685.10	ARPC1A	protein_coding	ARPC1A-201	protein_coding	1582	10	9	High Confidence
ENST00000262942.10	M8/D6	3	0.819142	-0.287842	0.439556	ENST00000262942.10 M8/D6	0.0130211	ENSG00000241685.10	ARPC1A	protein_coding	ARPC1A-201	protein_coding	1582	10	9	High Confidence
ENST00000262947.8	D5/D6	4	0.838145	-0.254801	0.576558	ENST00000262947.8 D5/D6	0.00227778	ENSG00000074842.8	MYDGF	protein_coding	MYDGF-201	protein_coding	990	6	5	High Confidence
ENST00000262947.8	M8/D6	4	0.703143	-0.508121	0.220551	ENST00000262947.8 M8/D6	0.00212502	ENSG00000074842.8	MYDGF	protein_coding	MYDGF-201	protein_coding	990	6	5	High Confidence
ENST00000262958.4	D5/D6	4	0.314703	-1.66994	3.07827	ENST00000262958.4 D5/D6	0.00076261	ENSG00000060558.4	GNA15	protein_coding	GNA15-201	protein_coding	2273	7	6	Medium Confidence
ENST00000262958.4	F7/D6	3	2.03528	1.02477	1.77252	ENST00000262958.4 F7/D6	0.000229008	ENSG00000060558.4	GNA15	protein_coding	GNA15-201	protein_coding	2273	7	6	High Confidence
ENST00000262958.4	M8/D6	4	1.66158	0.732151	1.37551	ENST00000262958.4 M8/D6	0.0010929	ENSG00000060558.4	GNA15	protein_coding	GNA15-201	protein_coding	2273	7	6	High Confidence
ENST00000262960.14	D5/D6	2	1.37213	0.435286	16.9899	ENST00000262960.14 D5/D6	0.0745477	ENSG00000142002.19	DPP9	protein_coding	DPP9-201	protein_coding	4273	22	21	Low Confidence
ENST00000262982.3	D5/D6	3	1.18492	0.244662	0.959076	ENST00000262982.3 D5/D6	0.0736522	ENSG00000124207.17	CSE1L	protein_coding	CSE1L-201	protein_coding	3550	25	24	High Confidence
ENST00000262990.9	D5/D6	3	1.33674	0.418476	1.30966	ENST00000262990.9 D5/D6	0.0104715	ENSG00000109445.11	ZNF330	protein_coding	ZNF330-201	protein_coding	1891	10	9	High Confidence
ENST00000262990.9	M8/D6	3	1.11401	0.155571	1.14043	ENST00000262990.9 M8/D6	0.173175	ENSG00000109445.11	ZNF330	protein_coding	ZNF330-201	protein_coding	1891	10	9	High Confidence
ENST00000262992.9	F7/D6	2	1.42757	0.511323	5.56562	ENST00000262992.9 F7/D6	0.0504921	ENSG00000109452.13	INPP4B	protein_coding	INPP4B-201	protein_coding	8743	26	25	Low Confidence
ENST00000263025.9	D5/D6	2	0.836416	-0.257724	0.477124	ENST00000263025.9 D5/D6	0.228189	ENSG00000102882.12	MAPK3	protein_coding	MAPK3-201	protein_coding	1787	9	8	Low Confidence
ENST00000263026.10	M8/D6	2	1.38883	0.47381	0.90022	ENST00000263026.10 M8/D6	0.0252479	ENSG00000103319.12	EEF2K	protein_coding	EEF2K-201	protein_coding	7398	18	17	Low Confidence
ENST00000263035.9	F7/D6	3	1.22118	0.288119	1.04843	ENST00000263035.9 F7/D6	0.060183	ENSG00000181192.12	DHTKD1	protein_coding	DHTKD1-201	protein_coding	5173	17	16	High Confidence
ENST00000263038.9	M8/D6	3	0.730423	-0.453231	0.496615	ENST00000263038.9 M8/D6	0.00839121	ENSG00000107537.14	PHYH	protein_coding	PHYH-201	protein_coding	1541	9	8	High Confidence
ENST00000263056.6	F7/D6	2	1.55771	0.637095	5.67847	ENST00000263056.6 F7/D6	0.0285624	ENSG00000107968.10	MAP3K8	protein_coding	MAP3K8-201	protein_coding	2850	9	8	Low Confidence
ENST00000263063.9	D5/D6	3	1.43847	0.523827	2.20388	ENST00000263063.9 D5/D6	0.00056138	ENSG00000107951.15	MTPAP	protein_coding	MTPAP-201	protein_coding	5560	9	8	Medium Confidence
ENST00000263084.7	D5/D6	3	0.758606	-0.405631	6.93145	ENST00000263084.7 D5/D6	0.151398	ENSG00000108963.19	DPH1	protein_coding	DPH1-202	nonsense_mediated_decay	1827	3	2	Low Confidence
ENST00000263092.11	D5/D6	2	1.28434	0.360593	2.45066	ENST00000263092.11 D5/D6	0.0332915	ENSG00000127804.13	METTL16	protein_coding	METTL16-201	protein_coding	5740	10	9	Medium Confidence
ENST00000263097.9	M8/D6	3	1.38869	0.471571	3.88868	ENST00000263097.9 M8/D6	0.0228473	ENSG00000064666.15	CNN2	protein_coding	CNN2-201	protein_coding	2149	7	6	Low Confidence
ENST00000263168.4	F7/D6	4	0.854458	-0.226934	0.273469	ENST00000263168.4 F7/D6	0.0403178	ENSG00000116489.13	CAPZA1	protein_coding	CAPZA1-201	protein_coding	2358	10	9	High Confidence
ENST00000263181.7	M8/D6	3	2.58187	1.36827	0.99554	ENST00000263181.7 M8/D6	0.00109632	ENSG00000121621.7	KIF18A	protein_coding	KIF18A-201	protein_coding	3417	17	16	High Confidence
ENST00000263201.7	M8/D6	2	1.41718	0.502919	1.21907	ENST00000263201.7 M8/D6	0.20116	ENSG00000093009.11	CDC45	protein_coding	CDC45-201	protein_coding	1879	19	18	Low Confidence
ENST00000263202.15	D5/D6	3	0.827394	-0.273452	0.820699	ENST00000263202.15 D5/D6	0.0100512	ENSG00000070010.19	UFD1	protein_coding	UFD1-201	protein_coding	1791	12	11	High Confidence
ENST00000263205.11	F7/D6	3	1.54508	0.627528	1.04412	ENST00000263205.11 F7/D6	0.0331196	ENSG00000099917.17	MED15	protein_coding	MED15-201	protein_coding	3351	18	17	High Confidence
ENST00000263212.10	D5/D6	2	1.41243	0.498156	0.534989	ENST00000263212.10 D5/D6	0.0811428	ENSG00000100034.14	PPM1F	protein_coding	PPM1F-201	protein_coding	5149	8	7	Low Confidence
ENST00000263239.7	D5/D6	3	1.22641	0.293233	2.91582	ENST00000263239.7 D5/D6	0.00138092	ENSG00000088205.13	DDX18	protein_coding	DDX18-201	protein_coding	3753	14	13	Medium Confidence
ENST00000263245.10	D5/D6	3	0.764034	-0.38835	0.633656	ENST00000263245.10 D5/D6	0.00825674	ENSG00000242247.11	ARFGAP3	protein_coding	ARFGAP3-201	protein_coding	2728	16	15	High Confidence
ENST00000263245.10	F7/D6	2	1.18754	0.247912	0.981449	ENST00000263245.10 F7/D6	0.0357938	ENSG00000242247.11	ARFGAP3	protein_coding	ARFGAP3-201	protein_coding	2728	16	15	Low Confidence
ENST00000263245.10	M8/D6	3	0.809382	-0.305175	0.68661	ENST00000263245.10 M8/D6	0.00689991	ENSG00000242247.11	ARFGAP3	protein_coding	ARFGAP3-201	protein_coding	2728	16	15	High Confidence
ENST00000263246.8	M8/D6	4	1.38266	0.466911	1.58092	ENST00000263246.8 M8/D6	0.0181862	ENSG00000100266.19	PACSIN2	protein_coding	PACSIN2-201	protein_coding	3251	11	10	High Confidence
ENST00000263256.7	F7/D6	3	0.781108	-0.357186	2.34256	ENST00000263256.7 F7/D6	0.00448633	ENSG00000100418.8	DESI1	protein_coding	DESI1-201	protein_coding	3780	6	5	Medium Confidence
ENST00000263256.7	M8/D6	3	0.874542	-0.194735	3.0687	ENST00000263256.7 M8/D6	0.0314961	ENSG00000100418.8	DESI1	protein_coding	DESI1-201	protein_coding	3780	6	5	Medium Confidence
ENST00000263268.11	D5/D6	2	0.840099	-0.252441	3.85385	ENST00000263268.11 D5/D6	0.0582657	ENSG00000118242.16	MREG	protein_coding	MREG-201	protein_coding	3148	5	4	Low Confidence
ENST00000263268.11	M8/D6	2	0.628722	-0.670046	2.73325	ENST00000263268.11 M8/D6	0.00102443	ENSG00000118242.16	MREG	protein_coding	MREG-201	protein_coding	3148	5	4	Medium Confidence
ENST00000263270.11	D5/D6	3	0.805217	-0.31263	0.736271	ENST00000263270.11 D5/D6	0.0234374	ENSG00000042753.12	AP2S1	protein_coding	AP2S1-201	protein_coding	789	5	4	High Confidence
ENST00000263270.11	M8/D6	2	1.05016	0.07061	0.152537	ENST00000263270.11 M8/D6	0.0677688	ENSG00000042753.12	AP2S1	protein_coding	AP2S1-201	protein_coding	789	5	4	Low Confidence
ENST00000263278.9	M8/D6	3	1.63815	0.690712	12.5355	ENST00000263278.9 M8/D6	0.0620662	ENSG00000087076.9	HSD17B14	protein_coding	HSD17B14-201	protein_coding	1050	9	8	Low Confidence
ENST00000263285.11	D5/D6	4	1.64891	0.721281	1.03435	ENST00000263285.11 D5/D6	0.00807028	ENSG00000122224.18	LY9	protein_coding	LY9-201	protein_coding	2421	10	9	High Confidence
ENST00000263339.4	F7/D6	2	0.535559	-0.902432	4.63422	ENST00000263339.4 F7/D6	0.021258	ENSG00000115008.6	IL1A	protein_coding	IL1A-201	protein_coding	2017	7	6	Low Confidence
ENST00000263339.4	M8/D6	2	0.72908	-0.455965	1.25923	ENST00000263339.4 M8/D6	0.045542	ENSG00000115008.6	IL1A	protein_coding	IL1A-201	protein_coding	2017	7	6	Low Confidence
ENST00000263368.9	D5/D6	3	1.41191	0.497611	0.509118	ENST00000263368.9 D5/D6	0.00182665	ENSG00000090013.11	BLVRB	protein_coding	BLVRB-201	protein_coding	799	5	4	High Confidence
ENST00000263368.9	F7/D6	3	0.818667	-0.288696	0.55966	ENST00000263368.9 F7/D6	0.0422123	ENSG00000090013.11	BLVRB	protein_coding	BLVRB-201	protein_coding	799	5	4	High Confidence
ENST00000263368.9	M8/D6	3	1.39309	0.477978	1.47351	ENST00000263368.9 M8/D6	0.00554442	ENSG00000090013.11	BLVRB	protein_coding	BLVRB-201	protein_coding	799	5	4	High Confidence
ENST00000263379.4	D5/D6	4	1.39244	0.474824	3.67291	ENST00000263379.4 D5/D6	0.0349741	ENSG00000104998.4	IL27RA	protein_coding	IL27RA-201	protein_coding	2950	14	13	Medium Confidence
ENST00000263379.4	F7/D6	3	0.831528	-0.267266	2.7899	ENST00000263379.4 F7/D6	0.0988126	ENSG00000104998.4	IL27RA	protein_coding	IL27RA-201	protein_coding	2950	14	13	Medium Confidence
ENST00000263382.8	M8/D6	4	1.91557	0.936613	2.3479	ENST00000263382.8 M8/D6	0.00179178	ENSG00000105011.9	ASF1B	protein_coding	ASF1B-201	protein_coding	1689	4	3	Medium Confidence
ENST00000263384.12	D5/D6	3	0.897469	-0.156318	1.31946	ENST00000263384.12 D5/D6	0.0464061	ENSG00000105058.12	FAM32A	protein_coding	FAM32A-201	protein_coding	1463	4	3	High Confidence
ENST00000263398.11	D5/D6	3	0.888987	-0.170069	1.44472	ENST00000263398.11 D5/D6	0.0482898	ENSG00000026508.21	CD44	protein_coding	CD44-201	protein_coding	4288	9	8	High Confidence
ENST00000263398.11	M8/D6	3	1.55296	0.634997	0.40981	ENST00000263398.11 M8/D6	8.94811e-06	ENSG00000026508.21	CD44	protein_coding	CD44-201	protein_coding	4288	9	8	High Confidence
ENST00000263464.9	D5/D6	2	0.455425	-1.13474	0.530523	ENST00000263464.9 D5/D6	3.93053e-07	ENSG00000023445.16	BIRC3	protein_coding	BIRC3-201	protein_coding	6877	9	8	Low Confidence
ENST00000263464.9	F7/D6	2	1.13315	0.180336	0.348939	ENST00000263464.9 F7/D6	0.0259778	ENSG00000023445.16	BIRC3	protein_coding	BIRC3-201	protein_coding	6877	9	8	Low Confidence
ENST00000263464.9	M8/D6	3	0.710761	-0.492639	0.723592	ENST00000263464.9 M8/D6	0.000330609	ENSG00000023445.16	BIRC3	protein_coding	BIRC3-201	protein_coding	6877	9	8	High Confidence
ENST00000263620.8	D5/D6	2	0.800234	-0.321512	0.283285	ENST00000263620.8 D5/D6	0.0666062	ENSG00000116017.11	ARID3A	protein_coding	ARID3A-201	protein_coding	5948	9	8	Low Confidence
ENST00000263635.8	D5/D6	3	3.47502	1.79638	2.11979	ENST00000263635.8 D5/D6	0.000185104	ENSG00000115183.15	TANC1	protein_coding	TANC1-201	protein_coding	7501	27	26	Medium Confidence
ENST00000263635.8	M8/D6	3	1.88261	0.907278	6.05559	ENST00000263635.8 M8/D6	0.0128129	ENSG00000115183.15	TANC1	protein_coding	TANC1-201	protein_coding	7501	27	26	Low Confidence
ENST00000263636.5	D5/D6	2	1.10381	0.142483	0.235043	ENST00000263636.5 D5/D6	0.0827974	ENSG00000054219.11	LY75	protein_coding	LY75-201	protein_coding	6932	35	34	Low Confidence
ENST00000263636.5	M8/D6	3	0.793045	-0.335029	1.87825	ENST00000263636.5 M8/D6	0.00120741	ENSG00000054219.11	LY75	protein_coding	LY75-201	protein_coding	6932	35	34	Medium Confidence
ENST00000263657.7	D5/D6	4	1.4583	0.54339	2.0467	ENST00000263657.7 D5/D6	0.0128255	ENSG00000115946.8	PNO1	protein_coding	PNO1-201	protein_coding	2242	7	6	Medium Confidence
ENST00000263663.10	M8/D6	3	1.5225	0.602887	5.03921	ENST00000263663.10 M8/D6	0.0150728	ENSG00000115750.17	TAF1B	protein_coding	TAF1B-201	protein_coding	2267	15	14	Low Confidence
ENST00000263672.11	M8/D6	4	0.744844	-0.428501	4.12308	ENST00000263672.11 M8/D6	0.00127197	ENSG00000118363.13	SPCS2	protein_coding	SPCS2-201	protein_coding	2691	5	4	Low Confidence
ENST00000263694.9	D5/D6	3	1.28191	0.358155	0.988177	ENST00000263694.9 D5/D6	0.00727292	ENSG00000060688.13	SNRNP40	protein_coding	SNRNP40-201	protein_coding	1615	10	9	High Confidence
ENST00000263697.6	D5/D6	3	1.16244	0.216974	1.12487	ENST00000263697.6 D5/D6	0.0112475	ENSG00000126698.11	DNAJC8	protein_coding	DNAJC8-201	protein_coding	1763	9	8	High Confidence
ENST00000263697.6	F7/D6	2	0.910911	-0.134618	0.0164609	ENST00000263697.6 F7/D6	0.075584	ENSG00000126698.11	DNAJC8	protein_coding	DNAJC8-201	protein_coding	1763	9	8	Low Confidence
ENST00000263776.9	M8/D6	3	0.476487	-1.07414	5.70705	ENST00000263776.9 M8/D6	0.0117835	ENSG00000110455.14	ACCS	protein_coding	ACCS-201	protein_coding	2383	15	14	Low Confidence
ENST00000263780.9	D5/D6	2	1.1475	0.198488	0.242345	ENST00000263780.9 D5/D6	0.0322926	ENSG00000083937.10	CHMP2B	protein_coding	CHMP2B-201	protein_coding	2590	6	5	Low Confidence
ENST00000263780.9	M8/D6	2	1.18951	0.250356	0.334032	ENST00000263780.9 M8/D6	0.0442522	ENSG00000083937.10	CHMP2B	protein_coding	CHMP2B-201	protein_coding	2590	6	5	Low Confidence
ENST00000263857.11	D5/D6	3	1.40949	0.494251	2.50707	ENST00000263857.11 D5/D6	0.0038559	ENSG00000068654.17	POLR1A	protein_coding	POLR1A-201	protein_coding	12480	34	33	Medium Confidence
ENST00000263864.10	D5/D6	3	0.913583	-0.13053	0.975659	ENST00000263864.10 D5/D6	0.0564432	ENSG00000118640.11	VAMP8	protein_coding	VAMP8-201	protein_coding	679	3	2	High Confidence
ENST00000263867.9	D5/D6	4	1.78821	0.837409	2.27991	ENST00000263867.9 D5/D6	9.32085e-06	ENSG00000042493.16	CAPG	protein_coding	CAPG-201	protein_coding	1250	10	9	Medium Confidence
ENST00000263867.9	M8/D6	3	1.89801	0.923588	2.48439	ENST00000263867.9 M8/D6	1.12566e-05	ENSG00000042493.16	CAPG	protein_coding	CAPG-201	protein_coding	1250	10	9	Medium Confidence
ENST00000263904.5	D5/D6	3	0.7338	-0.448423	3.57742	ENST00000263904.5 D5/D6	0.0368101	ENSG00000115145.10	STAM2	protein_coding	STAM2-201	protein_coding	5472	14	13	Medium Confidence
ENST00000263904.5	M8/D6	2	1.27817	0.353845	1.79252	ENST00000263904.5 M8/D6	0.0684294	ENSG00000115145.10	STAM2	protein_coding	STAM2-201	protein_coding	5472	14	13	Medium Confidence
ENST00000263932.7	D5/D6	3	0.686956	-0.543651	3.62197	ENST00000263932.7 D5/D6	0.0110144	ENSG00000120949.15	TNFRSF8	protein_coding	TNFRSF8-201	protein_coding	3760	15	14	Medium Confidence
ENST00000263932.7	F7/D6	3	1.34843	0.416832	9.81128	ENST00000263932.7 F7/D6	0.0143521	ENSG00000120949.15	TNFRSF8	protein_coding	TNFRSF8-201	protein_coding	3760	15	14	Low Confidence
ENST00000263966.8	D5/D6	2	1.26216	0.335819	0.988595	ENST00000263966.8 D5/D6	0.0457419	ENSG00000058056.10	USP13	protein_coding	USP13-201	protein_coding	8038	21	20	Low Confidence
ENST00000263967.4	D5/D6	3	1.42894	0.511826	4.71336	ENST00000263967.4 D5/D6	0.0152601	ENSG00000121879.6	PIK3CA	protein_coding	PIK3CA-201	protein_coding	9259	21	20	Low Confidence
ENST00000264001.9	F7/D6	3	0.720026	-0.473972	0.801826	ENST00000264001.9 F7/D6	0.0305481	ENSG00000217555.13	CKLF	protein_coding	CKLF-201	protein_coding	656	4	3	High Confidence
ENST00000264020.6	D5/D6	2	0.583437	-0.777389	0.711962	ENST00000264020.6 D5/D6	0.0337571	ENSG00000118096.10	IFT46	protein_coding	IFT46-201	protein_coding	1819	13	12	Low Confidence
ENST00000264025.8	M8/D6	2	0.527539	-0.922666	0.446639	ENST00000264025.8 M8/D6	0.0789186	ENSG00000110400.11	NECTIN1	protein_coding	NECTIN1-201	protein_coding	5956	6	5	Low Confidence
ENST00000264027.9	M8/D6	2	1.21949	0.285876	2.34818	ENST00000264027.9 M8/D6	0.0175178	ENSG00000109929.10	SC5D	protein_coding	SC5D-201	protein_coding	6854	5	4	Medium Confidence
ENST00000264028.5	D5/D6	2	0.982087	-0.0261507	1.00478	ENST00000264028.5 D5/D6	0.336595	ENSG00000095139.15	ARCN1	protein_coding	ARCN1-201	protein_coding	3994	10	9	Low Confidence
ENST00000264033.6	M8/D6	2	1.37388	0.458231	0.561167	ENST00000264033.6 M8/D6	0.0325952	ENSG00000110395.8	CBL	protein_coding	CBL-201	protein_coding	11168	16	15	Low Confidence
ENST00000264052.9	D5/D6	2	1.1637	0.217069	4.78022	ENST00000264052.9 D5/D6	0.375986	ENSG00000067066.17	SP100	protein_coding	SP100-201	protein_coding	3882	25	24	Low Confidence
ENST00000264052.9	F7/D6	2	0.749839	-0.415873	2.70181	ENST00000264052.9 F7/D6	0.140215	ENSG00000067066.17	SP100	protein_coding	SP100-201	protein_coding	3882	25	24	Medium Confidence
ENST00000264071.7	F7/D6	3	1.96102	0.971292	1.46363	ENST00000264071.7 F7/D6	0.0178198	ENSG00000104833.12	TUBB4A	protein_coding	TUBB4A-201	protein_coding	2277	4	3	High Confidence
ENST00000264110.7	D5/D6	2	0.905013	-0.148572	7.95807	ENST00000264110.7 D5/D6	0.155514	ENSG00000115966.18	ATF2	protein_coding	ATF2-201	protein_coding	4164	14	13	Low Confidence
ENST00000264156.3	D5/D6	4	1.54208	0.624619	1.08392	ENST00000264156.3 D5/D6	0.000332558	ENSG00000076003.5	MCM6	protein_coding	MCM6-201	protein_coding	3753	17	16	High Confidence
ENST00000264161.9	M8/D6	2	0.897911	-0.155405	0.824439	ENST00000264161.9 M8/D6	0.039338	ENSG00000115866.11	DARS1	protein_coding	DARS1-201	protein_coding	3099	16	15	Low Confidence
ENST00000264170.9	D5/D6	3	0.454929	-1.13709	2.37171	ENST00000264170.9 D5/D6	4.70153e-05	ENSG00000115919.15	KYNU	protein_coding	KYNU-201	protein_coding	15151	14	13	Medium Confidence
ENST00000264170.9	F7/D6	2	0.737686	-0.43906	1.3867	ENST00000264170.9 F7/D6	0.00620101	ENSG00000115919.15	KYNU	protein_coding	KYNU-201	protein_coding	15151	14	13	Low Confidence
ENST00000264192.8	D5/D6	3	0.670508	-0.577081	1.68589	ENST00000264192.8 D5/D6	9.7606e-05	ENSG00000115165.10	CYTIP	protein_coding	CYTIP-201	protein_coding	2207	8	7	High Confidence
ENST00000264192.8	F7/D6	3	0.835296	-0.259813	1.09506	ENST00000264192.8 F7/D6	0.0133428	ENSG00000115165.10	CYTIP	protein_coding	CYTIP-201	protein_coding	2207	8	7	High Confidence
ENST00000264192.8	M8/D6	3	0.742134	-0.430447	1.17734	ENST00000264192.8 M8/D6	0.000488526	ENSG00000115165.10	CYTIP	protein_coding	CYTIP-201	protein_coding	2207	8	7	High Confidence
ENST00000264198.5	M8/D6	2	0.789883	-0.340326	0.712787	ENST00000264198.5 M8/D6	0.0568666	ENSG00000090432.7	MUL1	protein_coding	MUL1-201	protein_coding	2428	4	3	Low Confidence
ENST00000264220.6	D5/D6	4	1.38611	0.47068	1.28651	ENST00000264220.6 D5/D6	0.019956	ENSG00000128059.8	PPAT	protein_coding	PPAT-201	protein_coding	3682	11	10	High Confidence
ENST00000264233.6	M8/D6	3	2.0672	1.04507	4.29517	ENST00000264233.6 M8/D6	0.0173626	ENSG00000051341.15	POLQ	protein_coding	POLQ-201	protein_coding	8757	30	29	Low Confidence
ENST00000264245.9	D5/D6	3	0.574158	-0.802444	3.72964	ENST00000264245.9 D5/D6	0.000649971	ENSG00000031081.11	ARHGAP31	protein_coding	ARHGAP31-201	protein_coding	9307	12	11	Low Confidence
ENST00000264245.9	F7/D6	2	0.850396	-0.233877	1.07093	ENST00000264245.9 F7/D6	0.129956	ENSG00000031081.11	ARHGAP31	protein_coding	ARHGAP31-201	protein_coding	9307	12	11	Low Confidence
ENST00000264245.9	M8/D6	2	0.808924	-0.306037	1.25414	ENST00000264245.9 M8/D6	0.0517977	ENSG00000031081.11	ARHGAP31	protein_coding	ARHGAP31-201	protein_coding	9307	12	11	Low Confidence
ENST00000264246.8	D5/D6	4	0.484315	-1.04868	3.48701	ENST00000264246.8 D5/D6	0.000255684	ENSG00000121594.12	CD80	protein_coding	CD80-201	protein_coding	2737	7	6	Medium Confidence
ENST00000264246.8	M8/D6	4	0.630552	-0.665486	0.89845	ENST00000264246.8 M8/D6	0.00167267	ENSG00000121594.12	CD80	protein_coding	CD80-201	protein_coding	2737	7	6	High Confidence
ENST00000264255.8	D5/D6	2	1.15383	0.206367	0.959027	ENST00000264255.8 D5/D6	0.143605	ENSG00000115514.12	TXNDC9	protein_coding	TXNDC9-201	protein_coding	1508	5	4	Low Confidence
ENST00000264258.8	D5/D6	4	1.27441	0.346725	3.87393	ENST00000264258.8 D5/D6	0.00467775	ENSG00000071082.11	RPL31	protein_coding	RPL31-201	protein_coding	1291	5	4	Low Confidence
ENST00000264258.8	F7/D6	4	1.17222	0.227706	2.70018	ENST00000264258.8 F7/D6	0.0179062	ENSG00000071082.11	RPL31	protein_coding	RPL31-201	protein_coding	1291	5	4	Medium Confidence
ENST00000264265.4	D5/D6	3	0.888411	-0.170714	0.301533	ENST00000264265.4 D5/D6	0.0962659	ENSG00000079257.8	LXN	protein_coding	LXN-201	protein_coding	1071	6	5	High Confidence
ENST00000264279.10	D5/D6	4	1.29209	0.369054	1.7445	ENST00000264279.10 D5/D6	0.000763497	ENSG00000055044.11	NOP58	protein_coding	NOP58-201	protein_coding	1994	15	14	High Confidence
ENST00000264279.10	F7/D6	2	0.872783	-0.196321	0.462603	ENST00000264279.10 F7/D6	0.0462554	ENSG00000055044.11	NOP58	protein_coding	NOP58-201	protein_coding	1994	15	14	Low Confidence
ENST00000264279.10	M8/D6	4	0.829435	-0.270596	1.94095	ENST00000264279.10 M8/D6	0.00301835	ENSG00000055044.11	NOP58	protein_coding	NOP58-201	protein_coding	1994	15	14	Medium Confidence
ENST00000264335.13	F7/D6	3	0.918565	-0.123415	2.47413	ENST00000264335.13 F7/D6	0.0760984	ENSG00000108953.17	YWHAE	protein_coding	YWHAE-201	protein_coding	2052	6	5	Medium Confidence
ENST00000264346.12	D5/D6	3	0.596977	-0.744724	1.8169	ENST00000264346.12 D5/D6	8.60517e-05	ENSG00000138642.16	HERC6	protein_coding	HERC6-201	protein_coding	3776	23	22	Medium Confidence
ENST00000264346.12	M8/D6	3	0.799603	-0.324957	4.05288	ENST00000264346.12 M8/D6	0.0992974	ENSG00000138642.16	HERC6	protein_coding	HERC6-201	protein_coding	3776	23	22	Low Confidence
ENST00000264350.8	F7/D6	2	0.936204	-0.0951079	0.205509	ENST00000264350.8 F7/D6	0.115965	ENSG00000138646.9	HERC5	protein_coding	HERC5-201	protein_coding	3511	23	22	Low Confidence
ENST00000264380.9	M8/D6	3	0.733554	-0.447183	1.05279	ENST00000264380.9 M8/D6	0.0252818	ENSG00000115020.17	PIKFYVE	protein_coding	PIKFYVE-201	protein_coding	9908	42	41	High Confidence
ENST00000264409.5	D5/D6	3	1.57592	0.655671	1.90385	ENST00000264409.5 D5/D6	0.0625068	ENSG00000138678.11	GPAT3	protein_coding	GPAT3-201	protein_coding	2928	12	11	Medium Confidence
ENST00000264409.5	M8/D6	3	2.90184	1.53517	3.54136	ENST00000264409.5 M8/D6	0.000112224	ENSG00000138678.11	GPAT3	protein_coding	GPAT3-201	protein_coding	2928	12	11	Medium Confidence
ENST00000264424.13	D5/D6	3	0.427462	-1.22623	0.821809	ENST00000264424.13 D5/D6	0.000338714	ENSG00000061918.14	GUCY1B1	protein_coding	GUCY1B1-201	protein_coding	3382	14	13	High Confidence
ENST00000264424.13	F7/D6	3	1.92766	0.946818	0.472457	ENST00000264424.13 F7/D6	0.000237119	ENSG00000061918.14	GUCY1B1	protein_coding	GUCY1B1-201	protein_coding	3382	14	13	High Confidence
ENST00000264424.13	M8/D6	3	1.5653	0.646305	0.9791	ENST00000264424.13 M8/D6	0.00231104	ENSG00000061918.14	GUCY1B1	protein_coding	GUCY1B1-201	protein_coding	3382	14	13	High Confidence
ENST00000264433.11	D5/D6	3	0.546333	-0.87337	2.91338	ENST00000264433.11 D5/D6	0.000198015	ENSG00000052795.13	FNIP2	protein_coding	FNIP2-201	protein_coding	7038	17	16	Medium Confidence
ENST00000264433.11	F7/D6	3	0.735988	-0.442466	1.23689	ENST00000264433.11 F7/D6	0.0290598	ENSG00000052795.13	FNIP2	protein_coding	FNIP2-201	protein_coding	7038	17	16	High Confidence
ENST00000264433.11	M8/D6	3	0.704504	-0.505789	1.81208	ENST00000264433.11 M8/D6	0.00837515	ENSG00000052795.13	FNIP2	protein_coding	FNIP2-201	protein_coding	7038	17	16	Medium Confidence
ENST00000264444.7	D5/D6	2	1.66106	0.732027	1.06011	ENST00000264444.7 D5/D6	0.0141044	ENSG00000059728.11	MXD1	protein_coding	MXD1-201	protein_coding	5549	6	5	Low Confidence
ENST00000264538.4	F7/D6	4	2.25055	1.16796	3.20006	ENST00000264538.4 F7/D6	0.000158056	ENSG00000114446.5	IFT57	protein_coding	IFT57-201	protein_coding	3057	11	10	Medium Confidence
ENST00000264538.4	M8/D6	3	0.188337	-2.41357	5.96811	ENST00000264538.4 M8/D6	4.16173e-05	ENSG00000114446.5	IFT57	protein_coding	IFT57-201	protein_coding	3057	11	10	Low Confidence
ENST00000264596.4	M8/D6	3	3.43276	1.77911	1.33815	ENST00000264596.4 M8/D6	0.0032277	ENSG00000109674.4	NEIL3	protein_coding	NEIL3-201	protein_coding	2363	10	9	High Confidence
ENST00000264638.9	D5/D6	2	0.756353	-0.403899	3.77866	ENST00000264638.9 D5/D6	0.282832	ENSG00000108797.12	CNTNAP1	protein_coding	CNTNAP1-201	protein_coding	5537	24	23	Low Confidence
ENST00000264649.10	D5/D6	3	1.52301	0.606559	1.59234	ENST00000264649.10 D5/D6	0.0123039	ENSG00000033627.18	ATP6V0A1	protein_coding	ATP6V0A1-201	protein_coding	4110	21	20	High Confidence
ENST00000264657.10	D5/D6	2	0.842984	-0.247103	3.07223	ENST00000264657.10 D5/D6	0.220555	ENSG00000168610.16	STAT3	protein_coding	STAT3-201	protein_coding	4921	24	23	Medium Confidence
ENST00000264657.10	M8/D6	3	0.812498	-0.299728	1.07005	ENST00000264657.10 M8/D6	0.0461908	ENSG00000168610.16	STAT3	protein_coding	STAT3-201	protein_coding	4921	24	23	High Confidence
ENST00000264670.11	D5/D6	3	1.19726	0.259372	1.57381	ENST00000264670.11 D5/D6	0.0538104	ENSG00000037474.15	NSUN2	protein_coding	NSUN2-201	protein_coding	3056	19	18	High Confidence
ENST00000264705.9	D5/D6	3	1.53068	0.611332	4.49384	ENST00000264705.9 D5/D6	0.00885627	ENSG00000084774.14	CAD	protein_coding	CAD-201	protein_coding	7286	44	43	Low Confidence
ENST00000264705.9	M8/D6	2	0.866294	-0.207147	1.01725	ENST00000264705.9 M8/D6	0.0686624	ENSG00000084774.14	CAD	protein_coding	CAD-201	protein_coding	7286	44	43	Low Confidence
ENST00000264832.8	D5/D6	3	0.523658	-0.93406	2.30652	ENST00000264832.8 D5/D6	1.59632e-06	ENSG00000090339.9	ICAM1	protein_coding	ICAM1-201	protein_coding	2967	7	6	Medium Confidence
ENST00000264832.8	M8/D6	2	0.813494	-0.298283	2.59638	ENST00000264832.8 M8/D6	0.292668	ENSG00000090339.9	ICAM1	protein_coding	ICAM1-201	protein_coding	2967	7	6	Medium Confidence
ENST00000264848.10	F7/D6	4	1.80498	0.851413	1.62764	ENST00000264848.10 F7/D6	0.028063	ENSG00000114529.13	C3orf52	protein_coding	C3orf52-201	protein_coding	2237	6	5	High Confidence
ENST00000264848.10	M8/D6	2	0.620367	-0.690008	4.08006	ENST00000264848.10 M8/D6	0.157142	ENSG00000114529.13	C3orf52	protein_coding	C3orf52-201	protein_coding	2237	6	5	Low Confidence
ENST00000264852.9	M8/D6	2	0.852486	-0.230704	2.50192	ENST00000264852.9 M8/D6	0.0635331	ENSG00000072858.11	SIDT1	protein_coding	SIDT1-201	protein_coding	4818	25	24	Medium Confidence
ENST00000264864.8	F7/D6	3	0.691177	-0.53302	1.0115	ENST00000264864.8 F7/D6	0.0247283	ENSG00000038210.14	PI4K2B	protein_coding	PI4K2B-201	protein_coding	3594	10	9	High Confidence
ENST00000264864.8	M8/D6	3	0.798239	-0.325135	0.432861	ENST00000264864.8 M8/D6	0.11066	ENSG00000038210.14	PI4K2B	protein_coding	PI4K2B-201	protein_coding	3594	10	9	High Confidence
ENST00000264870.8	F7/D6	4	0.437095	-1.19449	1.53888	ENST00000264870.8 F7/D6	0.000552002	ENSG00000124491.16	F13A1	protein_coding	F13A1-201	protein_coding	3828	15	14	High Confidence
ENST00000264870.8	M8/D6	4	2.31496	1.21087	0.744642	ENST00000264870.8 M8/D6	0.000109364	ENSG00000124491.16	F13A1	protein_coding	F13A1-201	protein_coding	3828	15	14	High Confidence
ENST00000264893.11	D5/D6	3	1.56439	0.64489	2.21181	ENST00000264893.11 D5/D6	0.000374124	ENSG00000138758.12	SEPTIN11	protein_coding	SEPTIN11-201	protein_coding	5545	10	9	Medium Confidence
ENST00000264893.11	F7/D6	3	1.16694	0.222406	1.50922	ENST00000264893.11 F7/D6	0.0522017	ENSG00000138758.12	SEPTIN11	protein_coding	SEPTIN11-201	protein_coding	5545	10	9	High Confidence
ENST00000264896.8	D5/D6	3	0.389509	-1.3614	2.77279	ENST00000264896.8 D5/D6	1.64619e-05	ENSG00000138760.11	SCARB2	protein_coding	SCARB2-201	protein_coding	4694	12	11	Medium Confidence
ENST00000264896.8	F7/D6	3	0.594719	-0.749752	0.462825	ENST00000264896.8 F7/D6	0.00197958	ENSG00000138760.11	SCARB2	protein_coding	SCARB2-201	protein_coding	4694	12	11	High Confidence
ENST00000264896.8	M8/D6	3	0.629267	-0.66899	2.27127	ENST00000264896.8 M8/D6	0.00150873	ENSG00000138760.11	SCARB2	protein_coding	SCARB2-201	protein_coding	4694	12	11	Medium Confidence
ENST00000264908.11	F7/D6	3	0.312749	-1.67724	1.48831	ENST00000264908.11 F7/D6	0.0129719	ENSG00000138772.13	ANXA3	protein_coding	ANXA3-201	protein_coding	1432	13	12	High Confidence
ENST00000264908.11	M8/D6	4	1.79234	0.841141	1.78277	ENST00000264908.11 M8/D6	0.0320912	ENSG00000138772.13	ANXA3	protein_coding	ANXA3-201	protein_coding	1432	13	12	High Confidence
ENST00000264914.10	M8/D6	2	0.868595	-0.20801	8.11378	ENST00000264914.10 M8/D6	0.115972	ENSG00000113273.17	ARSB	protein_coding	ARSB-201	protein_coding	4852	8	7	Low Confidence
ENST00000264930.10	D5/D6	3	2.49307	1.31767	1.31787	ENST00000264930.10 D5/D6	0.000571309	ENSG00000113504.21	SLC12A7	protein_coding	SLC12A7-201	protein_coding	5300	24	23	High Confidence
ENST00000264930.10	F7/D6	3	2.44237	1.28732	2.5655	ENST00000264930.10 F7/D6	0.001004	ENSG00000113504.21	SLC12A7	protein_coding	SLC12A7-201	protein_coding	5300	24	23	Medium Confidence
ENST00000264933.9	D5/D6	4	1.14903	0.19945	2.09558	ENST00000264933.9 D5/D6	0.12514	ENSG00000249915.9	PDCD6	protein_coding	PDCD6-201	protein_coding	1110	6	5	Medium Confidence
ENST00000264954.5	D5/D6	2	1.0767	0.10485	4.95144	ENST00000264954.5 D5/D6	0.12404	ENSG00000109519.14	GRPEL1	protein_coding	GRPEL1-201	protein_coding	2653	4	3	Low Confidence
ENST00000264954.5	M8/D6	3	0.820428	-0.286261	2.23249	ENST00000264954.5 M8/D6	0.0737432	ENSG00000109519.14	GRPEL1	protein_coding	GRPEL1-201	protein_coding	2653	4	3	Medium Confidence
ENST00000264995.8	D5/D6	3	1.25439	0.326951	0.47409	ENST00000264995.8 D5/D6	0.00655986	ENSG00000114686.9	MRPL3	protein_coding	MRPL3-201	protein_coding	1708	10	9	High Confidence
ENST00000264995.8	M8/D6	2	0.881416	-0.182148	0.775165	ENST00000264995.8 M8/D6	0.0507539	ENSG00000114686.9	MRPL3	protein_coding	MRPL3-201	protein_coding	1708	10	9	Low Confidence
ENST00000265000.9	M8/D6	4	0.638368	-0.649222	2.77578	ENST00000265000.9 M8/D6	0.00443018	ENSG00000109586.12	GALNT7	protein_coding	GALNT7-201	protein_coding	4249	12	11	Medium Confidence
ENST00000265036.10	D5/D6	2	0.606426	-0.722115	2.68144	ENST00000265036.10 D5/D6	0.0544148	ENSG00000035499.13	DEPDC1B	protein_coding	DEPDC1B-201	protein_coding	2504	11	10	Medium Confidence
ENST00000265036.10	M8/D6	3	2.38725	1.25523	0.892141	ENST00000265036.10 M8/D6	0.000125628	ENSG00000035499.13	DEPDC1B	protein_coding	DEPDC1B-201	protein_coding	2504	11	10	High Confidence
ENST00000265044.7	D5/D6	3	1.06341	0.0880028	2.17812	ENST00000265044.7 D5/D6	0.0717955	ENSG00000114850.7	SSR3	protein_coding	SSR3-201	protein_coding	4236	5	4	Medium Confidence
ENST00000265044.7	M8/D6	3	0.829296	-0.270692	2.11687	ENST00000265044.7 M8/D6	0.00882479	ENSG00000114850.7	SSR3	protein_coding	SSR3-201	protein_coding	4236	5	4	Medium Confidence
ENST00000265056.12	D5/D6	4	1.54706	0.625339	4.39124	ENST00000265056.12 D5/D6	0.00157517	ENSG00000073111.14	MCM2	protein_coding	MCM2-201	protein_coding	3434	16	15	Low Confidence
ENST00000265062.8	D5/D6	4	1.17537	0.232541	1.65091	ENST00000265062.8 D5/D6	0.0681897	ENSG00000075785.14	RAB7A	protein_coding	RAB7A-201	protein_coding	2185	6	5	High Confidence
ENST00000265069.13	D5/D6	2	1.16868	0.224877	0.125686	ENST00000265069.13 D5/D6	0.0470707	ENSG00000056097.16	ZFR	protein_coding	ZFR-201	protein_coding	4717	20	19	Low Confidence
ENST00000265070.7	F7/D6	2	0.743577	-0.427474	0.618585	ENST00000265070.7 F7/D6	0.0305999	ENSG00000113384.14	GOLPH3	protein_coding	GOLPH3-201	protein_coding	2678	4	3	Low Confidence
ENST00000265070.7	M8/D6	4	0.768907	-0.379381	1.10473	ENST00000265070.7 M8/D6	0.156172	ENSG00000113384.14	GOLPH3	protein_coding	GOLPH3-201	protein_coding	2678	4	3	High Confidence
ENST00000265073.9	F7/D6	3	0.888188	-0.171398	1.52961	ENST00000265073.9 F7/D6	0.0166852	ENSG00000113387.12	SUB1	protein_coding	SUB1-201	protein_coding	3449	5	4	High Confidence
ENST00000265073.9	M8/D6	2	0.883457	-0.178773	0.253427	ENST00000265073.9 M8/D6	0.0635689	ENSG00000113387.12	SUB1	protein_coding	SUB1-201	protein_coding	3449	5	4	Low Confidence
ENST00000265080.9	F7/D6	3	3.20369	1.67948	1.32959	ENST00000265080.9 F7/D6	0.00081119	ENSG00000113319.13	RASGRF2	protein_coding	RASGRF2-201	protein_coding	8482	27	26	High Confidence
ENST00000265080.9	M8/D6	3	0.520783	-0.941401	1.02832	ENST00000265080.9 M8/D6	0.107587	ENSG00000113319.13	RASGRF2	protein_coding	RASGRF2-201	protein_coding	8482	27	26	High Confidence
ENST00000265085.10	D5/D6	2	0.599818	-0.741924	7.90404	ENST00000265085.10 D5/D6	0.00436571	ENSG00000113742.14	CPEB4	protein_coding	CPEB4-201	protein_coding	9418	10	9	Low Confidence
ENST00000265087.9	D5/D6	3	0.815549	-0.295889	3.49662	ENST00000265087.9 D5/D6	0.00302108	ENSG00000113739.11	STC2	protein_coding	STC2-201	protein_coding	4254	4	3	Medium Confidence
ENST00000265087.9	F7/D6	2	0.883341	-0.178984	0.600861	ENST00000265087.9 F7/D6	0.0734271	ENSG00000113739.11	STC2	protein_coding	STC2-201	protein_coding	4254	4	3	Low Confidence
ENST00000265087.9	M8/D6	3	0.814433	-0.296195	0.659387	ENST00000265087.9 M8/D6	0.0424288	ENSG00000113739.11	STC2	protein_coding	STC2-201	protein_coding	4254	4	3	High Confidence
ENST00000265097.9	M8/D6	2	1.03319	-0.0601603	37.1716	ENST00000265097.9 M8/D6	0.0246584	ENSG00000051596.10	THOC3	protein_coding	THOC3-201	protein_coding	1601	6	5	Low Confidence
ENST00000265112.8	D5/D6	3	1.14941	0.200715	1.12175	ENST00000265112.8 D5/D6	0.0183992	ENSG00000113407.14	TARS1	protein_coding	TARS1-201	protein_coding	2672	19	18	High Confidence
ENST00000265138.4	D5/D6	3	0.397857	-1.33012	1.75484	ENST00000265138.4 D5/D6	0.000431038	ENSG00000113369.9	ARRDC3	protein_coding	ARRDC3-201	protein_coding	4239	8	7	High Confidence
ENST00000265138.4	M8/D6	2	0.519371	-0.949958	8.13992	ENST00000265138.4 M8/D6	0.0022753	ENSG00000113369.9	ARRDC3	protein_coding	ARRDC3-201	protein_coding	4239	8	7	Low Confidence
ENST00000265164.7	D5/D6	3	0.627425	-0.672833	1.55762	ENST00000265164.7 D5/D6	0.00376964	ENSG00000138794.10	CASP6	protein_coding	CASP6-201	protein_coding	1634	7	6	High Confidence
ENST00000265165.6	M8/D6	3	0.337428	-1.57	4.32874	ENST00000265165.6 M8/D6	0.000202672	ENSG00000138795.10	LEF1	protein_coding	LEF1-201	protein_coding	3575	12	11	Low Confidence
ENST00000265191.4	M8/D6	2	2.06534	1.04638	0.116691	ENST00000265191.4 M8/D6	0.120357	ENSG00000112981.5	NME5	protein_coding	NME5-201	protein_coding	1208	6	5	Low Confidence
ENST00000265192.9	D5/D6	2	1.18124	0.240302	0.117225	ENST00000265192.9 D5/D6	0.211641	ENSG00000120727.13	PAIP2	protein_coding	PAIP2-201	protein_coding	1456	4	3	Low Confidence
ENST00000265192.9	M8/D6	2	1.13185	0.178686	0.13644	ENST00000265192.9 M8/D6	0.159378	ENSG00000120727.13	PAIP2	protein_coding	PAIP2-201	protein_coding	1456	4	3	Low Confidence
ENST00000265239.11	D5/D6	2	0.299616	-1.74423	8.64752	ENST00000265239.11 D5/D6	0.0222448	ENSG00000114473.14	IQCG	protein_coding	IQCG-201	protein_coding	2232	12	11	Low Confidence
ENST00000265245.10	D5/D6	3	1.11135	0.152083	1.2827	ENST00000265245.10 D5/D6	0.049757	ENSG00000041802.11	LSG1	protein_coding	LSG1-201	protein_coding	3283	14	13	High Confidence
ENST00000265304.11	D5/D6	2	1.06916	0.0964255	0.879665	ENST00000265304.11 D5/D6	0.117209	ENSG00000106028.11	SSBP1	protein_coding	SSBP1-201	protein_coding	677	7	6	Low Confidence
ENST00000265316.9	D5/D6	2	0.609774	-0.714335	3.07517	ENST00000265316.9 D5/D6	0.0697548	ENSG00000115657.14	ABCB6	protein_coding	ABCB6-201	protein_coding	2980	19	18	Medium Confidence
ENST00000265322.8	D5/D6	2	0.770771	-0.376433	3.34214	ENST00000265322.8 D5/D6	0.0696913	ENSG00000115425.14	PECR	protein_coding	PECR-201	protein_coding	1867	8	7	Medium Confidence
ENST00000265322.8	F7/D6	2	1.25208	0.32407	1.8949	ENST00000265322.8 F7/D6	0.0860138	ENSG00000115425.14	PECR	protein_coding	PECR-201	protein_coding	1867	8	7	Medium Confidence
ENST00000265333.8	D5/D6	2	0.561693	-0.835614	6.92515	ENST00000265333.8 D5/D6	0.0548087	ENSG00000213585.11	VDAC1	protein_coding	VDAC1-201	protein_coding	1839	9	8	Low Confidence
ENST00000265339.7	D5/D6	2	1.15685	0.210198	0.239766	ENST00000265339.7 D5/D6	0.0236478	ENSG00000119048.9	UBE2B	protein_coding	UBE2B-201	protein_coding	2241	6	5	Low Confidence
ENST00000265382.8	D5/D6	3	0.574665	-0.799419	1.20981	ENST00000265382.8 D5/D6	0.0289247	ENSG00000107242.20	PIP5K1B	protein_coding	PIP5K1B-201	protein_coding	3115	16	15	High Confidence
ENST00000265393.10	D5/D6	3	0.717857	-0.478984	2.29872	ENST00000265393.10 D5/D6	0.00575974	ENSG00000106052.14	TAX1BP1	protein_coding	TAX1BP1-201	protein_coding	2478	17	16	Medium Confidence
ENST00000265404.7	D5/D6	4	0.557709	-0.842724	1.18528	ENST00000265404.7 D5/D6	0.000231936	ENSG00000035720.8	STAP1	protein_coding	STAP1-201	protein_coding	1951	9	8	High Confidence
ENST00000265404.7	M8/D6	4	1.61839	0.692161	3.33132	ENST00000265404.7 M8/D6	0.000718298	ENSG00000035720.8	STAP1	protein_coding	STAP1-201	protein_coding	1951	9	8	Medium Confidence
ENST00000265421.9	D5/D6	3	1.35533	0.438326	1.48942	ENST00000265421.9 D5/D6	0.00729175	ENSG00000070501.12	POLB	protein_coding	POLB-201	protein_coding	1290	14	13	High Confidence
ENST00000265421.9	F7/D6	2	1.25687	0.329808	0.647501	ENST00000265421.9 F7/D6	0.0351667	ENSG00000070501.12	POLB	protein_coding	POLB-201	protein_coding	1290	14	13	Low Confidence
ENST00000265437.9	D5/D6	2	1.82007	0.838125	18.7697	ENST00000265437.9 D5/D6	0.0508758	ENSG00000004866.22	ST7	protein_coding	ST7-201	protein_coding	2899	16	15	Low Confidence
ENST00000265462.9	D5/D6	4	0.921419	-0.119124	2.23691	ENST00000265462.9 D5/D6	0.00152886	ENSG00000126432.14	PRDX5	protein_coding	PRDX5-201	protein_coding	860	6	5	Medium Confidence
ENST00000265462.9	F7/D6	3	0.813403	-0.298023	0.670462	ENST00000265462.9 F7/D6	0.0125795	ENSG00000126432.14	PRDX5	protein_coding	PRDX5-201	protein_coding	860	6	5	High Confidence
ENST00000265462.9	M8/D6	3	0.816189	-0.293237	1.2139	ENST00000265462.9 M8/D6	0.0205318	ENSG00000126432.14	PRDX5	protein_coding	PRDX5-201	protein_coding	860	6	5	High Confidence
ENST00000265465.8	D5/D6	2	0.868575	-0.203353	1.02116	ENST00000265465.8 D5/D6	0.0380077	ENSG00000014138.10	POLA2	protein_coding	POLA2-201	protein_coding	3544	18	17	Low Confidence
ENST00000265498.6	D5/D6	3	0.841143	-0.249599	0.396961	ENST00000265498.6 D5/D6	0.0709065	ENSG00000085871.9	MGST2	protein_coding	MGST2-201	protein_coding	740	5	4	High Confidence
ENST00000265498.6	F7/D6	4	0.695398	-0.524192	0.690772	ENST00000265498.6 F7/D6	0.0157951	ENSG00000085871.9	MGST2	protein_coding	MGST2-201	protein_coding	740	5	4	High Confidence
ENST00000265498.6	M8/D6	4	1.19213	0.253466	0.609223	ENST00000265498.6 M8/D6	0.0445811	ENSG00000085871.9	MGST2	protein_coding	MGST2-201	protein_coding	740	5	4	High Confidence
ENST00000265523.9	D5/D6	3	0.84726	-0.23916	0.502455	ENST00000265523.9 D5/D6	0.00455003	ENSG00000106605.11	BLVRA	protein_coding	BLVRA-201	protein_coding	1074	8	7	High Confidence
ENST00000265523.9	F7/D6	3	1.30438	0.383229	0.952727	ENST00000265523.9 F7/D6	0.00840681	ENSG00000106605.11	BLVRA	protein_coding	BLVRA-201	protein_coding	1074	8	7	High Confidence
ENST00000265523.9	M8/D6	3	0.75199	-0.411235	0.366814	ENST00000265523.9 M8/D6	0.0035383	ENSG00000106605.11	BLVRA	protein_coding	BLVRA-201	protein_coding	1074	8	7	High Confidence
ENST00000265563.13	M8/D6	2	0.71936	-0.476177	3.65244	ENST00000265563.13 M8/D6	0.0474624	ENSG00000114302.17	PRKAR2A	protein_coding	PRKAR2A-201	protein_coding	6492	11	10	Medium Confidence
ENST00000265564.8	D5/D6	3	1.30252	0.381274	0.465245	ENST00000265564.8 D5/D6	0.0208807	ENSG00000075914.13	EXOSC7	protein_coding	EXOSC7-201	protein_coding	1042	8	7	High Confidence
ENST00000265565.10	D5/D6	2	1.2012	0.260299	7.59871	ENST00000265565.10 D5/D6	0.0679862	ENSG00000114650.21	SCAP	protein_coding	SCAP-201	protein_coding	4254	23	22	Low Confidence
ENST00000265598.8	D5/D6	3	0.778635	-0.361038	0.622951	ENST00000265598.8 D5/D6	0.0276036	ENSG00000078081.8	LAMP3	protein_coding	LAMP3-201	protein_coding	3196	6	5	High Confidence
ENST00000265598.8	M8/D6	2	0.791137	-0.338044	0.775361	ENST00000265598.8 M8/D6	0.0393535	ENSG00000078081.8	LAMP3	protein_coding	LAMP3-201	protein_coding	3196	6	5	Low Confidence
ENST00000265602.11	M8/D6	2	0.455904	-1.13435	3.99174	ENST00000265602.11 M8/D6	0.0057366	ENSG00000135541.22	AHI1	protein_coding	AHI1-201	protein_coding	6063	29	28	Low Confidence
ENST00000265641.10	D5/D6	2	1.56954	0.650249	1.11466	ENST00000265641.10 D5/D6	0.00673747	ENSG00000110090.13	CPT1A	protein_coding	CPT1A-201	protein_coding	5238	19	18	Low Confidence
ENST00000265678.9	D5/D6	2	0.521006	-0.948251	10.2524	ENST00000265678.9 D5/D6	0.0165574	ENSG00000071242.12	RPS6KA2	protein_coding	RPS6KA2-201	protein_coding	5832	21	20	Low Confidence
ENST00000265678.9	F7/D6	2	1.59723	0.675397	1.55647	ENST00000265678.9 F7/D6	0.00980132	ENSG00000071242.12	RPS6KA2	protein_coding	RPS6KA2-201	protein_coding	5832	21	20	Low Confidence
ENST00000265689.9	D5/D6	2	1.2989	0.377216	1.03415	ENST00000265689.9 D5/D6	0.11331	ENSG00000110721.12	CHKA	protein_coding	CHKA-201	protein_coding	2714	12	11	Low Confidence
ENST00000265713.8	D5/D6	2	1.42187	0.506511	4.20205	ENST00000265713.8 D5/D6	0.107655	ENSG00000083168.11	KAT6A	protein_coding	KAT6A-201	protein_coding	9153	17	16	Low Confidence
ENST00000265729.7	D5/D6	2	1.20334	0.267039	0.276409	ENST00000265729.7 D5/D6	0.0432253	ENSG00000075142.14	SRI	protein_coding	SRI-201	protein_coding	1972	8	7	Low Confidence
ENST00000265729.7	F7/D6	2	1.1497	0.200501	3.24144	ENST00000265729.7 F7/D6	0.0419426	ENSG00000075142.14	SRI	protein_coding	SRI-201	protein_coding	1972	8	7	Medium Confidence
ENST00000265729.7	M8/D6	4	0.720447	-0.473354	1.20455	ENST00000265729.7 M8/D6	0.00710984	ENSG00000075142.14	SRI	protein_coding	SRI-201	protein_coding	1972	8	7	High Confidence
ENST00000265753.13	D5/D6	4	0.501366	-0.998144	3.14098	ENST00000265753.13 D5/D6	0.0014776	ENSG00000106682.16	EIF4H	protein_coding	EIF4H-201	protein_coding	2563	7	6	Medium Confidence
ENST00000265753.13	F7/D6	4	1.44623	0.529638	3.51826	ENST00000265753.13 F7/D6	0.00977566	ENSG00000106682.16	EIF4H	protein_coding	EIF4H-201	protein_coding	2563	7	6	Medium Confidence
ENST00000265753.13	M8/D6	4	1.7384	0.795045	3.60751	ENST00000265753.13 M8/D6	0.00557043	ENSG00000106682.16	EIF4H	protein_coding	EIF4H-201	protein_coding	2563	7	6	Medium Confidence
ENST00000265758.7	D5/D6	4	1.19465	0.256588	0.142759	ENST00000265758.7 D5/D6	0.0260505	ENSG00000071462.13	BUD23	protein_coding	BUD23-201	protein_coding	1201	12	11	High Confidence
ENST00000265806.12	D5/D6	3	0.859188	-0.218997	0.543874	ENST00000265806.12 D5/D6	0.0225668	ENSG00000104679.12	R3HCC1	protein_coding	R3HCC1-201	protein_coding	1573	8	7	High Confidence
ENST00000265838.9	D5/D6	2	1.1784	0.236826	0.163083	ENST00000265838.9 D5/D6	0.0197669	ENSG00000075239.14	ACAT1	protein_coding	ACAT1-201	protein_coding	1537	12	11	Low Confidence
ENST00000265866.12	D5/D6	2	0.861522	-0.215556	2.67068	ENST00000265866.12 D5/D6	0.0705239	ENSG00000096746.18	HNRNPH3	protein_coding	HNRNPH3-201	protein_coding	2356	10	9	Medium Confidence
ENST00000265866.12	F7/D6	2	0.856259	-0.224129	1.85719	ENST00000265866.12 F7/D6	0.037288	ENSG00000096746.18	HNRNPH3	protein_coding	HNRNPH3-201	protein_coding	2356	10	9	Medium Confidence
ENST00000265866.12	M8/D6	3	0.720356	-0.477137	5.28701	ENST00000265866.12 M8/D6	0.00256767	ENSG00000096746.18	HNRNPH3	protein_coding	HNRNPH3-201	protein_coding	2356	10	9	Low Confidence
ENST00000265881.10	M8/D6	4	0.399876	-1.32288	1.51601	ENST00000265881.10 M8/D6	0.00349891	ENSG00000076043.11	REXO2	protein_coding	REXO2-201	protein_coding	1080	7	6	High Confidence
ENST00000265896.10	D5/D6	3	0.788422	-0.343013	0.604972	ENST00000265896.10 D5/D6	0.0256852	ENSG00000104549.12	SQLE	protein_coding	SQLE-201	protein_coding	2962	11	10	High Confidence
ENST00000265896.10	M8/D6	3	1.19783	0.260418	0.212002	ENST00000265896.10 M8/D6	0.0498596	ENSG00000104549.12	SQLE	protein_coding	SQLE-201	protein_coding	2962	11	10	High Confidence
ENST00000265960.8	D5/D6	3	0.700523	-0.513945	1.77532	ENST00000265960.8 D5/D6	0.0144119	ENSG00000119487.17	MAPKAP1	protein_coding	MAPKAP1-201	protein_coding	3369	12	11	High Confidence
ENST00000265963.9	D5/D6	4	1.20862	0.270709	3.41693	ENST00000265963.9 D5/D6	0.00587066	ENSG00000110768.12	GTF2H1	protein_coding	GTF2H1-201	protein_coding	3012	15	14	Medium Confidence
ENST00000266022.9	F7/D6	3	0.780804	-0.358173	2.91687	ENST00000266022.9 F7/D6	0.0476946	ENSG00000004534.15	RBM6	protein_coding	RBM6-201	protein_coding	3630	21	20	Medium Confidence
ENST00000266079.5	F7/D6	4	0.810404	-0.304147	1.98863	ENST00000266079.5 F7/D6	0.0574953	ENSG00000101161.8	PRPF6	protein_coding	PRPF6-201	protein_coding	3047	21	20	Medium Confidence
ENST00000266079.5	M8/D6	4	0.714463	-0.485522	1.45606	ENST00000266079.5 M8/D6	0.000778543	ENSG00000101161.8	PRPF6	protein_coding	PRPF6-201	protein_coding	3047	21	20	High Confidence
ENST00000266263.10	D5/D6	2	0.908077	-0.139265	1.44852	ENST00000266263.10 D5/D6	0.0715476	ENSG00000242114.6	MTFP1	protein_coding	MTFP1-201	protein_coding	1133	4	3	Low Confidence
ENST00000266458.10	D5/D6	3	0.511601	-0.966977	0.693251	ENST00000266458.10 D5/D6	0.000565122	ENSG00000139112.11	GABARAPL1	protein_coding	GABARAPL1-201	protein_coding	1883	4	3	High Confidence
ENST00000266458.10	M8/D6	3	0.626862	-0.675732	3.71987	ENST00000266458.10 M8/D6	0.0108013	ENSG00000139112.11	GABARAPL1	protein_coding	GABARAPL1-201	protein_coding	1883	4	3	Low Confidence
ENST00000266517.9	D5/D6	3	1.3058	0.384536	1.65711	ENST00000266517.9 D5/D6	0.0111449	ENSG00000139163.16	ETNK1	protein_coding	ETNK1-201	protein_coding	7063	8	7	High Confidence
ENST00000266529.8	D5/D6	2	0.961874	-0.0561009	0.533289	ENST00000266529.8 D5/D6	0.106747	ENSG00000139168.9	ZCRB1	protein_coding	ZCRB1-201	protein_coding	1808	8	7	Low Confidence
ENST00000266556.8	D5/D6	3	0.551985	-0.857888	2.01004	ENST00000266556.8 D5/D6	0.000242453	ENSG00000139192.12	TAPBPL	protein_coding	TAPBPL-201	protein_coding	1781	7	6	Medium Confidence
ENST00000266556.8	F7/D6	3	0.58786	-0.768053	3.30645	ENST00000266556.8 F7/D6	0.000469945	ENSG00000139192.12	TAPBPL	protein_coding	TAPBPL-201	protein_coding	1781	7	6	Medium Confidence
ENST00000266556.8	M8/D6	2	1.30653	0.385535	1.68081	ENST00000266556.8 M8/D6	0.0638077	ENSG00000139192.12	TAPBPL	protein_coding	TAPBPL-201	protein_coding	1781	7	6	Low Confidence
ENST00000266557.4	D5/D6	3	0.851311	-0.232574	1.50873	ENST00000266557.4 D5/D6	0.0121907	ENSG00000139193.4	CD27	protein_coding	CD27-201	protein_coding	1245	6	5	High Confidence
ENST00000266557.4	F7/D6	4	0.748561	-0.417903	0.662434	ENST00000266557.4 F7/D6	0.006124	ENSG00000139193.4	CD27	protein_coding	CD27-201	protein_coding	1245	6	5	High Confidence
ENST00000266557.4	M8/D6	4	0.484383	-1.04629	1.52028	ENST00000266557.4 M8/D6	1.40493e-05	ENSG00000139193.4	CD27	protein_coding	CD27-201	protein_coding	1245	6	5	High Confidence
ENST00000266563.9	D5/D6	2	1.24121	0.311298	2.49592	ENST00000266563.9 D5/D6	0.126345	ENSG00000139197.11	PEX5	protein_coding	PEX5-201	protein_coding	3252	15	14	Medium Confidence
ENST00000266604.7	D5/D6	2	0.9121	-0.132868	1.35279	ENST00000266604.7 D5/D6	0.0297369	ENSG00000139233.7	LLPH	protein_coding	LLPH-201	protein_coding	7728	3	2	Low Confidence
ENST00000266646.3	D5/D6	4	0.392233	-1.35344	3.85528	ENST00000266646.3 D5/D6	0.000185691	ENSG00000139269.3	INHBE	protein_coding	INHBE-201	protein_coding	2460	2	1	Low Confidence
ENST00000266646.3	F7/D6	3	0.673635	-0.57011	1.01874	ENST00000266646.3 F7/D6	0.0157845	ENSG00000139269.3	INHBE	protein_coding	INHBE-201	protein_coding	2460	2	1	High Confidence
ENST00000266659.8	F7/D6	2	0.755557	-0.404388	0.107466	ENST00000266659.8 F7/D6	0.0164528	ENSG00000139278.10	GLIPR1	protein_coding	GLIPR1-201	protein_coding	5812	6	5	Low Confidence
ENST00000266679.8	D5/D6	2	0.688613	-0.541973	7.19006	ENST00000266679.8 D5/D6	0.0862924	ENSG00000111605.18	CPSF6	protein_coding	CPSF6-201	protein_coding	2229	11	10	Low Confidence
ENST00000266735.10	D5/D6	3	1.14442	0.19461	0.218273	ENST00000266735.10 D5/D6	0.000392384	ENSG00000139343.11	SNRPF	protein_coding	SNRPF-201	protein_coding	452	4	3	High Confidence
ENST00000266744.4	D5/D6	2	0.325427	-1.61974	1.40855	ENST00000266744.4 D5/D6	0.0197008	ENSG00000139352.4	ASCL1	protein_coding	ASCL1-201	protein_coding	2481	2	1	Low Confidence
ENST00000266943.11	M8/D6	2	1.36256	0.446312	0.302696	ENST00000266943.11 M8/D6	0.075254	ENSG00000139508.15	SLC46A3	protein_coding	SLC46A3-201	protein_coding	3302	6	5	Low Confidence
ENST00000267023.9	D5/D6	3	0.805127	-0.312855	1.00319	ENST00000267023.9 D5/D6	0.0830445	ENSG00000139579.13	NABP2	protein_coding	NABP2-201	protein_coding	1400	7	6	High Confidence
ENST00000267023.9	M8/D6	2	0.900654	-0.151168	1.71962	ENST00000267023.9 M8/D6	0.240529	ENSG00000139579.13	NABP2	protein_coding	NABP2-201	protein_coding	1400	7	6	Low Confidence
ENST00000267082.10	D5/D6	4	0.418927	-1.25576	1.56281	ENST00000267082.10 D5/D6	8.89942e-06	ENSG00000139626.16	ITGB7	protein_coding	ITGB7-201	protein_coding	2806	16	15	High Confidence
ENST00000267082.10	F7/D6	3	0.763991	-0.394643	6.70583	ENST00000267082.10 F7/D6	0.0023868	ENSG00000139626.16	ITGB7	protein_coding	ITGB7-201	protein_coding	2806	16	15	Low Confidence
ENST00000267082.10	M8/D6	3	0.804836	-0.316664	4.93496	ENST00000267082.10 M8/D6	0.00403858	ENSG00000139626.16	ITGB7	protein_coding	ITGB7-201	protein_coding	2806	16	15	Low Confidence
ENST00000267102.13	D5/D6	3	0.686714	-0.542406	1.14334	ENST00000267102.13 D5/D6	0.0109283	ENSG00000139636.16	LMBR1L	protein_coding	LMBR1L-201	protein_coding	2295	17	16	High Confidence
ENST00000267115.10	D5/D6	4	0.877484	-0.190267	2.81623	ENST00000267115.10 D5/D6	0.0048607	ENSG00000139644.13	TMBIM6	protein_coding	TMBIM6-201	protein_coding	2837	10	9	Medium Confidence
ENST00000267115.10	F7/D6	4	0.854333	-0.227499	1.31319	ENST00000267115.10 F7/D6	0.00429579	ENSG00000139644.13	TMBIM6	protein_coding	TMBIM6-201	protein_coding	2837	10	9	High Confidence
ENST00000267115.10	M8/D6	4	0.854368	-0.227666	1.66157	ENST00000267115.10 M8/D6	0.0057185	ENSG00000139644.13	TMBIM6	protein_coding	TMBIM6-201	protein_coding	2837	10	9	High Confidence
ENST00000267163.6	D5/D6	4	0.501447	-0.996728	2.06249	ENST00000267163.6 D5/D6	0.00010922	ENSG00000139687.16	RB1	protein_coding	RB1-201	protein_coding	4768	27	26	Medium Confidence
ENST00000267163.6	F7/D6	4	0.644715	-0.634281	2.1644	ENST00000267163.6 F7/D6	0.00438545	ENSG00000139687.16	RB1	protein_coding	RB1-201	protein_coding	4768	27	26	Medium Confidence
ENST00000267199.9	D5/D6	2	0.893932	-0.161796	0.682079	ENST00000267199.9 D5/D6	0.220641	ENSG00000139719.11	VPS33A	protein_coding	VPS33A-201	protein_coding	4559	13	12	Low Confidence
ENST00000267202.7	D5/D6	4	0.341262	-1.55216	2.2483	ENST00000267202.7 D5/D6	0.000685322	ENSG00000139722.7	VPS37B	protein_coding	VPS37B-201	protein_coding	2706	4	3	Medium Confidence
ENST00000267205.7	D5/D6	3	0.698709	-0.517358	0.919728	ENST00000267205.7 D5/D6	0.00275939	ENSG00000139725.8	RHOF	protein_coding	RHOF-201	protein_coding	2435	5	4	High Confidence
ENST00000267328.5	D5/D6	4	0.557023	-0.845366	2.29487	ENST00000267328.5 D5/D6	0.0314714	ENSG00000139832.5	RAB20	protein_coding	RAB20-201	protein_coding	1507	2	1	Medium Confidence
ENST00000267328.5	F7/D6	4	0.227038	-2.1395	1.53538	ENST00000267328.5 F7/D6	0.00110515	ENSG00000139832.5	RAB20	protein_coding	RAB20-201	protein_coding	1507	2	1	High Confidence
ENST00000267328.5	M8/D6	2	1.47227	0.558029	0.432657	ENST00000267328.5 M8/D6	0.0423667	ENSG00000139832.5	RAB20	protein_coding	RAB20-201	protein_coding	1507	2	1	Low Confidence
ENST00000267339.6	D5/D6	3	1.22552	0.29319	1.16875	ENST00000267339.6 D5/D6	0.0144403	ENSG00000088448.14	ANKRD10	protein_coding	ANKRD10-201	protein_coding	2495	6	5	High Confidence
ENST00000267339.6	M8/D6	3	0.777548	-0.363282	1.40857	ENST00000267339.6 M8/D6	0.0116319	ENSG00000088448.14	ANKRD10	protein_coding	ANKRD10-201	protein_coding	2495	6	5	High Confidence
ENST00000267549.5	F7/D6	2	0.777684	-0.362991	1.84904	ENST00000267549.5 F7/D6	0.0472501	ENSG00000140030.6	GPR65	protein_coding	GPR65-201	protein_coding	4511	2	1	Medium Confidence
ENST00000267615.11	D5/D6	2	1.93738	0.95323	3.48635	ENST00000267615.11 D5/D6	0.00937796	ENSG00000100605.17	ITPK1	protein_coding	ITPK1-201	protein_coding	6188	11	10	Medium Confidence
ENST00000267812.4	F7/D6	2	0.883318	-0.179009	0.449654	ENST00000267812.4 F7/D6	0.124118	ENSG00000140259.7	MFAP1	protein_coding	MFAP1-201	protein_coding	2043	9	8	Low Confidence
ENST00000267814.14	D5/D6	2	1.45595	0.541504	2.52389	ENST00000267814.14 D5/D6	0.00861047	ENSG00000140263.15	SORD	protein_coding	SORD-201	protein_coding	4818	9	8	Medium Confidence
ENST00000267814.14	M8/D6	2	1.37733	0.460763	3.92405	ENST00000267814.14 M8/D6	0.0261453	ENSG00000140263.15	SORD	protein_coding	SORD-201	protein_coding	4818	9	8	Low Confidence
ENST00000267838.7	D5/D6	3	1.23091	0.298203	3.27373	ENST00000267838.7 D5/D6	0.00861009	ENSG00000140280.14	LYSMD2	protein_coding	LYSMD2-201	protein_coding	1277	3	2	Medium Confidence
ENST00000267868.8	M8/D6	2	1.72577	0.786899	2.17385	ENST00000267868.8 M8/D6	0.00893275	ENSG00000051180.17	RAD51	protein_coding	RAD51-201	protein_coding	2436	10	9	Medium Confidence
ENST00000267884.11	D5/D6	3	0.938955	-0.0909447	0.712928	ENST00000267884.11 D5/D6	0.00289495	ENSG00000140319.11	SRP14	protein_coding	SRP14-201	protein_coding	1119	5	4	High Confidence
ENST00000267884.11	M8/D6	3	0.738849	-0.438512	3.5502	ENST00000267884.11 M8/D6	0.0500194	ENSG00000140319.11	SRP14	protein_coding	SRP14-201	protein_coding	1119	5	4	Medium Confidence
ENST00000267953.4	D5/D6	3	1.25471	0.327332	0.42571	ENST00000267953.4 D5/D6	0.00695347	ENSG00000140379.9	BCL2A1	protein_coding	BCL2A1-201	protein_coding	780	2	1	High Confidence
ENST00000267953.4	F7/D6	3	1.19962	0.262451	0.92606	ENST00000267953.4 F7/D6	0.0319126	ENSG00000140379.9	BCL2A1	protein_coding	BCL2A1-201	protein_coding	780	2	1	High Confidence
ENST00000267953.4	M8/D6	4	1.15921	0.212255	2.03959	ENST00000267953.4 M8/D6	0.0319084	ENSG00000140379.9	BCL2A1	protein_coding	BCL2A1-201	protein_coding	780	2	1	Medium Confidence
ENST00000267973.7	D5/D6	3	1.51934	0.603364	0.767969	ENST00000267973.7 D5/D6	0.000341604	ENSG00000140395.9	SKIC8	protein_coding	SKIC8-201	protein_coding	1202	11	10	High Confidence
ENST00000267984.4	M8/D6	3	0.613628	-0.70915	5.54435	ENST00000267984.4 M8/D6	0.0929998	ENSG00000140406.4	TLNRD1	protein_coding	TLNRD1-201	protein_coding	4866	1	0	Low Confidence
ENST00000268057.9	D5/D6	3	0.736571	-0.441366	1.34282	ENST00000268057.9 D5/D6	0.129891	ENSG00000140463.14	BBS4	protein_coding	BBS4-201	protein_coding	2467	16	15	High Confidence
ENST00000268150.13	M8/D6	3	2.2981	1.19779	4.34259	ENST00000268150.13 M8/D6	0.0173951	ENSG00000140545.16	MFGE8	protein_coding	MFGE8-201	protein_coding	1936	8	7	Low Confidence
ENST00000268184.11	D5/D6	2	0.804959	-0.313868	3.44071	ENST00000268184.11 D5/D6	0.0372828	ENSG00000140577.17	CRTC3	protein_coding	CRTC3-201	protein_coding	5214	15	14	Medium Confidence
ENST00000268184.11	F7/D6	2	0.792535	-0.335756	2.04521	ENST00000268184.11 F7/D6	0.0749079	ENSG00000140577.17	CRTC3	protein_coding	CRTC3-201	protein_coding	5214	15	14	Medium Confidence
ENST00000268220.12	M8/D6	3	0.845041	-0.243013	0.856813	ENST00000268220.12 M8/D6	0.00475886	ENSG00000140612.14	SEC11A	protein_coding	SEC11A-201	protein_coding	1079	6	5	High Confidence
ENST00000268261.9	M8/D6	4	0.81734	-0.291094	0.690994	ENST00000268261.9 M8/D6	0.0389706	ENSG00000140650.13	PMM2	protein_coding	PMM2-201	protein_coding	2285	8	7	High Confidence
ENST00000268296.9	D5/D6	2	0.37308	-1.42304	2.88577	ENST00000268296.9 D5/D6	0.00855967	ENSG00000140678.17	ITGAX	protein_coding	ITGAX-201	protein_coding	4663	30	29	Medium Confidence
ENST00000268379.9	F7/D6	3	1.164	0.218351	2.27714	ENST00000268379.9 F7/D6	0.0140985	ENSG00000140740.11	UQCRC2	protein_coding	UQCRC2-201	protein_coding	1914	14	13	Medium Confidence
ENST00000268638.10	D5/D6	4	1.44608	0.532039	0.713724	ENST00000268638.10 D5/D6	0.00324205	ENSG00000140968.12	IRF8	protein_coding	IRF8-201	protein_coding	2668	9	8	High Confidence
ENST00000268638.10	F7/D6	3	0.903488	-0.14645	0.4317	ENST00000268638.10 F7/D6	0.187123	ENSG00000140968.12	IRF8	protein_coding	IRF8-201	protein_coding	2668	9	8	High Confidence
ENST00000268638.10	M8/D6	4	1.43765	0.522952	1.8722	ENST00000268638.10 M8/D6	0.00380425	ENSG00000140968.12	IRF8	protein_coding	IRF8-201	protein_coding	2668	9	8	Medium Confidence
ENST00000268717.10	D5/D6	3	1.18922	0.24792	3.85131	ENST00000268717.10 D5/D6	0.0567422	ENSG00000141030.13	COPS3	protein_coding	COPS3-201	protein_coding	1814	12	11	Low Confidence
ENST00000268717.10	M8/D6	2	0.875828	-0.191418	1.38426	ENST00000268717.10 M8/D6	0.0278483	ENSG00000141030.13	COPS3	protein_coding	COPS3-201	protein_coding	1814	12	11	Low Confidence
ENST00000268719.9	F7/D6	2	1.27139	0.346268	1.38215	ENST00000268719.9 F7/D6	0.0621923	ENSG00000141034.10	GID4	protein_coding	GID4-201	protein_coding	4122	6	5	Low Confidence
ENST00000268802.10	D5/D6	4	1.42293	0.50859	1.12036	ENST00000268802.10 D5/D6	0.000217385	ENSG00000141101.13	NOB1	protein_coding	NOB1-201	protein_coding	1716	9	8	High Confidence
ENST00000268835.7	D5/D6	3	1.21908	0.285767	0.445438	ENST00000268835.7 D5/D6	0.0172854	ENSG00000141127.15	PRPSAP2	protein_coding	PRPSAP2-201	protein_coding	1958	12	11	High Confidence
ENST00000268835.7	M8/D6	3	0.830713	-0.267781	1.1831	ENST00000268835.7 M8/D6	0.0264721	ENSG00000141127.15	PRPSAP2	protein_coding	PRPSAP2-201	protein_coding	1958	12	11	High Confidence
ENST00000268896.10	M8/D6	3	0.659633	-0.60239	3.85764	ENST00000268896.10 M8/D6	0.0244459	ENSG00000141179.14	PCTP	protein_coding	PCTP-201	protein_coding	1972	6	5	Low Confidence
ENST00000269097.9	D5/D6	3	1.30059	0.379164	0.230558	ENST00000269097.9 D5/D6	0.0163142	ENSG00000141349.10	G6PC3	protein_coding	G6PC3-201	protein_coding	1573	6	5	High Confidence
ENST00000269142.10	D5/D6	3	1.59531	0.67354	1.44377	ENST00000269142.10 D5/D6	0.00640622	ENSG00000141384.13	TAF4B	protein_coding	TAF4B-201	protein_coding	4751	15	14	High Confidence
ENST00000269214.10	D5/D6	2	1.31511	0.395058	1.33009	ENST00000269214.10 D5/D6	0.103487	ENSG00000141446.11	ESCO1	protein_coding	ESCO1-201	protein_coding	4488	12	11	Low Confidence
ENST00000269221.8	F7/D6	3	0.712697	-0.491441	4.34456	ENST00000269221.8 F7/D6	0.0323717	ENSG00000141452.10	RMC1	protein_coding	RMC1-201	protein_coding	2200	20	19	Low Confidence
ENST00000269243.8	D5/D6	2	0.491957	-1.02713	7.18419	ENST00000269243.8 D5/D6	0.0223522	ENSG00000133026.14	MYH10	protein_coding	MYH10-201	protein_coding	7662	41	40	Low Confidence
ENST00000269243.8	F7/D6	2	1.98417	0.986178	5.70816	ENST00000269243.8 F7/D6	0.00201518	ENSG00000133026.14	MYH10	protein_coding	MYH10-201	protein_coding	7662	41	40	Low Confidence
ENST00000269243.8	M8/D6	2	2.88243	1.52457	6.12964	ENST00000269243.8 M8/D6	0.000177836	ENSG00000133026.14	MYH10	protein_coding	MYH10-201	protein_coding	7662	41	40	Low Confidence
ENST00000269346.9	F7/D6	3	1.89073	0.91868	1.3514	ENST00000269346.9 F7/D6	0.0261144	ENSG00000141540.11	TTYH2	protein_coding	TTYH2-201	protein_coding	3433	14	13	High Confidence
ENST00000269373.11	F7/D6	3	1.28941	0.366142	1.97305	ENST00000269373.11 F7/D6	0.120159	ENSG00000141560.15	FN3KRP	protein_coding	FN3KRP-201	protein_coding	1822	6	5	Medium Confidence
ENST00000269383.8	D5/D6	3	1.69614	0.761234	2.65021	ENST00000269383.8 D5/D6	0.0327461	ENSG00000141569.12	TRIM65	protein_coding	TRIM65-201	protein_coding	3384	6	5	Medium Confidence
ENST00000269385.9	D5/D6	3	2.32156	1.21458	1.90699	ENST00000269385.9 D5/D6	0.00362339	ENSG00000141570.11	CBX8	protein_coding	CBX8-201	protein_coding	3752	5	4	Medium Confidence
ENST00000269397.9	D5/D6	3	1.41155	0.497118	1.05285	ENST00000269397.9 D5/D6	0.039662	ENSG00000141582.15	CBX4	protein_coding	CBX4-201	protein_coding	2675	5	4	High Confidence
ENST00000269576.6	D5/D6	3	0.759571	-0.396885	0.989026	ENST00000269576.6 D5/D6	0.0261691	ENSG00000186395.9	KRT10	protein_coding	KRT10-201	protein_coding	2143	8	7	High Confidence
ENST00000269576.6	M8/D6	3	0.802324	-0.317795	0.599415	ENST00000269576.6 M8/D6	0.0169922	ENSG00000186395.9	KRT10	protein_coding	KRT10-201	protein_coding	2143	8	7	High Confidence
ENST00000269593.5	D5/D6	3	0.683454	-0.549529	1.75568	ENST00000269593.5 D5/D6	0.0128326	ENSG00000141753.7	IGFBP4	protein_coding	IGFBP4-201	protein_coding	2205	4	3	High Confidence
ENST00000269601.10	D5/D6	3	1.36503	0.448907	0.436825	ENST00000269601.10 D5/D6	0.0473173	ENSG00000141759.15	TXNL4A	protein_coding	TXNL4A-201	protein_coding	3472	3	2	High Confidence
ENST00000269701.7	F7/D6	2	0.726053	-0.461875	0.551149	ENST00000269701.7 F7/D6	0.0509807	ENSG00000105127.10	AKAP8	protein_coding	AKAP8-201	protein_coding	3665	14	13	Low Confidence
ENST00000269740.9	D5/D6	3	1.36724	0.451206	0.62728	ENST00000269740.9 D5/D6	0.0446319	ENSG00000141873.11	SLC39A3	protein_coding	SLC39A3-201	protein_coding	1367	3	2	High Confidence
ENST00000269856.5	D5/D6	2	1.30069	0.37815	3.95905	ENST00000269856.5 D5/D6	0.0831373	ENSG00000141965.5	FEM1A	protein_coding	FEM1A-201	protein_coding	9540	1	0	Low Confidence
ENST00000269886.7	D5/D6	2	1.75285	0.8097	0.124821	ENST00000269886.7 D5/D6	0.00203668	ENSG00000141985.9	SH3GL1	protein_coding	SH3GL1-201	protein_coding	2516	10	9	Low Confidence
ENST00000269932.10	D5/D6	3	1.8263	0.868723	1.17031	ENST00000269932.10 D5/D6	0.00550857	ENSG00000105676.14	ARMC6	protein_coding	ARMC6-201	protein_coding	2412	8	7	High Confidence
ENST00000269980.7	M8/D6	4	1.28405	0.360148	1.58281	ENST00000269980.7 M8/D6	0.00842971	ENSG00000248098.12	BCKDHA	protein_coding	BCKDHA-201	protein_coding	1742	9	8	High Confidence
ENST00000270066.11	D5/D6	2	0.707644	-0.498965	0.926066	ENST00000270066.11 D5/D6	0.0186412	ENSG00000105771.14	SMG9	protein_coding	SMG9-201	protein_coding	5491	14	13	Low Confidence
ENST00000270142.11	D5/D6	2	1.19575	0.256864	3.82032	ENST00000270142.11 D5/D6	0.0737319	ENSG00000142168.15	SOD1	protein_coding	SOD1-201	protein_coding	895	5	4	Low Confidence
ENST00000270142.11	M8/D6	3	0.762352	-0.391498	0.437965	ENST00000270142.11 M8/D6	0.00462088	ENSG00000142168.15	SOD1	protein_coding	SOD1-201	protein_coding	895	5	4	High Confidence
ENST00000270176.10	D5/D6	3	0.785463	-0.348947	1.9838	ENST00000270176.10 D5/D6	0.0322751	ENSG00000142186.18	SCYL1	protein_coding	SCYL1-201	protein_coding	2636	18	17	Medium Confidence
ENST00000270221.11	D5/D6	3	0.883961	-0.177956	0.260281	ENST00000270221.11 D5/D6	0.0231289	ENSG00000142227.11	EMP3	protein_coding	EMP3-201	protein_coding	649	5	4	High Confidence
ENST00000270225.12	D5/D6	3	1.26249	0.336202	0.694918	ENST00000270225.12 D5/D6	0.0144592	ENSG00000142230.13	SAE1	protein_coding	SAE1-201	protein_coding	2522	9	8	High Confidence
ENST00000270257.9	D5/D6	2	0.837583	-0.255899	1.67891	ENST00000270257.9 D5/D6	0.0539469	ENSG00000142252.11	GEMIN7	protein_coding	GEMIN7-201	protein_coding	1653	3	2	Low Confidence
ENST00000270257.9	M8/D6	2	0.724623	-0.465566	3.46938	ENST00000270257.9 M8/D6	0.024111	ENSG00000142252.11	GEMIN7	protein_coding	GEMIN7-201	protein_coding	1653	3	2	Medium Confidence
ENST00000270357.10	F7/D6	2	0.634833	-0.655742	1.63027	ENST00000270357.10 F7/D6	0.00348805	ENSG00000142327.13	RNPEPL1	protein_coding	RNPEPL1-201	protein_coding	5761	11	10	Low Confidence
ENST00000270451.6	D5/D6	3	1.48271	0.568112	0.913985	ENST00000270451.6 D5/D6	0.00161343	ENSG00000171425.10	ZNF581	protein_coding	ZNF581-201	protein_coding	1197	2	1	High Confidence
ENST00000270460.11	D5/D6	2	0.851744	-0.232329	3.37106	ENST00000270460.11 D5/D6	0.0971923	ENSG00000063245.15	EPN1	protein_coding	EPN1-202	protein_coding	16219	11	10	Medium Confidence
ENST00000270517.12	D5/D6	2	1.22331	0.290504	1.97616	ENST00000270517.12 D5/D6	0.131919	ENSG00000130159.15	ECSIT	protein_coding	ECSIT-202	protein_coding	1647	8	7	Medium Confidence
ENST00000270538.8	D5/D6	2	1.15886	0.212701	0.227813	ENST00000270538.8 D5/D6	0.0819714	ENSG00000104980.8	TIMM44	protein_coding	TIMM44-201	protein_coding	1843	13	12	Low Confidence
ENST00000270625.7	D5/D6	3	1.23875	0.307757	2.80862	ENST00000270625.7 D5/D6	0.0134283	ENSG00000142534.7	RPS11	protein_coding	RPS11-201	protein_coding	573	5	4	Medium Confidence
ENST00000270708.12	M8/D6	4	0.584322	-0.775237	0.578525	ENST00000270708.12 M8/D6	0.00126593	ENSG00000116213.16	WRAP73	protein_coding	WRAP73-201	protein_coding	1692	12	11	High Confidence
ENST00000270792.10	D5/D6	3	0.873682	-0.194855	0.495322	ENST00000270792.10 D5/D6	0.00218512	ENSG00000142669.15	SH3BGRL3	protein_coding	SH3BGRL3-201	protein_coding	751	3	2	High Confidence
ENST00000270815.5	D5/D6	2	1.31199	0.391684	0.986097	ENST00000270815.5 D5/D6	0.0738915	ENSG00000142686.8	C1orf216	protein_coding	C1orf216-201	protein_coding	2628	2	1	Low Confidence
ENST00000270861.10	M8/D6	3	1.92568	0.944035	3.01954	ENST00000270861.10 M8/D6	0.00387595	ENSG00000142731.11	PLK4	protein_coding	PLK4-201	protein_coding	3838	16	15	Medium Confidence
ENST00000271002.15	D5/D6	2	0.802	-0.31938	3.82098	ENST00000271002.15 D5/D6	0.028207	ENSG00000142856.17	ITGB3BP	protein_coding	ITGB3BP-201	protein_coding	961	9	8	Low Confidence
ENST00000271277.11	D5/D6	2	0.69641	-0.521999	0.355244	ENST00000271277.11 D5/D6	0.0136685	ENSG00000143079.15	CTTNBP2NL	protein_coding	CTTNBP2NL-201	protein_coding	5864	6	5	Low Confidence
ENST00000271324.6	D5/D6	3	0.868782	-0.203244	1.46974	ENST00000271324.6 D5/D6	0.0972017	ENSG00000143119.14	CD53	protein_coding	CD53-201	protein_coding	1505	8	7	High Confidence
ENST00000271324.6	F7/D6	3	0.697456	-0.520383	1.95461	ENST00000271324.6 F7/D6	0.00394461	ENSG00000143119.14	CD53	protein_coding	CD53-201	protein_coding	1505	8	7	Medium Confidence
ENST00000271375.7	D5/D6	3	1.21446	0.280089	1.24265	ENST00000271375.7 D5/D6	0.104198	ENSG00000213064.10	SFT2D2	protein_coding	SFT2D2-201	protein_coding	11040	8	7	High Confidence
ENST00000271375.7	M8/D6	2	0.800994	-0.320264	1.33582	ENST00000271375.7 M8/D6	0.0378166	ENSG00000213064.10	SFT2D2	protein_coding	SFT2D2-201	protein_coding	11040	8	7	Low Confidence
ENST00000271417.8	M8/D6	2	1.62606	0.701336	0.787106	ENST00000271417.8 M8/D6	0.210696	ENSG00000143195.13	ILDR2	protein_coding	ILDR2-201	protein_coding	13360	10	9	Low Confidence
ENST00000271452.8	D5/D6	3	0.618762	-0.693954	3.09604	ENST00000271452.8 D5/D6	0.0583619	ENSG00000143228.13	NUF2	protein_coding	NUF2-201	protein_coding	1964	14	13	Medium Confidence
ENST00000271452.8	M8/D6	3	3.33547	1.73679	2.77033	ENST00000271452.8 M8/D6	0.000138505	ENSG00000143228.13	NUF2	protein_coding	NUF2-201	protein_coding	1964	14	13	Medium Confidence
ENST00000271526.9	M8/D6	3	0.916852	-0.125289	0.592261	ENST00000271526.9 M8/D6	0.0302123	ENSG00000143294.15	PRCC	protein_coding	PRCC-201	protein_coding	2068	7	6	High Confidence
ENST00000271638.3	M8/D6	3	1.21292	0.278456	0.437866	ENST00000271638.3 M8/D6	0.0126017	ENSG00000163191.6	S100A11	protein_coding	S100A11-201	protein_coding	563	3	2	High Confidence
ENST00000271764.7	F7/D6	2	1.12887	0.174877	0.0414224	ENST00000271764.7 F7/D6	0.182393	ENSG00000143486.16	EIF2D	protein_coding	EIF2D-201	protein_coding	2011	15	14	Low Confidence
ENST00000271764.7	M8/D6	4	0.785231	-0.349039	1.0247	ENST00000271764.7 M8/D6	0.00199509	ENSG00000143486.16	EIF2D	protein_coding	EIF2D-201	protein_coding	2011	15	14	High Confidence
ENST00000271843.9	F7/D6	3	0.869326	-0.202223	1.15014	ENST00000271843.9 F7/D6	0.0420427	ENSG00000143543.15	JTB	protein_coding	JTB-201	protein_coding	1273	5	4	High Confidence
ENST00000271843.9	M8/D6	3	0.814983	-0.295916	2.27481	ENST00000271843.9 M8/D6	0.0242119	ENSG00000143543.15	JTB	protein_coding	JTB-201	protein_coding	1273	5	4	Medium Confidence
ENST00000271877.11	D5/D6	2	2.03314	1.02257	3.97056	ENST00000271877.11 D5/D6	0.0201203	ENSG00000143569.19	UBAP2L	protein_coding	UBAP2L-201	protein_coding	3997	27	26	Low Confidence
ENST00000271915.9	D5/D6	2	0.45649	-1.1322	3.44109	ENST00000271915.9 D5/D6	0.0062373	ENSG00000143603.19	KCNN3	protein_coding	KCNN3-201	protein_coding	13034	8	7	Medium Confidence
ENST00000272065.10	D5/D6	2	1.15431	0.207004	0.579242	ENST00000272065.10 D5/D6	0.0400361	ENSG00000143727.16	ACP1	protein_coding	ACP1-201	protein_coding	1474	6	5	Low Confidence
ENST00000272102.10	M8/D6	3	0.895099	-0.15996	0.74464	ENST00000272102.10 M8/D6	0.066735	ENSG00000143761.17	ARF1	protein_coding	ARF1-201	protein_coding	1840	5	4	High Confidence
ENST00000272163.9	F7/D6	2	0.906791	-0.141204	0.798002	ENST00000272163.9 F7/D6	0.383711	ENSG00000143815.15	LBR	protein_coding	LBR-201	protein_coding	3748	14	13	Low Confidence
ENST00000272227.8	D5/D6	4	0.781448	-0.355791	0.243646	ENST00000272227.8 D5/D6	0.00136772	ENSG00000143870.13	PDIA6	protein_coding	PDIA6-201	protein_coding	2279	13	12	High Confidence
ENST00000272227.8	M8/D6	4	0.622585	-0.683975	1.21432	ENST00000272227.8 M8/D6	7.50153e-05	ENSG00000143870.13	PDIA6	protein_coding	PDIA6-201	protein_coding	2279	13	12	High Confidence
ENST00000272233.6	F7/D6	3	0.584467	-0.775063	1.3381	ENST00000272233.6 F7/D6	0.0583135	ENSG00000143878.10	RHOB	protein_coding	RHOB-201	protein_coding	2367	1	0	High Confidence
ENST00000272252.10	D5/D6	4	0.248569	-2.00848	0.974846	ENST00000272252.10 D5/D6	1.75219e-05	ENSG00000143891.17	GALM	protein_coding	GALM-201	protein_coding	2277	7	6	High Confidence
ENST00000272252.10	F7/D6	4	0.537308	-0.896975	1.93503	ENST00000272252.10 F7/D6	0.000662632	ENSG00000143891.17	GALM	protein_coding	GALM-201	protein_coding	2277	7	6	Medium Confidence
ENST00000272252.10	M8/D6	4	0.485121	-1.04709	4.12023	ENST00000272252.10 M8/D6	0.000337847	ENSG00000143891.17	GALM	protein_coding	GALM-201	protein_coding	2277	7	6	Low Confidence
ENST00000272274.8	F7/D6	3	2.03767	1.00852	10.8081	ENST00000272274.8 F7/D6	0.00376152	ENSG00000122026.11	RPL21	protein_coding	RPL21-201	protein_coding	616	6	5	Low Confidence
ENST00000272317.11	D5/D6	2	1.22424	0.291854	0.712516	ENST00000272317.11 D5/D6	0.0932762	ENSG00000143947.15	RPS27A	protein_coding	RPS27A-201	protein_coding	785	6	5	Low Confidence
ENST00000272424.11	F7/D6	3	0.76548	-0.385584	0.376243	ENST00000272424.11 F7/D6	0.0337804	ENSG00000144034.16	TPRKB	protein_coding	TPRKB-201	protein_coding	664	5	4	High Confidence
ENST00000272430.10	D5/D6	3	0.601122	-0.735167	2.50801	ENST00000272430.10 D5/D6	0.0378441	ENSG00000114993.17	RTKN	protein_coding	RTKN-202	protein_coding	2221	12	11	Medium Confidence
ENST00000272430.10	M8/D6	3	2.49559	1.31904	1.54509	ENST00000272430.10 M8/D6	0.000685891	ENSG00000114993.17	RTKN	protein_coding	RTKN-202	protein_coding	2221	12	11	High Confidence
ENST00000272444.8	D5/D6	3	1.3247	0.403438	3.91715	ENST00000272444.8 D5/D6	0.00213079	ENSG00000144048.11	DUSP11	protein_coding	DUSP11-201	protein_coding	1570	9	8	Low Confidence
ENST00000272519.10	D5/D6	4	0.622155	-0.684835	0.919292	ENST00000272519.10 D5/D6	0.000793891	ENSG00000144118.14	RALB	protein_coding	RALB-201	protein_coding	2247	5	4	High Confidence
ENST00000272519.10	M8/D6	3	1.20737	0.271842	0.394679	ENST00000272519.10 M8/D6	0.0697137	ENSG00000144118.14	RALB	protein_coding	RALB-201	protein_coding	2247	5	4	High Confidence
ENST00000272521.7	D5/D6	2	1.45786	0.543667	1.61448	ENST00000272521.7 D5/D6	0.165785	ENSG00000144120.13	TMEM177	protein_coding	TMEM177-201	protein_coding	1363	2	1	Low Confidence
ENST00000272542.8	F7/D6	3	0.816724	-0.292161	0.748831	ENST00000272542.8 F7/D6	0.0654959	ENSG00000144136.11	SLC20A1	protein_coding	SLC20A1-201	protein_coding	3297	11	10	High Confidence
ENST00000272638.14	D5/D6	3	0.882539	-0.180339	0.701794	ENST00000272638.14 D5/D6	0.0492555	ENSG00000144224.17	UBXN4	protein_coding	UBXN4-201	protein_coding	3771	13	12	High Confidence
ENST00000272638.14	M8/D6	3	0.866266	-0.207828	2.23289	ENST00000272638.14 M8/D6	0.0318551	ENSG00000144224.17	UBXN4	protein_coding	UBXN4-201	protein_coding	3771	13	12	Medium Confidence
ENST00000272645.9	M8/D6	2	1.11108	0.146137	8.96399	ENST00000272645.9 M8/D6	0.366769	ENSG00000144231.11	POLR2D	protein_coding	POLR2D-201	protein_coding	5038	4	3	Low Confidence
ENST00000272902.10	M8/D6	3	0.762823	-0.390921	1.53545	ENST00000272902.10 M8/D6	0.0668877	ENSG00000144455.14	SUMF1	protein_coding	SUMF1-201	protein_coding	2147	9	8	High Confidence
ENST00000272983.12	F7/D6	3	1.53002	0.613038	1.87734	ENST00000272983.12 F7/D6	0.0571728	ENSG00000115685.15	PPP1R7	protein_coding	PPP1R7-202	protein_coding	1954	9	8	Medium Confidence
ENST00000272983.12	M8/D6	3	2.23008	1.15626	2.38488	ENST00000272983.12 M8/D6	0.00109112	ENSG00000115685.15	PPP1R7	protein_coding	PPP1R7-202	protein_coding	1954	9	8	Medium Confidence
ENST00000273038.7	D5/D6	2	3.56339	1.83233	3.57257	ENST00000273038.7 D5/D6	0.00390095	ENSG00000144560.16	VGLL4	protein_coding	VGLL4-201	protein_coding	3725	6	5	Medium Confidence
ENST00000273064.11	F7/D6	2	1.29666	0.374703	1.12899	ENST00000273064.11 F7/D6	0.130152	ENSG00000144580.14	CNOT9	protein_coding	CNOT9-201	protein_coding	3820	8	7	Low Confidence
ENST00000273130.9	M8/D6	2	1.1806	0.239514	0.108983	ENST00000273130.9 M8/D6	0.0589472	ENSG00000144635.9	DYNC1LI1	protein_coding	DYNC1LI1-201	protein_coding	2485	13	12	Low Confidence
ENST00000273153.10	D5/D6	3	0.754582	-0.406262	0.275073	ENST00000273153.10 D5/D6	0.00700236	ENSG00000144655.15	CSRNP1	protein_coding	CSRNP1-201	protein_coding	3164	5	4	High Confidence
ENST00000273153.10	F7/D6	4	1.59547	0.673294	1.77551	ENST00000273153.10 F7/D6	0.00169731	ENSG00000144655.15	CSRNP1	protein_coding	CSRNP1-201	protein_coding	3164	5	4	High Confidence
ENST00000273153.10	M8/D6	3	1.38498	0.469826	0.505152	ENST00000273153.10 M8/D6	0.00852067	ENSG00000144655.15	CSRNP1	protein_coding	CSRNP1-201	protein_coding	3164	5	4	High Confidence
ENST00000273156.11	D5/D6	3	0.782471	-0.354116	1.24987	ENST00000273156.11 D5/D6	0.146404	ENSG00000093183.14	SEC22C	protein_coding	SEC22C-202	protein_coding	1608	7	6	High Confidence
ENST00000273258.4	M8/D6	3	0.866683	-0.206757	1.52705	ENST00000273258.4 M8/D6	0.0574297	ENSG00000144746.7	ARL6IP5	protein_coding	ARL6IP5-201	protein_coding	2134	3	2	High Confidence
ENST00000273308.9	F7/D6	2	0.82674	-0.274535	0.741784	ENST00000273308.9 F7/D6	0.0616717	ENSG00000257727.6	CNPY2	protein_coding	CNPY2-201	protein_coding	1450	6	5	Low Confidence
ENST00000273308.9	M8/D6	3	0.593125	-0.754945	3.09287	ENST00000273308.9 M8/D6	0.000188984	ENSG00000257727.6	CNPY2	protein_coding	CNPY2-201	protein_coding	1450	6	5	Medium Confidence
ENST00000273371.9	D5/D6	4	0.673924	-0.569756	1.38995	ENST00000273371.9 D5/D6	0.00472509	ENSG00000144837.9	PLA1A	protein_coding	PLA1A-201	protein_coding	1743	11	10	High Confidence
ENST00000273371.9	F7/D6	4	0.365533	-1.45439	3.34059	ENST00000273371.9 F7/D6	6.87193e-06	ENSG00000144837.9	PLA1A	protein_coding	PLA1A-201	protein_coding	1743	11	10	Medium Confidence
ENST00000273390.9	M8/D6	2	2.88844	1.52913	4.00695	ENST00000273390.9 M8/D6	0.0199465	ENSG00000183833.16	CFAP91	protein_coding	CFAP91-201	protein_coding	4433	18	17	Low Confidence
ENST00000273398.8	D5/D6	2	0.828505	-0.271417	0.00269547	ENST00000273398.8 D5/D6	0.115869	ENSG00000114573.12	ATP6V1A	protein_coding	ATP6V1A-201	protein_coding	4575	15	14	Low Confidence
ENST00000273398.8	M8/D6	3	1.3403	0.422411	0.998791	ENST00000273398.8 M8/D6	0.0292481	ENSG00000114573.12	ATP6V1A	protein_coding	ATP6V1A-201	protein_coding	4575	15	14	High Confidence
ENST00000273550.12	D5/D6	3	0.692388	-0.532115	3.45762	ENST00000273550.12 D5/D6	3.27088e-05	ENSG00000167996.16	FTH1	protein_coding	FTH1-201	protein_coding	1203	4	3	Medium Confidence
ENST00000273588.9	D5/D6	3	2.0198	1.01001	5.37058	ENST00000273588.9 D5/D6	0.0803597	ENSG00000145020.16	AMT	protein_coding	AMT-201	protein_coding	1997	9	8	Low Confidence
ENST00000273668.7	D5/D6	3	0.94518	-0.0813677	0.447982	ENST00000273668.7 D5/D6	0.0370381	ENSG00000145088.9	EAF2	protein_coding	EAF2-201	protein_coding	998	6	5	High Confidence
ENST00000273668.7	F7/D6	4	1.34083	0.420345	3.66502	ENST00000273668.7 F7/D6	0.038275	ENSG00000145088.9	EAF2	protein_coding	EAF2-201	protein_coding	998	6	5	Medium Confidence
ENST00000273668.7	M8/D6	4	0.626388	-0.677756	3.73428	ENST00000273668.7 M8/D6	0.000754552	ENSG00000145088.9	EAF2	protein_coding	EAF2-201	protein_coding	998	6	5	Low Confidence
ENST00000273859.8	D5/D6	2	0.764406	-0.387817	1.78212	ENST00000273859.8 D5/D6	0.0609172	ENSG00000145246.14	ATP10D	protein_coding	ATP10D-201	protein_coding	6668	23	22	Low Confidence
ENST00000273859.8	M8/D6	2	0.725297	-0.464073	3.15259	ENST00000273859.8 M8/D6	0.0477414	ENSG00000145246.14	ATP10D	protein_coding	ATP10D-201	protein_coding	6668	23	22	Medium Confidence
ENST00000273968.5	M8/D6	2	0.788921	-0.342061	0.447263	ENST00000273968.5 M8/D6	0.015825	ENSG00000145337.5	PYURF	protein_coding	PYURF-201	protein_coding	1311	2	1	Low Confidence
ENST00000273986.10	F7/D6	3	0.771032	-0.375257	0.911062	ENST00000273986.10 F7/D6	0.0100083	ENSG00000145354.12	CISD2	protein_coding	CISD2-201	protein_coding	5878	3	2	High Confidence
ENST00000273986.10	M8/D6	2	0.843303	-0.245976	1.16461	ENST00000273986.10 M8/D6	0.0410306	ENSG00000145354.12	CISD2	protein_coding	CISD2-201	protein_coding	5878	3	2	Low Confidence
ENST00000274000.10	M8/D6	2	0.834825	-0.260669	1.72632	ENST00000274000.10 M8/D6	0.183302	ENSG00000138660.12	AP1AR	protein_coding	AP1AR-201	protein_coding	5915	10	9	Low Confidence
ENST00000274026.10	M8/D6	4	2.84759	1.50809	2.7924	ENST00000274026.10 M8/D6	9.98185e-05	ENSG00000145386.11	CCNA2	protein_coding	CCNA2-201	protein_coding	2748	8	7	Medium Confidence
ENST00000274031.8	D5/D6	3	2.22237	1.1504	3.44165	ENST00000274031.8 D5/D6	0.00379216	ENSG00000145391.14	SETD7	protein_coding	SETD7-201	protein_coding	6808	8	7	Medium Confidence
ENST00000274031.8	M8/D6	3	0.466502	-1.10018	0.984771	ENST00000274031.8 M8/D6	0.0151364	ENSG00000145391.14	SETD7	protein_coding	SETD7-201	protein_coding	6808	8	7	High Confidence
ENST00000274054.3	D5/D6	2	1.11764	0.160383	1.04437	ENST00000274054.3 D5/D6	0.146243	ENSG00000145414.9	NAF1	protein_coding	NAF1-201	protein_coding	1876	8	7	Low Confidence
ENST00000274065.9	D5/D6	4	1.27688	0.350715	2.99202	ENST00000274065.9 D5/D6	0.00045642	ENSG00000145425.10	RPS3A	protein_coding	RPS3A-201	protein_coding	869	6	5	Medium Confidence
ENST00000274065.9	F7/D6	4	1.07897	0.108726	2.08958	ENST00000274065.9 F7/D6	0.0880836	ENSG00000145425.10	RPS3A	protein_coding	RPS3A-201	protein_coding	869	6	5	Medium Confidence
ENST00000274065.9	M8/D6	4	0.827401	-0.273683	1.25369	ENST00000274065.9 M8/D6	0.00291301	ENSG00000145425.10	RPS3A	protein_coding	RPS3A-201	protein_coding	869	6	5	High Confidence
ENST00000274137.10	M8/D6	3	0.829664	-0.269437	0.502031	ENST00000274137.10 M8/D6	0.0610948	ENSG00000145494.12	NDUFS6	protein_coding	NDUFS6-201	protein_coding	518	4	3	High Confidence
ENST00000274140.10	D5/D6	2	0.891905	-0.165924	3.50557	ENST00000274140.10 D5/D6	0.0564317	ENSG00000145495.16	MARCHF6	protein_coding	MARCHF6-201	protein_coding	9641	26	25	Medium Confidence
ENST00000274140.10	F7/D6	2	0.843677	-0.245237	0.00078039	ENST00000274140.10 F7/D6	0.0457206	ENSG00000145495.16	MARCHF6	protein_coding	MARCHF6-201	protein_coding	9641	26	25	Low Confidence
ENST00000274192.7	M8/D6	2	0.856428	-0.223979	2.30449	ENST00000274192.7 M8/D6	0.341287	ENSG00000145545.12	SRD5A1	protein_coding	SRD5A1-201	protein_coding	7035	5	4	Medium Confidence
ENST00000274242.10	D5/D6	3	1.15327	0.203688	3.81087	ENST00000274242.10 D5/D6	0.00596102	ENSG00000145592.14	RPL37	protein_coding	RPL37-201	protein_coding	7573	4	3	Low Confidence
ENST00000274242.10	F7/D6	3	1.14934	0.200668	0.984274	ENST00000274242.10 F7/D6	0.00853072	ENSG00000145592.14	RPL37	protein_coding	RPL37-201	protein_coding	7573	4	3	High Confidence
ENST00000274364.11	D5/D6	3	0.707145	-0.503587	5.11672	ENST00000274364.11 D5/D6	0.00793076	ENSG00000145703.17	IQGAP2	protein_coding	IQGAP2-201	protein_coding	5808	36	35	Low Confidence
ENST00000274364.11	M8/D6	3	1.5185	0.596489	6.64677	ENST00000274364.11 M8/D6	0.0150277	ENSG00000145703.17	IQGAP2	protein_coding	IQGAP2-201	protein_coding	5808	36	35	Low Confidence
ENST00000274458.9	F7/D6	2	0.814643	-0.295819	0.908188	ENST00000274458.9 F7/D6	0.104916	ENSG00000145781.9	COMMD10	protein_coding	COMMD10-201	protein_coding	1435	7	6	Low Confidence
ENST00000274458.9	M8/D6	2	0.758457	-0.39891	0.821817	ENST00000274458.9 M8/D6	0.0225368	ENSG00000145781.9	COMMD10	protein_coding	COMMD10-201	protein_coding	1435	7	6	Low Confidence
ENST00000274496.10	D5/D6	3	0.820925	-0.284725	0.578816	ENST00000274496.10 D5/D6	0.0874727	ENSG00000145817.17	YIPF5	protein_coding	YIPF5-201	protein_coding	3144	6	5	High Confidence
ENST00000274606.8	D5/D6	3	1.21145	0.276734	0.19935	ENST00000274606.8 D5/D6	0.0153932	ENSG00000145912.10	NHP2	protein_coding	NHP2-201	protein_coding	780	4	3	High Confidence
ENST00000274629.9	F7/D6	2	8.66602	3.07997	21.8822	ENST00000274629.9 F7/D6	0.000121932	ENSG00000145936.9	KCNMB1	protein_coding	KCNMB1-201	protein_coding	4742	4	3	Low Confidence
ENST00000274629.9	M8/D6	2	6.51519	2.67044	21.2612	ENST00000274629.9 M8/D6	0.000763074	ENSG00000145936.9	KCNMB1	protein_coding	KCNMB1-201	protein_coding	4742	4	3	Low Confidence
ENST00000274680.9	D5/D6	4	1.33449	0.416195	0.670404	ENST00000274680.9 D5/D6	0.0205603	ENSG00000145982.13	FARS2	protein_coding	FARS2-201	protein_coding	1679	7	6	High Confidence
ENST00000274680.9	M8/D6	3	0.794537	-0.332019	1.18696	ENST00000274680.9 M8/D6	0.0406948	ENSG00000145982.13	FARS2	protein_coding	FARS2-201	protein_coding	1679	7	6	High Confidence
ENST00000274712.8	D5/D6	3	0.862241	-0.213858	0.372396	ENST00000274712.8 D5/D6	0.0228934	ENSG00000146007.11	ZMAT2	protein_coding	ZMAT2-201	protein_coding	1544	6	5	High Confidence
ENST00000274787.3	F7/D6	3	1.07967	0.110352	1.27653	ENST00000274787.3 F7/D6	0.0530651	ENSG00000146066.3	HIGD2A	protein_coding	HIGD2A-201	protein_coding	654	2	1	High Confidence
ENST00000274811.9	D5/D6	3	1.6104	0.686963	1.79308	ENST00000274811.9 D5/D6	0.0113052	ENSG00000146083.12	RNF44	protein_coding	RNF44-201	protein_coding	4122	11	10	Medium Confidence
ENST00000274813.4	M8/D6	3	0.820896	-0.286574	3.53553	ENST00000274813.4 M8/D6	0.16765	ENSG00000146085.8	MMUT	protein_coding	MMUT-201	protein_coding	3811	13	12	Medium Confidence
ENST00000274963.13	D5/D6	2	0.797887	-0.32773	5.24276	ENST00000274963.13 D5/D6	0.0564916	ENSG00000146192.15	FGD2	protein_coding	FGD2-201	protein_coding	3037	16	15	Low Confidence
ENST00000274963.13	F7/D6	3	0.659947	-0.613985	10.2646	ENST00000274963.13 F7/D6	0.0205239	ENSG00000146192.15	FGD2	protein_coding	FGD2-201	protein_coding	3037	16	15	Low Confidence
ENST00000275034.5	D5/D6	2	1.27075	0.345627	0.880792	ENST00000275034.5 D5/D6	0.00823996	ENSG00000146247.15	PHIP	protein_coding	PHIP-201	protein_coding	11926	40	39	Low Confidence
ENST00000275036.11	D5/D6	2	1.17852	0.236453	2.70395	ENST00000275036.11 D5/D6	0.12016	ENSG00000118418.16	HMGN3	protein_coding	HMGN3-201	protein_coding	831	6	5	Medium Confidence
ENST00000275036.11	F7/D6	3	0.837364	-0.256208	0.966465	ENST00000275036.11 F7/D6	0.145391	ENSG00000118418.16	HMGN3	protein_coding	HMGN3-201	protein_coding	831	6	5	High Confidence
ENST00000275072.5	D5/D6	3	2.57793	1.36429	3.6938	ENST00000275072.5 D5/D6	6.97486e-05	ENSG00000146281.6	PM20D2	protein_coding	PM20D2-201	protein_coding	4703	7	6	Medium Confidence
ENST00000275227.9	D5/D6	3	1.36656	0.44981	2.23928	ENST00000275227.9 D5/D6	0.0773607	ENSG00000146409.12	SLC18B1	protein_coding	SLC18B1-201	protein_coding	2452	14	13	Medium Confidence
ENST00000275227.9	F7/D6	2	0.755475	-0.406226	4.82507	ENST00000275227.9 F7/D6	0.230245	ENSG00000146409.12	SLC18B1	protein_coding	SLC18B1-201	protein_coding	2452	14	13	Low Confidence
ENST00000275364.8	D5/D6	3	0.765315	-0.391136	5.90762	ENST00000275364.8 D5/D6	0.113626	ENSG00000146535.14	GNA12	protein_coding	GNA12-201	protein_coding	4369	4	3	Low Confidence
ENST00000275364.8	F7/D6	3	0.706242	-0.502191	1.71179	ENST00000275364.8 F7/D6	0.0776267	ENSG00000146535.14	GNA12	protein_coding	GNA12-201	protein_coding	4369	4	3	High Confidence
ENST00000275418.13	D5/D6	2	1.82001	0.862732	4.09563	ENST00000275418.13 D5/D6	0.0238807	ENSG00000117868.18	ESYT2	protein_coding	ESYT2-202	protein_coding	5902	23	22	Low Confidence
ENST00000275517.8	M8/D6	3	1.96145	0.971906	0.310777	ENST00000275517.8 M8/D6	0.00433901	ENSG00000146670.10	CDCA5	protein_coding	CDCA5-201	protein_coding	2475	6	5	High Confidence
ENST00000275603.9	D5/D6	3	1.21571	0.281663	0.951955	ENST00000275603.9 D5/D6	0.0124031	ENSG00000146731.11	CCT6A	protein_coding	CCT6A-201	protein_coding	2584	14	13	High Confidence
ENST00000275635.11	D5/D6	4	0.707485	-0.49989	1.76707	ENST00000275635.11 D5/D6	0.00106012	ENSG00000086730.17	LAT2	protein_coding	LAT2-201	protein_coding	1869	14	13	High Confidence
ENST00000275635.11	F7/D6	3	0.736313	-0.441874	1.35632	ENST00000275635.11 F7/D6	0.00490744	ENSG00000086730.17	LAT2	protein_coding	LAT2-201	protein_coding	1869	14	13	High Confidence
ENST00000275635.11	M8/D6	3	0.741506	-0.431673	1.1922	ENST00000275635.11 M8/D6	0.00585423	ENSG00000086730.17	LAT2	protein_coding	LAT2-201	protein_coding	1869	14	13	High Confidence
ENST00000275767.3	D5/D6	3	0.473677	-1.07855	1.89911	ENST00000275767.3 D5/D6	6.3626e-06	ENSG00000146859.6	TMEM140	protein_coding	TMEM140-201	protein_coding	1997	2	1	Medium Confidence
ENST00000275767.3	F7/D6	3	0.638029	-0.648416	0.869128	ENST00000275767.3 F7/D6	0.000364577	ENSG00000146859.6	TMEM140	protein_coding	TMEM140-201	protein_coding	1997	2	1	High Confidence
ENST00000275767.3	M8/D6	3	0.763739	-0.389376	1.91942	ENST00000275767.3 M8/D6	0.00576358	ENSG00000146859.6	TMEM140	protein_coding	TMEM140-201	protein_coding	1997	2	1	Medium Confidence
ENST00000276055.4	F7/D6	2	0.7549	-0.406358	3.14871	ENST00000276055.4 F7/D6	0.0351312	ENSG00000147119.4	CHST7	protein_coding	CHST7-201	protein_coding	2396	2	1	Medium Confidence
ENST00000276079.13	D5/D6	2	1.17429	0.231639	1.42417	ENST00000276079.13 D5/D6	0.0259809	ENSG00000147140.17	NONO	protein_coding	NONO-201	protein_coding	2661	12	11	Low Confidence
ENST00000276096.10	F7/D6	3	0.581227	-0.782856	0.446177	ENST00000276096.10 F7/D6	0.330198	ENSG00000147155.11	EBP	protein_coding	EBP-201	protein_coding_CDS_not_defined	904	5	4	High Confidence
ENST00000276096.10	M8/D6	3	0.462461	-1.11269	0.814196	ENST00000276096.10 M8/D6	0.0179337	ENSG00000147155.11	EBP	protein_coding	EBP-201	protein_coding_CDS_not_defined	904	5	4	High Confidence
ENST00000276201.7	D5/D6	3	0.404408	-1.31475	7.89908	ENST00000276201.7 D5/D6	0.035199	ENSG00000125351.14	UPF3B	protein_coding	UPF3B-201	protein_coding	2343	11	10	Low Confidence
ENST00000276202.9	D5/D6	2	1.25124	0.322802	2.77123	ENST00000276202.9 D5/D6	0.0947564	ENSG00000147251.16	DOCK11	protein_coding	DOCK11-201	protein_coding	6719	53	52	Medium Confidence
ENST00000276282.7	F7/D6	4	0.555261	-0.849209	1.43677	ENST00000276282.7 F7/D6	0.00449073	ENSG00000147324.11	MFHAS1	protein_coding	MFHAS1-201	protein_coding	6399	3	2	High Confidence
ENST00000276420.9	D5/D6	3	0.526977	-0.924452	1.34635	ENST00000276420.9 D5/D6	0.00545804	ENSG00000147443.13	DOK2	protein_coding	DOK2-201	protein_coding	1766	5	4	High Confidence
ENST00000276420.9	F7/D6	2	1.34795	0.430692	0.98924	ENST00000276420.9 F7/D6	0.0424063	ENSG00000147443.13	DOK2	protein_coding	DOK2-201	protein_coding	1766	5	4	Low Confidence
ENST00000276420.9	M8/D6	2	1.44403	0.527227	6.31049	ENST00000276420.9 M8/D6	0.0385175	ENSG00000147443.13	DOK2	protein_coding	DOK2-201	protein_coding	1766	5	4	Low Confidence
ENST00000276500.4	M8/D6	3	3.49675	1.80434	3.39894	ENST00000276500.4 M8/D6	0.000322057	ENSG00000147509.14	RGS20	protein_coding	RGS20-201	protein_coding	1664	5	4	Medium Confidence
ENST00000276590.5	D5/D6	3	1.3532	0.43541	2.60426	ENST00000276590.5 D5/D6	0.0221218	ENSG00000147592.9	LACTB2	protein_coding	LACTB2-201	protein_coding	1526	7	6	Medium Confidence
ENST00000276704.6	D5/D6	2	0.948667	-0.0760648	0.736527	ENST00000276704.6 D5/D6	0.196029	ENSG00000189376.12	C8orf76	protein_coding	C8orf76-201	protein_coding	1310	6	5	Low Confidence
ENST00000276704.6	M8/D6	3	0.840201	-0.251303	0.871543	ENST00000276704.6 M8/D6	0.0628101	ENSG00000189376.12	C8orf76	protein_coding	C8orf76-201	protein_coding	1310	6	5	High Confidence
ENST00000276893.10	M8/D6	2	0.678855	-0.563852	8.33467	ENST00000276893.10 M8/D6	0.0397841	ENSG00000147854.17	UHRF2	protein_coding	UHRF2-201	protein_coding	3576	16	15	Low Confidence
ENST00000276914.7	D5/D6	4	0.67265	-0.572215	0.815229	ENST00000276914.7 D5/D6	0.000134507	ENSG00000147872.10	PLIN2	protein_coding	PLIN2-201	protein_coding	1897	8	7	High Confidence
ENST00000276914.7	F7/D6	4	0.481699	-1.05392	0.742358	ENST00000276914.7 F7/D6	3.41414e-06	ENSG00000147872.10	PLIN2	protein_coding	PLIN2-201	protein_coding	1897	8	7	High Confidence
ENST00000277010.9	D5/D6	3	1.61006	0.686815	1.4263	ENST00000277010.9 D5/D6	0.000672468	ENSG00000147955.18	SIGMAR1	protein_coding	SIGMAR1-201	protein_coding	1672	4	3	High Confidence
ENST00000277010.9	F7/D6	3	1.41122	0.496735	1.18695	ENST00000277010.9 F7/D6	0.00346528	ENSG00000147955.18	SIGMAR1	protein_coding	SIGMAR1-201	protein_coding	1672	4	3	High Confidence
ENST00000277141.10	D5/D6	2	1.56692	0.637582	11.937	ENST00000277141.10 D5/D6	0.159776	ENSG00000083223.18	TUT7	protein_coding	TUT7-201	protein_coding	5724	28	27	Low Confidence
ENST00000277165.11	D5/D6	3	1.32395	0.40315	3.45865	ENST00000277165.11 D5/D6	0.0121932	ENSG00000048828.18	FAM120A	protein_coding	FAM120A-201	protein_coding	5160	18	17	Medium Confidence
ENST00000277225.10	M8/D6	2	2.61822	1.38855	0.727763	ENST00000277225.10 M8/D6	0.008419	ENSG00000148143.13	ZNF462	protein_coding	ZNF462-201	protein_coding	10345	13	12	Low Confidence
ENST00000277746.11	D5/D6	3	0.785421	-0.348822	1.57972	ENST00000277746.11 D5/D6	0.015226	ENSG00000148572.16	NRBF2	protein_coding	NRBF2-201	protein_coding	1813	4	3	High Confidence
ENST00000277746.11	M8/D6	4	0.757849	-0.400085	0.561436	ENST00000277746.11 M8/D6	0.0103925	ENSG00000148572.16	NRBF2	protein_coding	NRBF2-201	protein_coding	1813	4	3	High Confidence
ENST00000278070.7	D5/D6	3	1.46948	0.555042	1.3421	ENST00000278070.7 D5/D6	0.0809786	ENSG00000148840.11	PPRC1	protein_coding	PPRC1-201	protein_coding	5328	14	13	High Confidence
ENST00000278100.11	D5/D6	3	1.36303	0.446799	0.389108	ENST00000278100.11 D5/D6	0.00651386	ENSG00000107949.17	BCCIP	protein_coding	BCCIP-201	protein_coding	1234	7	6	High Confidence
ENST00000278100.11	F7/D6	3	1.23048	0.299218	0.15286	ENST00000278100.11 F7/D6	0.0454947	ENSG00000107949.17	BCCIP	protein_coding	BCCIP-201	protein_coding	1234	7	6	High Confidence
ENST00000278175.10	F7/D6	2	1.95772	0.968963	1.71479	ENST00000278175.10 F7/D6	0.0229751	ENSG00000148926.10	ADM	protein_coding	ADM-201	protein_coding	1492	4	3	Low Confidence
ENST00000278302.9	D5/D6	3	0.472943	-1.08235	3.81528	ENST00000278302.9 D5/D6	0.137969	ENSG00000121236.21	TRIM6	protein_coding	TRIM6-201	protein_coding	3217	8	7	Low Confidence
ENST00000278302.9	F7/D6	2	1.88622	0.915414	1.06082	ENST00000278302.9 F7/D6	0.0329846	ENSG00000121236.21	TRIM6	protein_coding	TRIM6-201	protein_coding	3217	8	7	Low Confidence
ENST00000278353.10	D5/D6	4	1.25377	0.326262	0.268535	ENST00000278353.10 D5/D6	0.00846266	ENSG00000149084.13	HSD17B12	protein_coding	HSD17B12-201	protein_coding	2396	11	10	High Confidence
ENST00000278412.7	D5/D6	3	1.13045	0.176848	0.584883	ENST00000278412.7 D5/D6	0.0204683	ENSG00000149136.9	SSRP1	protein_coding	SSRP1-201	protein_coding	2831	17	16	High Confidence
ENST00000278422.9	D5/D6	3	1.30111	0.379491	1.31561	ENST00000278422.9 D5/D6	0.0128959	ENSG00000213593.10	TMX2	protein_coding	TMX2-201	protein_coding	1645	8	7	High Confidence
ENST00000278422.9	M8/D6	3	0.789653	-0.3408	0.788021	ENST00000278422.9 M8/D6	0.0166629	ENSG00000213593.10	TMX2	protein_coding	TMX2-201	protein_coding	1645	8	7	High Confidence
ENST00000278426.8	D5/D6	4	2.03597	1.02552	0.958595	ENST00000278426.8 D5/D6	0.000105785	ENSG00000149150.9	SLC43A1	protein_coding	SLC43A1-201	protein_coding	2514	15	14	High Confidence
ENST00000278483.8	D5/D6	3	0.912827	-0.131902	1.47166	ENST00000278483.8 D5/D6	0.0295205	ENSG00000149196.17	HIKESHI	protein_coding	HIKESHI-201	protein_coding	1108	5	4	High Confidence
ENST00000278505.5	D5/D6	4	0.635974	-0.655744	3.50713	ENST00000278505.5 D5/D6	0.013647	ENSG00000149218.5	ENDOD1	protein_coding	ENDOD1-201	protein_coding	4651	2	1	Medium Confidence
ENST00000278505.5	F7/D6	4	0.690205	-0.536305	2.53657	ENST00000278505.5 F7/D6	0.050331	ENSG00000149218.5	ENDOD1	protein_coding	ENDOD1-201	protein_coding	4651	2	1	Medium Confidence
ENST00000278505.5	M8/D6	2	0.831532	-0.266157	0.0543921	ENST00000278505.5 M8/D6	0.107377	ENSG00000149218.5	ENDOD1	protein_coding	ENDOD1-201	protein_coding	4651	2	1	Low Confidence
ENST00000278840.9	D5/D6	3	0.664079	-0.59124	2.1468	ENST00000278840.9 D5/D6	0.00238318	ENSG00000134824.14	FADS2	protein_coding	FADS2-202	protein_coding	3091	12	11	Medium Confidence
ENST00000278840.9	F7/D6	2	1.15035	0.201263	3.36152	ENST00000278840.9 F7/D6	0.0860747	ENSG00000134824.14	FADS2	protein_coding	FADS2-202	protein_coding	3091	12	11	Medium Confidence
ENST00000278840.9	M8/D6	2	1.28925	0.366529	0.254795	ENST00000278840.9 M8/D6	0.0462027	ENSG00000134824.14	FADS2	protein_coding	FADS2-202	protein_coding	3091	12	11	Low Confidence
ENST00000278856.9	D5/D6	2	1.58499	0.659999	7.86561	ENST00000278856.9 D5/D6	0.00554299	ENSG00000133316.16	WDR74	protein_coding	WDR74-201	protein_coding	1219	11	10	Low Confidence
ENST00000278919.8	D5/D6	3	0.637341	-0.650296	1.72242	ENST00000278919.8 D5/D6	0.0170611	ENSG00000149557.14	FEZ1	protein_coding	FEZ1-201	protein_coding	4583	10	9	High Confidence
ENST00000278919.8	F7/D6	3	1.72739	0.787025	3.29811	ENST00000278919.8 F7/D6	0.00203372	ENSG00000149557.14	FEZ1	protein_coding	FEZ1-201	protein_coding	4583	10	9	Medium Confidence
ENST00000278919.8	M8/D6	3	2.6876	1.42605	1.37957	ENST00000278919.8 M8/D6	0.000103138	ENSG00000149557.14	FEZ1	protein_coding	FEZ1-201	protein_coding	4583	10	9	High Confidence
ENST00000279147.9	D5/D6	3	1.08376	0.114599	3.13848	ENST00000279147.9 D5/D6	0.165129	ENSG00000149716.13	LTO1	protein_coding	LTO1-201	protein_coding	2484	5	4	Medium Confidence
ENST00000279242.7	D5/D6	2	0.85816	-0.220702	0.527559	ENST00000279242.7 D5/D6	0.0804471	ENSG00000149792.9	MRPL49	protein_coding	MRPL49-201	protein_coding	2026	4	3	Low Confidence
ENST00000279249.3	F7/D6	2	1.71821	0.777542	6.82293	ENST00000279249.3 F7/D6	0.0724697	ENSG00000149798.5	CDC42EP2	protein_coding	CDC42EP2-201	protein_coding	1963	2	1	Low Confidence
ENST00000279281.8	F7/D6	2	1.17174	0.22865	0.181412	ENST00000279281.8 F7/D6	0.0360689	ENSG00000149823.9	VPS51	protein_coding	VPS51-201	protein_coding	2661	10	9	Low Confidence
ENST00000279396.11	D5/D6	3	0.859599	-0.218364	0.827597	ENST00000279396.11 D5/D6	0.0597111	ENSG00000149932.17	TMEM219	protein_coding	TMEM219-201	protein_coding	946	6	5	High Confidence
ENST00000279550.11	D5/D6	3	1.39147	0.476276	1.5197	ENST00000279550.11 D5/D6	0.0358434	ENSG00000060138.13	YBX3	protein_coding	YBX3-202	protein_coding	1708	9	8	High Confidence
ENST00000279839.8	D5/D6	3	1.01426	0.0200371	1.66707	ENST00000279839.8 D5/D6	0.055404	ENSG00000150316.12	CWC15	protein_coding	CWC15-201	protein_coding	1522	7	6	High Confidence
ENST00000279873.12	M8/D6	2	0.739217	-0.436193	1.90933	ENST00000279873.12 M8/D6	0.00977455	ENSG00000150347.17	ARID5B	protein_coding	ARID5B-201	protein_coding	7492	10	9	Medium Confidence
ENST00000280083.7	M8/D6	2	0.784556	-0.35009	0.735023	ENST00000280083.7 M8/D6	0.0141006	ENSG00000150527.18	MIA2	protein_coding	MIA2-202	protein_coding	3860	24	23	Low Confidence
ENST00000280154.12	M8/D6	3	0.767887	-0.381119	0.774079	ENST00000280154.12 M8/D6	0.00602181	ENSG00000150593.18	PDCD4	protein_coding	PDCD4-201	protein_coding	3481	12	11	High Confidence
ENST00000280326.9	D5/D6	4	1.319	0.398844	1.64878	ENST00000280326.9 D5/D6	0.000420032	ENSG00000150753.12	CCT5	protein_coding	CCT5-201	protein_coding	3293	11	10	High Confidence
ENST00000280326.9	F7/D6	2	0.911397	-0.133849	0.053064	ENST00000280326.9 F7/D6	0.0468092	ENSG00000150753.12	CCT5	protein_coding	CCT5-201	protein_coding	3293	11	10	Low Confidence
ENST00000280527.7	M8/D6	2	2.91899	1.54517	2.05107	ENST00000280527.7 M8/D6	0.0016644	ENSG00000150938.10	CRIM1	protein_coding	CRIM1-201	protein_coding	6060	17	16	Medium Confidence
ENST00000280551.11	D5/D6	4	0.66774	-0.583553	2.04773	ENST00000280551.11 D5/D6	0.00136194	ENSG00000150961.15	SEC24D	protein_coding	SEC24D-201	protein_coding	4018	23	22	Medium Confidence
ENST00000280551.11	M8/D6	4	0.766084	-0.385389	2.09868	ENST00000280551.11 M8/D6	0.0240243	ENSG00000150961.15	SEC24D	protein_coding	SEC24D-201	protein_coding	4018	23	22	Medium Confidence
ENST00000280557.11	D5/D6	3	1.20966	0.274602	0.104579	ENST00000280557.11 D5/D6	0.0133228	ENSG00000139726.11	DENR	protein_coding	DENR-201	protein_coding	2719	8	7	High Confidence
ENST00000280557.11	M8/D6	3	1.22999	0.29841	1.26953	ENST00000280557.11 M8/D6	0.0121346	ENSG00000139726.11	DENR	protein_coding	DENR-201	protein_coding	2719	8	7	High Confidence
ENST00000280571.10	D5/D6	4	1.16486	0.218907	2.4054	ENST00000280571.10 D5/D6	0.0197972	ENSG00000150977.11	RILPL2	protein_coding	RILPL2-201	protein_coding	1752	4	3	Medium Confidence
ENST00000280612.9	M8/D6	3	1.21392	0.279484	1.135	ENST00000280612.9 M8/D6	0.0534486	ENSG00000151012.13	SLC7A11	protein_coding	SLC7A11-201	protein_coding	9645	12	11	High Confidence
ENST00000280665.11	M8/D6	3	1.29208	0.369111	2.01521	ENST00000280665.11 M8/D6	0.0466786	ENSG00000151065.14	DCP1B	protein_coding	DCP1B-201	protein_coding	2033	9	8	Medium Confidence
ENST00000280700.10	F7/D6	2	1.20081	0.263552	2.51784	ENST00000280700.10 F7/D6	0.0486142	ENSG00000151092.18	NGLY1	protein_coding	NGLY1-202	protein_coding	2534	12	11	Medium Confidence
ENST00000280756.9	F7/D6	3	1.62593	0.697073	5.34835	ENST00000280756.9 F7/D6	0.00334275	ENSG00000151135.10	TMEM263	protein_coding	TMEM263-201	protein_coding	3228	4	3	Low Confidence
ENST00000280756.9	M8/D6	3	0.708511	-0.498445	3.01013	ENST00000280756.9 M8/D6	0.00909223	ENSG00000151135.10	TMEM263	protein_coding	TMEM263-201	protein_coding	3228	4	3	Medium Confidence
ENST00000280904.11	F7/D6	2	2.46242	1.29919	3.49855	ENST00000280904.11 F7/D6	0.0227914	ENSG00000134755.18	DSC2	protein_coding	DSC2-202	protein_coding	12331	16	15	Medium Confidence
ENST00000281017.8	D5/D6	2	1.20734	0.271658	1.54061	ENST00000281017.8 D5/D6	0.0495627	ENSG00000151353.15	TMEM18	protein_coding	TMEM18-201	protein_coding	6187	5	4	Low Confidence
ENST00000281017.8	F7/D6	2	1.1556	0.208624	0.474245	ENST00000281017.8 F7/D6	0.182321	ENSG00000151353.15	TMEM18	protein_coding	TMEM18-201	protein_coding	6187	5	4	Low Confidence
ENST00000281031.5	M8/D6	3	0.779785	-0.358856	0.161838	ENST00000281031.5 M8/D6	0.0109605	ENSG00000151366.13	NDUFC2	protein_coding	NDUFC2-201	protein_coding	2168	3	2	High Confidence
ENST00000281038.10	D5/D6	3	1.27313	0.348264	0.899628	ENST00000281038.10 D5/D6	0.0975393	ENSG00000137513.11	NARS2	protein_coding	NARS2-201	protein_coding	2512	14	13	High Confidence
ENST00000281141.9	D5/D6	4	1.2766	0.352177	0.759848	ENST00000281141.9 D5/D6	0.00742943	ENSG00000151465.14	CDC123	protein_coding	CDC123-201	protein_coding	1321	13	12	High Confidence
ENST00000281243.10	D5/D6	2	1.22258	0.289931	0.115567	ENST00000281243.10 D5/D6	0.0424212	ENSG00000151552.13	QDPR	protein_coding	QDPR-201	protein_coding	1507	7	6	Low Confidence
ENST00000281273.8	D5/D6	2	1.38479	0.468905	3.24979	ENST00000281273.8 D5/D6	0.140084	ENSG00000151576.10	QTRT2	protein_coding	QTRT2-201	protein_coding	4023	10	9	Medium Confidence
ENST00000281382.11	M8/D6	2	0.639298	-0.646635	4.07071	ENST00000281382.11 M8/D6	0.00821402	ENSG00000151665.13	PIGF	protein_coding	PIGF-201	protein_coding	1294	6	5	Low Confidence
ENST00000281455.7	D5/D6	2	0.845041	-0.243199	2.01154	ENST00000281455.7 D5/D6	0.0413754	ENSG00000151726.16	ACSL1	protein_coding	ACSL1-201	protein_coding	3712	21	20	Medium Confidence
ENST00000281456.11	D5/D6	2	1.36169	0.445296	1.1787	ENST00000281456.11 D5/D6	0.00305232	ENSG00000151729.11	SLC25A4	protein_coding	SLC25A4-201	protein_coding	4415	4	3	Low Confidence
ENST00000281471.11	M8/D6	3	1.53523	0.616492	3.73195	ENST00000281471.11 M8/D6	0.0316538	ENSG00000151743.11	AMN1	protein_coding	AMN1-201	protein_coding	1952	7	6	Low Confidence
ENST00000281513.10	D5/D6	2	0.908889	-0.157078	16.2294	ENST00000281513.10 D5/D6	0.143612	ENSG00000151779.14	NBAS	protein_coding	NBAS-201	protein_coding	7278	52	51	Low Confidence
ENST00000281623.8	F7/D6	3	1.44363	0.524612	6.04392	ENST00000281623.8 F7/D6	0.0380599	ENSG00000151876.13	FBXO4	protein_coding	FBXO4-201	protein_coding	1655	7	6	Low Confidence
ENST00000281623.8	M8/D6	2	1.37376	0.458105	0.639383	ENST00000281623.8 M8/D6	0.0700169	ENSG00000151876.13	FBXO4	protein_coding	FBXO4-201	protein_coding	1655	7	6	Low Confidence
ENST00000281631.10	D5/D6	3	1.34434	0.422987	5.13394	ENST00000281631.10 D5/D6	0.0348498	ENSG00000151883.19	PARP8	protein_coding	PARP8-201	protein_coding	7475	26	25	Low Confidence
ENST00000281701.11	M8/D6	3	0.707994	-0.498234	0.54666	ENST00000281701.11 M8/D6	0.0519665	ENSG00000143748.18	NVL	protein_coding	NVL-201	protein_coding	2897	23	22	High Confidence
ENST00000281828.8	D5/D6	3	1.48121	0.566769	0.249319	ENST00000281828.8 D5/D6	0.000163866	ENSG00000116120.11	FARSB	protein_coding	FARSB-201	protein_coding	6761	17	16	High Confidence
ENST00000281828.8	F7/D6	3	1.19499	0.256376	2.09589	ENST00000281828.8 F7/D6	0.0482724	ENSG00000116120.11	FARSB	protein_coding	FARSB-201	protein_coding	6761	17	16	Medium Confidence
ENST00000281834.4	D5/D6	4	0.243237	-2.04216	3.38013	ENST00000281834.4 D5/D6	3.39567e-05	ENSG00000117586.11	TNFSF4	protein_coding	TNFSF4-201	protein_coding	3492	3	2	Medium Confidence
ENST00000281834.4	F7/D6	2	0.775741	-0.366353	0.0273698	ENST00000281834.4 F7/D6	0.041596	ENSG00000117586.11	TNFSF4	protein_coding	TNFSF4-201	protein_coding	3492	3	2	Low Confidence
ENST00000281834.4	M8/D6	3	0.792594	-0.335812	1.80101	ENST00000281834.4 M8/D6	0.0302164	ENSG00000117586.11	TNFSF4	protein_coding	TNFSF4-201	protein_coding	3492	3	2	Medium Confidence
ENST00000281871.11	D5/D6	2	1.21287	0.278202	1.77892	ENST00000281871.11 D5/D6	0.0461637	ENSG00000152082.15	MZT2B	protein_coding	MZT2B-201	protein_coding	599	3	2	Low Confidence
ENST00000282026.2	M8/D6	3	1.42179	0.50749	1.23506	ENST00000282026.2 M8/D6	0.0494981	ENSG00000152213.4	ARL11	protein_coding	ARL11-201	protein_coding	3552	2	1	High Confidence
ENST00000282050.6	M8/D6	2	0.876817	-0.189863	1.71084	ENST00000282050.6 M8/D6	0.0477423	ENSG00000152234.16	ATP5F1A	protein_coding	ATP5F1A-201	protein_coding	1945	13	12	Low Confidence
ENST00000282058.11	M8/D6	3	1.19249	0.253978	0.128656	ENST00000282058.11 M8/D6	0.0703482	ENSG00000152240.13	HAUS1	protein_coding	HAUS1-201	protein_coding	1072	9	8	High Confidence
ENST00000282074.7	M8/D6	4	2.46316	1.29926	2.38148	ENST00000282074.7 M8/D6	0.000421505	ENSG00000152253.9	SPC25	protein_coding	SPC25-201	protein_coding	1342	7	6	Medium Confidence
ENST00000282077.8	D5/D6	3	0.728694	-0.458089	3.22825	ENST00000282077.8 D5/D6	0.0268757	ENSG00000152256.14	PDK1	protein_coding	PDK1-201	protein_coding	14072	11	10	Medium Confidence
ENST00000282077.8	M8/D6	3	0.738361	-0.43882	2.88025	ENST00000282077.8 M8/D6	0.0342825	ENSG00000152256.14	PDK1	protein_coding	PDK1-201	protein_coding	14072	11	10	Medium Confidence
ENST00000282268.7	F7/D6	3	0.472174	-1.10606	13.0341	ENST00000282268.7 F7/D6	0.0280279	ENSG00000152422.16	XRCC4	protein_coding	XRCC4-201	protein_coding	1696	8	7	Low Confidence
ENST00000282268.7	M8/D6	3	0.401175	-1.33541	10.6266	ENST00000282268.7 M8/D6	0.0127482	ENSG00000152422.16	XRCC4	protein_coding	XRCC4-201	protein_coding	1696	8	7	Low Confidence
ENST00000282272.15	F7/D6	2	0.689033	-0.537932	2.82901	ENST00000282272.15 F7/D6	0.0326168	ENSG00000065413.20	ANKRD44	protein_coding	ANKRD44-201	protein_coding	6087	28	27	Medium Confidence
[truncated: 8,220 more rows]

## Sheet: Supplementary Table 6
Table S6. Ratio-based differential expressed isoforms (DEIs) reference datasets.
isoform	compare	Final	Freq	isoform_compare	feature_type	fc_mean	log2FC	medianp	uncertainty	classification
ENST00000000412.8	D5/D6	non-DEI	3	ENST00000000412.8 D5/D6	non-DEI	1.08482	0.117127	0.0277508	1.50735	High Confidence
ENST00000000412.8	F7/D6	non-DEI	3	ENST00000000412.8 F7/D6	non-DEI	0.839804	-0.253989	0.00194799	3.86152	Low Confidence
ENST00000001008.6	M8/D6	non-DEI	2	ENST00000001008.6 M8/D6	non-DEI	0.855567	-0.225049	0.0163064	0.151626	Low Confidence
ENST00000002165.11	D5/D6	non-DEI	4	ENST00000002165.11 D5/D6	non-DEI	0.727293	-0.459469	0.0114198	0.600953	High Confidence
ENST00000002165.11	M8/D6	non-DEI	2	ENST00000002165.11 M8/D6	non-DEI	0.856085	-0.224278	0.0396799	1.20028	Low Confidence
ENST00000002596.6	M8/D6	up-regulate	2	ENST00000002596.6 M8/D6	up-regulate	2.44597	1.28883	0.0143865	4.67578	Low Confidence
ENST00000003100.13	M8/D6	non-DEI	4	ENST00000003100.13 M8/D6	non-DEI	1.39081	0.46861	0.0295281	5.88788	Low Confidence
ENST00000005257.7	D5/D6	non-DEI	2	ENST00000005257.7 D5/D6	non-DEI	0.844148	-0.244528	0.037433	1.15608	Low Confidence
ENST00000005257.7	F7/D6	non-DEI	2	ENST00000005257.7 F7/D6	non-DEI	1.16197	0.216572	0.0842261	0.0184191	Low Confidence
ENST00000005259.9	M8/D6	non-DEI	2	ENST00000005259.9 M8/D6	non-DEI	1.31376	0.393047	0.0341753	3	Medium Confidence
ENST00000005260.9	F7/D6	up-regulate	3	ENST00000005260.9 F7/D6	up-regulate	2.23632	1.15207	0.000330259	7.71821	Low Confidence
ENST00000006750.8	D5/D6	non-DEI	2	ENST00000006750.8 D5/D6	non-DEI	0.776657	-0.36471	0.00679166	0.898285	Low Confidence
ENST00000006750.8	M8/D6	non-DEI	2	ENST00000006750.8 M8/D6	non-DEI	1.34728	0.429477	0.0094599	2.80956	Medium Confidence
ENST00000006777.11	D5/D6	non-DEI	3	ENST00000006777.11 D5/D6	non-DEI	0.528709	-0.919688	0.000951731	1.27053	High Confidence
ENST00000007390.3	M8/D6	non-DEI	2	ENST00000007390.3 M8/D6	non-DEI	0.789886	-0.34047	0.13702	1.60835	Low Confidence
ENST00000007516.8	M8/D6	non-DEI	3	ENST00000007516.8 M8/D6	non-DEI	0.832938	-0.263784	0.0456485	0.66528	High Confidence
ENST00000008527.10	D5/D6	up-regulate	4	ENST00000008527.10 D5/D6	up-regulate	5.30361	2.40613	2.55962e-06	1.98353	Medium Confidence
ENST00000008527.10	F7/D6	up-regulate	4	ENST00000008527.10 F7/D6	up-regulate	2.81083	1.48927	0.000102529	2.8384	Medium Confidence
ENST00000008527.10	M8/D6	non-DEI	2	ENST00000008527.10 M8/D6	non-DEI	1.38179	0.46634	0.0605176	1.6619	Low Confidence
ENST00000009530.13	F7/D6	non-DEI	3	ENST00000009530.13 F7/D6	non-DEI	0.72614	-0.461684	0.000130991	0.18205	High Confidence
ENST00000009530.13	M8/D6	non-DEI	2	ENST00000009530.13 M8/D6	non-DEI	0.849151	-0.236727	0.0311925	3.36983	Medium Confidence
ENST00000009589.8	D5/D6	non-DEI	2	ENST00000009589.8 D5/D6	non-DEI	1.09748	0.133769	0.0473979	2.43609	Medium Confidence
ENST00000009589.8	F7/D6	non-DEI	3	ENST00000009589.8 F7/D6	non-DEI	1.14583	0.196349	0.0590598	0.51058	High Confidence
ENST00000011619.6	D5/D6	non-DEI	2	ENST00000011619.6 D5/D6	non-DEI	0.91361	-0.13093	0.336387	2.8352	Medium Confidence
ENST00000012443.9	M8/D6	non-DEI	2	ENST00000012443.9 M8/D6	non-DEI	0.89859	-0.154281	0.357051	0.469982	Low Confidence
ENST00000013070.11	D5/D6	non-DEI	3	ENST00000013070.11 D5/D6	non-DEI	0.843628	-0.245416	0.035927	0.808247	High Confidence
ENST00000013070.11	M8/D6	non-DEI	4	ENST00000013070.11 M8/D6	non-DEI	1.47638	0.561895	0.00770547	0.882216	High Confidence
ENST00000014914.6	D5/D6	non-DEI	2	ENST00000014914.6 D5/D6	non-DEI	0.600698	-0.735555	0.051051	1.92069	Medium Confidence
ENST00000014914.6	M8/D6	non-DEI	2	ENST00000014914.6 M8/D6	non-DEI	0.550332	-0.861892	0.0544927	1.92368	Medium Confidence
ENST00000014930.9	D5/D6	up-regulate	4	ENST00000014930.9 D5/D6	up-regulate	2.25242	1.1714	0.00944635	0.605729	High Confidence
ENST00000028008.9	F7/D6	non-DEI	2	ENST00000028008.9 F7/D6	non-DEI	0.657989	-0.617254	0.0270441	13.5607	Low Confidence
ENST00000033079.7	F7/D6	non-DEI	2	ENST00000033079.7 F7/D6	non-DEI	0.836624	-0.278856	0.2243	17.1394	Low Confidence
[truncated: 9,522 more rows]

## Sheet: Supplementary Table 7
Table S7. The log2 fold changes and p values of reference isoforms tested in reference datasets and qPCR results
[truncated: 215 more rows]

[truncated: 7 more sheets: Supplementary Table 8, Supplementary Table 9, Supplementary Table 10, Supplementary Table 11, Supplementary Table 12, Supplementary Table 13, Supplementary Table 14]
